# Supplementary material for: Does perturbation-based balance training prevent falls among individuals with chronic stroke? A randomised controlled trial
Source: PubMed Central journal article supplement — BMJ Open. 2018 Aug 17;8(8):e021510. doi: 10.1136/bmjopen-2018-021510 (PMC6104758; doi:10.1136/bmjopen-2018-021510), 2018-08-17
Supplement: bmjopen-2018-021510.draft_revisions.pdf [file bmjopen-2018-021510.draft_revisions.pdf]

# BMJ Open

BMJ Open is committed to open peer review. As part of this commitment we make the peer review history of every article we publish publicly available.

When an article is published we post the peer reviewers' comments and the authors' responses online. We also post the versions of the paper that were used during peer review. These are the versions that the peer review comments apply to.

The versions of the paper that follow are the versions that were submitted during the peer review process. They are not the versions of record or the final published versions. They should not be cited or distributed as the published version of this manuscript.

BMJ Open is an open access journal and the full, final, typeset and author-corrected version of record of the manuscript is available on our site with no access controls, subscription charges or pay-per-view fees (<http://bmjopen.bmj.com>).

If you have any questions on BMJ Open's open peer review process please email [info.bmjopen@bmj.com](mailto:info.bmjopen@bmj.com)

# BMJ Open

## Does perturbation-based balance training prevent falls among individuals with chronic stroke? A randomized controlled trial.

|                               |                                                                                                                                                                                                                                                                                                                                                                                                                                                                                                                                         |
|-------------------------------|-----------------------------------------------------------------------------------------------------------------------------------------------------------------------------------------------------------------------------------------------------------------------------------------------------------------------------------------------------------------------------------------------------------------------------------------------------------------------------------------------------------------------------------------|
| Journal:                      | <i>BMJ Open</i>                                                                                                                                                                                                                                                                                                                                                                                                                                                                                                                         |
| Manuscript ID                 | bmjopen-2018-021510                                                                                                                                                                                                                                                                                                                                                                                                                                                                                                                     |
| Article Type:                 | Research                                                                                                                                                                                                                                                                                                                                                                                                                                                                                                                                |
| Date Submitted by the Author: | 02-Feb-2018                                                                                                                                                                                                                                                                                                                                                                                                                                                                                                                             |
| Complete List of Authors:     | Mansfield, Avril; Toronto Rehabilitation Institute, Aquilino, Anthony; Toronto Rehabilitation Institute Danells, Cynthia; Toronto Rehabilitation Institute Knorr, Svetlana; Toronto Rehabilitation Institute Centen, Andrew; Sunnybrook Research Institute DePaul, Vincent; Queen's University Schinkel-Ivy, Alison; Nipissing University Brooks, Dina; University of Toronto, Physical Therapy Inness, Elizabeth; Toronto Rehabilitation Institute, Balance Mobility and Falls Clinic Mochizuki, George; Sunnybrook Research Institute |
| Keywords:                     | Stroke < NEUROLOGY, REHABILITATION MEDICINE, Exercise, Physiotherapy, Accidental falls, Postural balance                                                                                                                                                                                                                                                                                                                                                                                                                                |
|                               |                                                                                                                                                                                                                                                                                                                                                                                                                                                                                                                                         |

SCHOLARONE™  
Manuscripts

Only

1  
2 1 **Title:** Does perturbation-based balance training prevent falls among individuals with chronic stroke? A  
3  
4 2 randomized controlled trial.

5  
6 3 **Authors:** Avril Mansfield, PhD;<sup>1,3</sup> Anthony AQUI, MSc;<sup>1</sup> Cynthia J Danells, MSc;<sup>1,3</sup> Svetlana Knorr,  
7  
8 4 PhD;<sup>1</sup> Andrew Centen, MSc;<sup>2</sup> Vincent G DePaul, PhD;<sup>4</sup> Alison Schinkel-Ivy, PhD;<sup>5</sup> Dina Brooks,  
9  
10 5 PhD;<sup>1,3</sup> Elizabeth L Inness, PhD;<sup>1,3</sup> George Mochizuki, PhD<sup>1-3</sup>

11  
12  
13 6 **Affiliations:** <sup>1</sup>Toronto Rehabilitation Institute, Toronto, ON, Canada; <sup>2</sup>Evaluative Clinical Sciences,  
14  
15 7 Hurvitz Brain Sciences Research Program, Sunnybrook Research Institute, Toronto, ON, Canada;  
16  
17 8 <sup>3</sup>Department of Physical Therapy, University of Toronto, Toronto, ON, Canada; <sup>4</sup>School of  
18  
19 9 Rehabilitation Therapy, Queen's University, Kingston, ON, Canada; <sup>5</sup>Schulich School of Education –  
20  
21 10 School of Physical and Health Education, Nipissing University, North Bay, ON, Canada

22  
23  
24  
25 11 **Corresponding author:** Avril Mansfield; address: 550 University Ave, Toronto, ON, M5G 2A2; tel:  
26  
27 12 416-597-3422 ext 7831; e-mail: [avril.mansfield@uhn.ca](mailto:avril.mansfield@uhn.ca)

28  
29 13 **Word count:** 4,365

30  
31  
32 14 **Funding:** This study was supported by the Canadian Institutes of Health Research (MOP 133577). The  
33  
34 15 authors also acknowledge the support of the Toronto Rehabilitation Institute; equipment and space  
35  
36 16 have been funded with grants from the Canada Foundation for Innovation, Ontario Innovation Trust,  
37  
38 17 and the Ministry of Research and Innovation. AM holds a New Investigator Award from the Canadian  
39  
40 18 Institutes of Health Research (MSH 141983). DB holds a Canada Research Chair. These funding  
41  
42 19 sources had no role in the design of this study and will not have any role during its execution, analyses,  
43  
44 20 interpretation of the data, or decision to submit results.

45  
46  
47  
48 21 **Acknowledgements:** We thank the members of the Data Safety and Monitoring Committee (Kathryn  
49  
50 22 Sibley, Susan Marzolini, Parvin Eftekhari and Irene Antunes) who monitored the trial. We also  
51  
52 23 acknowledge Rabea Aryan and Ellen Cohen for assistance with administering the intervention, Jyoti  
53  
54  
55  
56  
57  
58  
59  
60

1  
2 24 Mann and Andrew Huntley for assistance with data processing, and Cynthia Campos for assistance  
3  
4 25 with creating the training manual.  
5  
6  
7  
8  
9  
10  
11  
12  
13  
14  
15  
16  
17  
18  
19  
20  
21  
22  
23  
24  
25  
26  
27  
28  
29  
30  
31  
32  
33  
34  
35  
36  
37  
38  
39  
40  
41  
42  
43  
44  
45  
46  
47  
48  
49  
50  
51  
52  
53  
54  
55  
56  
57  
58  
59  
60

For peer review only

1

2 26 **ABSTRACT** (word count: 300; max: 300)

3

4 27 **Objectives:** No intervention has been shown to prevent falls post-stroke. We aimed to determine if

5

6 28 perturbation-based balance training (PBT) can reduce falls in daily life among individuals with chronic

7

8 29 stroke.

9

10 30 **Design:** Assessor-blinded randomized controlled trial.

11

12 31 **Setting:** Two academic hospitals in an urban area.

13

14 32 **Interventions:** Participants were allocated using stratified blocked randomization to either ‘traditional’

15

16 33 balance training (control) or PBT. PBT focused on improving responses to instability, whereas

17

18 34 traditional balance training focused on maintaining stability during functional tasks. Training sessions

19

20 35 were 1 hour twice/week for 6 weeks. Participants were also invited to complete 2 ‘booster’ training

21

22 36 sessions during the follow-up.

23

24 37 **Participants:** Eighty-eight participants with chronic stroke (>6-months post-stroke) were recruited and

25

26 38 randomly allocated one of the two interventions. Five participants withdrew; 42 (control) and 41 (PBT

27

28 39 group) were included in the analysis.

29

30 40 **Primary and secondary outcome measures:** The primary outcome was rate of falls in the 12-months

31

32 41 post-training. Negative binomial regression was used to compare fall rates between groups. Secondary

33

34 42 outcomes were measures of balance, mobility, balance confidence, physical activity, and social

35

36 43 integration.

37

38 44 **Results:** PBT participants reported 53 falls (1.45 falls/person-year) and control participants reported 64

39

40 45 falls (1.72 falls/person-year; rate ratio: 0.85 [0.42, 1.69]; p=0.63). Per-protocol analysis included 32

41

42 46 PBT and 34 control participants who completed at least 10/12 initial training sessions and 1 booster

43

44 47 session. Within this sub-set, PBT participants reported 32 falls (1.07 falls/person-year) and control

45

46 48 participants reported 57 falls (1.75 falls/person-year; rate ratio: 0.62 [0.29, 1.30]; p=0.20). PBT

47

48 49 participants had greater improvement in reactive balance control than the control group, and these

49

50

51

52

53

54

55

56

57

58

59

60

1  
2 50 improvements were sustained 12-months post-training. There were no intervention-related serious  
3  
4 51 adverse effects.  
5

6 52 **Conclusions:** The results are inconclusive. PBT may help to prevent falls in daily life post-stroke, but  
7  
8  
9 53 ongoing training may be required to maintain the benefits.  
10

11 54 **Trial registration:** ISRCTN05434601.  
12

13 55 **Funding:** Canadian Institutes of Health Research.  
14

15 56 **Key words:** Stroke; Rehabilitation; Exercise; Physiotherapy; Accidental Falls; Postural balance  
16  
17  
18  
19  
20  
21  
22  
23  
24  
25  
26  
27  
28  
29  
30  
31  
32  
33  
34  
35  
36  
37  
38  
39  
40  
41  
42  
43  
44  
45  
46  
47  
48  
49  
50  
51  
52  
53  
54  
55  
56  
57  
58  
59  
60

## STRENGTHS AND LIMITATIONS OF THE STUDY

- This study employed an assessor-blinded randomized controlled trial. As is typical of exercise studies, participant blinding was not possible.
- Attendance to the intervention was high (mean 87% of sessions attended), and rates of withdrawal from the study were low (<6%).
- The primary outcome (falls in daily life) was collected via self-report, which may have led to under-reporting.
- Inclusion and exclusion criteria were minimal so that results would be generalizable to a broad population of individuals with chronic stroke. However, recruited participants were, on average, high functioning; these results might not apply to more severely-affected individuals with stroke.

## INTRODUCTION

People with stroke have increased fall risk compared to age-matched individuals who have not had a stroke.<sup>1</sup> Impaired balance control, low balance confidence, and high rate of falls post-stroke are associated with reduced quality of life and reduced physical activity as a strategy to prevent falls.<sup>2,3</sup> Physical exercise, particularly exercise that includes balance training, can reduce fall rates in older adults.<sup>4</sup> However, studies including individuals with stroke have not demonstrated reduced fall rates following balance training.<sup>5,6</sup>

Balance training programs typically include exercises that aim to improve the ability to maintain balance when keeping still (e.g., standing with reduced base of support) or during voluntary movement (e.g., sit-to-stand or step ups).<sup>7-11</sup> This type of balance training may prevent falls by reducing the risk of losing balance in daily life. However, occasional loss of balance may be an inevitable consequence of mobility, so the ability to react quickly after losing balance is essential to prevent falls.<sup>12</sup> Perturbation-based balance training (PBT) is a type of exercise where participants repeatedly experience loss of balance in order to practice and improve control of balance reactions.<sup>13</sup> A review of small-sample randomized controlled trials suggests that PBT can prevent falls in older adults and individuals with Parkinson's disease.<sup>14</sup>

People with stroke have impaired reactive balance control,<sup>15,16</sup> and impaired control of balance reactions is related to increased fall rates in daily life post-stroke.<sup>17,18</sup> PBT can improve reactive balance control post-stroke.<sup>19</sup> A non-randomized study found that those who completed PBT during in-patient stroke rehabilitation fell less frequently post-discharge than those who did not.<sup>20</sup>

The main purpose of this study was to determine if PBT reduces fall rates in people with chronic stroke. A secondary purpose was to determine the effect of PBT on balance control, balance confidence, mobility, daily physical activity, and social integration. We hypothesized that, compared to a control group who completed 'traditional' balance training, those who completed PBT would



1  
2 93 experience fewer falls in the year post-training and would have greater improvements in measures of  
3  
4 94 functional balance and mobility. Additionally, we expected that, due to reduced fall rates and improved  
5  
6 95 balance confidence, participants who completed PBT would be less likely to restrict daily physical  
7  
8  
9 96 activities; therefore, we hypothesized that participants who completed PBT would show increased daily  
10  
11 97 physical activity and improved social integration compared to those in the control group.  
12

## 13 98

## 15 99 **METHODS**

### 16 99 **Methods**

### 18 100 **Trial design**

19  
20 101 This assessor-blinded pragmatic randomized controlled trial took place at the Toronto Rehabilitation  
21  
22 102 Institute (University Health Network) and Sunnybrook Health Sciences Centre. Individuals with  
23  
24  
25 103 chronic stroke were recruited and randomly assigned to either: 1) PBT or 2) 'traditional' balance  
26  
27 104 training (control group). The full study protocol is available elsewhere,<sup>21</sup> protocol modifications are  
28  
29 105 detailed in the relevant sections below. The protocol and amendments were approved by the University  
30  
31 106 Health Network (study ID: 14-7428) and Sunnybrook Health Sciences Centre (study ID: 134-2014)  
32  
33  
34 107 Research Ethics Boards.  
35

### 36 108

### 38 109 **Participants**

39 109  
40  
41 110 Community-dwelling adults with chronic stroke (>6 months post-stroke) were recruited from research  
42  
43 111 volunteer databases and advertisements in the community. Participants could stand independently  
44  
45 112 without upper-limb support for >30s and tolerate at least 10 postural perturbations. Exclusion criteria  
46  
47  
48 113 were: >2.1m tall and/or weighing >150kg; other neurological conditions; lower extremity amputation;  
49  
50 114 unable to understand instructions in English; recent (last 6 months) significant illness, injury or  
51  
52 115 surgery; severe osteoporosis (diagnosis of osteoporosis with fracture); poorly controlled diabetes or  
53  
54  
55 116 hypertension; contraindications to physical exercise;<sup>22</sup> receiving physiotherapy or supervised exercise  
56  
57  
58  
59  
60

1  
2 117 targeting balance and mobility; and/or received PBT in the year before enrolment. Due to difficulty  
3  
4 118 recruiting, the protocol was amended to allow individuals <50 years old to participate. Volunteers  
5  
6 119 completed telephone screening and subsequently attended an initial assessment where written informed  
7  
8  
9 120 consent was obtained and eligibility was confirmed. To help alleviate barriers to participation,  
10  
11 121 participants were compensated for travel expenses (public transit fare or parking).  
12

## 13 122

### 14 123 **Interventions**

15  
16 124 Participants completed 2 1-hour training sessions per week for 6 weeks, and 2 1-hour 'booster' training  
17  
18 125 sessions 3- and 9-months after the initial training period. Interventions were administered by a  
19  
20 126 physiotherapist (CJD or SK) on a 1:1 basis (i.e., one physiotherapist per participant) in research  
21  
22 127 laboratories in academic hospitals. Both laboratories contained a 2.63 x 2.63m 4-post XY patient lift  
23  
24 128 gantry (Prism Medical Ltd, Concord, ON, Canada), and the Sunnybrook laboratory also contained a  
25  
26 129 8.5m long ceiling lift track, to which the safety harness was attached during PBT. Physiotherapists  
27  
28 130 were trained in delivering the control intervention by reviewing the intervention developers'  
29  
30 131 documentation,<sup>23</sup> and in delivering the PBT intervention by study investigators (AM and VGD).  
31  
32 132 Interventions followed a general guide, but were tailored to participants' ability and balance  
33  
34 133 impairments. Participants rated perceived level of challenge on a 5-point scale (see Supplementary  
35  
36 134 Material) after completing each exercise set. The physiotherapists documented activities in each  
37  
38 135 session, perceived level of challenge, adverse events, and deviations from prescribed activities.  
39  
40  
41  
42  
43  
44  
45  
46  
47

### 48 137 *Control group*

49  
50 138 The control group completed the Keep Moving with Stroke program.<sup>23</sup> This is an exercise program for  
51  
52 139 community-dwelling individuals with stroke, based on balance and mobility interventions evaluated in  
53  
54 140 clinical trials.<sup>9-11</sup> This program was designed to be delivered in a group, but was delivered 1:1 in this  
55  
56  
57  
58  
59  
60

1  
2 141 study to match attention received from the physiotherapist by the PBT group. Each session included a  
3  
4 142 5-10 minute warm-up, 40 minutes of mobility and balance exercises, and a 5-10 minute cool-down  
5  
6 143 with stretching. Exercises included walking, sit-to-stand, heel raises, walking while carrying an object,  
7  
8  
9 144 tap-ups or step-ups (forward and sideways), reaching and weight shifting, and standing with reduced  
10  
11 145 base of support.  
12

### 13 146 14 15 16 147 *PBT group*

17  
18 148 PBT sessions included a 5-10 minute warm-up, voluntary tasks intended to induce internal  
19  
20 149 perturbations, voluntary tasks combined with external perturbations, and a 5-10 minute cool-down.  
21  
22 150 Participants were supervised by the physiotherapist and wore a custom safety harness (ABG Concept  
23  
24  
25 151 Médical Inc., Valcourt, QC, Canada) attached to the overhead support. Internal perturbations occurred  
26  
27 152 when participants failed to control balance during voluntary movement; ‘agility’ tasks, such as kicking  
28  
29 153 a soccer ball, were used to induce internal perturbations. External perturbations were caused by forces  
30  
31  
32 154 outside participants’ control (e.g., push or pull from the physiotherapist). We aimed for at least 60  
33  
34 155 postural perturbations per session, and set the task difficulty such that participants required an upper  
35  
36 156 extremity response, external assistance (i.e., from the overhead harness or physiotherapist), or a multi-  
37  
38  
39 157 step response ~50% of the time. The progression in voluntary tasks occurred on a continuum from  
40  
41 158 stable to mobile, and from predictable to unpredictable.<sup>24</sup> Additionally, progression occurred by  
42  
43 159 increasing the magnitude of external perturbation, or imposing sensory or environmental challenges.  
44  
45  
46 160 The full PBT program is available in the Supplementary Material.  
47

### 48 161 49 50 162 **Group allocation**

51  
52 163 Participants were assigned using blocked stratified randomization with allocation concealment to either  
53  
54  
55 164 the control or PBT group by the principal investigator (AM), who was not involved in recruiting,  
56  
57  
58  
59  
60

1  
2 165 assessments, or intervention administration. A variable block size of 4, 6 or 8 was used. There were  
3  
4 166 four strata from two stratification factors: site (two levels), and frequency of ‘failures’ during baseline  
5  
6 167 reactive balance control assessment<sup>17</sup> (two levels). The random allocation sequence was computer  
7  
8  
9 168 generated and maintained in an electronic file by the principal investigator.  
10

## 11 169 12 13 170 **Outcomes**

### 14 15 16 171 *Cohort descriptors*

17  
18 172 Demographic and stroke information were recorded at study enrolment: age, sex, time since stroke,  
19  
20 173 lesion location, falls history, National Institutes of Health Stroke Scale (NIH-SS<sup>25</sup>), and Chedoke-  
21  
22 174 McMaster Stroke Assessment (CMSA) foot and leg scores.<sup>26</sup> Demographics and medical history were  
23  
24  
25 175 obtained by self-report and, when possible, verified from participants’ hospital charts.  
26

### 27 176 28 29 177 *Primary outcome – falls*

30  
31  
32 178 A fall was defined as “an event that results in a person coming to rest unintentionally on the ground or  
33  
34 179 other lower level”.<sup>27</sup> Participants completed 12-months of falls reporting after the initial 6-week  
35  
36 180 training period. Participants were provided stamped addressed postcards containing a 2-week calendar  
37  
38  
39 181 to record falls, which they completed daily, and returned to the research team fortnightly. If a postcard  
40  
41 182 was not returned within 2 weeks the research assistant called the participant to ascertain if they fell.  
42  
43 183 Participants who fell completed a short telephone questionnaire regarding the cause, circumstances, and  
44  
45 184 consequences of the fall. Falls were excluded from analysis, by unanimous decision of two blinded  
46  
47  
48 185 research assistants, if they were caused by loss of consciousness or an overwhelming external force  
49  
50 186 (i.e., if anyone would fall in that situation). If the research assistants could not agree that a fall should  
51  
52 187 be excluded, that fall was included in the analysis.  
53  
54  
55 188

1  
2 189 *Secondary outcomes*  
3  
4 190 Balance and mobility and balance confidence were assessed immediately before, immediately after,  
5  
6 191 and 6- and 12-months after the end of the initial training period. Functional balance and mobility were  
7  
8 192 assessed using the Berg balance scale (BBS<sup>28</sup>), the mini-Balance Evaluation Systems test (mini-  
9  
10 193 BEST<sup>29</sup>), and the Timed Up & Go (TUG<sup>30</sup>). The Activities-specific Balance Confidence (ABC)  
11  
12 194 questionnaire<sup>31</sup> was used to assess balance confidence in daily activities.

13  
14  
15  
16 195 Physical activity and social integration were evaluated with the Physical Activity Scale for  
17  
18 196 Individuals with Physical Disabilities (PASIPD<sup>32</sup>) and the Subjective Index of Physical and Social  
19  
20 197 Outcome (SIPSO<sup>33</sup>), respectively, at baseline and every 2 months during the 12-month follow-up.

21  
22  
23 198

## 24 25 199 **Blinding**

26  
27 200 The research assistants (AA and AC) were blinded to group allocation and were responsible for  
28  
29 201 screening, recruiting, and collecting data. At the post-training, 6-month, and 12-month assessments, the  
30  
31 202 research assistants guessed group allocation for each participant, rated their confidence in their guess of  
32  
33 203 group allocation, and noted if they had received any information to violate blinding. In cases where  
34  
35 204 blinding was violated, the balance measures were re-coded from video footage by another blinded  
36  
37 205 research assistant.  
38  
39  
40

41 206

## 42 43 207 **Sample size**

44  
45 208 The target sample size was estimated for the primary outcome (fall rate in the year post-training) using  
46  
47 209 a formula for negative binomial regression.<sup>34</sup> Assuming the control group would report 1.75 per  
48  
49 210 person-year,<sup>17</sup> a rate ratio of 0.54,<sup>14</sup> mean follow-up time of 11 months per person, level of significance  
50  
51 211 of 0.05, and power of 0.8, we estimated that 37 participants per group would be required to show a  
52  
53 212 statistically significant between-group difference in fall rates.  
54  
55  
56  
57  
58  
59  
60

## 214 **Statistical analysis**

215 Wilcoxon-Mann-Whitney test (continuous/ordinal variables) and Fisher's exact test  
216 (categorical/frequency variables) were used to compare the two groups at baseline. Negative binomial  
217 regression was used to compare fall rates and logistic regression was used to compare the proportion of  
218 fallers between the two groups. Intent-to-treat analysis was used; all participants with some falls-  
219 monitoring data were included in the analyses. To account for variable falls-monitoring duration  
220 between participants (e.g., due to premature withdrawal from the study) the natural log of the  
221 monitoring duration was included as an offset variable in negative binomial regression, and as a  
222 covariate in logistic regression. Exploratory per-protocol analysis was also conducted, comparing  
223 proportion of fallers and fall rates between the two groups, including only those participants who  
224 attended at least 10/12 of the initial training sessions and 1 booster session. We initially planned to  
225 conduct repeated-measures analysis of variance, with group-by-time interaction, to evaluate the effect  
226 of the interventions on secondary outcome measures.<sup>21</sup> However, because the variables were not  
227 normally distributed we conducted analysis of co-variance (ANCOVA), comparing BBS, mini-BEST,  
228 mini-BEST subscale scores, TUG, ABC, PASIPD, and SIPSO at each time point between groups,  
229 controlling for the value at baseline. Dependent variables were rank transformed prior to entry into the  
230 ANCOVA to allow for non-parametric analysis. Alpha was 0.05 for all analyses.

## 232 **RESULTS**

### 233 **Recruitment**

234 Recruiting occurred between 24 April 2014 and 29 June 2016. Initially, we planned to recruit 46  
235 participants per group to account for a 20% withdrawal rate.<sup>21</sup> However, recruiting was stopped when  
236 we had at least 37 participants per group who had returned at least one fall-reporting postcard. Any

1  
2 237 participants who had started the intervention at this point continued with the study until they either  
3  
4 238 withdrew or completed all study elements. The trial ended when data collection for all recruited  
5  
6 239 participants was complete (August 2017). Forty-four participants were assigned to each group, with 42  
7  
8  
9 240 (control) and 41 (PBT) returning at least 1 fall-reporting postcard (Figure 1); thus 42 control and 41  
10  
11 241 PBT participants were included in analysis of the primary outcome (falls in daily life). Baseline  
12  
13 242 characteristics for these participants are in Table 1; there were no significant differences between  
14  
15  
16 243 groups on any baseline characteristics.  
17

### 20 245 **Intervention adherence**

21  
22  
23 246 During the initial 6-week training program, PBT participants attended a mean 10.5 sessions, with 34/41  
24  
25 247 participants attending at least 10 sessions (out of the prescribed 12). Participants experienced a mean of  
26  
27 248 577 perturbations during all sessions (standard deviation: 195 perturbations; minimum: 42  
28  
29  
30 249 perturbations), or a mean of 55 perturbations per session (standard deviation: 9 perturbations). For all  
31  
32 250 PBT sessions combined, mean rate of balance recovery ‘failures’ was 57%, and mean rate of perceived  
33  
34 251 challenge was 2.4 (on a five-point scale). In the initial 6-week training phase, control participants  
35  
36 252 attended a mean of 11 sessions, with 38/42 participants attending at least 10 sessions (out of the  
37  
38  
39 253 prescribed 12). On average, control participants completed 87% of the prescribed exercises (standard  
40  
41 254 deviation: 18%). For all control training sessions combined, mean rate of perceived challenge was 2.4.  
42

### 45 256 **Outcomes and estimation**

#### 48 257 *Blinding*

49  
50 258 Blinding was violated for 9 participants (7 PBT and 2 control), who revealed their group allocation in  
51  
52  
53 259 conversation with the research assistant. The BBS and mini-BEST scores for these participants were re-  
54  
55 260 coded from video recordings by another blinded research assistant who had no interaction with  
56  
57  
58  
59

1  
2 261 participants. For the remaining participants, the research assistants correctly guessed group allocation  
3  
4 262 56% of the time; i.e., guesses were not correct more often than would be expected by random chance.  
5

6 263  
7

#### 8 264 *Missing data*

9  
10  
11 265 Data were missing at assessment time points because participants: declined to complete the assessment  
12  
13 266 (15 PBT and 21 control assessments); were unavailable due to acute illness (3 control assessments);  
14  
15 267 were unavailable due vacation or other personal commitments (3 control assessments); or could not be  
16  
17 268 contacted at the time of the assessment (6 control assessments). Some participants declined to come to  
18  
19 269 the laboratories for the 6- and 12-month assessments, but were willing to complete the questionnaires  
20  
21 270 (ABC, SIPSO, and PASIPD) over the telephone. Even when participants attended a study appointment,  
22  
23 271 some declined to complete individual tests; the number of individuals included in analysis of each  
24  
25 272 variable at each time point is detailed in the Tables.  
26  
27  
28

29 273  
30

#### 31 274 *Falls*

32  
33  
34 275 In the year post-training, 46% (19/41) of PBT participants and 55% (23/42) of control participants  
35  
36 276 reported at least one fall; the between-group difference in odds of being a ‘faller’ was not statistically  
37  
38 277 significant (odds ratio: 0.71 [0.30, 1.70]; p=0.44). PBT participants reported 53 falls (1.45 falls per  
39  
40 278 person-year) and control participants reported 64 falls (1.72 falls per person-year); the between-group  
41  
42 279 difference in fall rates was not statistically significant (rate ratio: 0.85 [0.42, 1.69]; p=0.63).  
43  
44

45  
46 280 Thirty-two PBT participants and 34 control participants completed at least 10/12 of the initial  
47  
48 281 training sessions and 1 booster session, and were included in per-protocol analysis. Within this sub-set,  
49  
50 282 44% (14/32) of PBT participants and 59% (20/34) of control participants reported at least one fall in  
51  
52 283 the year after training. The between group difference in odds of being a ‘faller’ was not statistically  
53  
54 284 significant (odds ratio: 0.56 [0.21, 1.50]; p=0.25). PBT participants reported 32 falls (1.07 falls per  
55  
56  
57  
58  
59  
60



1  
2 285 person-year) and control participants reported 57 falls (1.75 falls per person-year). The between-group  
3  
4 286 difference in fall rates was not statistically significant (rate ratio: 0.62 [0.29, 1.30];  $p=0.20$ ).

5  
6 287  
7  
8  
9 288 *Balance confidence, balance, mobility, physical activity, and social integration*

10  
11 289 Post-training, the PBT group had higher scores than the control group for the reactive sub-scale of the  
12  
13 290 mini-BEST ( $F_{1,74}=7.33$ ,  $p=0.0084$ ; Table 2), whereas the control group had higher scores than the PBT  
14  
15 291 group for the sensory subscale ( $F_{1,74}=4.19$ ,  $p=0.044$ ). Scores for the reactive sub-scale of the mini-  
16  
17 292 BEST were higher for the PBT group than the control group at 6-months ( $F_{1,57}=8.32$ ,  $p=0.0055$ ) and  
18  
19 293 12-months ( $F_{1,53}=11.59$ ,  $p=0.0013$ ). Likewise, at 12-months, the PBT group had a higher score on the  
20  
21 294 total mini-BEST than the control group ( $F_{1,53}=4.04$ ,  $p=0.049$ ). There were no other statistically  
22  
23 295 significant between-group differences for balance and mobility measures at any time point.  
24  
25

26  
27 296 There were no significant between-group differences for the PASIPD at any time point (Table  
28  
29 297 3). SIPSO scores were significantly higher for the control group compared to the PBT group at 6-  
30  
31 298 months ( $F_{1,59}=6.73$ ,  $p=0.012$ ), 8-months ( $F_{1,54}=4.25$ ,  $p=0.044$ ), 10-months ( $F_{1,61}=4.89$ ,  $p=0.031$ ), and  
32  
33 299 12-months ( $F_{1,59}=4.13$ ,  $p=0.047$ ).  
34  
35

36 300 Data showing change in secondary outcomes over time are presented in the supplementary data  
37  
38 301 (Supplementary Tables S1 and S2). No analyses were conducted on these data.  
39  
40

41 302  
42  
43 303 **Ancillary analysis**

44  
45 304 Additional exploratory analysis compared causes, circumstances, and consequences of falls in daily life  
46  
47 305 between groups (Table 4). There was a significant between-group difference in motor activity at the  
48  
49 306 time of the fall ( $p=0.010$ ). Falls in control participants were more likely to occur during transfers than  
50  
51 307 falls in PBT participants, whereas falls in PBT participants were more likely to occur during  
52  
53 308 reaching/bending than falls in control participants. Participants had something in their hands at the time  
54  
55  
56  
57  
58  
59

1  
2 309 of 45% of control-group falls, compared to 23% of PBT-group falls ( $p=0.023$ ). PBT participants  
3  
4 310 attempted to stop themselves from falling by using a step response for 21%, or a grasping response for  
5  
6 311 18% of falls, whereas control participants tried to prevent the fall by stepping for only 9% of falls, and  
7  
8  
9 312 grasping for 30% of falls; however, this difference was not statistically significant ( $p=0.18$ ). PBT  
10  
11 313 participants required assistance to get up after 48% of falls, compared to just 27% of falls for control  
12  
13 314 participants ( $p=0.040$ ). Injuries resulted from 18 falls (39% of falls) in the PBT group and 20 falls  
14  
15  
16 315 (34% of falls) in the control group ( $p=0.68$ ). Most injuries were minor (e.g., cuts and bruises).  
17  
18 316 Participants sought medical attention after 3 falls (all control): visit to emergency room (2 falls), and  
19  
20 317 treatment from an unspecified healthcare professional (1 fall).  
21  
22  
23 318

## 24 319 **Harms**

25  
26  
27 320 Forty-eight adverse events were possibly, probably, or definitely related to study procedures or  
28  
29 321 interventions among the 88 randomized participants. Events were: fatigue with training (3 PBT, 1  
30  
31 322 control); joint pain during or soon after training (14 PBT, 11 control); delayed onset muscle soreness (5  
32  
33 323 PBT, 8 control); seizure during training (1 PBT participant, with history of frequent seizures);  
34  
35 324 abnormally elevated heart rate and low blood pressure during training (1 control; this participant was  
36  
37 325 withdrawn from the study). For all but this last event, medical attention was not necessary to treat  
38  
39 326 adverse events. In the case of fatigue or joint/muscle pain, the intensity and/or duration of training was  
40  
41 327 reduced until the issue resolved. Additionally, four falls that occurred during the training portion of the  
42  
43 328 study were considered related to study procedures or interventions. In one case (control) the participant  
44  
45  
46 329 fell outside the hospital while on the way to a study appointment. The other three falls were reported by  
47  
48 330 a single PBT participant who noted that he felt more confident, and may have increased risk-taking  
49  
50 331 behaviour, as a result of the intervention. Eight participants experienced serious adverse events  
51  
52  
53  
54  
55  
56  
57  
58  
59  
60

1  
2 332 unrelated to study procedures, but that resulted in study withdrawal: prolonged hospitalization (1 PBT,  
3  
4 333 1 control); another stroke (2 PBT, 3 control); death (1 control); and cancer diagnosis (1 control).  
5  
6  
7 334

## 8 9 335 **DISCUSSION**

10  
11 336 We hypothesized that PBT would reduce fall rates among individuals with stroke; this hypothesis was  
12  
13 337 not supported. While the rate ratio comparing falls rates between the PBT and control groups was 0.85,  
14  
15  
16 338 this was not statistically significant. The pooled rate ratio estimating the effect of exercise on fall rates  
17  
18 339 in community-dwelling older adults is 0.80,<sup>4</sup> which is similar to that observed in the current study. Our  
19  
20 340 sample size was based on a rate ratio of 0.54, which was estimated from a meta-analysis of PBT,<sup>14</sup> that  
21  
22 341 included studies among older adults and individuals with Parkinson's disease. Another non-randomized  
23  
24  
25 342 study reported a fall rate ratio of 0.32 when comparing individuals with sub-acute stroke who  
26  
27 343 completed PBT during in-patient rehabilitation to those who did not.<sup>20</sup> The effect of PBT on fall rates  
28  
29 344 in chronic stroke may be much lower than in other patient populations or individuals with sub-acute  
30  
31  
32 345 stroke and, therefore, the current study may not have had sufficient power to detect the true effect.  
33  
34 346 Conversely, the between-group difference in fall rates was much greater when only individuals who  
35  
36 347 completed at least 80% of initial training sessions and 1 booster session were included in the analysis.  
37  
38  
39 348 The booster sessions may have helped participants to retain the training benefits.<sup>35,36</sup>  
40

41 349 Importantly, the control group also completed balance training; previous studies using similar  
42  
43 350 exercise programs found no effect of balance training on fall rates in people with chronic stroke when  
44  
45 351 compared to a sham intervention<sup>7</sup> or 'usual care'.<sup>37</sup> Thus, we expect that control participants did not  
46  
47  
48 352 have reduced fall risk as a result of completing this program. However, both groups improved balance  
49  
50 353 and mobility following training, and it is possible that improved balance and mobility led to reduced  
51  
52 354 fall risk in the control group.  
53  
54  
55  
56  
57  
58  
59  
60

1  
2 355 Consistent with specificity of training, the PBT group improved reactive balance control  
3  
4 356 (reactive sub-scale of the mini-BEST), but the control group did not,<sup>38</sup> these improvements were  
5  
6 357 retained at 6- and 12-months. This finding agrees with those of Bhatt *et al.*, who found that resistance  
7  
8  
9 358 to falling following a slip was retained up to 6-months after a single PBT session.<sup>36</sup> Despite these  
10  
11 359 retained improvements in reactive balance control, PBT participants did not have a significantly  
12  
13 360 reduced fall risk than control participants. Falls occur when there is a loss of balance and subsequent  
14  
15  
16 361 failure to recover.<sup>39</sup> Improved reactive balance control following PBT should help to prevent falls by  
17  
18 362 improving the ability to recover from a loss of balance. Loss of balance can occur due to an external  
19  
20 363 force or failure of anticipatory balance control. Thus, it is possible that effective fall prevention post-  
21  
22  
23 364 stroke requires sustained improvements in both anticipatory and reactive balance control; home  
24  
25 365 exercise may help participants to retain improvements in anticipatory balance control.<sup>37</sup>  
26

27 366 Contrary to our hypothesis, control participants reported greater social integration 6-12 months  
28  
29  
30 367 post-training than the PBT group. Individual-item SIPSO scores suggest that this finding was primarily  
31  
32 368 driven by control participants reporting increased independence in moving around their local  
33  
34 369 neighbourhoods. The control training program included walking practice during every session, whereas  
35  
36 370 the PBT program only included short bouts of walking in later sessions. This walking practice may  
37  
38  
39 371 have increased control participants' confidence with community mobility. While increased social  
40  
41 372 integration at 6-12 months was not associated with improved physical function, it is likely that the tests  
42  
43 373 used in the current study do not correlate highly with community mobility.<sup>40</sup> Training-related  
44  
45  
46 374 improvements in balance and mobility in both groups, and increased self-reported participation in the  
47  
48 375 control group, were not associated with increased physical activity post-training. While impaired  
49  
50 376 balance and mobility post-stroke may be a barrier to physical activity,<sup>41</sup> improved balance and mobility  
51  
52 377 alone is not sufficient to increase activity.<sup>7,42</sup> It is likely that an intervention that combines behaviour  
53  
54  
55  
56  
57  
58  
59  
60

1  
2 378 change techniques with physical exercise is required to increase long-term participation in physical  
3  
4 379 activity.<sup>43</sup>  
5

6  
7 380 Examining fall characteristics can provide further insight into intervention effects on falls.<sup>20</sup>

8  
9 381 Individuals with stroke seem to be reliant upon upper-extremity reactions to prevent falls in daily life.<sup>27</sup>

10  
11 382 In the current study, participants had something in their hands at the time of the fall for more control  
12  
13 383 group falls than PBT falls, which may have prevented these individuals from using an upper-extremity  
14  
15 384 reaction to prevent the fall.<sup>44</sup> Conversely, training, with a specific focus on reactive stepping, may have  
16  
17 385 made PBT participants less reliant on upper extremity reactions to prevent falls. Participants required  
18  
19 386 assistance to get up from the ground after more PBT group than control group falls; this finding could  
20  
21 387 suggest that those PBT participants who fell were more impaired than PBT participants who did not fall  
22  
23 388 or than those in the control group who fell.  
24  
25 389

26  
27 389

## 28 29 390 **Limitations**

30  
31 391 The primary outcome (falls in daily life) was obtained via self-report. While the method of prospective  
32  
33 392 falls reporting used in the current study is the best available,<sup>45</sup> falls may have been under-reported. The  
34  
35 393 cohort was, on average, relatively high functioning (e.g., median BBS score ~50/56), but had a wide  
36  
37 394 range of physical function (minimum scores for CMSA leg: 3, CMSA foot: 2, BBS: 23, mini-BEST: 5;  
38  
39 395 maximum NIH-SS score: 13; highest TUG time: 119s). This study's findings apply to community-  
40  
41 396 dwelling individuals with chronic stroke who can stand independently for at least 30s. Group allocation  
42  
43 397 blinding was violated for 9 participants. Balance measures for these participants were re-scored by a  
44  
45 398 truly blinded research assistant; however, knowledge of group allocation may have sub-consciously  
46  
47 399 influenced how other data were collected for these participants.  
48  
49

50  
51 400 PASIPD scores were higher at the time points when the questionnaire was administered in-  
52  
53 401 person compared to over the telephone. Physical activity questionnaires, including the PASIPD,<sup>32</sup> are  
54  
55  
56  
57  
58  
59  
60

1  
2 402 often designed to have several methods of administration (e.g., self-administered via in-person or  
3  
4 403 telephone interview).<sup>46</sup> When used in practice, investigators seem to treat administration methods as  
5  
6 404 equivalent; for example, in a multi-site validation study of the International Physical Activity  
7  
8  
9 405 Questionnaire, some sites administered the questionnaire via telephone interview and others via in-  
10  
11 406 person interview.<sup>47</sup> We are not aware of any study that directly compared scores from the PASIPD or  
12  
13 407 any other physical activity questionnaire when administered using different methods. It is possible that  
14  
15  
16 408 scores are higher when administered in-person versus over the telephone as participants' desire for  
17  
18 409 social acceptance was higher when they interacted directly with the research assistant. Alternatively,  
19  
20 410 in-person administration may have led to more accurate scores than telephone administration within  
21  
22 411 this population, who may have subtle cognitive-communication deficits, as the research assistant and  
23  
24  
25 412 participant could avail of non-verbal communication to facilitate completing the questionnaire.  
26  
27 413 However, SIPSO scores did not differ between telephone versus in-person administration. Finally,  
28  
29  
30 414 participants in the current study may have truly been more active in the week prior to the in-person  
31  
32 415 interview compared to the telephone interview to prepare for the tests of physical function. Future  
33  
34 416 studies should investigate the potential influence of administration methods on physical activity  
35  
36 417 questionnaire scores.  
37  
38  
39 418  
40

### 41 419 **Clinical implications**

42  
43 420 While this study found that PBT did not reduce fall rates among the entire cohort, PBT participants  
44  
45 421 improved reactive balance control and retained these improvements up to 12-months post-training.  
46  
47  
48 422 Combined with results of previous studies reporting reduced fall rates following PBT among  
49  
50 423 individuals with sub-acute stroke,<sup>20</sup> chronic stroke with a history of falling,<sup>48</sup> and without stroke,<sup>14</sup>  
51  
52 424 these results suggest that PBT may be a useful addition to existing balance training post-stroke. Joint  
53  
54  
55 425 pain was the most common adverse event related to PBT, which appeared to be most prevalent among  
56  
57  
58  
59  
60

1  
2 426 those with lower-extremity arthritis; these participants were able to complete training with  
3  
4 427 modifications to avoid exacerbating pain (e.g., temporarily reducing perturbation intensity). Therefore,  
5  
6 428 modifications to PBT may be required for those with lower-extremity arthritis. Regular 'booster' PBT  
7  
8  
9 429 training sessions may be necessary to prevent falls long-term.  
10

11 430

12

13 431

14

15

16

17

18

19

20

21

22

23

24

25

26

27

28

29

30

31

32

33

34

35

36

37

38

39

40

41

42

43

44

45

46

47

48

49

50

51

52

53

54

55

56

57

58

59

60

For peer review only

1  
2 432 **Contributorship statement:** AM conceived of the study, is the grant holder, performed statistical  
3  
4 433 analysis and drafted the manuscript. AM, VGD, ASI, DB, ELI, and GM developed the study protocol.  
5  
6 434 AM and GM led implementation of the study at each site. AM, VGD, and ELI developed the  
7  
8  
9 435 intervention. AA, AC and ASI collected data. CJD and SK delivered the interventions. All authors  
10  
11 436 approved the final manuscript.  
12

13 437 **Competing interests statement:** The authors declare that they have no competing interests.  
14

15  
16 438 **Data sharing statement:** Due to research ethics and privacy restrictions, raw data for this study are  
17  
18 439 currently not available publically.  
19  
20  
21  
22  
23  
24  
25  
26  
27  
28  
29  
30  
31  
32  
33  
34  
35  
36  
37  
38  
39  
40  
41  
42  
43  
44  
45  
46  
47  
48  
49  
50  
51  
52  
53  
54  
55  
56  
57  
58  
59  
60



**REFERENCES**

1. Batchelor FA, Mackintosh SF, Said CM, Hill KD. Falls after stroke. *Int J Stroke*. 2012;7(6):482-490.
2. Andersson ÅG, Kamwendo K, Apperlros P. Fear of falling in stroke patients: relationship with previous falls and functional characteristics. *Int J Rehabil Res*. 2008;31:261-264.
3. Schmid AA, Van Puymbroeck M, Altenburger PA, et al. Balance and balance self-efficacy are associated with activity and participation after stroke: a cross-sectional study in people with chronic stroke. *Arch Phys Med Rehabil*. 2012;93:1101-1107.
4. Sherrington C, Michaleff ZA, Fairhall N, et al. Exercise to prevent falls in older adults: an updated systematic review and meta-analysis. *Br J Sports Med*. 2016;doi:10.1136/bjsports-2016-096547.
5. Verheyden GS, Weerdesteyn V, Pickering RM, et al. Interventions for preventing falls in people after stroke. *Cochrane Database Syst Rev*. 2013;31(5):CD008728.
6. Batchelor F, Hill K, Mackintosh S, Said C. What works in falls prevention after stroke? a systematic review and meta-analysis. *Stroke*. 2010;41(8):1715-1722.
7. Dean CM, Rissel C, Sherrington C, et al. Exercise to enhance mobility and prevent falls after stroke: the community stroke club randomized trial. *Neurorehabil Neural Repair*. 2012;26(9):1046-1057.
8. Gardner MM, Buchner DM, Robertson MC, Campbell AJ. Practical implementation of an exercise-based falls prevention programme. *Age Ageing*. 2001;30:77-83.
9. Dean CM, Richards CL, Malouin F. Task-related circuit training improves performance of locomotor tasks in chronic stroke: a randomized controlled pilot trial. *Arch Phys Med Rehabil*. 2000;81:409-417.

- 1  
2 463 **10.** Eng JJ, Chu KS, Kim CM, Dawson AS, Carswell A, Hepburn KE. A community-based group  
3  
4 464 exercise program for persons with chronic stroke. *Med Sci Sports Exerc.* 2003;35(8):1271-1278.  
5
- 6 465 **11.** Salbach NM, Mayo NE, Wood-Dauphinee S, Hanley JA, Richards CL, Côté R. A task-oriented  
7  
8  
9 466 intervention enhances walking distance and speed in the first year post stroke: a randomized  
10  
11 467 controlled trial. *Clin Rehabil.* 2004;18:509-519.  
12
- 13 468 **12.** Maki BE, McIlroy WE. The role of limb movements in maintaining upright stance: the  
14  
15  
16 469 "change-in-support" strategy. *Phys Ther.* 1997;77:488-507.  
17
- 18 470 **13.** Gerards MHG, McCrum C, Mansfield A, Meijer K. Perturbation-based balance training for falls  
19  
20 471 reduction among older adults: current evidence and implications for clinical practice. *Geriatr*  
21  
22 472 *Gerontol Int.* 2017;doi:10.1111/ggi.13082.  
23  
24
- 25 473 **14.** Mansfield A, Wong JS, Bryce J, Knorr S, Patterson KK. Does perturbation-based balance  
26  
27 474 training prevent falls? A review and meta-analysis of preliminary randomized controlled trials.  
28  
29 475 *Phys Ther.* 2015;95(5):700-709.  
30  
31
- 32 476 **15.** Mansfield A, Inness EL, Lakhani B, McIlroy WE. Determinants of limb preference for  
33  
34 477 initiating compensatory stepping post-stroke. *Arch Phys Med Rehabil.* 2012;93:1179-1184.  
35
- 36 478 **16.** de Kam D, Roelofs JMB, Bruijnes AKBD, Geurts ACH, Weerdesteyn V. The next step in  
37  
38  
39 479 understanding impaired reactive balance control in people with stroke: the role of defective  
40  
41 480 early automatic postural responses. *Neurorehabil Neural Repair.* 2017;31(8):708-716.  
42
- 43 481 **17.** Mansfield A, Wong JS, McIlroy WE, et al. Do measures of reactive balance control predict falls  
44  
45  
46 482 in people with stroke returning to the community? *Physiotherapy.* 2015;101(4):373-380.  
47
- 48 483 **18.** Mansfield A, Inness EL, Wong JS, Fraser JE, McIlroy WE. Is impaired control of reactive  
49  
50 484 stepping related to falls during inpatient stroke rehabilitation? *Neurorehabil Neural Repair.*  
51  
52 485 2013;27(6):526-533.  
53  
54  
55  
56  
57  
58  
59  
60

- 1  
2 486 **19.** Mansfield A, Inness EL, Komar J, et al. Training rapid stepping responses in an individual with  
3  
4 487 stroke. *Phys Ther.* 2011;91(6):958-969.  
5
- 6 488 **20.** Mansfield A, Schinkel-Ivy A, Danells CJ, et al. Does perturbation training prevent falls after  
7  
8 discharge from stroke rehabilitation? A prospective cohort study with historical control. *J*  
9 489 *Stroke Cerebrovasc Dis.* 2017;26(10):2174-2180.  
10  
11 490  
12
- 13 491 **21.** Mansfield A, Aquilino A, Centen A, et al. Perturbation training to promote safe independent  
14  
15 mobility post-stroke: study protocol for a randomized controlled trial. *BMC Neurol.* 2015;15:87.  
16 492  
17
- 18 493 **22.** Thomas S, Reading J, Shephard RI. Revision of the Physical Activity Readiness Questionnaire  
19  
20 494 (PAR-Q). *Can J Sport Sci.* 1992;174:338-345.  
21  
22
- 23 495 **23.** French E, Reinikka K, MacLeod A. Community-based exercise for people living with stroke.  
24  
25 496 [http://www.tbrhsc.net/clinical\\_partners/regional\\_stroke\\_program/video\\_resources/community](http://www.tbrhsc.net/clinical_partners/regional_stroke_program/video_resources/community_based_exercise.asp)  
26  
27 497 [based\\_exercise.asp](http://www.tbrhsc.net/clinical_partners/regional_stroke_program/video_resources/community_based_exercise.asp). Accessed 1 Aug, 2013.  
28  
29
- 30 498 **24.** Shumway-Cook A, Woollacott MH. *Motor control: translating research into clinical practice.*  
31  
32 499 3rd ed. Philadelphia: Lippincott Williams & Wilkins; 2007.  
33
- 34 500 **25.** Goldstein LB, Bertels C, Davis JN. Interrater reliability of the NIH Stroke Scale. *Arch Neurol.*  
35  
36 501 1989;46(6):660-662.  
37  
38
- 39 502 **26.** Gowland C, Stratford P, Ward M, et al. Measuring physical impairment and disability with the  
40  
41 503 Chedoke-McMaster Stroke Assessment. *Stroke.* 1993;24:58-63.  
42
- 43 504 **27.** Hyndman D, Ashburn A, Stack E. Fall events among people with stroke living in the  
44  
45 505 community: circumstances of falls and characteristics of fallers. *Arch Phys Med Rehabil.*  
46  
47 506 2002;83:165-170.  
48  
49
- 50 507 **28.** Berg K, Wood-Dauphinée S, Williams JI, Gayton D. Measuring balance in the elderly:  
51  
52 508 preliminary development of an instrument. *Physiother Can.* 1989;41:304-311.  
53  
54  
55  
56  
57  
58  
59  
60

- 1  
2 509 **29.** Frachignoni F, Horak F, Godi M, Nardone A, Giordani A. Using psychometric techniques to  
3  
4 510 improve the balance evaluation systems test: the mini-BES test. *J Rehabil Med.*  
5  
6 511 2010;42(4):323-331.  
7
- 8  
9 512 **30.** Podsiadlo D, Richardson S. The Timed "Up & Go": A test of basic functional mobility for frail  
10  
11 513 elderly persons. *J Am Geriatr Soc.* 1991;39:142-148.  
12
- 13 514 **31.** Powell LE, Myers AM. The Activities-specific Balance Confidence (ABC) Scale. *J Gerontol A*  
14  
15 515 *Biol Sci Med Sci.* 1995;50A(1):M28-34.  
16  
17
- 18 516 **32.** Washburn RA, Zhu W, McAuley E, Frogley M, Figoni SF. The Physical Activity Scale for  
19  
20 517 Individuals with Physical Disabilities: development and evaluation. *Arch Phys Med Rehabil.*  
21  
22 518 2002;83:193-200.  
23  
24
- 25 519 **33.** Trigg R, Wood VA. The Subjective Index of Physical and Social Outcome (SIPSO): a new  
26  
27 520 measure for use with stroke patients. *Clin Rehabil.* 2000;14(3):288-299.  
28
- 29 521 **34.** Tang Y. Sample size estimation for negative binomial regression comparing rates of recurrent  
30  
31 522 events with unequal follow-up time. *J Biopharm Stat.* 2015;25(5):1100-1113.  
32  
33
- 34 523 **35.** van Duijnhoven HJR, De Kam D, Hellebrand W, Smulders E, Geurts ACH, Weerdesteyn V.  
35  
36 524 Development and process evaluation of a 5-week exercise program to prevent falls in people  
37  
38 525 after stroke: the FALLS program. *Stroke Res Treat.* 2012;2012:407693.  
39  
40
- 41 526 **36.** Bhatt T, Yang F, Pai Y-C. Learning to resist gait-slip falls: long-term retention in community-  
42  
43 527 dwelling older adults. *Arch Phys Med Rehabil.* 2012;93:557-564.  
44
- 45 528 **37.** Batchelor FA, Hill KD, Mackintosh SF, Said CM, Whitehead CH. Effects of a multifactorial  
46  
47 529 falls prevention program for people with stroke returning home after rehabilitation: a  
48  
49 530 randomized controlled trial. *Arch Phys Med Rehabil.* 2012;93(9):1648-1655.  
50  
51  
52  
53  
54  
55  
56  
57  
58  
59  
60

- 1  
2 531 **38.** Mansfield A, Peters AL, Liu BA, Maki BE. Effect of a perturbation-based balance-training  
3  
4 532 program on compensatory stepping and grasping reactions in older adults: a randomized  
5  
6 533 controlled trial. *Phys Ther.* 2010;90(4):476-491.  
7
- 8  
9 534 **39.** Maki BE, McIlroy WE. Postural control in the older adult. *Clin Geriatr Med.* 1996;12(4):635-  
10  
11 535 658.  
12
- 13 536 **40.** Robinson CA, Shumway-Cook A, Matsuda PN, Ciol MA. Understanding physical factors  
14  
15 associated with participation in community ambulation following stroke. *Disabil Rehabil.*  
16 537  
17 2011;33(12):1033-1042.  
18 538  
19
- 20 539 **41.** Nicholson S, Sniehotta FF, van Wijck F, et al. A systematic review of perceived barriers and  
21  
22 motivators to physical activity after stroke. *Int J Stroke.* 2013;8:357-364.  
23 540  
24
- 25 541 **42.** Mudge S, Barber PA, Stott S. Circuit-based rehabilitation improves gait endurance but not usual  
26  
27 542 walking activity in chronic stroke: a randomized controlled trial. *Arch Phys Med Rehabil.*  
28  
29 543 2009;90:1989-1996.  
30
- 31  
32 544 **43.** Morris JH, MacGillivray S, Mcfarlane S. Interventions to promote long-term participation in  
33  
34 545 physical activity after stroke: a systematic review of the literature. *Arch Phys Med Rehabil.*  
35  
36 546 2014;95:956-967.  
37
- 38  
39 547 **44.** Bateni H, Zecevic A, McIlroy WE, Maki BE. Resolving conflicts in task demands during  
40  
41 548 balance recovery: does holding an object inhibit compensatory grasping? *Exp Brain Res.*  
42  
43 549 2004;157:49-58.  
44
- 45  
46 550 **45.** Lamb SE, Jørstad-Stein EC, Hauer K, Becker C. Development of a common outcome data set  
47  
48 551 for fall injury prevention trials: The Prevention of Falls Network Europe consensus. *J Am*  
49  
50 552 *Geriatr Soc.* 2005;53(9):1618-1622.  
51  
52  
53  
54  
55  
56  
57  
58  
59  
60

1  
2  
3  
4  
5  
6  
7  
8  
9  
10  
11  
12  
13  
14  
15  
16  
17  
18  
19  
20  
21  
22  
23  
24  
25  
26  
27  
28  
29  
30  
31  
32  
33  
34  
35  
36  
37  
38  
39  
40  
41  
42  
43  
44  
45  
46  
47  
48  
49  
50  
51  
52  
53  
54  
55  
56  
57  
58  
59  
60

- 553 **46.** Strath SJ, Kaminsky LA, Ainsworth BE, et al. Guide to the assessment of physical activity:  
554 clinical and research applications. A scientific statement from the American Heart Association.  
555 *Circulation*. 2013;128:2259-2279.
- 556 **47.** Craig CL, Marshall AL, Sjöström M, et al. International physical activity questionnaire: 12-  
557 country reliability and validity. *Med Sci Sports Exerc*. 2003;35(8):1381-1395.
- 558 **48.** Marigold DS, Eng JJ, Dawson AS, Inglis JT, Harris JE, Gylfadóttir S. Exercise leads to faster  
559 postural reflexes, improved balance and mobility, and fewer falls in older persons with chronic  
560 stroke. *J Am Geriatr Soc*. 2005;53:416-423.
- 561 **49.** Robinovitch SN, Feldman F, Yang Y, et al. Video capture of the circumstances of falls in  
562 elderly people residing in long-term care: an observational study. *Lancet*. 2013;381(9860):47-  
563 54.

1  
2 567 **TABLES**

3  
4 568 **Table 1: Participant characteristics at study enrolment.** Values presented are medians with  
5  
6 569 interquartile range in parentheses (for continuous/ordinal variables) or number with percentage in  
7  
8 parentheses (for count/frequency variables). The p-value is for the Wilcoxon-Mann-Whitney test  
9 570  
10  
11 571 (continuous/ordinal variables) or Fisher's exact test (count/frequency variables).  
12

|                                   | <b>PBT<br/>(n=41)</b> | <b>Control<br/>(n=42)</b> | <b><i>p-value</i></b> |
|-----------------------------------|-----------------------|---------------------------|-----------------------|
| Age (years)                       | 66 (17)               | 67 (13)                   | 0.84                  |
| Sex (number, %)                   |                       |                           |                       |
| Female                            | 15 (36.6)             | 12 (28.6)                 | 0.49                  |
| Male                              | 26 (63.4)             | 30 (71.4)                 |                       |
| Time post-stroke (years)          | 2.0 (3.3)             | 3.2 (4.5)                 | 0.086                 |
| More affected side (number, %)    |                       |                           |                       |
| Left                              | 22 (53.7)             | 22 (52.4)                 | >0.99                 |
| Right                             | 19 (46.3)             | 20 (47.6)                 |                       |
| NIH-SS (score)                    | 3 (4)                 | 3 (5)                     | 0.57                  |
| CMSA leg (score)                  | 5 (1)                 | 5 (1)                     | 0.54                  |
| CMSA foot (score)                 | 5 (3)                 | 5 (1)                     | 0.45                  |
| ABC scale (%)                     | 65.6 (26.3)           | 79.1 (33.8)               | 0.42                  |
| BBS (score)                       | 50 (10)               | 51 (7)                    | 0.94                  |
| Mini-BEST (score)                 | 18 (7)                | 18 (5)                    | 0.95                  |
| TUG (s)                           | 14.4 (12.3)           | 13.0 (7.6)                | 0.62                  |
| PASIPD (score)                    | 8.4 (9.5)             | 11.6 (10.9)               | 0.48                  |
| SIPSO (score)                     | 30 (9)                | 31 (13)                   | 0.74                  |
| Fall in the past year (number, %) |                       |                           |                       |
| Yes                               | 17 (41.5)             | 18 (42.9)                 | >0.99                 |
| No                                | 24 (58.5)             | 24 (57.1)                 |                       |

39 572 ABC=Activities-specific Balance Confidence scale, BBS=Berg Balance Scale, mini-BEST=mini-  
40  
41 573 Balance Evaluation Systems Test, CMSA=Chedoke-McMaster Stroke Assessment, NIH-SS=National  
42  
43  
44 574 Institutes of Health Stroke Scale; PASIPD=Physical Activity Scale for Individuals with Physical  
45  
46 575 Disabilities, SIPSO=Subjective Index of Physical and Social Outcome.  
47

48 576  
49  
50  
51  
52  
53  
54  
55  
56  
57  
58  
59  
60

**Table 2: Balance and mobility measures between groups.** Values presented are least-square means with 95% confidence intervals in brackets. The p-value is for the ANCOVA comparing groups at each time point, controlling for the baseline value.

|                           | PBT               | Control           | <i>p-value</i> |
|---------------------------|-------------------|-------------------|----------------|
| <b>Post-training</b>      |                   |                   |                |
| N                         | 39                | 38                |                |
| ABC (%)                   | 75.6 [71.6, 79.7] | 78.2 [74.1, 82.2] | 0.97           |
| BBS (score)               | 50.8 [50.0, 51.7] | 51.2 [50.3, 52.1] | 0.99           |
| Mini-BEST (score)         | 20.3 [19.6, 21.0] | 20.1 [19.3, 20.8] | 0.96           |
| BEST-anticipatory (score) | 4.4 [4.2, 4.6]    | 4.4 [4.2, 4.6]    | 0.94           |
| BEST-reactive (score)     | 4.2 [3.7, 4.7]    | 3.6 [3.0, 4.1]    | 0.044          |
| BEST-sensory (score)      | 5.3 [5.2, 5.5]    | 5.6 [5.4, 5.7]    | 0.0084         |
| BEST-gait (score)         | 6.4 [6.0, 6.7]    | 6.6 [6.2, 7.0]    | 0.44           |
| TUG (s)                   | 17.5 [15.8, 19.2] | 17.4 [15.7, 19.1] | 0.30           |
| <b>6-month follow-up</b>  |                   |                   |                |
| N                         | 30*               | 30*               |                |
| ABC (%)                   | 75.4 [70.1, 80.8] | 74.1 [68.6, 79.5] | 0.70           |
| BBS (score)               | 50.2 [49.2, 51.2] | 51.3 [50.3, 52.4] | 0.11           |
| Mini-BEST (score)         | 19.8 [18.9, 20.7] | 19.1 [18.2, 20.0] | 0.81           |
| BEST-anticipatory (score) | 4.3 [4.0, 4.6]    | 4.3 [4.0, 4.6]    | 0.99           |
| BEST-reactive (score)     | 4.0 [3.4, 4.5]    | 2.9 [2.3, 3.4]    | 0.0055         |
| BEST-sensory (score)      | 5.4 [5.1, 5.7]    | 5.4 [5.2, 5.7]    | 0.44           |
| BEST-gait (score)         | 6.2 [5.6, 6.7]    | 6.5 [6.0, 7.1]    | 0.25           |
| TUG (s)                   | 16.8 [15.3, 18.2] | 15.4 [13.9, 16.9] | 0.32           |
| <b>12-month follow-up</b> |                   |                   |                |
| N                         | 27 <sup>†</sup>   | 29 <sup>†</sup>   |                |
| ABC (%)                   | 75.2 [69.3, 81.1] | 78.1 [72.1, 84.0] | 0.95           |
| BBS (score)               | 50.6 [49.5, 51.6] | 51.1 [50.0, 52.1] | 0.27           |
| Mini-BEST (score)         | 20.6 [19.4, 21.8] | 18.7 [17.5, 19.8] | 0.049          |
| BEST-anticipatory (score) | 4.3 [4.0, 4.6]    | 4.3 [3.9, 4.6]    | 0.45           |
| BEST-reactive (score)     | 4.2 [3.6, 4.9]    | 2.6 [2.0, 3.2]    | 0.0013         |
| BEST-sensory (score)      | 5.4 [5.1, 5.7]    | 5.4 [5.1, 5.6]    | 0.64           |
| BEST-gait (score)         | 6.6 [6.0, 7.3]    | 6.5 [5.9, 7.1]    | 0.90           |
| TUG (s)                   | 15.7 [14.3, 17.2] | 17.3 [15.9, 18.7] | 0.79           |

ABC=activities-specific balance confidence scale; BBS=Berg balance scale; BEST=balance evaluation systems test.

\*N=32 PBT and 31 control for the ABC at 6-month follow-up. <sup>†</sup>N=31 PBT and 31 control for the ABC at 12-month follow-up.



1  
2 584 **Table 3: Physical activity and social integration between groups.** Values presented are least-square  
3  
4 585 means with 95% confidence intervals in brackets The p-value is for the ANCOVA comparing groups at  
5  
6 586 each time point, controlling for the baseline value.

|                           | <b>PBT</b>        | <b>Control</b>     | <b><i>p-value</i></b> |
|---------------------------|-------------------|--------------------|-----------------------|
| <b>Post-training</b>      |                   |                    |                       |
| N                         | 39                | 38                 |                       |
| PASIPD (score)            | 12.3 [10.0, 14.6] | 11.2 [8.8, 13.6]   | 0.92                  |
| SIPSO (score)             | 29.8 [28.1, 31.4] | 31.2 [29.5, 32.9]  | 0.29                  |
| <b>2-month follow-up</b>  |                   |                    |                       |
| N                         | 38                | 31                 |                       |
| PASIPD (score)            | 8.6 [6.4, 10.8]   | 9.5 [7.1, 11.9]    | 0.51                  |
| SIPSO (score)             | 29.7 [28.2, 31.2] | 31.5 [29.8, 33.21] | 0.23                  |
| <b>4-month follow-up</b>  |                   |                    |                       |
| N                         | 33                | 34                 |                       |
| PASIPD (score)            | 9.2 [7.3, 11.2]   | 7.8 [5.9, 9.8]     | 0.34                  |
| SIPSO (score)             | 30.0 [28.2, 31.9] | 30.2 [28.4, 32.0]  | 0.62                  |
| <b>6-month follow-up</b>  |                   |                    |                       |
| N                         | 32                | 31*                |                       |
| PASIPD (score)            | 11.3 [7.3, 15.3]  | 10.9 [6.8, 15.0]   | 0.21                  |
| SIPSO (score)             | 30.3 [29.0, 31.6] | 32.6 [31.3, 33.9]  | 0.012                 |
| <b>8-month follow-up</b>  |                   |                    |                       |
| N                         | 31                | 26                 |                       |
| PASIPD (score)            | 7.0 [5.6, 8.4]    | 6.9 [5.4, 8.5]     | 0.61                  |
| SIPSO (score)             | 30.5 [29.3, 31.7] | 32.3 [31.0, 33.6]  | 0.037                 |
| <b>10-month follow-up</b> |                   |                    |                       |
| N                         | 32                | 32                 |                       |
| PASIPD (score)            | 7.0 [5.5, 8.5]    | 8.2 [6.7, 9.7]     | 0.16                  |
| SIPSO (score)             | 29.9 [28.4, 31.3] | 32.3 [30.9, 33.8]  | 0.031                 |
| <b>12-month follow-up</b> |                   |                    |                       |
| N                         | 31                | 31                 |                       |
| PASIPD (score)            | 11.1 [7.4, 14.8]  | 10.1 [6.4, 13.9]   | 0.27                  |
| SIPSO (score)             | 30.6 [29.1, 32.0] | 32.6 [31.1, 34.0]  | 0.047                 |

43 587 PASIPD=physical activity scale for individuals with physical disabilities; SIPSO=subjective index of  
44  
45 588 physical and social outcome

47 589 \*N=30 control for the SIPSO

**Table 4: Between-group comparison of fall circumstances.** Values are the number of falls in each category, with the percentage of falls in parentheses. The percentage was calculated from the total number of falls for which information was available (i.e., “do not recall” responses were excluded from the denominator). Percentages might not sum to 100 due to rounding error. The p-value is for Fisher’s exact test comparing the two groups, excluding “do not recall” responses from analysis.

|                                                   | <b>PBT<br/>(53 falls)</b> | <b>Control<br/>(64 falls)</b> | <b><i>p-value</i></b> |
|---------------------------------------------------|---------------------------|-------------------------------|-----------------------|
| <b>Cause of fall</b>                              |                           |                               |                       |
| Do not recall                                     | 8                         | 6                             |                       |
| Slip                                              | 16 (35.6)                 | 22 (37.9)                     | 0.26                  |
| Trip                                              | 11 (24.4)                 | 6 (10.3)                      |                       |
| Push/external force                               | 1 (2.2)                   | 3 (5.2)                       |                       |
| Incorrect weight transfer <sup>49</sup>           | 17 (37.8)                 | 13 (46.6)                     |                       |
| <b>Posture at the time of the fall</b>            |                           |                               |                       |
| Do not recall                                     | 7                         | 4                             |                       |
| Lying                                             | 1 (2.2)                   | 0 (0)                         | 0.33                  |
| Sitting                                           | 4 (8.9)                   | 7 (12.1)                      |                       |
| Standing                                          | 9 (20.0)                  | 6 (10.3)                      |                       |
| Walking                                           | 32 (68.9)                 | 47 (77.6)                     |                       |
| <b>Motor activity at the time of the fall</b>     |                           |                               |                       |
| Do not recall                                     | 7                         | 4                             |                       |
| Not moving                                        | 4 (8.9)                   | 2 (3.5)                       | 0.010                 |
| Transferring                                      | 2 (4.4)                   | 12 (20.7)                     |                       |
| Turning/reaching/bending                          | 10 (22.2)                 | 3 (5.2)                       |                       |
| Walking on level surface                          | 18 (37.8)                 | 20 (34.5)                     |                       |
| Walking on ramp/stairs/uneven surface             | 12 (26.7)                 | 21 (36.2)                     |                       |
| <b>Cognitive activity at the time of the fall</b> |                           |                               |                       |
| Do not recall                                     | 10                        | 9                             |                       |
| None                                              | 34 (78.6)                 | 44 (81.1)                     | 0.80                  |
| Distracted                                        | 9 (21.4)                  | 11 (18.9)                     |                       |
| <b>Where did the fall occur</b>                   |                           |                               |                       |
| Outdoors                                          | 19 (35.8)                 | 22 (34.4)                     | >0.99                 |
| Indoors                                           | 34 (64.2)                 | 12 (65.6)                     |                       |
| <b>Using an assistive device</b>                  |                           |                               |                       |
| Do not recall                                     | 7                         | 5                             |                       |
| Never use one                                     | 11                        | 21                            |                       |
| No                                                | 16 (45.7)                 | 24 (66.7)                     | 0.096                 |
| Yes                                               | 19 (54.3)                 | 12 (33.3)                     |                       |
| <b>Holding onto a handrail</b>                    |                           |                               |                       |
| Do not recall                                     | 7                         | 6                             |                       |
| No                                                | 41 (89.1)                 | 48 (82.8)                     | 0.41                  |
| Yes                                               | 5 (10.9)                  | 10 (17.2)                     |                       |

|                                               | <b>PBT<br/>(53 falls)</b> | <b>Control<br/>(64 falls)</b> | <i>p-value</i> |
|-----------------------------------------------|---------------------------|-------------------------------|----------------|
| Anything in hands                             |                           |                               |                |
| Do not recall                                 | 9                         | 6                             |                |
| No                                            | 34 (77.3)                 | 32 (55.2)                     | 0.023          |
| Yes (one or both hands)                       | 10 (22.7)                 | 26 (44.8)                     |                |
| Action to try to prevent the fall             |                           |                               |                |
| Do not recall                                 | 9                         | 18                            |                |
| None                                          | 27 (61.4)                 | 28 (60.9)                     | 0.18           |
| Grasp                                         | 8 (18.2)                  | 14 (30.4)                     |                |
| Step or step + grasp                          | 9 (20.5)                  | 4 (8.7)                       |                |
| Length of lie on floor or ground              |                           |                               |                |
| Do not recall                                 | 7                         | 4                             |                |
| A few minutes or less                         | 39 (84.8)                 | 57 (95.0)                     | 0.098          |
| More than a few minutes but less than an hour | 7 (15.2)                  | 3 (5.0)                       |                |
| Assistance required to get up from fall       |                           |                               |                |
| Do not recall                                 | 7                         | 4                             |                |
| No                                            | 24 (52.2)                 | 44 (73.3)                     | 0.040          |
| Yes                                           | 22 (47.8)                 | 16 (26.7)                     |                |
| Injuries                                      |                           |                               |                |
| Do not recall                                 | 7                         | 5                             |                |
| None                                          | 28 (60.9)                 | 39 (66.1)                     | 0.68*          |
| Cuts or bruises                               | 17 (37.0)                 | 19 (32.2)                     |                |
| Joint sprain or dislocation                   | 1 (2.2)                   | 1 (1.7)                       |                |
| Medical assistance required after fall        |                           |                               |                |
| Do not recall                                 | 7                         | 5                             |                |
| No injuries                                   | 30                        | 42                            |                |
| Injured but did not seek treatment            | 16 (100)                  | 14 (82.4)                     | 0.23†          |
| Saw other healthcare professional             | 0 (0)                     | 1 (5.9)                       |                |
| Treated in hospital emergency room            | 0 (0)                     | 2 (11.8)                      |                |

\*Analysis compared injury vs no injury

†Analysis compared sought treatment vs did not seek treatment

598

1  
2 599 **FIGURE CAPTIONS**  
3

4 600 **Figure 1: Participant flow through the study.** Eight participants who consented to participate in the  
5  
6 601 study were excluded on the initial assessment because they could not tolerate the lean-and-release  
7  
8  
9 602 postural perturbations. Participants were withdrawn after randomization because it became apparent  
10  
11 603 that they did not meet the study criteria (1 PBT participant had osteoporosis with history of fracture,  
12  
13 604 and 1 control participant had uncontrolled hypertension), or because they had a significant decline in  
14  
15  
16 605 health during the training portion of the study (1 PBT and 1 control participant). One PBT participant  
17  
18 606 was withdrawn from the study because she did not like the group allocation. Therefore, there were 42  
19  
20 607 control participants and 41 PBT participants available for analysis of the primary outcome (falls in  
21  
22  
23 608 daily life). Participants withdrew during the 12-month follow-up period because they: no longer wished  
24  
25 609 to be in the study (2 PBT, 1 control); experienced a serious adverse event (2 PBT, 5 control); were lost  
26  
27 610 to follow-up (2 PBT, 3 control); or enrolled in a conflicting study (2 PBT).  
28

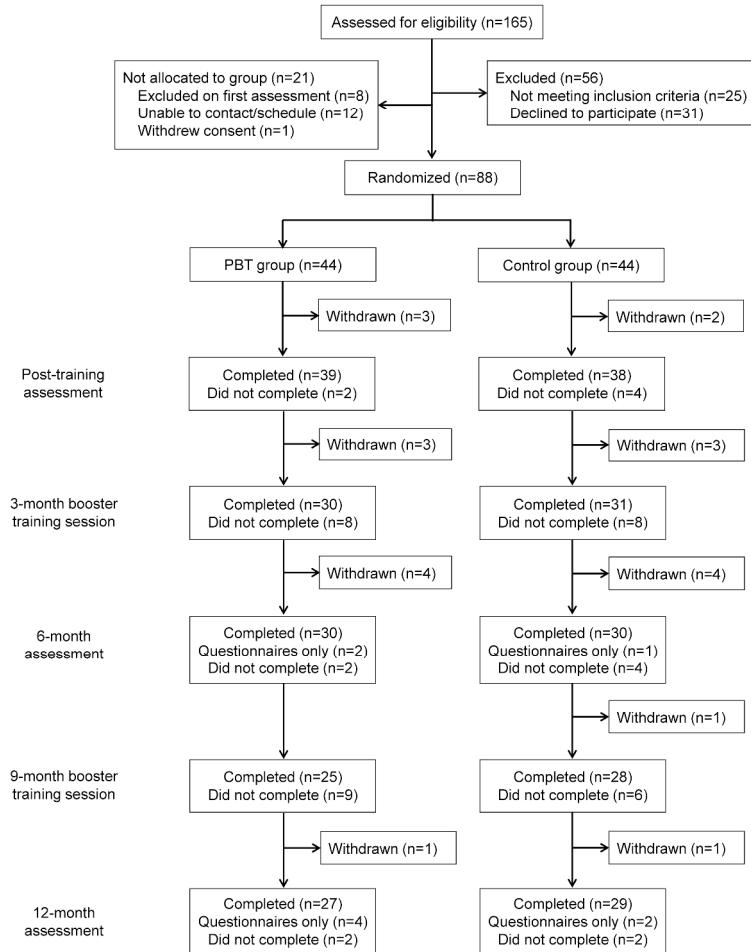

Figure 1: Participant flow through the study. Eight participants who consented to participate in the study were excluded on the initial assessment because they could not tolerate the lean-and-release postural perturbations. Participants were withdrawn after randomization because it became apparent that they did not meet the study criteria (1 PBT participant had osteoporosis with history of fracture, and 1 control participant had uncontrolled hypertension), or because they had a significant decline in health during the training portion of the study (1 PBT and 1 control participant). One PBT participant was withdrawn from the study because she did not like the group allocation. Therefore, there were 42 control participants and 41 PBT participants available for analysis of the primary outcome (falls in daily life). Participants withdrew during the 12-month follow-up period because they: no longer wished to be in the study (2 PBT, 1 control); experienced a serious adverse event (2 PBT, 5 control); were lost to follow-up (2 PBT, 3 control); or enrolled in a conflicting study (2 PBT).

300x400mm (300 x 300 DPI)

1  
2  
3  
4  
5  
6  
7  
8  
9  
10  
11  
12  
13  
14  
15  
16  
17  
18  
19  
20  
21  
22  
23  
24  
25  
26  
27  
28  
29  
30  
31  
32  
33  
34  
35  
36  
37  
38  
39  
40  
41  
42  
43  
44  
45  
46  
47  
48  
49  
50  
51  
52  
53  
54  
55  
56  
57  
58  
59  
60

For peer review only

1  
2  
3  
4  
5  
6  
7  
8  
9

## SUPPLEMENTARY TABLES

**Table S1: Balance and mobility measures, change over time.** Values presented are the differences from pre-training with 95% confidence intervals in brackets. A positive difference value indicates an improvement for all variables except the TUG, where a negative value indicates an improvement (i.e., faster TUG time compared to baseline).

|                           | PBT              | Control          |
|---------------------------|------------------|------------------|
| <b>Post-training</b>      |                  |                  |
| N                         | 39               | 38               |
| ABC (%)                   | 5.2 [0.7, 9.8]   | 6.6 [1.5, 11.6]  |
| BBS (score)               | 1.8 [0.7, 2.9]   | 1.9 [1.0, 2.9]   |
| Mini-BEST (score)         | 2.6 [1.8, 3.4]   | 2.2 [1.5, 3.0]   |
| BEST-anticipatory (score) | 0.5 [0.2, 0.8]   | 0.5 [0.2, 0.8]   |
| BEST-reactive (score)     | 1.5 [0.9, 2.1]   | 0.8 [0.3, 1.2]   |
| BEST-sensory (score)      | 0 [-0.2, 0.2]    | 0.3 [0.0, 0.5]   |
| BEST-gait (score)         | 0.6 [0.1, 1.0]   | 0.7 [0.3, 1.1]   |
| TUG (s)                   | -1.0 [-2.9, 0.8] | -1.1 [-2.8, 0.5] |
| <b>6-month follow-up</b>  |                  |                  |
| N                         | 30*              | 30*              |
| ABC (%)                   | 3.5 [-2.3, 9.2]  | 0.6 [-5.2, 6.3]  |
| BBS (score)               | 0.3 [-0.8, 1.4]  | 1.3 [0.2, 2.4]   |
| Mini-BEST (score)         | 1.6 [0.6, 2.6]   | 0.8 [-0.1, 1.7]  |
| BEST-anticipatory (score) | 0.3 [-0.1, 0.6]  | 0.3 [-0.1, 0.7]  |
| BEST-reactive (score)     | 1.2 [0.5, 1.8]   | 0.0 [-0.5, 0.5]  |
| BEST-sensory (score)      | 0.1 [-0.2, 0.3]  | 0.2 [-0.1, 0.5]  |
| BEST-gait (score)         | 0.1 [-0.6, 0.8]  | 0.3 [-0.1, 0.8]  |
| TUG (s)                   | 1.0 [-1.0, 2.9]  | -0.5 [-1.4, 0.5] |
| <b>12-month follow-up</b> |                  |                  |
| N                         | 27†              | 29†              |
| ABC (%)                   | 3.5 [-3.1, 10.2] | 3.8 [-2.7, 10.3] |
| BBS (score)               | 0.6 [-0.7, 1.8]  | 0.8 [-0.3, 2.0]  |
| Mini-BEST (score)         | 2.2 [0.9, 3.4]   | 0.1 [-1.1, 1.4]  |
| BEST-anticipatory (score) | 0.2 [-0.1, 0.5]  | 0.2 [-0.2, 0.7]  |
| BEST-reactive (score)     | 1.4 [0.5, 2.3]   | -0.4 [-1.0, 0.2] |
| BEST-sensory (score)      | 0.1 [-0.2, 0.4]  | 0.1 [-0.1, 0.4]  |
| BEST-gait (score)         | 0.4 [-0.3, 1.2]  | 0.2 [-0.4, 0.8]  |
| TUG (s)                   | 0.1 [-1.0, 1.2]  | 1.6 [-0.4, 3.6]  |

ABC=activities-specific balance confidence scale; BBS=Berg balance scale; BEST=balance evaluation systems test.

\*N=32 PBT and 31 control for the ABC at 6-month follow-up. †N=31 PBT and 31 control for the ABC at 12-month follow-up.

**Table S2: Physical activity and social integration, change over time.** Values presented are the difference from pre-training with 95% confidence intervals in brackets. A positive difference value indicates an improvement.

|                           | <b>PBT</b>        | <b>Control</b>    |
|---------------------------|-------------------|-------------------|
| <b>Post-training</b>      |                   |                   |
| N                         | 39                | 38                |
| PASIPD (score)            | 1.1 [-2.0, 4.2]   | -1.0 [-3.1, 1.0]  |
| SIPSO (score)             | 0.5 [-1.4, 2.5]   | 1.8 [0.0, 3.7]    |
| <b>2-month follow-up</b>  |                   |                   |
| N                         | 38                | 31                |
| PASIPD (score)            | -2.1 [-5.1, 0.8]  | -2.8 [-5.8, 0.3]  |
| SIPSO (score)             | -0.1 [-1.7, 1.6]  | 1.5 [-0.4, 3.4]   |
| <b>4-month follow-up</b>  |                   |                   |
| N                         | 33                | 34                |
| PASIPD (score)            | -1.7 [-4.2, 0.8]  | -4.1 [-6.6, -1.5] |
| SIPSO (score)             | 0.5 [-1.2, 2.2]   | 0.7 [-1.3, 2.7]   |
| <b>6-month follow-up</b>  |                   |                   |
| N                         | 32                | 31*               |
| PASIPD (score)            | 0.4 [-5.3, 6.2]   | -2.2 [-5.6, 1.1]  |
| SIPSO (score)             | 0.3 [-1.0, 1.7]   | 2.5 [0.8, 4.2]    |
| <b>8-month follow-up</b>  |                   |                   |
| N                         | 31                | 26                |
| PASIPD (score)            | -4.5 [-7.3, -1.6] | -5.7 [-9.7, -1.6] |
| SIPSO (score)             | 0.2 [-1.1, 1.5]   | 1.8 [0.4, 3.3]    |
| <b>10-month follow-up</b> |                   |                   |
| N                         | 32                | 32                |
| PASIPD (score)            | -4.1 [-6.6, -1.7] | -3.5 [-6.7, -0.4] |
| SIPSO (score)             | -0.3 [-1.6, 1.0]  | 2.2 [0.4, 3.9]    |
| <b>12-month follow-up</b> |                   |                   |
| N                         | 31                | 31                |
| PASIPD (score)            | 0.4 [-4.6, 5.4]   | -2.9 [-6.0, 0.2]  |
| SIPSO (score)             | 0.8 [-0.7, 2.3]   | 2.7 [0.9, 4.4]    |

PASIPD=physical activity scale for individuals with physical disabilities; SIPSO=subjective index of physical and social outcome

\*N=30 control for the SIPSO



1  
2  
3  
4  
5  
6  
7  
8  
9  
10  
11  
12  
13  
14  
15  
16  
17  
18  
19  
20  
21  
22  
23  
24  
25  
26  
27  
28  
29  
30  
31  
32  
33  
34  
35  
36  
37  
38  
39  
40  
41  
42  
43  
44  
45  
46  
47  
48  
49  
50  
51  
52  
53  
54  
55  
56  
57  
58  
59  
60

# Toronto Perturbation-Based Balance Training

## Program Manual

For peer review only

Program developed and manual written by: Avril Mansfield, Vincent DePaul, Cynthia Danells, Elizabeth Inness, Louis Biasin, Vivien Poon, and Svetlana Knorr

For further information, please contact: [avril.mansfield@uhn.ca](mailto:avril.mansfield@uhn.ca)

**Table of contents**

|                                              |    |
|----------------------------------------------|----|
| Acknowledgements .....                       | 2  |
| List of abbreviations .....                  | 3  |
| Introduction .....                           | 4  |
| 1. Screening and assessment .....            | 5  |
| 2. Planning the program .....                | 10 |
| 3. The program .....                         | 12 |
| 4. Perturbation training log .....           | 14 |
| 5. Task descriptions .....                   | 44 |
| 6. Rating of perceived challenge scale ..... | 59 |

## **ACKNOWLEDGEMENTS**

The program described within this manual was developed by Avril Mansfield, Vince DePaul, Elizabeth Inness, Cynthia Danells, Louis Biasin, Vivien Poon, and Svetlana Knorr, who are research and clinical staff affiliated with the Toronto Rehabilitation Institute (AM, VDP, EI, CD, LB, VP, and SK), Sunnybrook Research Institute (AM), the University of Toronto (AM, EI, CD, LB, VP, and SK), and Queen's University at Kingston (VDP). The work described within this manual is supported by the Canadian Institute of Health Research (MOP-133577 and MSH-141983), the Heart and Stroke Foundation Canadian Partnership for Stroke Recovery, and the Ministry of Research and Innovation. We also acknowledge the support of Toronto Rehabilitation Institute. Equipment and space have been funded with grants from the Canada Foundation for Innovation, Ontario Innovation Trust, and the Ministry of Research and Innovation.

We thank Cynthia Campos, who provided illustrations, and Luigi Bianchi, who agreed to be photographed for the manual.

**LIST OF ABBREVIATIONS**

AFO = ankle-foot orthosis  
BOS = base of support  
BP = blood pressure  
CMSA = Chedoke-McMaster Stroke Assessment  
DF = dorsiflexion  
EV = eversion  
HR = heart rate  
INV = inversion  
Mini-BES = Mini Balance Evaluation Systems (test)  
PBT = perturbation-based balance training  
PF = plantarflexion  
RPC = rating of perceived challenge  
TUG = timed-up and go

## **INTRODUCTION**

The **goal of PBT** is to improve reactive balance control in order to optimize safe independent mobility. The program requires that individuals repeatedly experience loss of balance (i.e., internal or manual postural perturbations) and are provided the opportunity to practice stepping reactions to regain balance following this instability. As participants adapt to the challenge and improve their balance control, the challenge should be increased. Challenge can be increased by increasing the magnitude of the manual perturbation, adding more challenging secondary movement and cognitive tasks, removing or altering sensory feedback, and changing the environment.

Note, for convenience and clarity of expression in this document, we use feminine pronouns to refer to the treating physiotherapist, and masculine pronouns to refer to the participant.

For peer review only

## **I. SCREENING AND ASSESSMENT**

### **I.1 An initial assessment is required to inform and guide treatment, and ensure patient safety.**

Information regarding significant medical history is obtained; specifically, does the participant:

- Have arthritis in the lower extremities or any other joint pain;
- Normally wear glasses or contact lenses;
- Normally use a cane, a rollator, or any other mobility aid;
- Normally wear an orthotic (brace) around the ankle and/or knee;
- Normally wear a sling around the arm/shoulder;
- Have diabetes;
- Take any medication on an “as needed” basis (i.e., PRN medication);
- Report any recent falls; and
- Have fear of falling?

Modifications to the manner in which the program is provided may be made based on responses to the questions above. For example, some activities might be avoided to prevent exacerbation of a previous injury.

The initial assessment includes:

- Assessment of reactive stepping using
  - Forward-fall lean-and-release perturbations under two conditions: usual response and encouraged use (5 trials per condition); and
  - Observation of reactions in the ‘Reactive’ component of the mini-Balance Evaluation Systems (mini-BES) test.
- Consideration of some of the contributors to impaired reactive stepping:
  - Stroke severity/stroke symptoms – e.g., using the National Institutes of Health Stroke Scale;
  - Stage of motor recovery – e.g., using the Chedoke McMaster Stroke Assessment (CMSA);
  - Balance confidence – e.g., using the Activity-specific Balance Confidence scale; and
  - Sensation (see Sections 1.4 and 1.5).

### **I.2 Lean and release assessment instructions.**

Control of reactive stepping following a postural perturbation is assessed using a lean-and-release system. Participants wear a safety harness attached to an overhead support system. The harness is also connected at the back to a beam via a quick-release mechanism (i.e., a modified crossbow trigger). The participant must lean forward from the ankles far such that approximately 10% of his body weight supported by the cable. Once achieved, the cable is released creating a forward fall from which the participant needs to recover. He is instructed step as quickly as possible to regain balance and come to stable stance. If he cannot regain stability independently, then the assessor can aid in the recovery and prevent a ‘fall’ (i.e., being caught by the safety harness).

Two conditions are assessed and recorded on the score sheet (see Section 1.3) – the ‘usual response’ and the ‘encouraged use’. The first five trials are completed as described above and the limb that

1  
2 responds first to the release is recorded. This is the **'usual response'**. If the same limb responds  
3  $\geq 4/5$  times, this is considered to be the **'preferred limb'**. In the **'encouraged use'** condition, five  
4 trials are completed with the preferred limb blocked and the participant is instructed to attempt to  
5 react with the non-preferred limb. The blocking is accomplished with the hand or foot of the  
6 physiotherapist/assessor. If it appears that the participant is going to step with the blocked limb, the  
7 hand/foot can be removed quickly, but the participant is not told that the block will be removed. If  
8 there is no obvious preferred limb (i.e., participant stepped 3 times with one leg and 2 with the  
9 other), then the limb that is blocked should alternate 2 times for one limb and 3 for the other.  
10  
11

12 The lean-and-release assessment is video-recorded and the video is reviewed later to observe any  
13 participant-specific impairments in reactive stepping (see also Section 4). While it might be possible to  
14 observe some obvious impairments in 'real time', often the reaction happens so quickly that this is not  
15 possible.  
16  
17

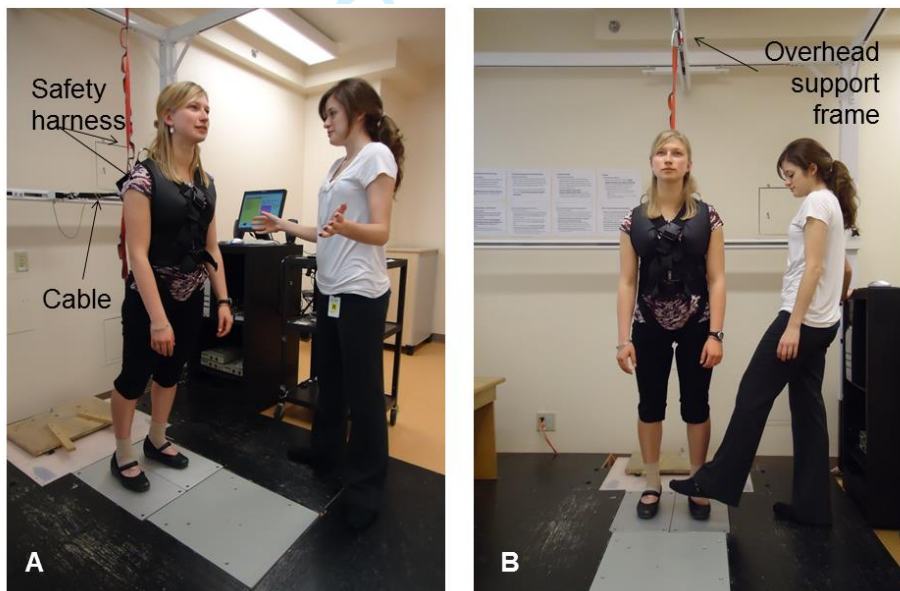

**Figure 1.1: The lean-and-release system.** Panel A (left) shows the usual response condition. Panel B (right) shows the encouraged-use condition. Figure taken from Mansfield et al., BMC Neurol. 2015;15:87

### 1.3 Lean and release collection sheet.

#### Usual response

- Participant wearing harness
- Aim for 10% body weight on the cable
- Random delay between 'ready' signal and perturbation
- Review video to determine preferred limb & assists (if not clear during testing)
- Record limb for first step

| Test | Trial # | Comments | Limb                                                            | Assist                                                      |
|------|---------|----------|-----------------------------------------------------------------|-------------------------------------------------------------|
| 1    |         |          | <input type="checkbox"/> Right<br><input type="checkbox"/> Left | <input type="checkbox"/> No<br><input type="checkbox"/> Yes |
| 2    |         |          | <input type="checkbox"/> Right<br><input type="checkbox"/> Left | <input type="checkbox"/> No<br><input type="checkbox"/> Yes |
| 3    |         |          | <input type="checkbox"/> Right<br><input type="checkbox"/> Left | <input type="checkbox"/> No<br><input type="checkbox"/> Yes |
| 4    |         |          | <input type="checkbox"/> Right<br><input type="checkbox"/> Left | <input type="checkbox"/> No<br><input type="checkbox"/> Yes |
| 5    |         |          | <input type="checkbox"/> Right<br><input type="checkbox"/> Left | <input type="checkbox"/> No<br><input type="checkbox"/> Yes |

Preferred limb (initiated stepping in  $\geq 4/5$  trials with this limb):

- Right
- Left
- No clear preference

#### Encouraged use

- Block preferred limb with researchers hand/foot; if no limb preference do two trials blocking one limb and three blocking the other
- Aim for 10% body weight on the cable
- Random delay between 'ready' signal and perturbation
- Review video to determine preferred limb & assists (if not clear during testing)
- Record limb for first step

| Test | Trial # | Comments | Limb                                                            | Assist                                                      |
|------|---------|----------|-----------------------------------------------------------------|-------------------------------------------------------------|
| 6    |         |          | <input type="checkbox"/> Right<br><input type="checkbox"/> Left | <input type="checkbox"/> No<br><input type="checkbox"/> Yes |
| 7    |         |          | <input type="checkbox"/> Right<br><input type="checkbox"/> Left | <input type="checkbox"/> No<br><input type="checkbox"/> Yes |
| 8    |         |          | <input type="checkbox"/> Right<br><input type="checkbox"/> Left | <input type="checkbox"/> No<br><input type="checkbox"/> Yes |
| 9    |         |          | <input type="checkbox"/> Right<br><input type="checkbox"/> Left | <input type="checkbox"/> No<br><input type="checkbox"/> Yes |
| 10   |         |          | <input type="checkbox"/> Right<br><input type="checkbox"/> Left | <input type="checkbox"/> No<br><input type="checkbox"/> Yes |



#### 1.4 Sensation assessment instructions.

Exteroceptive and proprioceptive sensation are assessed in the affected foot and ankle. It is necessary to know if the participant appreciates light touch and movement of the ankle and foot. If these are absent or decreased, steps should be taken to accommodate the deficits in order to minimize potential injury due to PBT.

Sensation is assessed with the participant sitting on a raised plinth, feet dangling, with shoes and socks removed. Demonstration of the test should be done with the participant's eyes open and administered to the less-affected foot/ankle. The actual test should be administered to the more-affected foot/ankle following the demonstration with the participant's eyes closed.

**Light touch** is assessed using a cotton ball; the cotton ball should lightly touch but not brush the sole of the participant's foot. The foot is touched 5 times and the participant is instructed to respond when the touch is felt. Responses are recorded on the score sheet (see Section 1.5). If there is no response (and you are certain that the participant understood the instructions) this is recorded as a negative response.

The **perception of joint movement** is assessed in the ankle (dorsiflexion and plantar flexion) and in the foot (inversion and eversion). The participant's foot is held in two places: the bony prominences of the first and fifth meta-tarsal phalangeal joints and at the medial and lateral malleoli. Movements of the ankle should be demonstrated on the less-affected side as "up" for dorsiflexion and "down" for plantar flexion and, of the foot, as "in" for inversion and "out" for eversion. Care should be taken not to change the pressure of the hold during the movement. When being tested, movements should be through small ranges and time should be allowed for the participant to respond. If the participant is unsure of the direction of the movement, the range should be increased. If the participant is still unsure, then this is a negative response for the test. Five movements should be tested at the ankle and five at the foot.

Each correct, incorrect, or absent response is recorded on the score sheet (Section 1.5). If the participant scores <4/5 for light touch appreciation, and/or <8/10 for joint movement perception, then consideration is made for use of an Aircast Airport Ankle Brace during training.

## 1.5 Sensation assessment collection sheet.

### Position recognition

| Position       | Correct response?            |
|----------------|------------------------------|
| Dorsiflexion   | <input type="checkbox"/> Yes |
|                | <input type="checkbox"/> No  |
| Plantarflexion | <input type="checkbox"/> Yes |
|                | <input type="checkbox"/> No  |
| Dorsiflexion   | <input type="checkbox"/> Yes |
|                | <input type="checkbox"/> No  |
| Dorsiflexion   | <input type="checkbox"/> Yes |
|                | <input type="checkbox"/> No  |
| Plantarflexion | <input type="checkbox"/> Yes |
|                | <input type="checkbox"/> No  |
| Number correct |                              |

| Position       | Correct response?            |
|----------------|------------------------------|
| Inversion      | <input type="checkbox"/> Yes |
|                | <input type="checkbox"/> No  |
| Eversion       | <input type="checkbox"/> Yes |
|                | <input type="checkbox"/> No  |
| Inversion      | <input type="checkbox"/> Yes |
|                | <input type="checkbox"/> No  |
| Eversion       | <input type="checkbox"/> Yes |
|                | <input type="checkbox"/> No  |
| Eversion       | <input type="checkbox"/> Yes |
|                | <input type="checkbox"/> No  |
| Number correct |                              |

If number correct is <8/10, an AirSport ankle brace should be used to prevent injury during PBT.

### Light touch sensation

| Trial          | Correct response?            |
|----------------|------------------------------|
| Trial 1        | <input type="checkbox"/> Yes |
|                | <input type="checkbox"/> No  |
| Trial 2        | <input type="checkbox"/> Yes |
|                | <input type="checkbox"/> No  |
| Trial 3        | <input type="checkbox"/> Yes |
|                | <input type="checkbox"/> No  |
| Trial 4        | <input type="checkbox"/> Yes |
|                | <input type="checkbox"/> No  |
| Trial 5        | <input type="checkbox"/> Yes |
|                | <input type="checkbox"/> No  |
| Number correct |                              |

If number correct is <4/5, an AirSport ankle brace should be used to prevent injury during PBT.

## **2. PLANNING THE PROGRAM**

### **2.1 The program is individualized to the participant's specific impairments in reactive balance control**

In order to create an effective training program, consideration is made of the participant's unique areas of dyscontrol (identified on initial assessment; see Section 1). Section 4 (Perturbation Training Log) outlines areas of dyscontrol and suggested treatment approaches for each problem. The principle of individual differences considers an individual's response to exercise. Therefore, progression should be gradual and systematic and occur at the individual participant's rate of improvement. Task difficulty is not absolute and could vary from participant-to-participant depending on specific control problems and other deficits.

### **2.2 List of equipment**

The following equipment is required for this specific program:

- Overhead harness support track;
- Fall-arrest approved safety harness;
- Equipment for task-specific activities:
  - Thin foam mat (e.g., thickness of yoga mat or 2.5 cm gym mat);
  - Thick foam pad (dense blue foam);
  - Hand ball (2 sizes; e.g., 10 cm diameter and tennis ball);
  - Soccer ball;
  - Steps (10 cm and 20 cm high);
  - Stop watch;
  - Unstable 'step' (if an unstable step is not available, place a regular step on a thin foam mat);
  - Cross marked out in tape on the floor (2 pieces of tape each at least 60 cm long placed to intersect at right angles (see Figure 6.24);
  - Set of 6 – 23 cm diameter multi-colored Agility Dots;
  - Foam obstacles (e.g., pool noodles or half-round foam rollers); and
- Participant-specific equipment (e.g., walking aid, ankle brace/orthosis, helmet, arm sling).

### **2.3 Ensuring safety during training**

#### **2.3.1 Safety harness**

Participants wear a safety harness attached to an overhead track at all times to prevent a fall to the ground. However, the harness system should be used as a back-up; the supervising physiotherapist still intervenes and provides physical assistance to 'brake the fall' when she feels the individual will not be able to recover balance. (Note, to allow participants the opportunity to practice stepping reactions, the physiotherapist **only** provides hands-on assistance if the participant is unable to regain stability alone.) The harness can prevent a fall to the floor but cannot prevent all possible injuries. Appropriate selection of participants, consideration of their underlying impairments, and appropriate supervision is still required. For example, it is possible that an individual could experience an ankle sprain while stepping in response to a perturbation (see Section 2.3.2). It is also possible that a frail individual who falls completely into the harness will experience an injury (e.g., bruise) because he is caught by the safety harness; a fracture could also be possible with a participant who has very low

1  
2 bone mineral density. Participants should not be left 'dangling' in the safety harness as the straps can  
3 restrict circulation.  
4

### 5 **2.3.2 Protective equipment for ankle**

6  
7 An ankle-foot orthosis (AFO; if prescribed) or an Aircast AirSport Ankle Brace is used during PBT if  
8 the participant meets one or more of the following criteria:  
9

- 10 • Participant typically uses an AFO during home and/or community walking;
- 11 • CMSA foot score is stage 3 or lower;
- 12 • Ankle joint position sense score is <8/10 (see Section 1.4 and 1.5);
- 13 • Light touch sensation of the plantar surface of the foot score is <4/5 (see Section 1.4 and 1.5);
- 14 and/or
- 15 • The treating physiotherapist feels this is necessary to preserve stability of the ankle joint and
- 16 prevent injury.  
17  
18

19 Use of the AirSport Ankle Brace, AFO, or any other assistive devices should be documented in the  
20 Perturbation Training Log (Section 4).  
21  
22

### 23 **2.3.3 Monitoring heart rate and blood pressure**

24  
25 Heart rate (HR) and blood pressure (BP) are taken from the less affected arm using an automatic BP  
26 cuff. The less-affected arm is repositioned in an extended position resting on a table slightly below the  
27 level of the heart. If BP and/or HR fall outside of an 'acceptable' range (systolic BP is outside 90-140  
28 mmHg; diastolic BP is outside 60-90 mmHg; or, HR is outside 60-100 bpm), a second measure is  
29 obtained. If the values continue to be outside of the range, the participant is asked to sit quietly for 5  
30 minutes and perhaps, take a few deep breaths or drink a glass of water, before taking a third  
31 measurement. Participants with HR/BP measurements outside of the acceptable range are also  
32 questioned regarding recent medications (what they have taken and when, or if they have not taken  
33 their usual medications), when they last had something to eat/drink, and if the recently took caffeine,  
34 exercised, or smoked. The decision to continue or terminate the session is made by the  
35 physiotherapist considering factors such as the participants' usual resting HR/BP, how far the  
36 measured values are outside of the acceptable range, the participants' usual medication (e.g., beta-  
37 blockers), and the participants' perception of how they are feeling. If the visit is terminated, the  
38 physiotherapist may advise that the participant follow-up with his primary care physician. If the visit  
39 continues, the physiotherapist may choose to monitor HR and BP regularly throughout the visit and  
40 observe cardiovascular responses to exercise.  
41  
42  
43  
44  
45  
46  
47  
48  
49  
50  
51  
52  
53  
54  
55  
56  
57

### **3. THE PROGRAM**

#### **3.1 Overview**

The PBT program involves 12 1-hour training sessions provided 2 times per week for 6 weeks. Each session is 60 minutes in length and is provided in a one-to-one format. This core program is modified to fit with delivery of in-patient rehabilitation to allow for evaluation among individuals with sub-acute stroke.

Sessions begin with a 10-minute warm-up and end with a 10-minute cool-down following the warm-up and cool-down from the Keep Moving with Stroke program. Each session involves a minimum of ten 'voluntary' tasks that are each practiced for about 2 minutes. Once the participant is comfortable doing the task, the physiotherapist provides a manual perturbation to cause the participant to lose balance with the intent of evoking a reactive step (see Section 3.3). Six external perturbations are provided per task such that there are 60 external perturbations per session; however, fewer perturbations may be performed if participant tolerance is low. Participants might also experience a loss of balance (i.e., internal perturbation) due to failure to properly control balance during the voluntary task. Intensity of the session is determined by participant response; the participant should successfully regain stability with 1 or 2 steps and no assistance from the physiotherapist or safety harness 50% of the time. If the participant is too 'successful', the level of challenge is increased, or vice versa.

#### **3.2 Voluntary Tasks**

Each session involves 'voluntary' tasks that progress along a mobility continuum to evoke internal perturbations (i.e., loss of balance or self-destabilization):

- a) 'Stable' – the voluntary task is to maintain a static base of support;
- b) 'Quasi-mobile' – the voluntary task is to move the feet (e.g., stepping forward with alternate feet); however, the participant remains in place;
- c) 'Mobile' – the voluntary task is to move from one location to another (e.g., walking, side-stepping); and
- d) 'Unpredictably mobile' – the voluntary task is to move from one location to another in an unpredictable manner (e.g., kicking a soccer ball).

The challenge of each voluntary task can be influenced by manipulating other factors, such as:

- a) The sensory condition (e.g., firm to compliant surfaces, eyes open to eyes closed).
- b) The cognitive requirements (e.g. single task to multi-task, counting backwards, moving on cue).
- c) The environment (e.g., walking on even surface to walking over obstacles).

See "Description of Voluntary Tasks" in Section 5 for further information.

#### **3.3 Methods of Perturbation**

**Internal perturbations** are evoked when the participant attempts to perform a task that causes instability. Various voluntary tasks, including rapid 'agility' tasks (e.g., rapid step-ups) are used to evoke internal perturbations. A task that appears as easy as standing with eyes closed may cause an internal perturbation for a participant with poor balance control. However, some participants do not put themselves in situations causing a loss of balance or necessitating a stepping reaction (i.e., they will

perform agility tasks slowly); therefore, external perturbations are also included in every session to ensure a sufficient training dose.

**External perturbations** are caused by a force outside of the participant's control. Small-magnitude external perturbations may be used with participants who have lower functional abilities. It is usually easiest to start with perturbations that cause a fall towards the physiotherapist (i.e., pull or lean-and-release) so that the physiotherapist can control the outcome and alleviate participants' anxiety and facilitate participants' perceptions of safety. There are three methods for evoking external perturbations: 1) lean-and-release (predictable direction/magnitude; 2) push/pull (can be unpredictable in terms of direction and magnitude; or 3) trip during walking (see Section 5 for details).

### 3.4 Measurement

Measures are taken throughout the training to ensure: 1) focus on participant-specific problems; 2) ongoing progression; and 3) participant safety. The Perturbation Training Log (Section 4) is used to document the following:

- Performance on reactive stepping linked to key areas of focus (e.g., if a goal is to reduce frequency of multiple stepping then frequency of multiple stepping should be documented);
- Number of repetitions (i.e., number of times the participant experiences a loss of balance): '0' = balance recovered using 2 steps or fewer; '1' = balance recovered using more than 2 steps; and, 'X' = assistance provided by the safety harness or physiotherapist to recover balance;
- Additional tasks/conditions;
- Number of rest breaks;
- 'Rating of perceived challenge' (RPC) (Section 6);
- HR and/or BP (if indicated);

### 3.5 Format of training session

- 1) Participant arrives.
- 2) HR and BP are taken.
- 3) Warm-up is completed.
- 4) Harness is donned.
- 5) Tasks, as outlined in the Perturbation Training Log (Section 4), are performed for that particular session. Detailed descriptions of each task can be found in Section 5.
- 6) Documentation about and scoring of each task are completed before moving on to the next task.
- 7) Rest is taken as required, or after each task.
- 8) Cool-down and stretching are completed.

1  
2  
3  
4  
5  
6  
7  
8  
9  
10  
11  
12  
13  
14  
15  
16  
17  
18  
19  
20  
21  
22  
23  
24  
25  
26  
27  
28  
29  
30  
31  
32  
33  
34  
35  
36  
37  
38  
39  
40  
41  
42  
43  
44  
45  
46  
47

**4. PERTURBATION TRAINING LOG**

**Participant ID:** \_\_\_\_\_

**Affected side of body:** \_\_\_\_\_

**Does HR &/or BP need monitoring through session?**    Y    N

**Harness size:** \_\_\_\_\_

**Participant Equipment:**    AFO    AirSport    Arm Sling    Other

**Participant Goal(s):**

\_\_\_\_\_  
\_\_\_\_\_

**Highlights of Assessment Findings:**

CMSA stage ( /7): Leg \_\_\_\_ Foot \_\_\_\_

Position Recognition (#correct/5): DF/PF \_\_\_\_ INV/EV \_\_\_\_

Light touch (#correct/5): \_\_\_\_

Berg balance scale ( /56): \_\_\_\_

Mini-BES - Reactive Postural Control ( /12): \_\_\_\_

TUG (sec): \_\_\_\_

Lean & Release – Preferred trials (#): Right \_\_\_\_ Left \_\_\_\_

Lean & Release – Encouraged use trials (#): Right \_\_\_\_ Left \_\_\_\_

**Comments:**

\_\_\_\_\_  
\_\_\_\_\_

Participant ID: \_\_\_\_\_

Date: \_\_\_\_\_

**Treatment planning:**

| Area of dyscontrol                                                                      | Treatment suggestions                                                                                                                                                                                                                                                                                                                                                                                                     | Additional treatment strategies/comments |
|-----------------------------------------------------------------------------------------|---------------------------------------------------------------------------------------------------------------------------------------------------------------------------------------------------------------------------------------------------------------------------------------------------------------------------------------------------------------------------------------------------------------------------|------------------------------------------|
| <input type="checkbox"/> Requires external assist to regain stability                   | <input type="checkbox"/> Start with low-magnitude perturbation, increase magnitude as tolerated<br><input type="checkbox"/> Consider other problems that contribute, like delayed stepping or no stepping                                                                                                                                                                                                                 |                                          |
| <input type="checkbox"/> Does not step when magnitude of perturbation requires a step   | <input type="checkbox"/> Instruct participant to step when s/he feels unstable<br><input type="checkbox"/> Start with low-magnitude perturbations<br><input type="checkbox"/> Start with predictable time/direction of perturbation<br><input type="checkbox"/> Practice the step prior to perturbation<br><input type="checkbox"/> Consider other problems that contribute, like unwillingness to step with paretic limb |                                          |
| <input type="checkbox"/> Has low foot clearance during step: foot 'slides', or shuffles | <input type="checkbox"/> Use obstacles to 'force' a step-over                                                                                                                                                                                                                                                                                                                                                             |                                          |
| <input type="checkbox"/> Demonstrates delayed stepping reaction                         | <input type="checkbox"/> Instruct participant to step as quickly as possible<br><input type="checkbox"/> Start with predictable time/direction of perturbation<br><input type="checkbox"/> If delay is with non-paretic limb, have participant weight-shift to paretic limb prior to perturbation                                                                                                                         |                                          |



| Area of dyscontrol                                                           | Treatment suggestions                                                                                                                                                                                                                                                                                                                                               | Additional treatment strategies/comments |
|------------------------------------------------------------------------------|---------------------------------------------------------------------------------------------------------------------------------------------------------------------------------------------------------------------------------------------------------------------------------------------------------------------------------------------------------------------|------------------------------------------|
| <input type="checkbox"/> Is unwilling to step with paretic limb              | <input type="checkbox"/> Block the non-paretic limb with obstacles, or hand/ foot of physiotherapist<br><input type="checkbox"/> Instruct participant to step with paretic limb<br><input type="checkbox"/> Start with predictable time/direction of perturbation<br><input type="checkbox"/> Time perturbation to coincide with paretic leg/foot being un-weighted |                                          |
| <input type="checkbox"/> Demonstrates multi-step reactions                   | <input type="checkbox"/> Instruct participant to take as few steps as possible<br><input type="checkbox"/> Instruct participant to take long(er) steps                                                                                                                                                                                                              |                                          |
| <input type="checkbox"/> Stands asymmetrically prior to perturbation         | <input type="checkbox"/> Instruct participant to increase loading on the less-loaded limb<br><input type="checkbox"/> Consider using video or feedback of stance symmetry                                                                                                                                                                                           |                                          |
| <input type="checkbox"/> Takes short steps                                   | <input type="checkbox"/> Instruct participant to take longer steps<br><input type="checkbox"/> Step to targets<br><input type="checkbox"/> Step over obstacles                                                                                                                                                                                                      |                                          |
| <input type="checkbox"/> Attempts to use upper extremity to regain stability | <input type="checkbox"/> Physiotherapist should stand as far away as safely possible<br><input type="checkbox"/> Instruct to not use reach-to-grasp reactions<br><input type="checkbox"/> Have participant hold object to prevent grasping                                                                                                                          |                                          |

| Area of dyscontrol                                                                  | Treatment suggestions                                                                                                                                                                                                                                   | Additional treatment strategies/comments |
|-------------------------------------------------------------------------------------|---------------------------------------------------------------------------------------------------------------------------------------------------------------------------------------------------------------------------------------------------------|------------------------------------------|
| <input type="checkbox"/> Falls laterally on step termination                        | <input type="checkbox"/> Instruct participant to take as few steps as possible<br><input type="checkbox"/> Start with low-magnitude perturbation<br><input type="checkbox"/> Try forward/backward perturbations initially with a narrow base of support |                                          |
| <input type="checkbox"/> Uses 'crossover' steps to respond to lateral perturbations | <input type="checkbox"/> Instruct participant to use side-stepping strategy<br><input type="checkbox"/> Place large obstacles in front and behind participant to deter cross-overs                                                                      |                                          |
| <input type="checkbox"/> Is unable to step equally well in all directions           | <input type="checkbox"/> Use multi-directional perturbations<br><input type="checkbox"/> Do more perturbations in the most challenging direction                                                                                                        |                                          |

**'Stable' tasks: session 1**

|                      |            |                       |            |                       |            |
|----------------------|------------|-----------------------|------------|-----------------------|------------|
| <b>Initial - HR:</b> | <b>BP:</b> | <b>Repeat 1 - HR:</b> | <b>BP:</b> | <b>Repeat 2 - HR:</b> | <b>BP:</b> |
|----------------------|------------|-----------------------|------------|-----------------------|------------|

| <b>Voluntary task</b>                                                 | <b>Adaptation to reduce difficulty</b> | <b>Adaptation to increase difficulty</b> | <b>Perturbation</b>                  | <b>Outcome</b><br>(0= $\leq$ 2 steps, 1=multi step, X=loss of balance) | <b>RPC</b> | <b># Rests during task</b> | <b>Rest after task (Y/N)</b> |
|-----------------------------------------------------------------------|----------------------------------------|------------------------------------------|--------------------------------------|------------------------------------------------------------------------|------------|----------------------------|------------------------------|
| Standing still with feet hip-width apart                              | <input type="checkbox"/> Wide BOS      | <input type="checkbox"/> Feet together   | 6 multi-directional lean-and-release |                                                                        |            |                            |                              |
| Standing still with feet hip-width apart, eyes closed                 | <input type="checkbox"/> Wide BOS      | <input type="checkbox"/> Feet together   | 6 multi-directional lean-and-release |                                                                        |            |                            |                              |
| Standing still with feet hip-width apart, on a thin foam mat          | <input type="checkbox"/> Wide BOS      | <input type="checkbox"/> Feet together   | 6 multi-directional lean-and-release |                                                                        |            |                            |                              |
| Standing still with feet hip-width apart, on a thick foam pad         | <input type="checkbox"/> Wide BOS      | <input type="checkbox"/> Feet together   | 6 multi-directional lean-and-release |                                                                        |            |                            |                              |
| Standing still with feet hip-width apart, turning head left and right | <input type="checkbox"/> Wide BOS      | <input type="checkbox"/> Feet together   | 6 multi-directional lean-and-release |                                                                        |            |                            |                              |
| Standing still with feet hip-width apart, looking up and down         | <input type="checkbox"/> Wide BOS      | <input type="checkbox"/> Feet together   | 6 multi-directional lean-and-release |                                                                        |            |                            |                              |
| Standing with feet hip-width apart, counting backwards by 3's         | <input type="checkbox"/> Wide BOS      | <input type="checkbox"/> Feet together   | 6 multi-directional lean-and-release |                                                                        |            |                            |                              |

| Voluntary task                                                                                        | Adaptation to reduce difficulty   | Adaptation to increase difficulty      | Perturbation                         | Outcome<br>(0= $\leq$ 2 steps, I=multi step, X=loss of balance) | RPC | # Rests during task | Rest after task (Y/N) |
|-------------------------------------------------------------------------------------------------------|-----------------------------------|----------------------------------------|--------------------------------------|-----------------------------------------------------------------|-----|---------------------|-----------------------|
| Standing with feet hip-width apart, eyes closed & counting backwards by 3's                           | <input type="checkbox"/> Wide BOS | <input type="checkbox"/> Feet together | 6 multi-directional lean-and-release |                                                                 |     |                     |                       |
| Standing with feet hip-width apart, rapid weight-shifting left and right                              | <input type="checkbox"/> Wide BOS | <input type="checkbox"/> Feet together | 6 multi-directional push/pull        |                                                                 |     |                     |                       |
| Standing with feet hip-width apart, or in stride position, rapid weight-shifting forward and backward | <input type="checkbox"/> Wide BOS | <input type="checkbox"/> Feet together | 6 multi-directional push/pull        |                                                                 |     |                     |                       |
| Standing with feet hip-width apart, throwing & catching a ball                                        | <input type="checkbox"/> Wide BOS | <input type="checkbox"/> Feet together | internal                             |                                                                 |     |                     |                       |
| Standing with feet hip-width apart, rapid arm raises forward and to the sides                         | <input type="checkbox"/> Wide BOS | <input type="checkbox"/> Feet together | internal                             |                                                                 |     |                     |                       |

HR: \_\_\_\_\_ BP: \_\_\_\_\_

Overall rating of perceived challenge: \_\_\_\_\_

|                        |    |  |  |  |  |
|------------------------|----|--|--|--|--|
| <b>TOTALS/AVERAGES</b> | 0= |  |  |  |  |
|                        | I= |  |  |  |  |
|                        | X= |  |  |  |  |

Overall comments for the session: \_\_\_\_\_  
 \_\_\_\_\_  
 \_\_\_\_\_  
 \_\_\_\_\_

**'Stable' tasks: Session 2**

|                      |            |                       |            |                       |            |
|----------------------|------------|-----------------------|------------|-----------------------|------------|
| <b>Initial - HR:</b> | <b>BP:</b> | <b>Repeat 1 - HR:</b> | <b>BP:</b> | <b>Repeat 2 - HR:</b> | <b>BP:</b> |
|----------------------|------------|-----------------------|------------|-----------------------|------------|

| <b>Voluntary task</b>                                                       | <b>Adaptation to reduce difficulty</b> | <b>Adaptation to increase difficulty</b> | <b>Perturbation</b>                  | <b>Outcome</b><br>(0= $\leq$ 2 steps, 1=multi step, X=loss of balance) | <b>RPC</b> | <b># Rests during task</b> | <b>Rest after task (Y/N)</b> |
|-----------------------------------------------------------------------------|----------------------------------------|------------------------------------------|--------------------------------------|------------------------------------------------------------------------|------------|----------------------------|------------------------------|
| Standing still with feet hip-width apart                                    | <input type="checkbox"/> Wide BOS      | <input type="checkbox"/> Feet together   | 6 multi-directional lean-and-release |                                                                        |            |                            |                              |
| Standing still with feet hip-width apart, eyes closed                       | <input type="checkbox"/> Wide BOS      | <input type="checkbox"/> Feet together   | 6 multi-directional lean-and-release |                                                                        |            |                            |                              |
| Standing still with feet hip-width apart, on a thin foam mat                | <input type="checkbox"/> Wide BOS      | <input type="checkbox"/> Feet together   | 6 multi-directional lean-and-release |                                                                        |            |                            |                              |
| Standing still with feet hip-width apart, on a thick foam pad               | <input type="checkbox"/> Wide BOS      | <input type="checkbox"/> Feet together   | 6 multi-directional lean-and-release |                                                                        |            |                            |                              |
| Standing still with feet hip-width apart, turning head left and right       | <input type="checkbox"/> Wide BOS      | <input type="checkbox"/> Feet together   | 6 multi-directional lean-and-release |                                                                        |            |                            |                              |
| Standing still with feet hip-width apart, looking up and down               | <input type="checkbox"/> Wide BOS      | <input type="checkbox"/> Feet together   | 6 multi-directional lean-and-release |                                                                        |            |                            |                              |
| Standing with feet hip-width apart, counting backwards by 3's               | <input type="checkbox"/> Wide BOS      | <input type="checkbox"/> Feet together   | 6 multi-directional lean-and-release |                                                                        |            |                            |                              |
| Standing with feet hip-width apart, eyes closed & counting backwards by 3's | <input type="checkbox"/> Wide BOS      | <input type="checkbox"/> Feet together   | 6 multi-directional lean-and-release |                                                                        |            |                            |                              |
| Standing with feet hip-width apart, rapid weight-shifting left and right    | <input type="checkbox"/> Wide BOS      | <input type="checkbox"/> Feet together   | 6 multi-directional push/pull        |                                                                        |            |                            |                              |

| Voluntary task                                                                                        | Adaptation to reduce difficulty      | Adaptation to increase difficulty      | Perturbation                  | Outcome<br>(0= $\leq 2$ steps, I=multi step, X=loss of balance) | RPC | # Rests During task | Rest After task (Y/N) |
|-------------------------------------------------------------------------------------------------------|--------------------------------------|----------------------------------------|-------------------------------|-----------------------------------------------------------------|-----|---------------------|-----------------------|
| Standing with feet hip-width apart, or in stride position, rapid weight-shifting forward and backward | <input type="checkbox"/> Wide BOS    | <input type="checkbox"/> Feet together | 6 multi-directional push/pull |                                                                 |     |                     |                       |
| Standing with feet hip-width apart, throwing & catching a ball                                        | <input type="checkbox"/> Wide BOS    | <input type="checkbox"/> Feet together | internal                      |                                                                 |     |                     |                       |
| Standing with feet hip-width apart, rapid arm raises forward and to the sides                         | <input type="checkbox"/> Wide BOS    | <input type="checkbox"/> Feet together | internal                      |                                                                 |     |                     |                       |
| Rapid stepping forward with alternate feet                                                            | <input type="checkbox"/> Short steps | <input type="checkbox"/> Long steps    | internal                      |                                                                 |     |                     |                       |
| Rapid stepping backward with alternate feet                                                           | <input type="checkbox"/> Short steps | <input type="checkbox"/> Long steps    | internal                      |                                                                 |     |                     |                       |
| Rapid stepping to the right (right foot)                                                              | <input type="checkbox"/> Short steps | <input type="checkbox"/> Long steps    | internal                      |                                                                 |     |                     |                       |
| Rapid stepping to the left (left foot)                                                                | <input type="checkbox"/> Short steps | <input type="checkbox"/> Long steps    | internal                      |                                                                 |     |                     |                       |

HR: \_\_\_\_\_ BP: \_\_\_\_\_

Overall rating of perceived challenge: \_\_\_\_\_

|                        |    |  |  |  |  |
|------------------------|----|--|--|--|--|
| <b>TOTALS/AVERAGES</b> | 0= |  |  |  |  |
|                        | I= |  |  |  |  |
|                        | X= |  |  |  |  |

Overall comments for the session: \_\_\_\_\_  
 \_\_\_\_\_  
 \_\_\_\_\_  
 \_\_\_\_\_

**'Quasi-mobile' tasks: Session 3**

|                      |            |                       |            |                       |            |
|----------------------|------------|-----------------------|------------|-----------------------|------------|
| <b>Initial - HR:</b> | <b>BP:</b> | <b>Repeat 1 - HR:</b> | <b>BP:</b> | <b>Repeat 2 - HR:</b> | <b>BP:</b> |
|----------------------|------------|-----------------------|------------|-----------------------|------------|

| <b>Voluntary task</b>                                           | <b>Adaptation to reduce difficulty</b>                  | <b>Adaptation to increase difficulty</b>                     | <b>Perturbation</b>           | <b>Outcome</b><br>(0= $\leq$ 2 steps, 1=multi step, X=loss of balance) | <b>RPC</b> | <b># Rests during task</b> | <b>Rest after task (Y/N)</b> |
|-----------------------------------------------------------------|---------------------------------------------------------|--------------------------------------------------------------|-------------------------------|------------------------------------------------------------------------|------------|----------------------------|------------------------------|
| Rapid stepping forward with alternate feet                      | <input type="checkbox"/> Short steps                    | <input type="checkbox"/> Long steps                          | 6 multi-directional push/pull |                                                                        |            |                            |                              |
| Rapid stepping backward with alternate feet                     | <input type="checkbox"/> Short steps                    | <input type="checkbox"/> Long steps                          | 6 multi-directional push/pull |                                                                        |            |                            |                              |
| Rapid stepping to alternate sides                               | <input type="checkbox"/> Short steps                    | <input type="checkbox"/> Long steps                          | 6 multi-directional push/pull |                                                                        |            |                            |                              |
| Rapid tap-ups forward with alternate feet                       | <input type="checkbox"/> Low step<br>Step Height: _____ | <input type="checkbox"/> Unstable surface (e.g. soccer ball) | 6 multi-directional push/pull |                                                                        |            |                            |                              |
| Walking in place                                                | <input type="checkbox"/> Feet barely off floor          | <input type="checkbox"/> Knees to hip-height                 | 6 multi-directional push/pull |                                                                        |            |                            |                              |
| Rapid stepping forward with alternate feet, on a thin foam mat  | <input type="checkbox"/> Short steps                    | <input type="checkbox"/> Long steps                          | 6 multi-directional push/pull |                                                                        |            |                            |                              |
| Rapid stepping backward with alternate feet, on a thin foam mat | <input type="checkbox"/> Short steps                    | <input type="checkbox"/> Long steps                          | 6 multi-directional push/pull |                                                                        |            |                            |                              |

| Voluntary task                                                | Adaptation to reduce difficulty                         | Adaptation to increase difficulty                            | Perturbation                  | Outcome<br>(0= $\leq$ 2 steps, 1=multi step, X=loss of balance) | RPC | # Rests during task | Rest after task (Y/N) |
|---------------------------------------------------------------|---------------------------------------------------------|--------------------------------------------------------------|-------------------------------|-----------------------------------------------------------------|-----|---------------------|-----------------------|
| Rapid stepping to alternate sides, on a thin foam mat         | <input type="checkbox"/> Short steps                    | <input type="checkbox"/> Long steps                          | 6 multi-directional push/pull |                                                                 |     |                     |                       |
| Rapid tap-ups forward with alternate feet, on a thin foam mat | <input type="checkbox"/> Low step<br>Step Height: _____ | <input type="checkbox"/> Unstable surface (e.g. soccer ball) | 6 multi-directional push/pull |                                                                 |     |                     |                       |
| Walking in place, on a thin foam mat                          | <input type="checkbox"/> Feet barely off floor          | <input type="checkbox"/> Knees to hip-height                 | 6 multi-directional push/pull |                                                                 |     |                     |                       |

HR: \_\_\_\_\_

BP: \_\_\_\_\_

Overall rating of perceived challenge: \_\_\_\_\_

|                        |    |  |  |  |  |
|------------------------|----|--|--|--|--|
| <b>TOTALS/AVERAGES</b> | 0= |  |  |  |  |
|                        | 1= |  |  |  |  |
|                        | X= |  |  |  |  |

Overall comments for the session: \_\_\_\_\_  
 \_\_\_\_\_  
 \_\_\_\_\_  
 \_\_\_\_\_



**'Quasi-mobile' tasks: Session 4**

|                      |            |                       |            |                       |            |
|----------------------|------------|-----------------------|------------|-----------------------|------------|
| <b>Initial - HR:</b> | <b>BP:</b> | <b>Repeat 1 - HR:</b> | <b>BP:</b> | <b>Repeat 2 - HR:</b> | <b>BP:</b> |
|----------------------|------------|-----------------------|------------|-----------------------|------------|

| <b>Voluntary task</b>                                                   | <b>Adaptation to reduce difficulty</b>                  | <b>Adaptation to increase difficulty</b>                     | <b>Perturbation</b>           | <b>Outcome</b><br>(0= $\leq$ 2 steps, 1=multi step, X=loss of balance) | <b>RPC</b> | <b># Rests during task</b> | <b>Rest after task (Y/N)</b> |
|-------------------------------------------------------------------------|---------------------------------------------------------|--------------------------------------------------------------|-------------------------------|------------------------------------------------------------------------|------------|----------------------------|------------------------------|
| Rapid stepping forward and backward with right foot                     | <input type="checkbox"/> Short steps; rest in stance    | <input type="checkbox"/> Long steps                          | 6 multi-directional push/pull |                                                                        |            |                            |                              |
| Rapid stepping forward and backward with left foot                      | <input type="checkbox"/> Short steps; rest in stance    | <input type="checkbox"/> Long steps                          | 6 multi-directional push/pull |                                                                        |            |                            |                              |
| Rapid tap-ups forward with alternate feet                               | <input type="checkbox"/> Low step<br>Step Height: _____ | <input type="checkbox"/> Unstable surface (e.g. soccer ball) | 6 multi-directional push/pull |                                                                        |            |                            |                              |
| Rapid step-ups with alternate feet                                      | <input type="checkbox"/> Low step<br>Step Height: _____ | <input type="checkbox"/> Unstable surface (e.g. dense foam)  | 6 multi-directional push/pull |                                                                        |            |                            |                              |
| Rapid tap-ups to alternate sides                                        | <input type="checkbox"/> Low step<br>Step Height: _____ | <input type="checkbox"/> Unstable surface (e.g. soccer ball) | 6 multi-directional push/pull |                                                                        |            |                            |                              |
| Rapid stepping forward and backward with right foot, on a thin foam mat | <input type="checkbox"/> Short steps; rest in stance    | <input type="checkbox"/> Long steps                          | 6 multi-directional push/pull |                                                                        |            |                            |                              |
| Rapid stepping forward and backward with left foot, on a thin foam mat  | <input type="checkbox"/> Short steps; rest in stance    | <input type="checkbox"/> Long steps                          | 6 multi-directional push/pull |                                                                        |            |                            |                              |

| Voluntary task                                                | Adaptation to reduce difficulty                         | Adaptation to increase difficulty                            | Perturbation                  | Outcome<br>(0= $\leq$ 2 steps, I=multi step, X=loss of balance) | RPC | # Rests during task | Rest after task (Y/N) |
|---------------------------------------------------------------|---------------------------------------------------------|--------------------------------------------------------------|-------------------------------|-----------------------------------------------------------------|-----|---------------------|-----------------------|
| Rapid tap-ups forward with alternate feet, on a thin foam mat | <input type="checkbox"/> Low step<br>Step Height: _____ | <input type="checkbox"/> Unstable surface (e.g. soccer ball) | 6 multi-directional push/pull |                                                                 |     |                     |                       |
| Rapid step-ups with alternate feet, on a thin foam mat        | <input type="checkbox"/> Low step<br>Step Height: _____ | <input type="checkbox"/> Unstable surface (e.g. dense foam)  | 6 multi-directional push/pull |                                                                 |     |                     |                       |
| Rapid tap-ups to alternate sides, on a thin foam mat          | <input type="checkbox"/> Low step<br>Step Height: _____ | <input type="checkbox"/> Unstable surface (e.g. soccer ball) | 6 multi-directional push/pull |                                                                 |     |                     |                       |

HR: \_\_\_\_\_

BP: \_\_\_\_\_

Overall rating of perceived challenge: \_\_\_\_\_

|                        |    |  |  |  |  |
|------------------------|----|--|--|--|--|
| <b>TOTALS/AVERAGES</b> | 0= |  |  |  |  |
|                        | I= |  |  |  |  |
|                        | X= |  |  |  |  |

**Overall comments for the session:** \_\_\_\_\_  
 \_\_\_\_\_  
 \_\_\_\_\_  
 \_\_\_\_\_

**'Quasi-mobile' tasks: Session 5**

|                      |            |                       |            |                       |            |
|----------------------|------------|-----------------------|------------|-----------------------|------------|
| <b>Initial - HR:</b> | <b>BP:</b> | <b>Repeat 1 - HR:</b> | <b>BP:</b> | <b>Repeat 2 - HR:</b> | <b>BP:</b> |
|----------------------|------------|-----------------------|------------|-----------------------|------------|

| <b>Voluntary task</b>                                       | <b>Adaptation to reduce difficulty</b>               | <b>Adaptation to increase difficulty</b>     | <b>Perturbation</b>           | <b>Outcome</b><br>(0= $\leq$ 2 steps, 1=multi step, X=loss of balance) | <b>RPC</b> | <b># Rests during task</b> | <b>Rest after task (Y/N)</b> |
|-------------------------------------------------------------|------------------------------------------------------|----------------------------------------------|-------------------------------|------------------------------------------------------------------------|------------|----------------------------|------------------------------|
| Rapid stepping forward and backward with right foot         | <input type="checkbox"/> Short steps; rest in stance | <input type="checkbox"/> Long steps          | 6 multi-directional push/pull |                                                                        |            |                            |                              |
| Rapid stepping forward and backward with left foot          | <input type="checkbox"/> Short steps; rest in stance | <input type="checkbox"/> Long steps          | 6 multi-directional push/pull |                                                                        |            |                            |                              |
| Rapid stepping to alternate sides                           | <input type="checkbox"/> Short steps                 | <input type="checkbox"/> Long steps          | 6 multi-directional push/pull |                                                                        |            |                            |                              |
| Rapid diagonal forward stepping with alternate feet         | <input type="checkbox"/> Short steps                 | <input type="checkbox"/> Long steps          | 6 multi-directional push/pull |                                                                        |            |                            |                              |
| Walking in place                                            | <input type="checkbox"/> Feet barely off floor       | <input type="checkbox"/> Knees to hip-height | 6 multi-directional push/pull |                                                                        |            |                            |                              |
| Walking in place, eyes closed                               | <input type="checkbox"/> Feet barely off floor       | <input type="checkbox"/> Knees to hip-height | 6 multi-directional push/pull |                                                                        |            |                            |                              |
| Rapid stepping with alternate feet in random cued direction | <input type="checkbox"/> Short steps                 | <input type="checkbox"/> Long steps          | 6 multi-directional push/pull |                                                                        |            |                            |                              |

| Voluntary task                            | Adaptation to reduce difficulty                         | Adaptation to increase difficulty                            | Perturbation                  | Outcome<br>(0= $\leq 2$ steps, I=multi step, X=loss of balance) | RPC | # Rests during task | Rest after task (Y/N) |
|-------------------------------------------|---------------------------------------------------------|--------------------------------------------------------------|-------------------------------|-----------------------------------------------------------------|-----|---------------------|-----------------------|
| Rapid step-ups with alternate feet        | <input type="checkbox"/> Low step<br>Step Height: _____ | <input type="checkbox"/> Unstable surface (e.g. dense foam)  | 6 multi-directional push/pull |                                                                 |     |                     |                       |
| Rapid tap-ups forward with alternate feet | <input type="checkbox"/> Low step<br>Step Height: _____ | <input type="checkbox"/> Unstable surface (e.g. soccer ball) | 6 multi-directional push/pull |                                                                 |     |                     |                       |
| Rapid tap-ups to alternate sides          | <input type="checkbox"/> Low step<br>Step Height: _____ | <input type="checkbox"/> Unstable surface (e.g. soccer ball) | 6 multi-directional push/pull |                                                                 |     |                     |                       |

HR: \_\_\_\_\_

BP: \_\_\_\_\_

Overall rating of perceived challenge: \_\_\_\_\_

|                        |    |  |  |  |  |
|------------------------|----|--|--|--|--|
| <b>TOTALS/AVERAGES</b> | 0= |  |  |  |  |
|                        | I= |  |  |  |  |
|                        | X= |  |  |  |  |

**Overall comments for the session:** \_\_\_\_\_  
 \_\_\_\_\_  
 \_\_\_\_\_  
 \_\_\_\_\_

**'Quasi-mobile' tasks: Session 6**

|                      |            |                       |            |                       |            |
|----------------------|------------|-----------------------|------------|-----------------------|------------|
| <b>Initial - HR:</b> | <b>BP:</b> | <b>Repeat 1 - HR:</b> | <b>BP:</b> | <b>Repeat 2 - HR:</b> | <b>BP:</b> |
|----------------------|------------|-----------------------|------------|-----------------------|------------|

| <b>Voluntary task</b>                                       | <b>Adaptation to reduce difficulty</b>         | <b>Adaptation to increase difficulty</b>     | <b>Perturbation</b>           | <b>Outcome</b><br>(0= $\leq$ 2 steps, 1=multi step, X=loss of balance) | <b>RPC</b> | <b># Rests during task</b> | <b>Rest after task (Y/N)</b> |
|-------------------------------------------------------------|------------------------------------------------|----------------------------------------------|-------------------------------|------------------------------------------------------------------------|------------|----------------------------|------------------------------|
| Rapid stepping forward with alternate feet                  | <input type="checkbox"/> Short steps           | <input type="checkbox"/> Long steps          | 6 multi-directional push/pull |                                                                        |            |                            |                              |
| Rapid stepping backward with alternate feet                 | <input type="checkbox"/> Short steps           | <input type="checkbox"/> Long steps          | 6 multi-directional push/pull |                                                                        |            |                            |                              |
| Rapid stepping to alternate sides                           | <input type="checkbox"/> Short steps           | <input type="checkbox"/> Long steps          | 6 multi-directional push/pull |                                                                        |            |                            |                              |
| Walking in place, eyes closed                               | <input type="checkbox"/> Feet barely off floor | <input type="checkbox"/> Knees to hip-height | 6 multi-directional push/pull |                                                                        |            |                            |                              |
| 'Jogging' (or fast walking) in place                        | <input type="checkbox"/> Feet barely off floor | <input type="checkbox"/> Knees to hip-height | 6 multi-directional push/pull |                                                                        |            |                            |                              |
| Rapid diagonal forward stepping with alternate feet         | <input type="checkbox"/> Short steps           | <input type="checkbox"/> Long steps          | 6 multi-directional push/pull |                                                                        |            |                            |                              |
| Rapid stepping with alternate feet in random cued direction | <input type="checkbox"/> Short steps           | <input type="checkbox"/> Long steps          | 6 multi-directional push/pull |                                                                        |            |                            |                              |

| Voluntary task                                                                  | Adaptation to reduce difficulty                | Adaptation to increase difficulty            | Perturbation                  | Outcome<br>(0= $\leq$ 2 steps, I=multi step, X=loss of balance) | RPC | # Rests during task | Rest after task (Y/N) |
|---------------------------------------------------------------------------------|------------------------------------------------|----------------------------------------------|-------------------------------|-----------------------------------------------------------------|-----|---------------------|-----------------------|
| 'jogging' (or fast walking) in place, on a thin foam mat                        | <input type="checkbox"/> Feet barely off floor | <input type="checkbox"/> Knees to hip-height | 6 multi-directional push/pull |                                                                 |     |                     |                       |
| Rapid diagonal forward stepping with alternate feet, on a thin foam mat         | <input type="checkbox"/> Short steps           | <input type="checkbox"/> Long steps          | 6 multi-directional push/pull |                                                                 |     |                     |                       |
| Rapid stepping with alternate feet in random cued direction, on a thin foam mat | <input type="checkbox"/> Short steps           | <input type="checkbox"/> Long steps          | 6 multi-directional push/pull |                                                                 |     |                     |                       |

HR: \_\_\_\_\_

BP: \_\_\_\_\_

Overall rating of perceived challenge: \_\_\_\_\_

|                        |    |  |  |  |  |
|------------------------|----|--|--|--|--|
| <b>TOTALS/AVERAGES</b> | 0= |  |  |  |  |
|                        | I= |  |  |  |  |
|                        | X= |  |  |  |  |

**Overall comments for the session:** \_\_\_\_\_  
 \_\_\_\_\_  
 \_\_\_\_\_  
 \_\_\_\_\_

**'Mobile' tasks: Session 7**

|                      |            |                       |            |                       |            |
|----------------------|------------|-----------------------|------------|-----------------------|------------|
| <b>Initial - HR:</b> | <b>BP:</b> | <b>Repeat 1 - HR:</b> | <b>BP:</b> | <b>Repeat 2 - HR:</b> | <b>BP:</b> |
|----------------------|------------|-----------------------|------------|-----------------------|------------|

| <b>Voluntary task</b>                                                        | <b>Adaptation to reduce difficulty</b>                        | <b>Adaptation to increase difficulty</b>                                | <b>Perturbation</b>           | <b>Outcome</b><br>(0= $\leq$ 2 steps, 1=multi step, X=loss of balance) | <b>RPC</b> | <b># Rests during task</b> | <b>Rest after task (Y/N)</b> |
|------------------------------------------------------------------------------|---------------------------------------------------------------|-------------------------------------------------------------------------|-------------------------------|------------------------------------------------------------------------|------------|----------------------------|------------------------------|
| Walking forward                                                              | <input type="checkbox"/> Short steps; walk slowly             | <input type="checkbox"/> Long steps; traffic light                      | 6 multi-directional push/pull |                                                                        |            |                            |                              |
| Walking forward, turning head left and right                                 | <input type="checkbox"/> Short steps; walk slowly             | <input type="checkbox"/> Long steps; traffic light                      | 6 multi-directional push/pull |                                                                        |            |                            |                              |
| Walking forward, looking up and down                                         | <input type="checkbox"/> Short steps; walk slowly             | <input type="checkbox"/> Long steps; traffic light                      | 6 multi-directional push/pull |                                                                        |            |                            |                              |
| Walking and stepping over obstacles                                          | <input type="checkbox"/> Low/short obstacles<br>Define: _____ | <input type="checkbox"/> High/long obstacles<br>Define: _____           | 6 multi-directional push/pull |                                                                        |            |                            |                              |
| Forward braiding                                                             | <input type="checkbox"/> Walk on the line                     | <input type="checkbox"/> Step further across; long steps; traffic light | 6 multi-directional push/pull |                                                                        |            |                            |                              |
| Side stepping                                                                | <input type="checkbox"/> Short steps                          | <input type="checkbox"/> Long steps                                     | 6 multi-directional push/pull |                                                                        |            |                            |                              |
| Turning on the spot (alternate between turning to the left and to the right) | <input type="checkbox"/> Turn slowly                          | <input type="checkbox"/> Turn quickly                                   | 6 multi-directional push/pull |                                                                        |            |                            |                              |

| Voluntary task                                                                                | Adaptation to reduce difficulty      | Adaptation to increase difficulty     | Perturbation                  | Outcome<br>(0= $\leq 2$ steps, I=multi step, X=loss of balance) | RPC | # Rests during task | Rest after task (Y/N) |
|-----------------------------------------------------------------------------------------------|--------------------------------------|---------------------------------------|-------------------------------|-----------------------------------------------------------------|-----|---------------------|-----------------------|
| Turning on the spot with eyes closed (alternate between turning to the left and to the right) | <input type="checkbox"/> Turn slowly | <input type="checkbox"/> Turn quickly | 6 multi-directional push/pull |                                                                 |     |                     |                       |
| Turning on the spot, in cued direction                                                        | <input type="checkbox"/> Turn slowly | <input type="checkbox"/> Turn quickly | 6 multi-directional push/pull |                                                                 |     |                     |                       |
| Four square stepping                                                                          | <input type="checkbox"/> Short steps | <input type="checkbox"/> Long steps   | 6 multi-directional push/pull |                                                                 |     |                     |                       |

HR: \_\_\_\_\_ BP: \_\_\_\_\_ Overall rating of perceived challenge: \_\_\_\_\_

|                        |    |  |  |  |  |
|------------------------|----|--|--|--|--|
| <b>TOTALS/AVERAGES</b> | 0= |  |  |  |  |
|                        | I= |  |  |  |  |
|                        | X= |  |  |  |  |

**Overall comments for the session:** \_\_\_\_\_  
 \_\_\_\_\_  
 \_\_\_\_\_  
 \_\_\_\_\_



**'Mobile' tasks: Session 8**

|                      |            |                       |            |                       |            |
|----------------------|------------|-----------------------|------------|-----------------------|------------|
| <b>Initial - HR:</b> | <b>BP:</b> | <b>Repeat 1 - HR:</b> | <b>BP:</b> | <b>Repeat 2 - HR:</b> | <b>BP:</b> |
|----------------------|------------|-----------------------|------------|-----------------------|------------|

| <b>Voluntary task</b>            | <b>Adaptation to reduce difficulty</b>                        | <b>Adaptation to increase difficulty</b>                      | <b>Perturbation</b>           | <b>Outcome</b><br>(0= $\leq$ 2 steps, 1=multi step, X=loss of balance) | <b>RPC</b> | <b># Rests during task</b> | <b>Rest after task (Y/N)</b> |
|----------------------------------|---------------------------------------------------------------|---------------------------------------------------------------|-------------------------------|------------------------------------------------------------------------|------------|----------------------------|------------------------------|
| Walking forward                  | <input type="checkbox"/> Short steps; walk slowly             | <input type="checkbox"/> Long steps; traffic light            | 6 multi-directional push/pull |                                                                        |            |                            |                              |
| Walking backward                 | <input type="checkbox"/> Short steps; walk slowly             | <input type="checkbox"/> Long steps; traffic light            | 6 multi-directional push/pull |                                                                        |            |                            |                              |
| Walking forward with eyes closed | <input type="checkbox"/> Short steps; walk slowly             | <input type="checkbox"/> Long steps; walk quickly             | 6 multi-directional push/pull |                                                                        |            |                            |                              |
| Tandem walking forward           | <input type="checkbox"/> Not heel-toe; steps close to line    | <input type="checkbox"/> Traffic light                        | 6 multi-directional push/pull |                                                                        |            |                            |                              |
| Side stepping                    | <input type="checkbox"/> Short steps                          | <input type="checkbox"/> Long steps                           | 6 multi-directional push/pull |                                                                        |            |                            |                              |
| Sideways braiding                | <input type="checkbox"/> Steps not fully crossed              | <input type="checkbox"/> Traffic light                        | 6 multi-directional push/pull |                                                                        |            |                            |                              |
| Side stepping over obstacles     | <input type="checkbox"/> Low/short obstacles<br>Define: _____ | <input type="checkbox"/> High/long obstacles<br>Define: _____ | 6 multi-directional push/pull |                                                                        |            |                            |                              |

| <b>Voluntary task</b>                                                        | <b>Adaptation to reduce difficulty</b> | <b>Adaptation to increase difficulty</b> | <b>Perturbation</b>           | <b>Outcome</b><br>(0= $\leq$ 2 steps, 1=multi step, X=loss of balance) | <b>RPC</b> | <b># Rests during task</b> | <b>Rest after task (Y/N)</b> |
|------------------------------------------------------------------------------|----------------------------------------|------------------------------------------|-------------------------------|------------------------------------------------------------------------|------------|----------------------------|------------------------------|
| Turning on the spot (alternate between turning to the left and to the right) | <input type="checkbox"/> Turn slowly   | <input type="checkbox"/> Turn quickly    | 6 multi-directional push/pull |                                                                        |            |                            |                              |
| Turning on the spot in cued direction                                        | <input type="checkbox"/> Turn slowly   | <input type="checkbox"/> Turn quickly    | 6 multi-directional push/pull |                                                                        |            |                            |                              |
| Four square stepping                                                         | <input type="checkbox"/> Short steps   | <input type="checkbox"/> Long steps      | 6 multi-directional push/pull |                                                                        |            |                            |                              |

HR: \_\_\_\_\_

BP: \_\_\_\_\_

**Overall rating of perceived challenge:** \_\_\_\_\_

|                        |    |  |  |  |  |
|------------------------|----|--|--|--|--|
| <b>TOTALS/AVERAGES</b> | 0= |  |  |  |  |
|                        | 1= |  |  |  |  |
|                        | X= |  |  |  |  |

**Overall comments for the session:** \_\_\_\_\_  
 \_\_\_\_\_  
 \_\_\_\_\_  
 \_\_\_\_\_

**'Mobile' Tasks: Session 9**

|                      |            |                       |            |                       |            |
|----------------------|------------|-----------------------|------------|-----------------------|------------|
| <b>Initial - HR:</b> | <b>BP:</b> | <b>Repeat 1 - HR:</b> | <b>BP:</b> | <b>Repeat 2 - HR:</b> | <b>BP:</b> |
|----------------------|------------|-----------------------|------------|-----------------------|------------|

| <b>Voluntary task</b>                   | <b>Adaptation to reduce difficulty</b>                     | <b>Adaptation to increase difficulty</b>           | <b>Perturbation</b>           | <b>Outcome</b><br>(0= $\leq$ 2 steps, 1=multi step, X=loss of balance) | <b>RPC</b> | <b># Rests during task</b> | <b>Rest after task (Y/N)</b> |
|-----------------------------------------|------------------------------------------------------------|----------------------------------------------------|-------------------------------|------------------------------------------------------------------------|------------|----------------------------|------------------------------|
| Walking forward on a thin foam mat      | <input type="checkbox"/> Short steps; walk slowly          | <input type="checkbox"/> Long steps; traffic light | 6 multi-directional push/pull |                                                                        |            |                            |                              |
| Walking backward on a thin foam mat     | <input type="checkbox"/> Short steps; walk slowly          | <input type="checkbox"/> Long steps; traffic light | 6 multi-directional push/pull |                                                                        |            |                            |                              |
| Side stepping on a thin foam mat        | <input type="checkbox"/> Short steps                       | <input type="checkbox"/> Long steps                | 6 multi-directional push/pull |                                                                        |            |                            |                              |
| Four square stepping on a thin foam mat | <input type="checkbox"/> Short steps                       | <input type="checkbox"/> Long steps                | 6 multi-directional push/pull |                                                                        |            |                            |                              |
| Tandem walking forward                  | <input type="checkbox"/> Not heel-toe; steps close to line | <input type="checkbox"/> Traffic light             | 6 multi-directional push/pull |                                                                        |            |                            |                              |
| Tandem walking backward                 | <input type="checkbox"/> Not heel-toe; steps close to line | <input type="checkbox"/> Traffic light             | 6 multi-directional push/pull |                                                                        |            |                            |                              |
| Sideways braiding                       | <input type="checkbox"/> Steps not fully crossed           | <input type="checkbox"/> Traffic light             | 6 multi-directional push/pull |                                                                        |            |                            |                              |

| Voluntary task                                                                                | Adaptation to reduce difficulty                   | Adaptation to increase difficulty                                       | Perturbation                  | Outcome<br>(0= $\leq$ 2 steps, 1=multi step, X=loss of balance) | RPC | # Rests during task | Rest after task (Y/N) |
|-----------------------------------------------------------------------------------------------|---------------------------------------------------|-------------------------------------------------------------------------|-------------------------------|-----------------------------------------------------------------|-----|---------------------|-----------------------|
| Turning on the spot with eyes closed (alternate between turning to the left and to the right) | <input type="checkbox"/> Turn slowly              | <input type="checkbox"/> Turn quickly                                   | 6 multi-directional push/pull |                                                                 |     |                     |                       |
| Forward braiding                                                                              | <input type="checkbox"/> Walk on the line         | <input type="checkbox"/> Step further across; long steps; traffic light | 6 multi-directional push/pull |                                                                 |     |                     |                       |
| Walking forward with eyes closed                                                              | <input type="checkbox"/> Short steps; walk slowly | <input type="checkbox"/> Long steps; walk quickly                       | 6 multi-directional push/pull |                                                                 |     |                     |                       |

HR: \_\_\_\_\_

BP: \_\_\_\_\_

Overall rating of perceived challenge: \_\_\_\_\_

|                        |    |  |  |  |  |
|------------------------|----|--|--|--|--|
| <b>TOTALS/AVERAGES</b> | 0= |  |  |  |  |
|                        | 1= |  |  |  |  |
|                        | X= |  |  |  |  |

**Overall comments for the session:** \_\_\_\_\_  
 \_\_\_\_\_  
 \_\_\_\_\_  
 \_\_\_\_\_

**'Mobile' tasks: Session 10**

|                      |            |                       |            |                       |            |
|----------------------|------------|-----------------------|------------|-----------------------|------------|
| <b>Initial - HR:</b> | <b>BP:</b> | <b>Repeat 1 - HR:</b> | <b>BP:</b> | <b>Repeat 2 - HR:</b> | <b>BP:</b> |
|----------------------|------------|-----------------------|------------|-----------------------|------------|

| <b>Voluntary task</b>                      | <b>Adaptation to reduce difficulty</b>                     | <b>Adaptation to increase difficulty</b>                                | <b>Perturbation</b>           | <b>Outcome</b><br>(0= $\leq$ 2 steps, 1=multi step, X=loss of balance) | <b>RPC</b> | <b># Rests during task</b> | <b>Rest after task (Y/N)</b> |
|--------------------------------------------|------------------------------------------------------------|-------------------------------------------------------------------------|-------------------------------|------------------------------------------------------------------------|------------|----------------------------|------------------------------|
| Tandem walking forward                     | <input type="checkbox"/> Not heel-toe; steps close to line | <input type="checkbox"/> Traffic light                                  | 6 multi-directional push/pull |                                                                        |            |                            |                              |
| Tandem walking backward                    | <input type="checkbox"/> Not heel-toe; steps close to line | <input type="checkbox"/> Traffic light                                  | 6 multi-directional push/pull |                                                                        |            |                            |                              |
| Forward braiding                           | <input type="checkbox"/> Walk on the line                  | <input type="checkbox"/> Step further across; long steps; traffic light | 6 multi-directional push/pull |                                                                        |            |                            |                              |
| Backward braiding                          | <input type="checkbox"/> Walk on the line                  | <input type="checkbox"/> Step further across; long steps; traffic light | 6 multi-directional push/pull |                                                                        |            |                            |                              |
| Tandem walking forward on a thin foam mat  | <input type="checkbox"/> Not heel-toe; steps close to line | <input type="checkbox"/> Traffic light                                  | 6 multi-directional push/pull |                                                                        |            |                            |                              |
| Tandem walking backward on a thin foam mat | <input type="checkbox"/> Not heel-toe; steps close to line | <input type="checkbox"/> Traffic light                                  | 6 multi-directional push/pull |                                                                        |            |                            |                              |
| Forward braiding on a thin foam mat        | <input type="checkbox"/> Walk on the line                  | <input type="checkbox"/> Step further across; long steps; traffic light | 6 multi-directional push/pull |                                                                        |            |                            |                              |

| Voluntary task                                         | Adaptation to reduce difficulty                  | Adaptation to increase difficulty                                       | Perturbation                  | Outcome<br>(0= $\leq$ 2 steps, I=multi step, X=loss of balance) | RPC | # Rests during task | Rest after task (Y/N) |
|--------------------------------------------------------|--------------------------------------------------|-------------------------------------------------------------------------|-------------------------------|-----------------------------------------------------------------|-----|---------------------|-----------------------|
| Backward braiding on a thin foam mat                   | <input type="checkbox"/> Walk on the line        | <input type="checkbox"/> Step further across; long steps; traffic light | 6 multi-directional push/pull |                                                                 |     |                     |                       |
| Sideways braiding on a thin foam mat                   | <input type="checkbox"/> Steps not fully crossed | <input type="checkbox"/> Traffic light                                  | 6 multi-directional push/pull |                                                                 |     |                     |                       |
| Turning on the spot with eyes closed in cued direction | <input type="checkbox"/> Turn slowly             | <input type="checkbox"/> Turn quickly                                   | 6 multi-directional push/pull |                                                                 |     |                     |                       |

HR: \_\_\_\_\_

BP: \_\_\_\_\_

Overall rating of perceived challenge: \_\_\_\_\_

|                        |    |  |  |  |  |
|------------------------|----|--|--|--|--|
| <b>TOTALS/AVERAGES</b> | 0= |  |  |  |  |
|                        | I= |  |  |  |  |
|                        | X= |  |  |  |  |

Overall comments for the session: \_\_\_\_\_  
 \_\_\_\_\_  
 \_\_\_\_\_  
 \_\_\_\_\_

**'Mobile & Unpredictable' Tasks: Session 11**

|                      |            |                       |            |                       |            |
|----------------------|------------|-----------------------|------------|-----------------------|------------|
| <b>Initial - HR:</b> | <b>BP:</b> | <b>Repeat 1 - HR:</b> | <b>BP:</b> | <b>Repeat 2 - HR:</b> | <b>BP:</b> |
|----------------------|------------|-----------------------|------------|-----------------------|------------|

| <b>Voluntary task</b>                                          | <b>Adaptation to reduce difficulty</b> | <b>Adaptation to increase difficulty</b>                                               | <b>Perturbation</b>                                           | <b>Outcome</b><br>(0= $\leq$ 2 steps, 1=multi step, X=loss of balance) | <b>RPC</b> | <b># Rests during task</b> | <b>Rest after task (Y/N)</b> |
|----------------------------------------------------------------|----------------------------------------|----------------------------------------------------------------------------------------|---------------------------------------------------------------|------------------------------------------------------------------------|------------|----------------------------|------------------------------|
| Kicking soccer ball against wall                               | [none]                                 | <input type="checkbox"/> Stand further from wall; kick outside BOS; kick with each leg | 6 perturbations: PT attempts to take ball, nudges participant |                                                                        |            |                            |                              |
| Throwing hand ball against a wall                              | <input type="checkbox"/> Large ball    | <input type="checkbox"/> Small ball; stand further from wall; throw with each arm      | 6 perturbations: PT attempts to take ball, nudges participant |                                                                        |            |                            |                              |
| Kicking soccer ball against wall, standing on a thin foam mat  | [none]                                 | <input type="checkbox"/> Stand further from wall; kick outside BOS; kick with each leg | 6 perturbations: PT attempts to take ball, nudges participant |                                                                        |            |                            |                              |
| Throwing hand ball against a wall, standing on a thin foam mat | <input type="checkbox"/> Large ball    | <input type="checkbox"/> Small ball; stand further from wall; throw with each arm      | 6 perturbations: PT attempts to take ball, nudges participant |                                                                        |            |                            |                              |
| Walking with sudden stops and changes in direction             | <input type="checkbox"/> Walk slowly   | <input type="checkbox"/> Walk quickly                                                  | 6 multi-directional push/pull/trip                            |                                                                        |            |                            |                              |
| Move to different corners of the room                          | <input type="checkbox"/> Walk slowly   | <input type="checkbox"/> Walk quickly                                                  | 6 multi-directional push/pull/trip                            |                                                                        |            |                            |                              |

| Voluntary task                                                                | Adaptation to reduce difficulty                    | Adaptation to increase difficulty                    | Perturbation                        | Outcome<br>(0= $\leq$ 2 steps, I=multi step, X=loss of balance) | RPC | # Rests during task | Rest after task (Y/N) |
|-------------------------------------------------------------------------------|----------------------------------------------------|------------------------------------------------------|-------------------------------------|-----------------------------------------------------------------|-----|---------------------|-----------------------|
| Walking with sudden stops and changes in direction, obstacles around the room | <input type="checkbox"/> Walk slowly               | <input type="checkbox"/> Walk quickly                | 6 multi-directional push/pull/trip  |                                                                 |     |                     |                       |
| Move to different corners of the room, obstacles around the room              | <input type="checkbox"/> Walk slowly               | <input type="checkbox"/> Walk quickly                | 6 multi-directional push/pull/trip  |                                                                 |     |                     |                       |
| Four square stepping to unpredictable cued direction                          | <input type="checkbox"/> Short steps               | <input type="checkbox"/> Long steps                  | 12 multi-directional push/pull/trip |                                                                 |     |                     |                       |
| 'Dodgeball'                                                                   | <input type="checkbox"/> Ball thrown at upper body | <input type="checkbox"/> Ball thrown rapidly at feet | internal                            |                                                                 |     |                     |                       |

HR: \_\_\_\_\_ BP: \_\_\_\_\_

Overall rating of perceived challenge: \_\_\_\_\_

|                        |    |  |  |  |  |
|------------------------|----|--|--|--|--|
| <b>TOTALS/AVERAGES</b> | 0= |  |  |  |  |
|                        | I= |  |  |  |  |
|                        | X= |  |  |  |  |

Overall comments for the session: \_\_\_\_\_  
 \_\_\_\_\_  
 \_\_\_\_\_  
 \_\_\_\_\_



**'Mobile & unpredictable' tasks: Session 12**

|                      |            |                       |            |                       |            |
|----------------------|------------|-----------------------|------------|-----------------------|------------|
| <b>Initial - HR:</b> | <b>BP:</b> | <b>Repeat 1 - HR:</b> | <b>BP:</b> | <b>Repeat 2 - HR:</b> | <b>BP:</b> |
|----------------------|------------|-----------------------|------------|-----------------------|------------|

| <b>Voluntary task</b>                                                         | <b>Adaptation to reduce difficulty</b>               | <b>Adaptation to increase difficulty</b>               | <b>Perturbation</b>                 | <b>Outcome</b><br>(0= $\leq 2$ steps, 1=multi step, X=loss of balance) | <b>RPC</b> | <b># Rests during task</b> | <b>Rest after task (Y/N)</b> |
|-------------------------------------------------------------------------------|------------------------------------------------------|--------------------------------------------------------|-------------------------------------|------------------------------------------------------------------------|------------|----------------------------|------------------------------|
| Kicking soccer ball back and forth with physiotherapist                       | <input type="checkbox"/> Within reach; kicked slowly | <input type="checkbox"/> Step to reach; kicked quickly | internal                            |                                                                        |            |                            |                              |
| Throwing ball back and forth with physiotherapist                             | <input type="checkbox"/> Large ball; within reach    | <input type="checkbox"/> Small ball; step to reach     | internal                            |                                                                        |            |                            |                              |
| Kicking soccer ball with physiotherapist, standing on a thin foam mat         | <input type="checkbox"/> Within reach; kicked slowly | <input type="checkbox"/> Step to reach; kicked quickly | internal                            |                                                                        |            |                            |                              |
| Throwing ball with physiotherapist, standing on a thin foam mat               | <input type="checkbox"/> Large ball; within reach    | <input type="checkbox"/> Small ball; step to reach     | internal                            |                                                                        |            |                            |                              |
| Walking with sudden stops and changes in direction                            | <input type="checkbox"/> Walk slowly                 | <input type="checkbox"/> Walk quickly                  | 12 multi-directional push/pull/trip |                                                                        |            |                            |                              |
| Move to different corners of the room                                         | <input type="checkbox"/> Walk slowly                 | <input type="checkbox"/> Walk quickly                  | 12 multi-directional push/pull/trip |                                                                        |            |                            |                              |
| Walking with sudden stops and changes in direction, obstacles around the room | <input type="checkbox"/> Walk slowly                 | <input type="checkbox"/> Walk quickly                  | 12 multi-directional push/pull/trip |                                                                        |            |                            |                              |

| Voluntary task                                                   | Adaptation to reduce difficulty                    | Adaptation to increase difficulty                    | Perturbation                        | Outcome<br>(0= $\leq$ 2 steps, 1=multi step, X=loss of balance) | RPC | # Rests during task | Rest after task (Y/N) |
|------------------------------------------------------------------|----------------------------------------------------|------------------------------------------------------|-------------------------------------|-----------------------------------------------------------------|-----|---------------------|-----------------------|
| Move to different corners of the room, obstacles around the room | <input type="checkbox"/> Walk slowly               | <input type="checkbox"/> Walk quickly                | 12 multi-directional push/pull/trip |                                                                 |     |                     |                       |
| Four square stepping to unpredictable cued direction             | <input type="checkbox"/> Short steps               | <input type="checkbox"/> Long steps                  | 12 multi-directional push/pull/trip |                                                                 |     |                     |                       |
| 'Dodgeball'                                                      | <input type="checkbox"/> Ball thrown at upper body | <input type="checkbox"/> Ball thrown rapidly at feet | internal                            |                                                                 |     |                     |                       |

HR: \_\_\_\_\_

BP: \_\_\_\_\_

Overall rating of perceived challenge: \_\_\_\_\_

|                        |    |  |  |  |  |
|------------------------|----|--|--|--|--|
| <b>TOTALS/AVERAGES</b> | 0= |  |  |  |  |
|                        | 1= |  |  |  |  |
|                        | X= |  |  |  |  |

Overall comments for the session: \_\_\_\_\_  
 \_\_\_\_\_  
 \_\_\_\_\_  
 \_\_\_\_\_

**Booster sessions**

|                      |            |                       |            |                       |            |
|----------------------|------------|-----------------------|------------|-----------------------|------------|
| <b>Initial - HR:</b> | <b>BP:</b> | <b>Repeat 1 - HR:</b> | <b>BP:</b> | <b>Repeat 2 - HR:</b> | <b>BP:</b> |
|----------------------|------------|-----------------------|------------|-----------------------|------------|

| <b>Voluntary task</b>                                       | <b>Adaptation to reduce difficulty</b>                 | <b>Adaptation to increase difficulty</b>                     | <b>Perturbation</b>                  | <b>Outcome</b><br>(0= $\leq 2$ steps, 1=multi step, X=loss of balance) | <b>RPC</b> | <b># Rests during task</b> | <b>Rest after task (Y/N)</b> |
|-------------------------------------------------------------|--------------------------------------------------------|--------------------------------------------------------------|--------------------------------------|------------------------------------------------------------------------|------------|----------------------------|------------------------------|
| Standing still with feet hip-width apart, eyes closed       | <input type="checkbox"/> Wide base of support          | <input type="checkbox"/> Feet together                       | 6 multi-directional lean-and-release |                                                                        |            |                            |                              |
| Rapid tap-ups forward with alternate feet                   | <input type="checkbox"/> Low step<br>Step Height: ____ | <input type="checkbox"/> Unstable surface (e.g. soccer ball) | 6 multi-directional push/pull        |                                                                        |            |                            |                              |
| Rapid tap-ups to alternate sides                            | <input type="checkbox"/> Low step<br>Step Height: ____ | <input type="checkbox"/> Unstable surface (e.g. soccer ball) | 6 multi-directional push/pull        |                                                                        |            |                            |                              |
| Rapid stepping with alternate feet in random cued direction | <input type="checkbox"/> Short steps                   | <input type="checkbox"/> Long steps                          | 6 multi-directional push/pull        |                                                                        |            |                            |                              |
| Turning on the spot, in cued direction                      | <input type="checkbox"/> Turn slowly                   | <input type="checkbox"/> Turn quickly; eyes closed           | 6 multi-directional push/pull        |                                                                        |            |                            |                              |
| Side stepping/braiding                                      | <input type="checkbox"/> Short steps                   | <input type="checkbox"/> Long steps; thin foam mat           | 6 multi-directional push/pull/trip   |                                                                        |            |                            |                              |
| Forward tandem/braiding                                     | <input type="checkbox"/> Steps close to line           | <input type="checkbox"/> Long steps; thin foam mat           | 6 multi-directional push/pull/trip   |                                                                        |            |                            |                              |

| Voluntary task                                                                | Adaptation to reduce difficulty              | Adaptation to increase difficulty                           | Perturbation                                                  | Outcome<br>(0= $\leq 2$ steps, I=multi step, X=loss of balance) | RPC | # Rests during task | Rest after task (Y/N) |
|-------------------------------------------------------------------------------|----------------------------------------------|-------------------------------------------------------------|---------------------------------------------------------------|-----------------------------------------------------------------|-----|---------------------|-----------------------|
| Backward tandem/braiding                                                      | <input type="checkbox"/> Steps close to line | <input type="checkbox"/> Long steps; thin foam mat          | 6 multi-directional push/pull/trip                            |                                                                 |     |                     |                       |
| Walking with sudden stops and changes in direction, obstacles around the room | <input type="checkbox"/> Walk slowly         | <input type="checkbox"/> Walk quickly                       | 6 multi-directional push/pull/trip                            |                                                                 |     |                     |                       |
| Kicking soccer ball against wall                                              | [none]                                       | <input type="checkbox"/> Kick outside BOS; on thin foam mat | 6 perturbations: PT attempts to take ball, nudges participant |                                                                 |     |                     |                       |

HR: \_\_\_\_\_ BP: \_\_\_\_\_ Overall rating of perceived challenge: \_\_\_\_\_

|                        |    |  |  |  |  |
|------------------------|----|--|--|--|--|
| <b>TOTALS/AVERAGES</b> | 0= |  |  |  |  |
|                        | I= |  |  |  |  |
|                        | X= |  |  |  |  |

**Overall comments for the session:** \_\_\_\_\_  
 \_\_\_\_\_  
 \_\_\_\_\_  
 \_\_\_\_\_

## 5. TASK DESCRIPTIONS

### Types of external perturbations

#### 1) Lean and release

**a. Forward-directed lean-and-release perturbation.** The participant stands facing the physiotherapist, leaning forward with some of his body weight supported by the physiotherapist. He should be leaning far enough forward that his shoulders and hips are ahead of his toes; however, smaller lean angles can be used with more impaired individuals. The physiotherapist's hands are on the participants' shoulders. At an unexpected time, the physiotherapist releases her hands and the participant starts to fall forward, requiring a step to regain stability. The goal is for the participant to take as few steps as possible to recover.

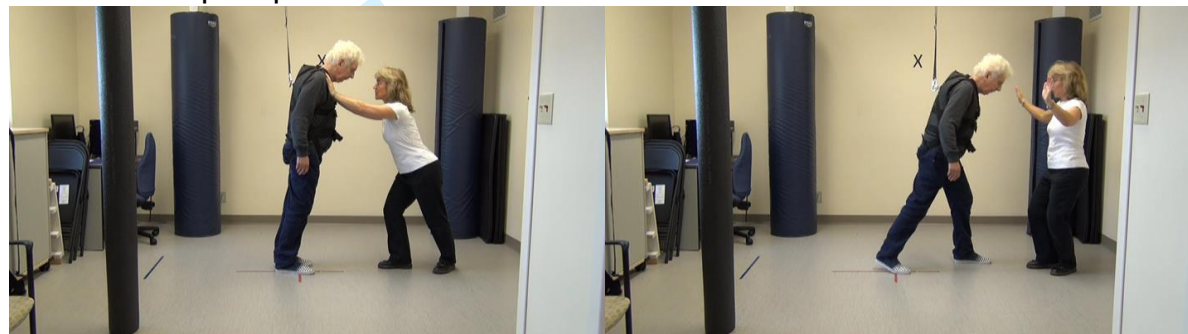

**Figure 6.1. Forward-directed lean-and-release perturbation.** The participant leans forward and the physiotherapist supports his weight (left). The physiotherapist releases her support and the participant steps to recover his balance (right).

**b. Backward-directed lean-and-release perturbation.** The participant stands in front of and facing away from the physiotherapist, leaning backward with some of his body weight supported by the physiotherapist. He should be leaning far enough backward that his shoulders and hips are behind his heels; however, smaller lean angles can be used with more impaired individuals. The physiotherapist's hands are on the participants' shoulders. At an unexpected time, the physiotherapist releases her hands and the participant starts to fall backward, requiring a step to regain stability. The goal is for the participant to take as few steps as possible to recover upright standing balance.

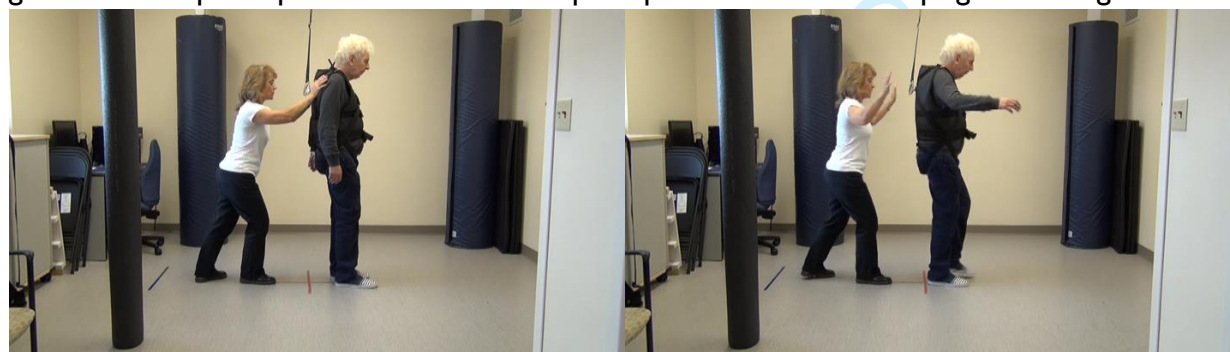

**Figure 6.2. Backward-directed lean-and-release perturbation.** The participant leans backward and the physiotherapist supports his weight (left). The physiotherapist releases her support and the participant steps to recover his balance (right).

**c. Lateral-directed lean-and-release perturbation.** The participant stands with his feet close together, leaning to the right (or left) with some of his body weight supported by the physiotherapist's hands. He should be leaning far enough to the right (or left) that the midline of the pelvis is aligned over the right (or left) foot; however, smaller lean angles can be used with more impaired individuals. The physiotherapist's hands are on the participant's right (or left) shoulder and

1  
2 right (or left) hip. At an unexpected time, the physiotherapist releases her hands and the participant  
3 starts to fall to the right (or left), requiring a step to regain stability. The goal is for the participant to  
4 take as few steps as possible to recover balance.  
5

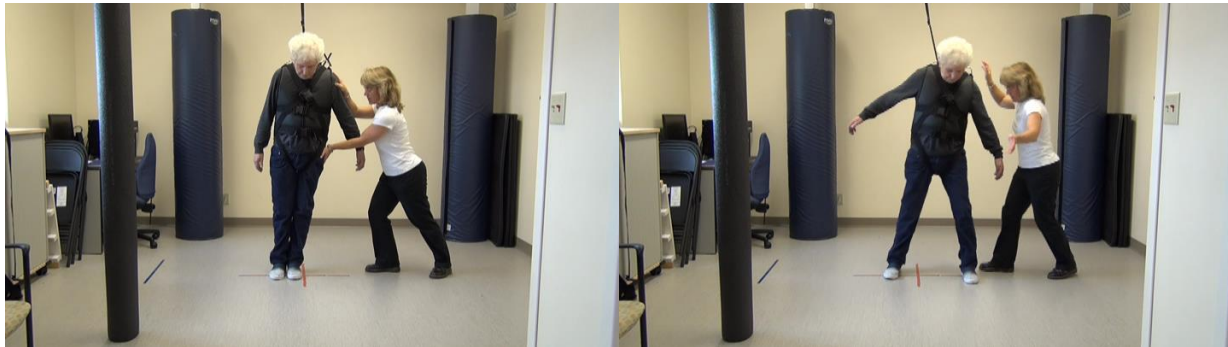

16 **Figure 6.3. Backward-directed lean-and-release perturbation.** The participant leans to the left and the  
17 physiotherapist supports his weight (left). The physiotherapist releases her support and the participant steps to recover  
18 his balance (right).  
19

20  
21 2) Multi-directional push/pull/trip

22  
23 **a. Multidirectional push.** The physiotherapist places her hands on the participant's hips or  
24 shoulders and pushes him forward, requiring a reactive step to regain stability. Alternatively, one of  
25 the physiotherapist's hands could be on the hip and the other on the shoulder; a push forward at the  
26 level of one scapula would facilitate a diagonal reactive step. In all scenarios, the physiotherapist  
27 should be ready to assist with the recovery, if necessary, by having a light hold of the safety harness.  
28 The physiotherapist should only provide assistance if the participant is unable to regain stability  
29 independently; this is true with every reaction. Note that backward-directed pushes are not  
30 performed.  
31

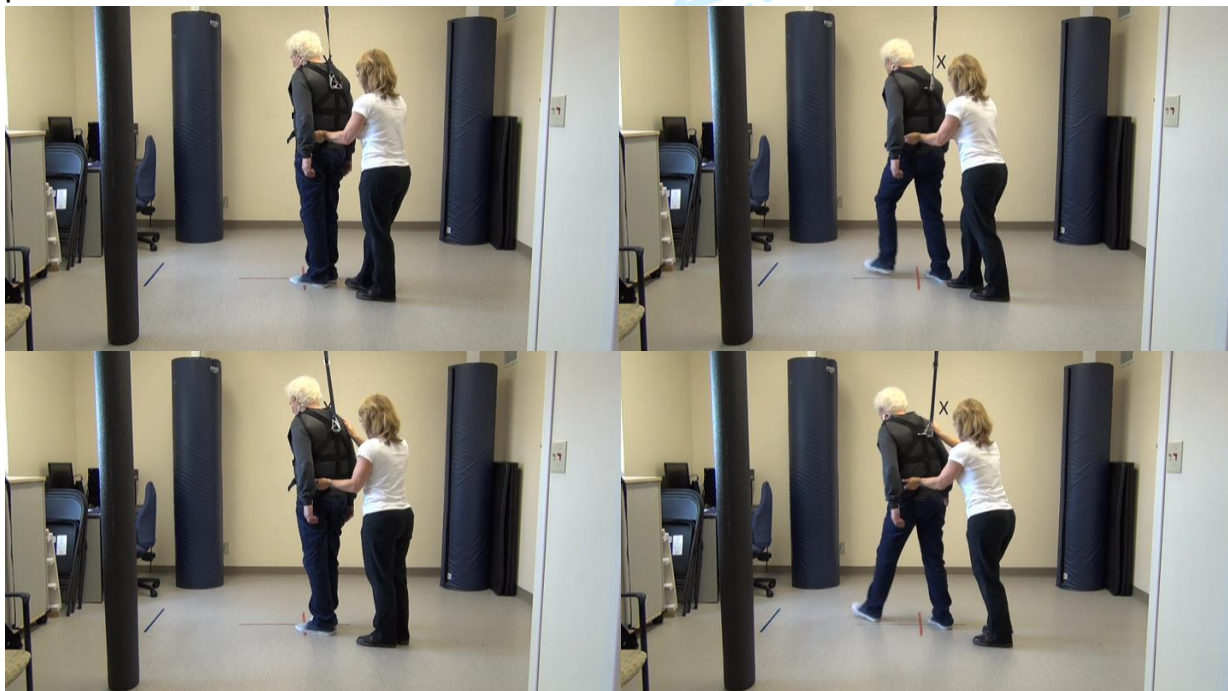

53 **Figure 6.4. Forward-directed push perturbation.** The physiotherapists' hands may be placed at the hips (top images)  
54 or with one hand on the hips and one on the shoulders.  
55  
56  
57  
58



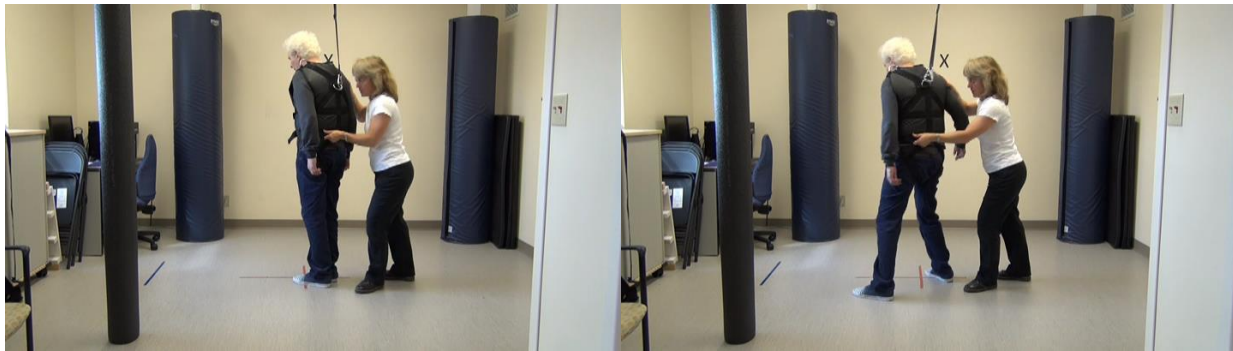

13 **Figure 6.5. Lateral-directed push perturbation.** The physiotherapist places her hands on the participant's right (or  
14 left) hip or shoulder and pushes him to the left (or right), requiring a reactive step to regain stability.

15  
16 **b. Multi-directional pull perturbation.** The physiotherapist may pull the participant's shoulders or  
17 pull on the harness to cause the participant to start to fall forward, requiring a reactive step to regain  
18 stability.

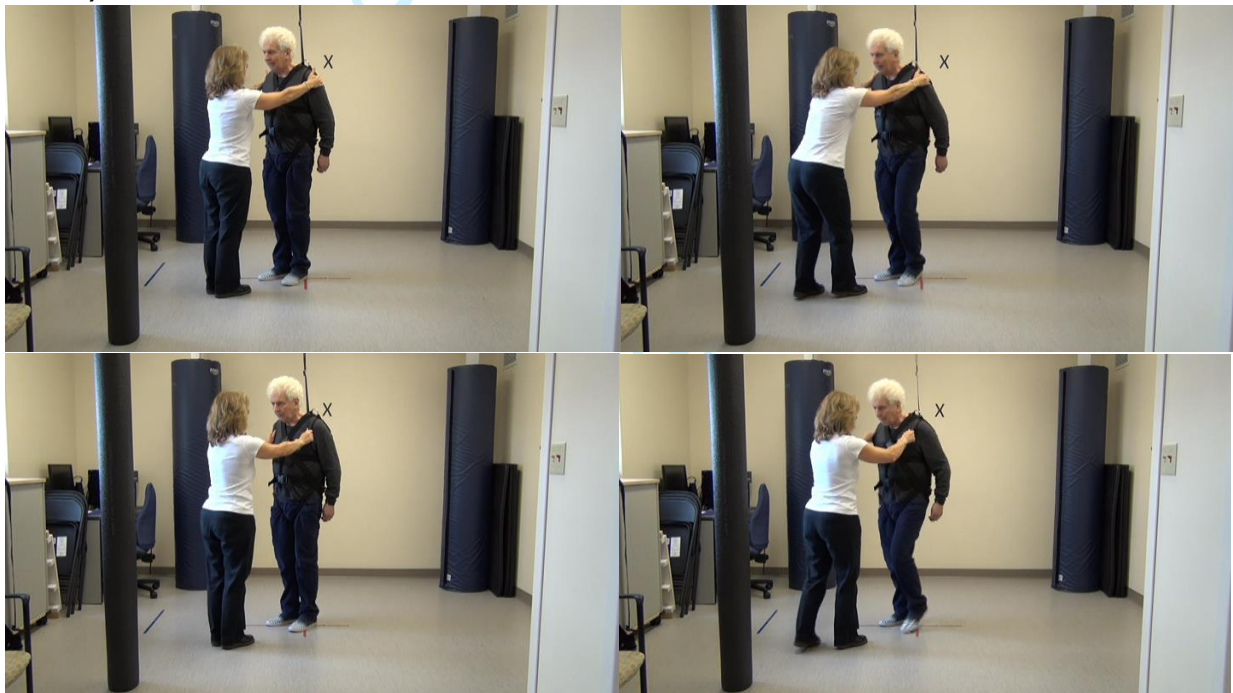

41 **Figure 6.6. Forward-directed pull perturbation.** The physiotherapist places her hands on the participant's shoulders  
42 (top) or pulls on the harness (bottom).

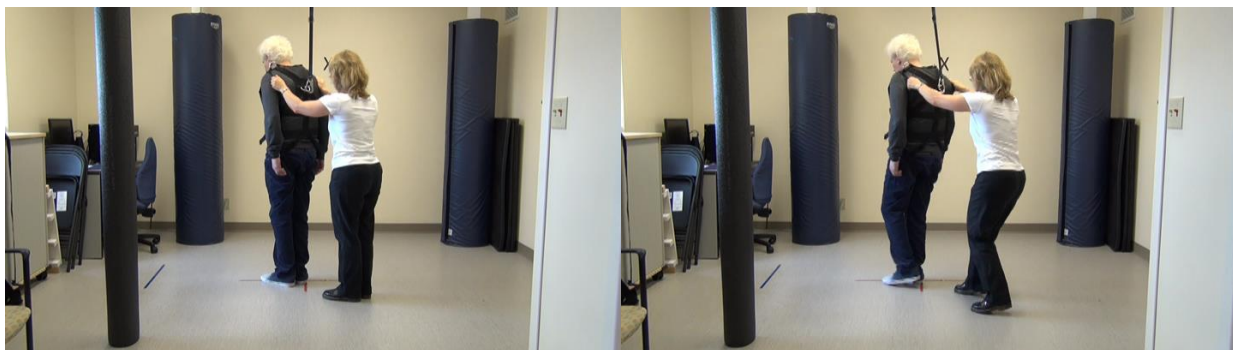

55 **Figure 6.7. Backward-directed pull perturbation.** The physiotherapist uses the shoulders, hips, or harness to pull  
56 the participant backward, requiring a reactive step to regain stability.

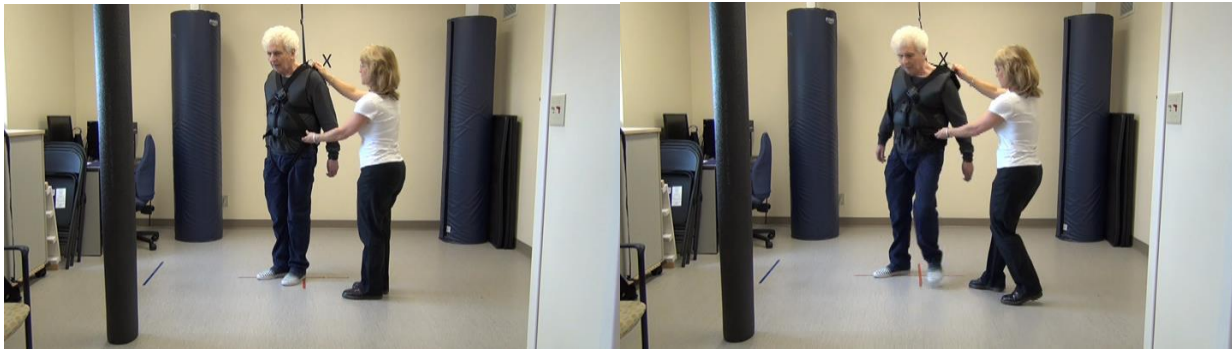

**Figure 6.8. Lateral-directed pull perturbation.** The physiotherapist uses the shoulders, hips or harness, to pull the participant to the right (or left), requiring a reactive step to regain stability.

**c. Trip perturbation while walking.** As the participant walks (forward, backward, sideways), the physiotherapist places her foot in the path of the swing limb causing a trip. A reactive step is required to regain stability. A second person is recommended in this scenario as it is difficult for the physiotherapist doing the tripping to be in a place to provide support should it be needed.

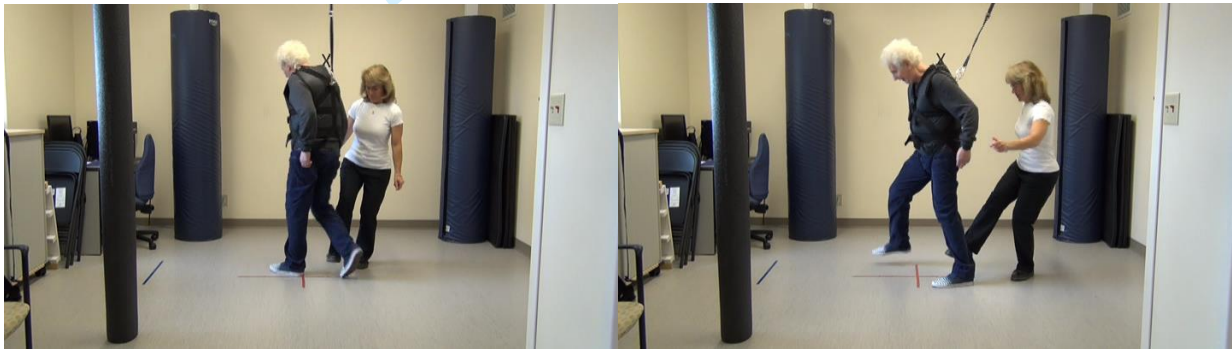

**Figure 6.9. Trip perturbation.** The physiotherapist catches the participants' limb with her foot while walking.

## Descriptions of voluntary tasks

**Standing still with feet hip-width apart** – participant stands unassisted with the eyes open and the feet positioned as wide as the hips. The lean-and-release perturbations are performed in random directions (forward, backward and lateral).

Adaptation to reduce difficulty – have participant adopt a wider base of support (BOS)

Adaptation to increase difficulty – have participant stand with the feet together

Progressions of this task:

Eyes closed – if participant is unable, the lights in the room should be dimmed (alternatively, dark sunglasses may be worn)

Standing on a thin foam mat

Standing on a thick foam mat

Turning head to the right and left – to spot a target

Looking up and down – to spot a target

Counting backwards by 3's – from a random number given by physiotherapist

Eyes closed and counting backwards – as written above, but combined

**Rapid weight-shifting left and right** – participant shifts his body weight from one foot to the other as quickly as possible, and the feet remain in contact with the floor. The task is repeated until all perturbations are accomplished.

Adaptation to reduce difficulty – have participant adopt a wider BOS



Adaptation to increase difficulty – have participant stand with the feet together

**Rapid weight-shifting forward and backward** – participant stands with feet either ‘side-by-side’ or in a ‘stride position’ and shifts his body weight forward and backward; if feet are ‘side-by-side’ then body weight rocks from toes to heels and back; if feet are in stride then body weight transfers from one foot to the other as quickly as possible; part of each foot always remains in contact with the floor. The task is repeated until all perturbations are accomplished.

Adaptation to reduce difficulty – have participant adopt a wider BOS, with the feet either side-by-side or in stride

Adaptation to increase difficulty – have participant stand with the feet together (if side-by-side) or with the feet in tandem (if in stride position)

**Throwing and catching a ball** – if the participant has use of both arms he should catch and throw a ball back and forth with the physiotherapist; if the participant has functional use of only one arm he should hit a ball back that has been thrown by the physiotherapist.

Adaptation to reduce difficulty – have participant adopt a wider BOS

Adaptation to increase difficulty – have participant stand with the feet together

**Rapid arm raises forward and to the sides** – participant raises one arm, then both arms, to 90 degrees of shoulder flexion as quickly as possible and stops as quickly as possible; participant raises two arms, then one arm at a time, to 90 degrees of shoulder abduction as quickly as possible and stops as quickly as possible.

Adaptation to reduce difficulty – have participant adopt a wider BOS

Adaptation to increase difficulty – have participant stand with the feet together

**Rapid stepping forward with alternate feet** – participant steps forward as quickly as possible with the right foot then returns it to the starting position, then steps forward as quickly as possible with the left foot, and then returns it to the starting position; there should be a transfer of body weight to the stepping foot once it touches down in the forward position. The task is repeated until all perturbations are accomplished.

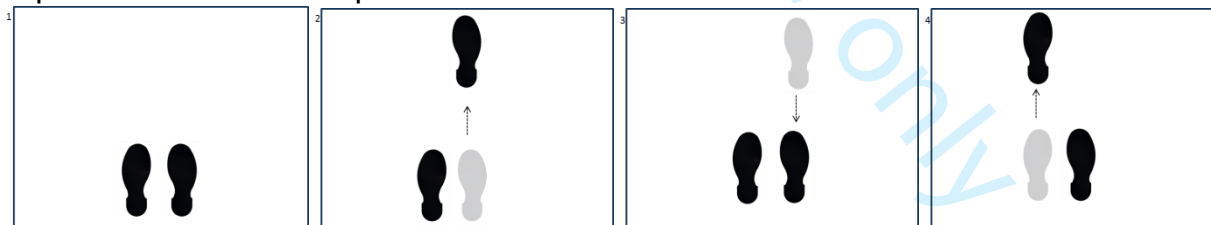

Figure 6.10. Rapid stepping forward with alternate feet

Adaptation to reduce difficulty – have participant take short steps

Adaptation to increase difficulty – have participant take long steps

Progressions of this task:

Standing on a thin foam mat

**Rapid stepping backward with alternate feet** – participant steps backward as quickly as possible with the right foot, then returns it to the starting position, then steps backward as quickly as possible with the left foot, and then returns it to the starting position; there should be a transfer of body weight to the stepping foot once it touches down in the backward position. The task is repeated until all perturbations are accomplished.

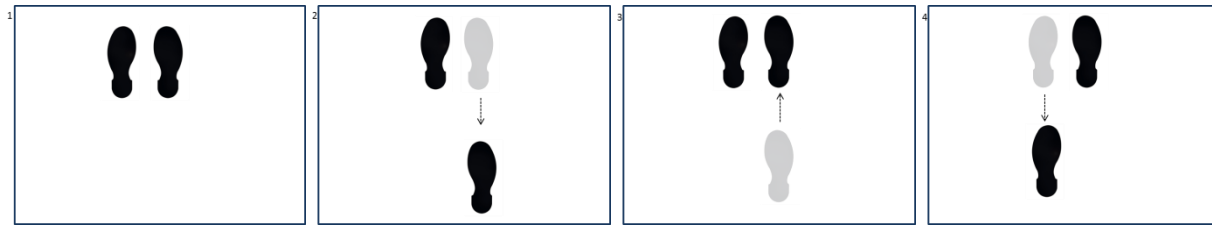

Figure 6.11. Rapid stepping backward with alternate feet

Adaptation to reduce difficulty – have participant take short steps

Adaptation to increase difficulty – have participant take long steps

Progressions of this task:

Standing on a thin foam mat

**Rapid stepping to the right (right foot)** – participant steps with the right foot to the right as quickly as possible, then back to the starting position; there should be transfer of body weight to the right foot once it touches down in the lateral position. The task is repeated until all perturbations are accomplished.

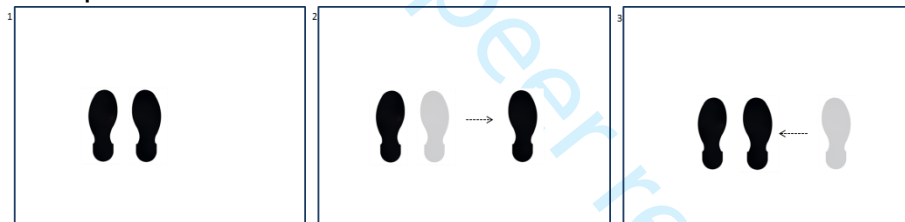

Figure 6.12. Rapid stepping to the right (right foot)

Adaptation to reduce difficulty – have participant take short steps

Adaptation to increase difficulty – have participant take long steps

**Rapid stepping to the left (left foot)** – participant steps with the left foot to the left as quickly as possible, then back to the starting position; there should be transfer of body weight to the left foot once it touches down in the lateral position. The task is repeated until all perturbations are accomplished.

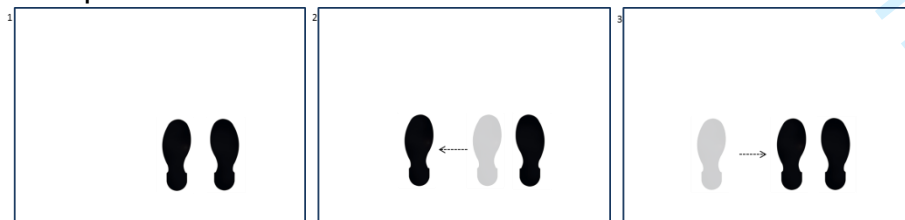

Figure 6.13. Rapid stepping to the left (left foot)

Adaptation to reduce difficulty – have participant take short steps

Adaptation to increase difficulty – have participant take long steps

**Rapid stepping to alternate sides**– participant steps with the right foot to the right as quickly as possible (including body weight transfer), then back to the starting position; then he steps with the left foot to the left as quickly as possible (including body weight transfer), then back to the starting position. The task is repeated until all perturbations are accomplished.

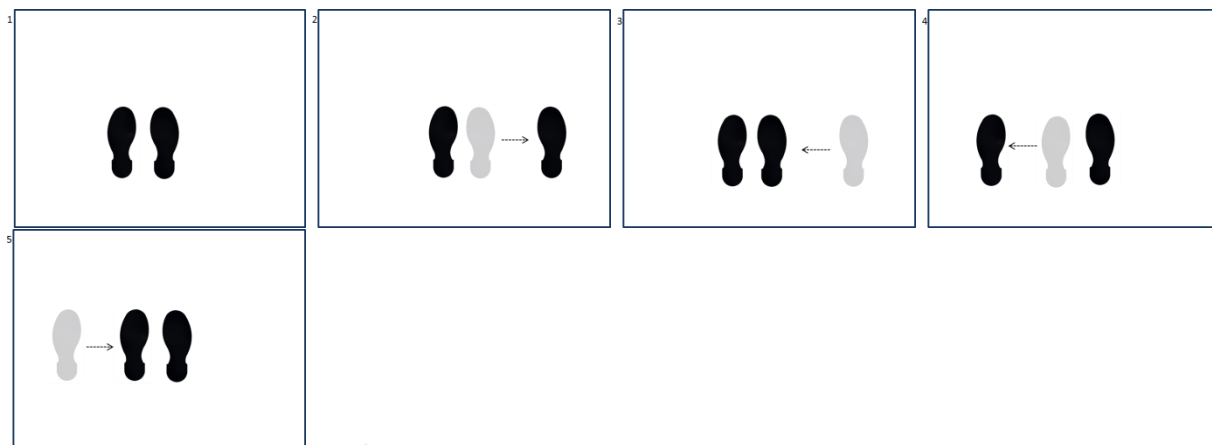

Figure 6.14. Rapid stepping to alternate sides

Adaptation to reduce difficulty – have participant take short steps

Adaptation to increase difficulty – have participant take long steps

Progressions of this task:

Standing on a thin foam mat

**Rapid tap-ups forward with alternate feet** – participant stands with a step in front of his feet; he lifts up the right foot and lightly touches the step, then places it back on the floor; then he lifts up the left foot and lightly touches the step, then places it back on the floor. The goal is to maintain the body weight over the stance limb, i.e. no transfer of body weight forward. The task is repeated until all perturbations are accomplished.

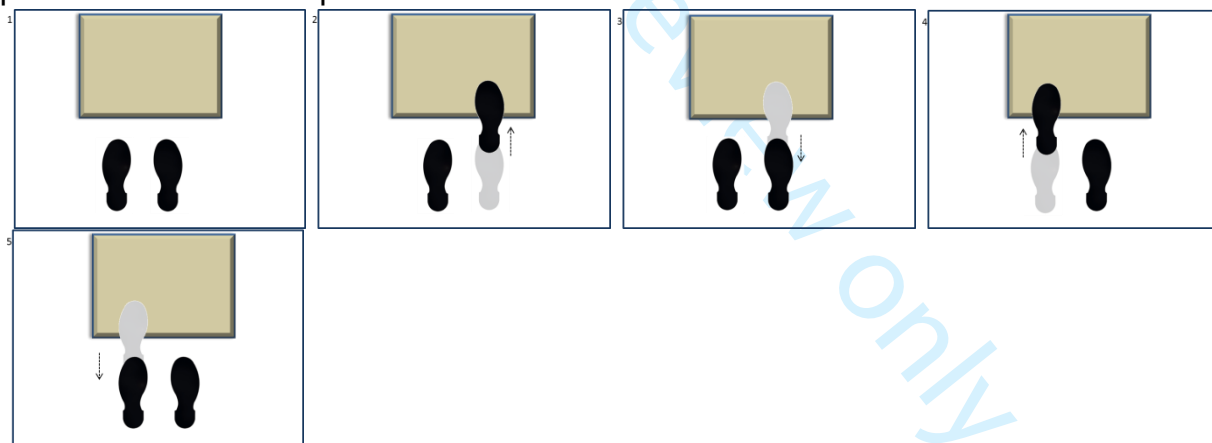

Figure 6.15. Rapid tap-ups forward with alternate feet

Adaptation to reduce difficulty – have participant tap-up to a low step

Adaptation to increase difficulty – have participant tap-up to an unstable surface, e.g. a soccer ball

Progressions of this task:

Standing on a thin foam mat

**Walking in place** – participant alternates stepping with the right and the left foot. The participant should not move from the spot, though a small amount of ‘drift’ is typical. The task is repeated until all perturbations are accomplished.

Adaptation to reduce difficulty – have participant step with minimal height from floor

Adaptation to increase difficulty – have participant step with maximum height from floor, i.e. knees raised to hip-height

Progressions of this task:

Walking on the spot on a thin foam mat

Eyes closed – if participant is unable, the lights in the room should be dimmed

Increased speed to 'jogging', or fast walking, on the spot

Jogging, or fast walking, on the spot on a thin foam mat

**Rapid stepping forward and backward with the right foot** – participant shifts his body weight to the left foot and then steps forward with the right foot, shifting some body weight forward but not enough to completely unweight the left; then the participant shifts his body weight back to the left foot in order to take a full step as far backward as possible with the right foot, and accepts some body weight on the right. The task is repeated until all perturbations are accomplished.

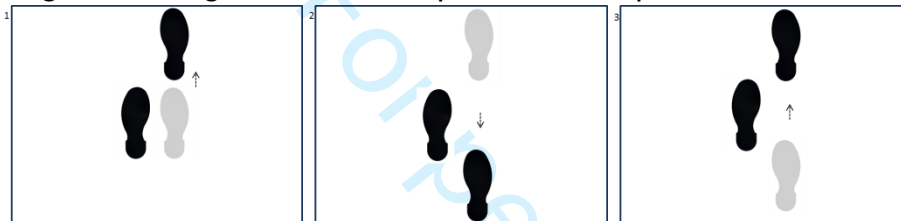

Figure 6.16. Rapid stepping forward and backward with the right foot

Adaptations to reduce difficulty – have participant take short steps; have participant rest momentarily between transitioning from front to back or from back to front

Adaptation to increase difficulty – have participant take long steps

Progressions of this task:

Standing on a thin foam mat

**Rapid stepping forward and backward with the left foot** – participant shifts his body weight to the right foot and then steps forward with the left foot, shifting some body weight forward but not enough to completely unweight the right; then the participant shifts his body weight back to the right foot in order to take a full step as far backward as possible with the left foot, and accepts some body weight on the left. The task is repeated until all perturbations are accomplished.

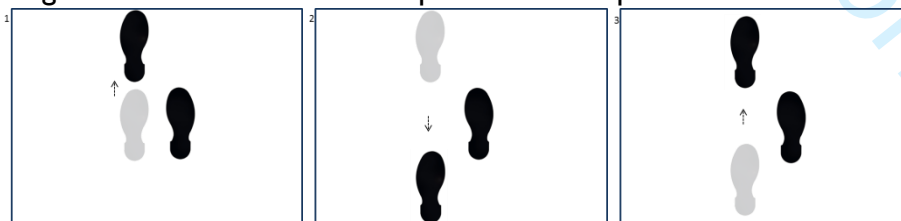

Figure 6.17. Rapid stepping forward and backward with the left foot

Adaptations to reduce difficulty – have participant take short steps; have participant rest momentarily between transitioning from front to back or from back to front

Adaptation to increase difficulty – have participant take long steps

Progressions of this task:

Standing on a thin foam mat

**Rapid step-ups with alternate feet** - participant stands with a step in front of his feet; he steps up onto the step with the right foot, shifts his body weight forward and steps up with the left foot, placing it on the step in a comfortably-wide position; then he steps down with the right foot, shifts his

body weight back onto the right foot and steps down with the left. The process is repeated with the right foot leading until 3 perturbations are completed; then the left leads until the final 3 perturbations are completed.

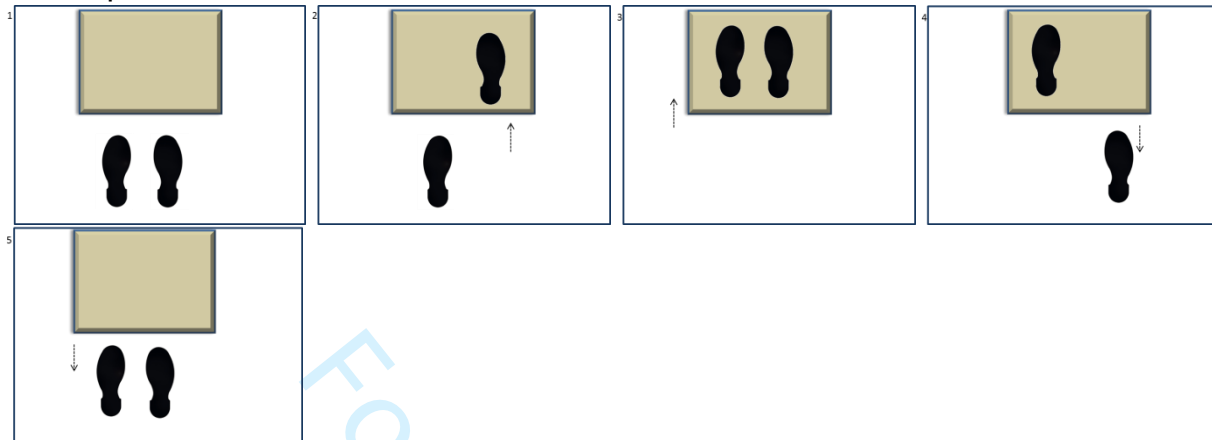

Figure 6.18. Rapid step-ups with alternate feet

Adaptation to reduce difficulty – have participant step-up to a low step

Adaptation to increase difficulty – have participant step-up to an unstable surface, for e.g., a step placed on a thin foam mat, or thick foam pad

Progressions of this task:

Standing on a thin foam mat – i.e. the person is standing on the mat, but the step may be on a hard surface, depending on the adaptation for difficulty

**Rapid tap-ups to alternate sides** – participant stands with a step lateral to each foot; he lifts up the right foot and lightly touches the step on the right, then places it back on the floor; then lifts up the left foot and lightly touches the step on the left, then places it back on the floor. The goal is to maintain the body weight over the stance limb, i.e., no transfer of body weight to the side tapping-up. The task is repeated until all perturbations are accomplished.

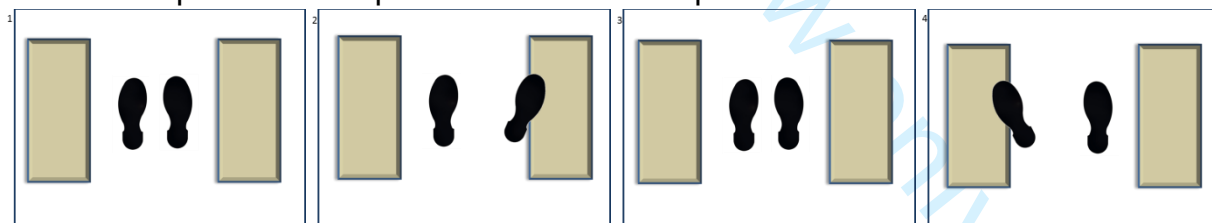

Figure 6.19. Rapid tap-ups to alternate sides

Adaptation to reduce difficulty – have participant tap-up to a low step

Adaptation to increase difficulty – have participant tap-up to an unstable surface, e.g. a soccer ball

Progressions of this task:

Standing on a thin foam mat – i.e. the person is standing on the mat, but the step/obstacle may be on a hard surface, depending on the adaptation for difficulty

**Rapid diagonal forward stepping with alternate feet** – participant steps diagonally forward (a 45° angle) as quickly as possible with the right foot, then returns it to the starting position, then steps diagonally forward as quickly as possible with the left foot, then returns it to the starting position; there should be a transfer of body weight to the stepping foot once it touches down in the diagonal position. The task is repeated until all perturbations are accomplished.

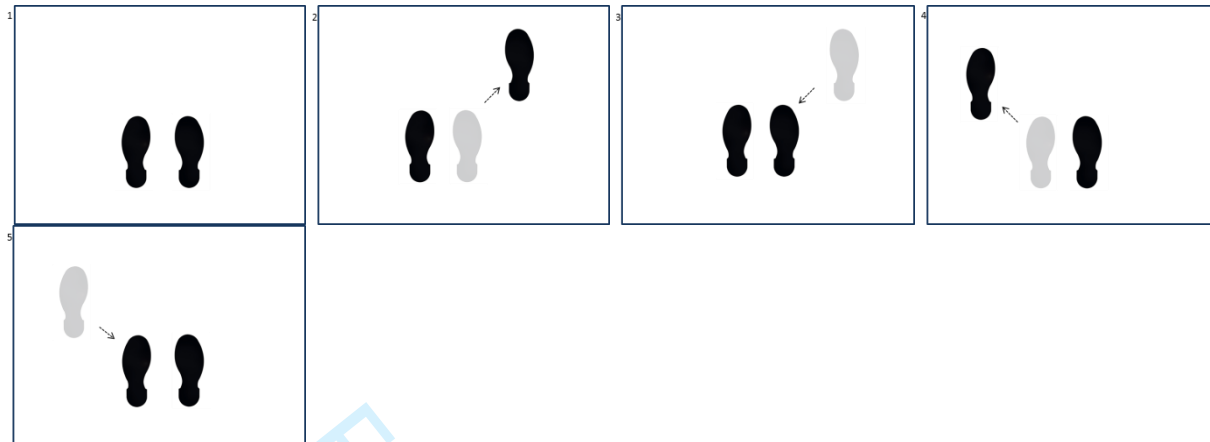

**Figure 6.20. Rapid diagonal forward stepping with alternate feet**

Adaptation to reduce difficulty – have participant take short steps

Adaptation to increase difficulty – have participant take long steps

Progressions of this task:

Standing on a thin foam mat

**Rapid stepping with alternate feet in random physiotherapist-cued directions** – participant stands in the centre of 6 targets placed on the floor (e.g., different colored Agility Dots); physiotherapist calls out a color and the participant steps to the colored dot with one foot (transferring some body weight) and then returns that foot to the centre; the process repeats with the next randomly called color. The task is repeated until all perturbations are accomplished.

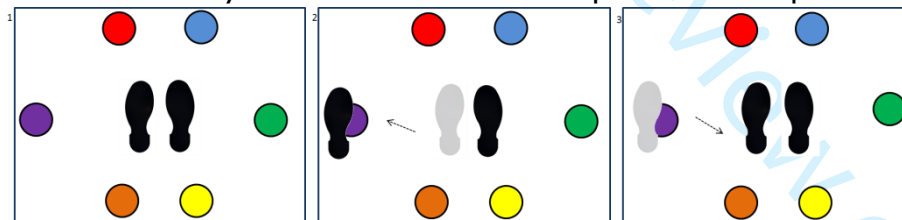

**Figure 6.21. Rapid stepping with alternate feet in random physiotherapist-cued directions**

Adaptation to reduce difficulty – targets require short steps

Adaptation to increase difficulty – targets require long steps

Progressions of this task:

Standing on a thin foam mat

**Walking forward** – participant takes steps to travel in a forward direction. Walking continues until all perturbations are accomplished.

Adaptations to reduce difficulty – have participant take short steps, or walk slowly

Adaptation to increase difficulty – have participant take long steps; traffic light\*

Progressions of this task:

Turning head to the right and left – to spot a target

Looking up and down – to spot a target

Stepping over obstacles –e.g. pool noodles

\* Traffic Light = participant walks at a fast pace like he would if crossing a street; physiotherapist counts down like the traffic light would in the crosswalk

Eyes closed – if participant is unable, the lights in the room should be dimmed  
Walking on a thin foam mat

**Forward braiding** – participant takes a step forward with the right foot that crosses the midline path and lands lateral to, and slightly ahead of, the left foot; then he brings the left foot out and around the right foot, taking a step across the midline path that lands lateral to, and slightly ahead of, the right foot; then the process repeats until all perturbations are accomplished.

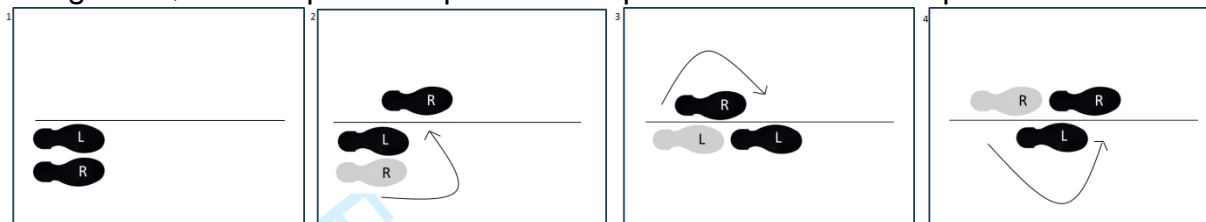

Figure 6.22. Forward braiding

Adaptation to reduce difficulty – walk on the line

Adaptations to increase difficulty - increase distance of step across line; take bigger steps; increase the walking speed

Progressions of this task:

Walking on a thin foam mat

**Side stepping** – participant stands on left side of room; he takes a step to the right with the right foot, followed by a step to the right (medially) with the left foot; the stepping continues until the edge of the room/available space is reached; then, starting from the right side of the room, he will walk in the opposite direction – left foot steps to left, followed by right foot stepping to left. Stepping continues until all perturbations are accomplished.

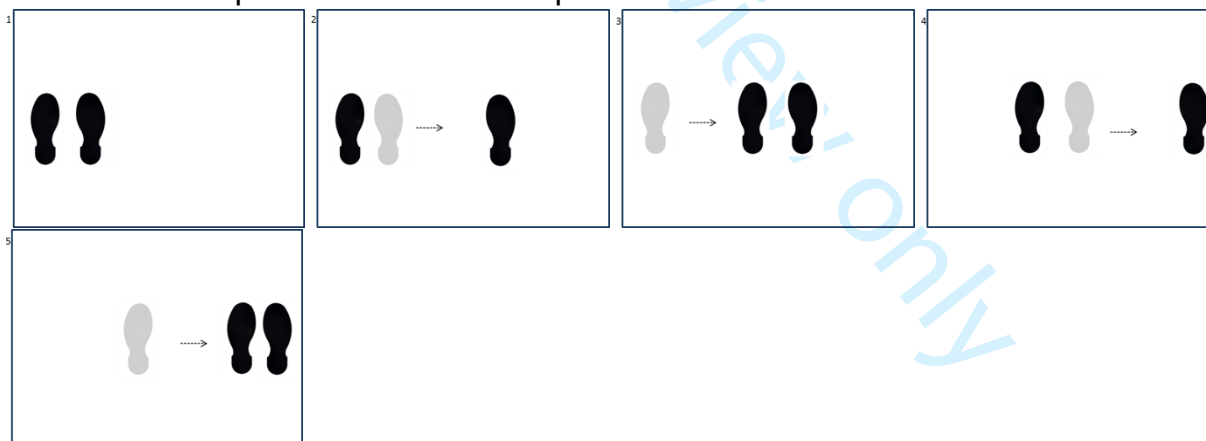

Figure 6.23. Side stepping

Adaptation to reduce difficulty – have participant take short steps

Adaptation to increase difficulty – have participant take long steps

Progressions of this task:

Stepping over obstacles –e.g. pool noodles

Walking on a thin foam mat

**Turning on the spot, alternating to the right and left** – participant takes steps to turn continuously in a clockwise direction. After a few turns (or 3 perturbations) the participant changes direction and turns counter-clockwise (until the final 3 perturbations are completed).



Adaptation to reduce difficulty – have participant turn slowly

Adaptations to increase difficulty – have participant turn quickly

Progressions of this task:

Eyes closed – if participant is unable, the lights in the room should be dimmed

Cued direction – physiotherapist calls out 'right' or 'left' and the participant turns in the direction called; it may be the same direction or a change in direction

Cued and Eyes closed – as written above but combined

**Four square stepping** – using tape, a cross is marked out on the floor creating 4 squares; participant stands in the bottom right-hand square facing forward; he is asked to step forward over the line with one foot then the other into the top right-hand square; then to step sideways, over the tape with the left foot and then the right into the top left-hand square; then to step backwards with one foot and then the other into the bottom left-hand square; and then finally, to step sideways with the right foot, then the left into the bottom right-hand square. He does that pattern a few times (or 3 perturbations) and then switches directions, moving in a clockwise pattern (until the final 3 perturbations are completed).

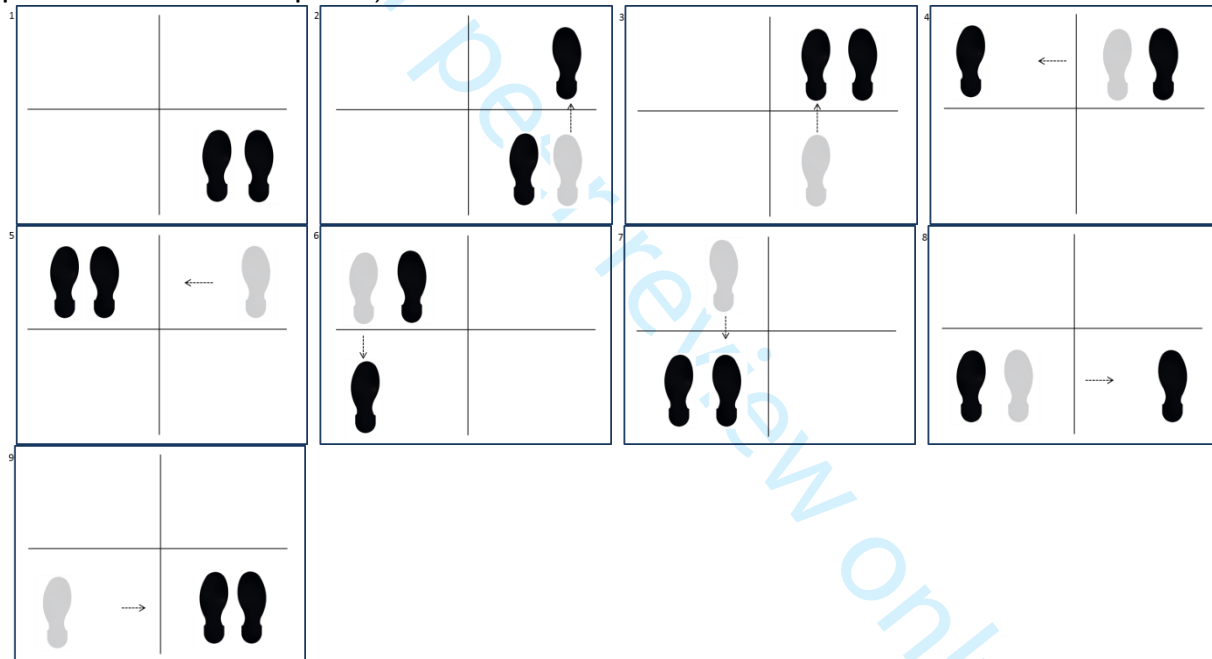

Figure 6.24. Four square stepping

Adaptation to reduce difficulty – have participant take short steps over the lines

Adaptation to increase difficulty – have participant take long steps over the lines

Progressions of this task:

Stepping on a thin foam mat

Cued direction – physiotherapist calls out 'change' or 'switch' and the participant begins moving in the opposite direction

**Walking backward** – participant takes steps to travel in a backward direction. Walking continues until all perturbations are accomplished.

Adaptation to reduce difficulty – have participant take short steps, or walk slowly

Adaptation to increase difficulty – have participant take long steps; traffic light

Progressions of this task:

Walking on a thin foam mat



**Tandem walking forward** - participant takes a step forward with the right foot and places the right heel ahead of the left toes; then he brings the left foot out and around the right foot, and places the left heel ahead of the right toes; then the process repeats until all perturbations are completed.

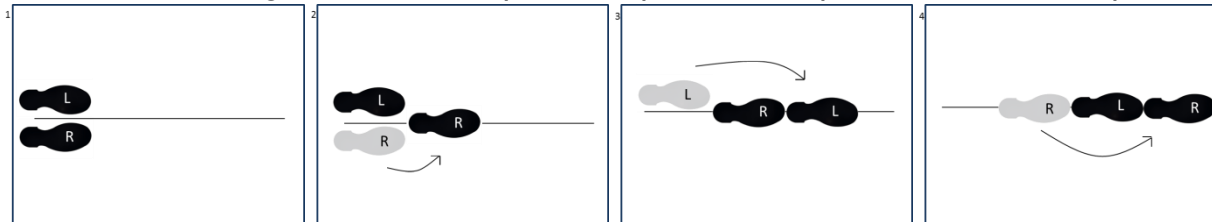

**Figure 6.25. Tandem walking**

Adaptations to reduce difficulty – participant takes longer steps (i.e. heel and toes don't touch) or participant places feet close to the line but not on the line

Adaptation to increase difficulty – traffic light

Progressions of this task:

Walking on a thin foam mat

**Sideways braiding** – participant stands at the right edge of the room; he is asked to walk to the left; he takes a step with the right foot that crosses over the left foot and lands lateral to, and slightly ahead of, the left foot, with part of his foot on the midline; then he brings the left foot out from behind the right and steps to the left, landing on the midline; then he takes a step with the right foot that crosses behind the left foot and lands lateral to, and slightly behind, the left foot, with part of his foot on the midline; then he takes the left foot over the right foot and steps to the left; and then the process repeats until he walks as far as he possibly can within the available space. Then he is asked to do the opposite and walk to the right. This pattern continues until all perturbations are accomplished.

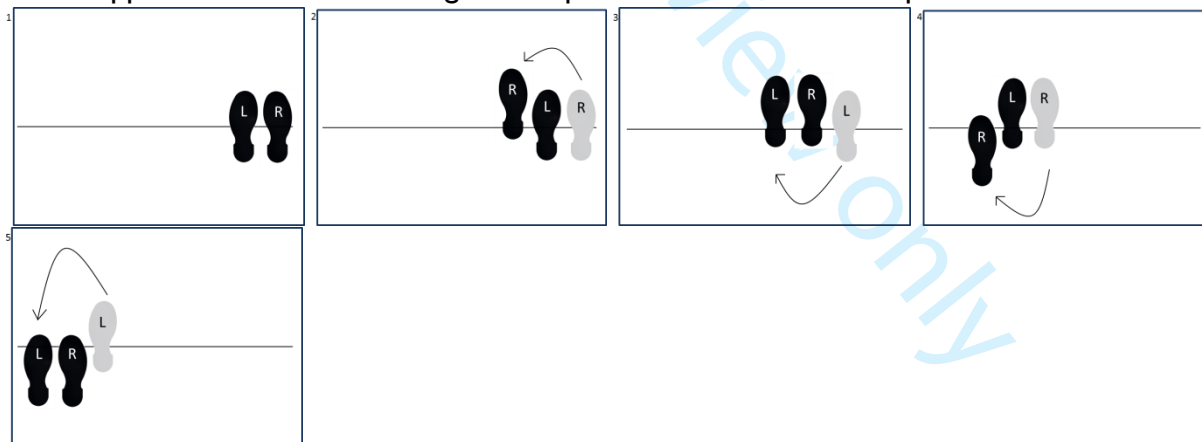

**Figure 6.26. Sideways braiding**

Adaptations to reduce difficulty – participant's foot does not fully cross over or behind the stance foot; or, participant's foot crosses but does not come into contact with midline

Adaptation to increase difficulty – traffic light

Progressions of this task:

Walking on a thin foam mat

**Tandem walking backward** - participant takes a step backward with the right foot and places the right toes behind the left heel; then he brings the left foot out and around the right foot, and places the left toes behind the right heel; then the process repeats until all perturbations are completed.

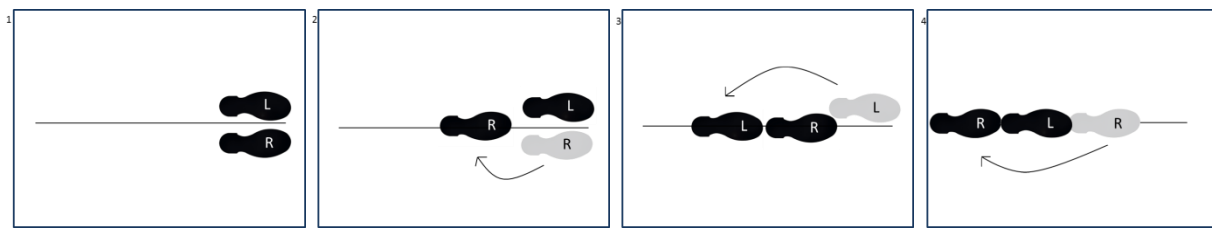

Figure 6.27. Tandem walking backward

Adaptations to reduce difficulty – participant takes longer steps (i.e. heel and toes don't touch) or participant places feet close to the line but not on the line

Adaptation to increase difficulty – traffic light

Progressions of this task:

Walking on a thin foam mat

**Backward braiding** – participant takes a step backward with the right foot that crosses the midline path and lands lateral to, and slightly behind, the left foot; then he brings the left foot out and around the right foot, taking a step backwards across the midline path that lands lateral to, and slightly behind, the right foot; then the process repeats until all perturbations are accomplished.

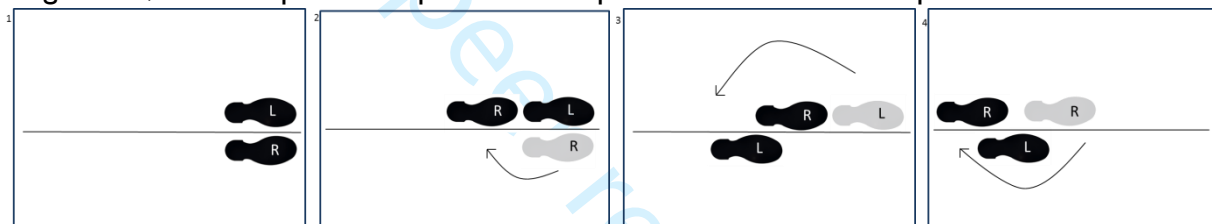

Figure 6.28. Backward braiding

Adaptation to reduce difficulty – walking on the line

Adaptations to increase difficulty - increase distance of step across line; take longer steps; traffic light

Progressions of this task:

Walking on a thin foam mat

**Kicking a soccer ball against wall** – participant stands at least 1 metre away from a wall; he kicks a soccer ball with enough force that it bounces back to him from the wall; he receives the ball and kicks it again. The task is repeated until all perturbations are accomplished.

Adaptation to reduce difficulty – none

Adaptations to increase difficulty – have participant stand further away from the wall; have participant kick it outside of his base of support; have participant alternate kicking with each foot

Progressions of this task:

Standing on a thin foam mat

Kicking the ball to the physiotherapist and receiving it back; this may require moving to reach the ball

Kicking the ball with the physiotherapist while standing on a thin foam mat

**Throwing a handball against the wall** – participant stands at least 1 metre away from a wall; he throws a hand ball with enough force that it bounces back to him from the wall; he receives the ball and throws it again. The task is repeated until all perturbations are accomplished.

Adaptation to reduce difficulty – have participant throw a large ball

1  
2 Adaptations to increase difficulty – have participant throw a small ball; have participant stand  
3 further away from the wall; have participant throw the ball with each arm

4 Progressions of this task:

5 Standing on a thin foam mat

6 Throwing the ball to the physiotherapist and receiving it back; this may require moving  
7 to catch it

8 Throwing the ball with the physiotherapist while standing on a thin foam mat  
9

10  
11 **Walking with sudden stops and changes in direction** – participant walks forward and at any  
12 time, the physiotherapist says ‘stop’, and the participant has to stop walking quickly, or says ‘right’  
13 (‘left’), and the participant has to turn to the right (left) and continue walking. The task continues until  
14 all perturbations are accomplished.

15 Adaptation to reduce difficulty – have participant walk slowly

16 Adaptation to increase difficulty – have participant walk quickly

17 Progressions of this task:

18 Stepping over obstacles, e.g. pool noodles or steps – the participant has to walk in the  
19 frame and manage the obstacles while also stopping or changing direction on command  
20  
21

22  
23 **Move to different corners of the room** – participant stands in the centre of the room facing  
24 forward; he is asked to move to one corner of the room (marked with different colored Agility Dots  
25 or numbers); he walks forward to the corners in front of him, then backward to return to the start  
26 position, or he walks backward to the corners behind him, then forward to return to the start  
27 position. The task continues until all perturbations are accomplished.

28 Adaptation to reduce difficulty – have participant walk slowly

29 Adaptation to increase difficulty – have participant walk quickly

30 Progressions of this task:

31 Stepping over obstacles, e.g. pool noodles or steps – the participant has to walk in the  
32 frame and manage the obstacles while making his way to the correct pole  
33  
34

35  
36 **Dodgeball** – the participant must avoid being hit by the ball that is being thrown at him by the  
37 physiotherapist. This requires transfer of weight and reactive stepping.

38 Adaptation to reduce difficulty – physiotherapist throws ball at upper body

39 Adaptation to increase difficulty – physiotherapist throws ball rapidly at participant’s feet  
40  
41  
42  
43  
44  
45  
46  
47  
48  
49  
50  
51  
52  
53  
54  
55  
56  
57  
58

**6. RATING OF PERCEIVED CHALLENGE SCALE**

|                           |                                                                                     |   |
|---------------------------|-------------------------------------------------------------------------------------|---|
| NO CHALLENGE AT ALL       | 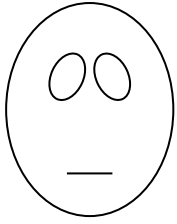   | 1 |
| A LITTLE BIT OF CHALLENGE |    | 2 |
| SOME CHALLENGE            |   | 3 |
| MUCH CHALLENGE            |  | 4 |
| CAN NOT DO                |  | 5 |

ADAPTED FROM: DARTHMOUTH COOP FUNCTIONAL ASSESSMENT CHARTS / WONCO (World Organization of Family Doctors) 1995

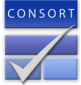

# CONSORT 2010 checklist of information to include when reporting a randomised trial\*

| Section/Topic                    | Item No | Checklist item                                                                                                                                                                              | Reported on page No |
|----------------------------------|---------|---------------------------------------------------------------------------------------------------------------------------------------------------------------------------------------------|---------------------|
| <b>Title and abstract</b>        |         |                                                                                                                                                                                             |                     |
|                                  | 1a      | Identification as a randomised trial in the title                                                                                                                                           | _____               |
|                                  | 1b      | Structured summary of trial design, methods, results, and conclusions (for specific guidance see CONSORT for abstracts)                                                                     | _____               |
| <b>Introduction</b>              |         |                                                                                                                                                                                             |                     |
| Background and objectives        | 2a      | Scientific background and explanation of rationale                                                                                                                                          | _____               |
|                                  | 2b      | Specific objectives or hypotheses                                                                                                                                                           | _____               |
| <b>Methods</b>                   |         |                                                                                                                                                                                             |                     |
| Trial design                     | 3a      | Description of trial design (such as parallel, factorial) including allocation ratio                                                                                                        | _____               |
|                                  | 3b      | Important changes to methods after trial commencement (such as eligibility criteria), with reasons                                                                                          | _____               |
| Participants                     | 4a      | Eligibility criteria for participants                                                                                                                                                       | _____               |
|                                  | 4b      | Settings and locations where the data were collected                                                                                                                                        | _____               |
| Interventions                    | 5       | The interventions for each group with sufficient details to allow replication, including how and when they were actually administered                                                       | _____               |
| Outcomes                         | 6a      | Completely defined pre-specified primary and secondary outcome measures, including how and when they were assessed                                                                          | _____               |
|                                  | 6b      | Any changes to trial outcomes after the trial commenced, with reasons                                                                                                                       | _____               |
| Sample size                      | 7a      | How sample size was determined                                                                                                                                                              | _____               |
|                                  | 7b      | When applicable, explanation of any interim analyses and stopping guidelines                                                                                                                | _____               |
| <b>Randomisation:</b>            |         |                                                                                                                                                                                             |                     |
| Sequence generation              | 8a      | Method used to generate the random allocation sequence                                                                                                                                      | _____               |
|                                  | 8b      | Type of randomisation; details of any restriction (such as blocking and block size)                                                                                                         | _____               |
| Allocation concealment mechanism | 9       | Mechanism used to implement the random allocation sequence (such as sequentially numbered containers), describing any steps taken to conceal the sequence until interventions were assigned | _____               |
| Implementation                   | 10      | Who generated the random allocation sequence, who enrolled participants, and who assigned participants to interventions                                                                     | _____               |
| Blinding                         | 11a     | If done, who was blinded after assignment to interventions (for example, participants, care providers, those                                                                                | _____               |

|                                                      |     |                                                                                                                                                   |       |
|------------------------------------------------------|-----|---------------------------------------------------------------------------------------------------------------------------------------------------|-------|
|                                                      |     | assessing outcomes) and how                                                                                                                       | _____ |
|                                                      | 11b | If relevant, description of the similarity of interventions                                                                                       | _____ |
| Statistical methods                                  | 12a | Statistical methods used to compare groups for primary and secondary outcomes                                                                     | _____ |
|                                                      | 12b | Methods for additional analyses, such as subgroup analyses and adjusted analyses                                                                  | _____ |
| <b>Results</b>                                       |     |                                                                                                                                                   |       |
| Participant flow (a diagram is strongly recommended) | 13a | For each group, the numbers of participants who were randomly assigned, received intended treatment, and were analysed for the primary outcome    | _____ |
|                                                      | 13b | For each group, losses and exclusions after randomisation, together with reasons                                                                  | _____ |
| Recruitment                                          | 14a | Dates defining the periods of recruitment and follow-up                                                                                           | _____ |
|                                                      | 14b | Why the trial ended or was stopped                                                                                                                | _____ |
| Baseline data                                        | 15  | A table showing baseline demographic and clinical characteristics for each group                                                                  | _____ |
| Numbers analysed                                     | 16  | For each group, number of participants (denominator) included in each analysis and whether the analysis was by original assigned groups           | _____ |
| Outcomes and estimation                              | 17a | For each primary and secondary outcome, results for each group, and the estimated effect size and its precision (such as 95% confidence interval) | _____ |
|                                                      | 17b | For binary outcomes, presentation of both absolute and relative effect sizes is recommended                                                       | _____ |
| Ancillary analyses                                   | 18  | Results of any other analyses performed, including subgroup analyses and adjusted analyses, distinguishing pre-specified from exploratory         | _____ |
| Harms                                                | 19  | All important harms or unintended effects in each group (for specific guidance see CONSORT for harms)                                             | _____ |
| <b>Discussion</b>                                    |     |                                                                                                                                                   |       |
| Limitations                                          | 20  | Trial limitations, addressing sources of potential bias, imprecision, and, if relevant, multiplicity of analyses                                  | _____ |
| Generalisability                                     | 21  | Generalisability (external validity, applicability) of the trial findings                                                                         | _____ |
| Interpretation                                       | 22  | Interpretation consistent with results, balancing benefits and harms, and considering other relevant evidence                                     | _____ |
| <b>Other information</b>                             |     |                                                                                                                                                   |       |
| Registration                                         | 23  | Registration number and name of trial registry                                                                                                    | _____ |
| Protocol                                             | 24  | Where the full trial protocol can be accessed, if available                                                                                       | _____ |
| Funding                                              | 25  | Sources of funding and other support (such as supply of drugs), role of funders                                                                   | _____ |

\*We strongly recommend reading this statement in conjunction with the CONSORT 2010 Explanation and Elaboration for important clarifications on all the items. If relevant, we also recommend reading CONSORT extensions for cluster randomised trials, non-inferiority and equivalence trials, non-pharmacological treatments, herbal interventions, and pragmatic trials. Additional extensions are forthcoming: for those and for up to date references relevant to this checklist, see [www.consort-statement.org](http://www.consort-statement.org).

## The TIDieR (Template for Intervention Description and Replication) Checklist\*:

Information to include when describing an intervention and the location of the information

| Item number | Item                                                                                                                                                                                                                                                                                                                | Where located **                        |                   |
|-------------|---------------------------------------------------------------------------------------------------------------------------------------------------------------------------------------------------------------------------------------------------------------------------------------------------------------------|-----------------------------------------|-------------------|
|             |                                                                                                                                                                                                                                                                                                                     | Primary paper (page or appendix number) | Other † (details) |
| 1.          | <b>BRIEF NAME</b><br>Provide the name or a phrase that describes the intervention.                                                                                                                                                                                                                                  | _____                                   | _____             |
| 2.          | <b>WHY</b><br>Describe any rationale, theory, or goal of the elements essential to the intervention.                                                                                                                                                                                                                | _____                                   | _____             |
| 3.          | <b>WHAT</b><br>Materials: Describe any physical or informational materials used in the intervention, including those provided to participants or used in intervention delivery or in training of intervention providers.<br>Provide information on where the materials can be accessed (e.g. online appendix, URL). | _____                                   | _____             |
| 4.          | Procedures: Describe each of the procedures, activities, and/or processes used in the intervention, including any enabling or support activities.                                                                                                                                                                   | _____                                   | _____             |
| 5.          | <b>WHO PROVIDED</b><br>For each category of intervention provider (e.g. psychologist, nursing assistant), describe their expertise, background and any specific training given.                                                                                                                                     | ∞<br>_____                              | _____             |
| 6.          | <b>HOW</b><br>Describe the modes of delivery (e.g. face-to-face or by some other mechanism, such as internet or telephone) of the intervention and whether it was provided individually or in a group.                                                                                                              | ∞<br>_____                              | _____             |
| 7.          | <b>WHERE</b><br>Describe the type(s) of location(s) where the intervention occurred, including any necessary infrastructure or relevant features.                                                                                                                                                                   | ∞<br>_____                              | _____             |

|    |                          |                                                                                                    |       |
|----|--------------------------|----------------------------------------------------------------------------------------------------|-------|
| 1  | <b>WHEN and HOW MUCH</b> |                                                                                                    |       |
| 2  |                          |                                                                                                    |       |
| 3  | <b>8.</b>                | Describe the number of times the intervention was delivered and over what period of time including | _____ |
| 4  |                          | the number of sessions, their schedule, and their duration, intensity or dose.                     | _____ |
| 5  |                          |                                                                                                    |       |
| 6  |                          | <b>TAILORING</b>                                                                                   |       |
| 7  |                          |                                                                                                    |       |
| 8  | <b>9.</b>                | If the intervention was planned to be personalised, titrated or adapted, then describe what, why,  | _____ |
| 9  |                          | when, and how.                                                                                     | _____ |
| 10 |                          |                                                                                                    |       |
| 11 |                          | <b>MODIFICATIONS</b>                                                                               |       |
| 12 |                          |                                                                                                    |       |
| 13 | <b>10.*</b>              | If the intervention was modified during the course of the study, describe the changes (what, why,  | n/a   |
| 14 |                          | when, and how).                                                                                    | _____ |
| 15 |                          |                                                                                                    |       |
| 16 |                          | <b>HOW WELL</b>                                                                                    |       |
| 17 |                          |                                                                                                    |       |
| 18 | <b>11.</b>               | Planned: If intervention adherence or fidelity was assessed, describe how and by whom, and if any  | 8, 13 |
| 19 |                          | strategies were used to maintain or improve fidelity, describe them.                               | _____ |
| 20 |                          |                                                                                                    |       |
| 21 | <b>12.*</b>              | Actual: If intervention adherence or fidelity was assessed, describe the extent to which the       | 13    |
| 22 |                          | intervention was delivered as planned.                                                             | _____ |
| 23 |                          |                                                                                                    |       |
| 24 |                          |                                                                                                    |       |

\*\* **Authors** - use N/A if an item is not applicable for the intervention being described. **Reviewers** – use ‘?’ if information about the element is not reported/not sufficiently reported.

† If the information is not provided in the primary paper, give details of where this information is available. This may include locations such as a published protocol or other published papers (provide citation details) or a website (provide the URL).

‡ If completing the TIDieR checklist for a protocol, these items are not relevant to the protocol and cannot be described until the study is complete.

\* We strongly recommend using this checklist in conjunction with the TIDieR guide (see *BMJ* 2014;348:g1687) which contains an explanation and elaboration for each item.

\* The focus of TIDieR is on reporting details of the intervention elements (and where relevant, comparison elements) of a study. Other elements and methodological features of studies are covered by other reporting statements and checklists and have not been duplicated as part of the TIDieR checklist. When a **randomised trial** is being reported, the TIDieR checklist should be used in conjunction with the CONSORT statement (see [www.consort-statement.org](http://www.consort-statement.org)) as an extension of **Item 5 of the CONSORT 2010 Statement**. When a **clinical trial protocol** is being reported, the TIDieR checklist should be used in conjunction with the SPIRIT statement as an extension of **Item 11 of the SPIRIT 2013 Statement** (see [www.spirit-statement.org](http://www.spirit-statement.org)). For alternate study designs, TIDieR can be used in conjunction with the appropriate checklist for that study design (see [www.equator-network.org](http://www.equator-network.org)).



# BMJ Open

## Does perturbation-based balance training prevent falls among individuals with chronic stroke? A randomized controlled trial.

|                                 |                                                                                                                                                                                                                                                                                                                                                                                                                                                                                                                                     |
|---------------------------------|-------------------------------------------------------------------------------------------------------------------------------------------------------------------------------------------------------------------------------------------------------------------------------------------------------------------------------------------------------------------------------------------------------------------------------------------------------------------------------------------------------------------------------------|
| Journal:                        | <i>BMJ Open</i>                                                                                                                                                                                                                                                                                                                                                                                                                                                                                                                     |
| Manuscript ID                   | bmjopen-2018-021510.R1                                                                                                                                                                                                                                                                                                                                                                                                                                                                                                              |
| Article Type:                   | Research                                                                                                                                                                                                                                                                                                                                                                                                                                                                                                                            |
| Date Submitted by the Author:   | 06-Jun-2018                                                                                                                                                                                                                                                                                                                                                                                                                                                                                                                         |
| Complete List of Authors:       | Mansfield, Avril; Toronto Rehabilitation Institute, Aqui, Anthony; Toronto Rehabilitation Institute Danells, Cynthia; Toronto Rehabilitation Institute Knorr, Svetlana; Toronto Rehabilitation Institute Centen, Andrew; Sunnybrook Research Institute DePaul, Vincent; Queen's University Schinkel-Ivy, Alison; Nipissing University Brooks, Dina; University of Toronto, Physical Therapy Inness, Elizabeth; Toronto Rehabilitation Institute, Balance Mobility and Falls Clinic Mochizuki, George; Sunnybrook Research Institute |
| <b>Primary Subject Heading</b>: | Rehabilitation medicine                                                                                                                                                                                                                                                                                                                                                                                                                                                                                                             |
| Secondary Subject Heading:      | Sports and exercise medicine, Cardiovascular medicine, Geriatric medicine, Neurology                                                                                                                                                                                                                                                                                                                                                                                                                                                |
| Keywords:                       | Stroke < NEUROLOGY, REHABILITATION MEDICINE, Exercise, Physiotherapy, Accidental falls, Postural balance                                                                                                                                                                                                                                                                                                                                                                                                                            |
|                                 |                                                                                                                                                                                                                                                                                                                                                                                                                                                                                                                                     |

SCHOLARONE™  
Manuscripts

1  
2 1 **Title:** Does perturbation-based balance training prevent falls among individuals with chronic stroke? A  
3  
4 2 randomized controlled trial.

5  
6 3 **Authors:** Avril Mansfield, PhD;<sup>1,3</sup> Anthony AQUI, MSc;<sup>1</sup> Cynthia J Danells, MSc;<sup>1,3</sup> Svetlana Knorr,  
7  
8 4 PhD;<sup>1</sup> Andrew Centen, MSc;<sup>2</sup> Vincent G DePaul, PhD;<sup>4</sup> Alison Schinkel-Ivy, PhD;<sup>5</sup> Dina Brooks,  
9  
10 5 PhD;<sup>1,3</sup> Elizabeth L Inness, PhD;<sup>1,3</sup> George Mochizuki, PhD<sup>1-3</sup>

11  
12  
13 6 **Affiliations:** <sup>1</sup>Toronto Rehabilitation Institute, Toronto, ON, Canada; <sup>2</sup>Evaluative Clinical Sciences,  
14  
15 7 Hurvitz Brain Sciences Research Program, Sunnybrook Research Institute, Toronto, ON, Canada;  
16  
17 8 <sup>3</sup>Department of Physical Therapy, University of Toronto, Toronto, ON, Canada; <sup>4</sup>School of  
18  
19 9 Rehabilitation Therapy, Queen's University, Kingston, ON, Canada; <sup>5</sup>Schulich School of Education –  
20  
21 10 School of Physical and Health Education, Nipissing University, North Bay, ON, Canada

22  
23  
24  
25 11 **Corresponding author:** Avril Mansfield; address: 550 University Ave, Toronto, ON, M5G 2A2; tel:  
26  
27 12 416-597-3422 ext 7831; e-mail: [avril.mansfield@uhn.ca](mailto:avril.mansfield@uhn.ca)

28  
29 13 **Word count:** 4,365

30  
31  
32 14 **Funding:** This study was supported by the Canadian Institutes of Health Research (MOP 133577). The  
33  
34 15 authors also acknowledge the support of the Toronto Rehabilitation Institute; equipment and space  
35  
36 16 have been funded with grants from the Canada Foundation for Innovation, Ontario Innovation Trust,  
37  
38 17 and the Ministry of Research and Innovation. AM holds a New Investigator Award from the Canadian  
39  
40 18 Institutes of Health Research (MSH 141983). DB holds a Canada Research Chair. These funding  
41  
42 19 sources had no role in the design of this study and will not have any role during its execution, analyses,  
43  
44 20 interpretation of the data, or decision to submit results.

45  
46  
47  
48 21 **Acknowledgements:** We thank the members of the Data Safety and Monitoring Committee (Kathryn  
49  
50 22 Sibley, Susan Marzolini, Parvin Eftekhari and Irene Antunes) who monitored the trial. We also  
51  
52 23 acknowledge Rabea Aryan and Ellen Cohen for assistance with administering the intervention, Jyoti  
53  
54  
55  
56  
57  
58  
59  
60

1  
2 24 Mann and Andrew Huntley for assistance with data processing, and Cynthia Campos for assistance  
3  
4 25 with creating the training manual.  
5  
6  
7  
8  
9  
10  
11  
12  
13  
14  
15  
16  
17  
18  
19  
20  
21  
22  
23  
24  
25  
26  
27  
28  
29  
30  
31  
32  
33  
34  
35  
36  
37  
38  
39  
40  
41  
42  
43  
44  
45  
46  
47  
48  
49  
50  
51  
52  
53  
54  
55  
56  
57  
58  
59  
60

For peer review only

1  
2 26 **ABSTRACT** (word count: 300; max: 300)  
3

4 27 **Objectives:** No intervention has been shown to prevent falls post-stroke. We aimed to determine if  
5  
6 28 perturbation-based balance training (PBT) can reduce falls in daily life among individuals with chronic  
7  
8 29 stroke.  
9

10  
11 30 **Design:** Assessor-blinded randomized controlled trial.  
12

13 31 **Setting:** Two academic hospitals in an urban area.  
14

15 32 **Interventions:** Participants were allocated using stratified blocked randomization to either 'traditional'  
16  
17 33 balance training (control) or PBT. PBT focused on improving responses to instability, whereas  
18  
19 34 traditional balance training focused on maintaining stability during functional tasks. Training sessions  
20  
21 35 were 1 hour twice/week for 6 weeks. Participants were also invited to complete 2 'booster' training  
22  
23 36 sessions during the follow-up.  
24  
25

26  
27 37 **Participants:** Eighty-eight participants with chronic stroke (>6-months post-stroke) were recruited and  
28  
29 38 randomly allocated one of the two interventions. Five participants withdrew; 42 (control) and 41 (PBT  
30  
31 39 group) were included in the analysis.  
32  
33

34 40 **Primary and secondary outcome measures:** The primary outcome was rate of falls in the 12-months  
35  
36 41 post-training. Negative binomial regression was used to compare fall rates between groups. Secondary  
37  
38 42 outcomes were measures of balance, mobility, balance confidence, physical activity, and social  
39  
40 43 integration.  
41  
42

43 44 **Results:** PBT participants reported 53 falls (1.45 falls/person-year) and control participants reported 64  
44  
45 45 falls (1.72 falls/person-year; rate ratio: 0.85 [0.42, 1.69]; p=0.63). Per-protocol analysis included 32  
46  
47 46 PBT and 34 control participants who completed at least 10/12 initial training sessions and 1 booster  
48  
49 47 session. Within this sub-set, PBT participants reported 32 falls (1.07 falls/person-year) and control  
50  
51 48 participants reported 57 falls (1.75 falls/person-year; rate ratio: 0.62 [0.29, 1.30]; p=0.20). PBT  
52  
53 49 participants had greater improvement in reactive balance control than the control group, and these  
54  
55  
56  
57  
58  
59  
60

1  
2 50 improvements were sustained 12-months post-training. There were no intervention-related serious  
3  
4 51 adverse effects.  
5

6 52 **Conclusions:** The results are inconclusive. PBT may help to prevent falls in daily life post-stroke, but  
7  
8  
9 53 ongoing training may be required to maintain the benefits.  
10

11 54 **Trial registration:** ISRCTN05434601.  
12

13 55 **Funding:** Canadian Institutes of Health Research.  
14

15  
16 56 **Key words:** Stroke; Rehabilitation; Exercise; Physiotherapy; Accidental Falls; Postural balance  
17  
18  
19  
20  
21  
22  
23  
24  
25  
26  
27  
28  
29  
30  
31  
32  
33  
34  
35  
36  
37  
38  
39  
40  
41  
42  
43  
44  
45  
46  
47  
48  
49  
50  
51  
52  
53  
54  
55  
56  
57  
58  
59  
60

## STRENGTHS AND LIMITATIONS OF THE STUDY

- This study employed an assessor-blinded randomized controlled trial. As is typical of exercise studies, participant blinding was not possible.
- Attendance to the intervention was high (mean 87% of sessions attended), and rates of withdrawal from the study were low (<6%).
- The primary outcome (falls in daily life) was collected via self-report, which may have led to under-reporting.
- Inclusion and exclusion criteria were minimal so that results would be generalizable to a broad population of individuals with chronic stroke. However, recruited participants were, on average, high functioning; these results might not apply to more severely-affected individuals with stroke.

## INTRODUCTION

People with stroke have increased fall risk compared to age-matched individuals who have not had a stroke.<sup>1</sup> Impaired balance control, low balance confidence, and high rate of falls post-stroke are associated with reduced quality of life and reduced physical activity as a strategy to prevent falls.<sup>2,3</sup> Physical exercise, particularly exercise that includes balance training, can reduce fall rates in older adults.<sup>4</sup> However, studies including individuals with stroke have not demonstrated reduced fall rates following balance training.<sup>5,6</sup>

Balance training programs typically include exercises that aim to improve the ability to maintain balance when keeping still (e.g., standing with reduced base of support) or during voluntary movement (e.g., sit-to-stand or step ups).<sup>7-11</sup> This type of balance training may prevent falls by reducing the risk of losing balance in daily life. However, occasional loss of balance may be an inevitable consequence of mobility, so the ability to react quickly after losing balance (i.e., reactive balance control) is essential to prevent falls.<sup>12</sup> Perturbation-based balance training (PBT) is a type of exercise where participants repeatedly experience loss of balance in order to practice and improve control of balance reactions.<sup>13</sup> A review of small-sample randomized controlled trials suggests that PBT can prevent falls in older adults and individuals with Parkinson's disease.<sup>14</sup>

People with stroke have impaired reactive balance control,<sup>15,16</sup> and impaired control of balance reactions is related to increased fall rates in daily life post-stroke.<sup>17,18</sup> PBT can improve reactive balance control post-stroke.<sup>19</sup> A non-randomized study found that those who completed PBT during in-patient stroke rehabilitation fell less frequently post-discharge than those who did not.<sup>20</sup>

The main purpose of this study was to determine if PBT reduces fall rates in people with chronic stroke. A secondary purpose was to determine the effect of PBT on balance control, balance confidence, mobility, daily physical activity, and social integration. We hypothesized that, compared to a control group who completed 'traditional' balance training, those who completed PBT would

1  
2 93 experience fewer falls in the year post-training and would have greater improvements in measures of  
3  
4 94 functional balance and mobility. Additionally, we expected that, due to reduced fall rates and improved  
5  
6 95 balance confidence, participants who completed PBT would be less likely to restrict daily physical  
7  
8  
9 96 activities; therefore, we hypothesized that participants who completed PBT would show increased daily  
10  
11 97 physical activity and improved social integration compared to those in the control group.  
12

## 13 98

## 15 99 **METHODS**

### 17 18 100 **Trial design**

19  
20 101 This assessor-blinded pragmatic randomized controlled trial took place at the Toronto Rehabilitation  
21  
22 102 Institute (University Health Network) and Sunnybrook Health Sciences Centre. Individuals with  
23  
24  
25 103 chronic stroke were recruited and randomly assigned to either: 1) PBT or 2) 'traditional' balance  
26  
27 104 training (control group). The full study protocol is available elsewhere,<sup>21</sup> protocol modifications are  
28  
29 105 detailed in the relevant sections below. The protocol and amendments were approved by the University  
30  
31 106 Health Network (study ID: 14-7428) and Sunnybrook Health Sciences Centre (study ID: 134-2014)  
32  
33  
34 107 Research Ethics Boards. This manuscript was prepared following the CONSORT<sup>22</sup> and TIDieR<sup>23</sup>  
35  
36 108 checklists.  
37  
38  
39 109

### 40 41 110 **Participants**

42  
43 111 Community-dwelling adults with chronic stroke (>6 months post-stroke) were recruited from research  
44  
45 112 volunteer databases and advertisements in the community. Participants could stand independently  
46  
47  
48 113 without upper-limb support for >30s and tolerate at least 10 postural perturbations. Exclusion criteria  
49  
50 114 were: >2.1m tall and/or weighing >150kg; other neurological conditions; lower extremity amputation;  
51  
52 115 unable to understand instructions in English; recent (last 6 months) significant illness, injury or  
53  
54  
55 116 surgery; severe osteoporosis (diagnosis of osteoporosis with fracture); poorly controlled diabetes or  
56  
57  
58  
59  
60



1  
2 117 hypertension; contraindications to physical exercise,<sup>24</sup> receiving physiotherapy or supervised exercise  
3  
4 118 targeting balance and mobility between the time of recruiting and the post-training assessment; and/or  
5  
6 119 received PBT in the year before enrolment. Due to difficulty recruiting, the protocol was amended to  
7  
8  
9 120 allow individuals <50 years old to participate. Volunteers completed telephone screening and  
10  
11 121 subsequently attended an initial assessment where written informed consent was obtained and  
12  
13 122 eligibility was confirmed. To help alleviate barriers to participation, participants were compensated for  
14  
15  
16 123 travel expenses (public transit fare or parking).  
17  
18 124

## 20 125 **Interventions**

21  
22  
23 126 Participants completed 2 1-hour training sessions per week for 6 weeks, and 2 1-hour ‘booster’ training  
24  
25 127 sessions 3- and 9-months after the initial training period. Interventions were administered by a  
26  
27 128 physiotherapist (CJD or SK) on a 1:1 basis (i.e., one physiotherapist per participant) in research  
28  
29 129 laboratories in academic hospitals. Both laboratories contained a 2.63 x 2.63m 4-post XY patient lift  
30  
31  
32 130 gantry (Prism Medical Ltd, Concord, ON, Canada), and the Sunnybrook laboratory also contained a  
33  
34 131 8.5m long ceiling lift track, to which the safety harness was attached during PBT. Physiotherapists  
35  
36  
37 132 were trained in delivering the control intervention by reviewing the intervention developers’  
38  
39 133 documentation,<sup>25</sup> and in delivering the PBT intervention by study investigators (AM and VGD).  
40  
41 134 Interventions followed a general guide, but were tailored to participants’ ability and balance  
42  
43 135 impairments. Participants rated perceived level of challenge on a 5-point scale (see Supplementary  
44  
45  
46 136 Material) after completing each exercise set. The physiotherapists documented activities in each  
47  
48 137 session, perceived level of challenge, adverse events, and deviations from prescribed activities.  
49

## 50 138

### 52 139 *Control group*

53  
54  
55  
56  
57  
58  
59  
60

1  
2 140 The control group completed the Keep Moving with Stroke program.<sup>25</sup> This is an exercise program for  
3  
4 141 community-dwelling individuals with stroke, based on balance and mobility interventions evaluated in  
5  
6 142 clinical trials.<sup>9-11</sup> This program was designed to be delivered in a group, but was delivered 1:1 in this  
7  
8  
9 143 study to match attention received from the physiotherapist by the PBT group. Each session included a  
10  
11 144 5-10 minute warm-up, 40 minutes of mobility and balance exercises, and a 5-10 minute cool-down  
12  
13 145 with stretching. Exercises included walking, sit-to-stand, heel raises, walking while carrying an object,  
14  
15 146 tap-ups or step-ups (forward and sideways), reaching and weight shifting, and standing with reduced  
16  
17  
18 147 base of support.  
19

#### 20 148 21 22 23 149 *PBT group*

24  
25 150 PBT sessions included a 5-10 minute warm-up, voluntary tasks intended to induce internal  
26  
27 151 perturbations, voluntary tasks combined with external perturbations, and a 5-10 minute cool-down.  
28  
29 152 Participants were supervised by the physiotherapist and wore a custom safety harness (ABG Concept  
30  
31  
32 153 Médical Inc., Valcourt, QC, Canada) attached to the overhead support. Internal perturbations occurred  
33  
34 154 when participants failed to control balance during voluntary movement; ‘agility’ tasks, such as kicking  
35  
36 155 a soccer ball, were used to induce internal perturbations. External perturbations were caused by forces  
37  
38  
39 156 outside participants’ control (e.g., push or pull from the physiotherapist). We aimed for at least 60  
40  
41 157 postural perturbations per session, and set the task difficulty such that participants required an upper  
42  
43 158 extremity response, external assistance (i.e., from the overhead harness or physiotherapist), or a multi-  
44  
45 159 step response ~50% of the time. The progression in voluntary tasks occurred on a continuum from  
46  
47  
48 160 stable to mobile, and from predictable to unpredictable.<sup>26</sup> Additionally, progression occurred by  
49  
50 161 increasing the magnitude of external perturbation, or imposing sensory or environmental challenges.  
51  
52  
53 162 The full PBT program is available in the Supplementary Material.  
54  
55 163

## Group allocation

Participants were assigned using blocked stratified randomization with allocation concealment to either the control or PBT group by the principal investigator (AM), who was not involved in recruiting, assessments, or intervention administration. A variable block size of 4, 6 or 8 was used. There were four strata from two stratification factors: site (two levels), and frequency of ‘failures’ during baseline reactive balance control assessment<sup>17</sup> (two levels). The random allocation sequence was computer generated and maintained in an electronic file by the principal investigator.

## Outcomes

### *Cohort descriptors*

Demographic and stroke information were recorded at study enrolment: age, sex, time since stroke, lesion location, falls history, National Institutes of Health Stroke Scale (NIH-SS<sup>27</sup>), and Chedoke-McMaster Stroke Assessment (CMSA) foot and leg scores.<sup>28</sup> Demographics and medical history were obtained by self-report and, when possible, verified from participants’ hospital charts.

### *Primary outcome – falls*

A fall was defined as “an event that results in a person coming to rest unintentionally on the ground or other lower level”.<sup>29</sup> Participants completed 12-months of falls reporting after the initial 6-week training period. Participants were provided stamped addressed postcards containing a 2-week calendar to record falls, which they completed daily, and returned to the research team fortnightly. If a postcard was not returned within 2 weeks the research assistant called the participant to ascertain if they fell. Participants who fell completed a short telephone questionnaire regarding the cause, circumstances, and consequences of the fall. Falls were excluded from analysis, by unanimous decision of two blinded research assistants, if they were caused by loss of consciousness or an overwhelming external force

1  
2 188 (i.e., if anyone would fall in that situation). If the research assistants could not agree that a fall should  
3  
4 189 be excluded, that fall was included in the analysis.  
5

6 190

### 9 191 *Secondary outcomes*

10  
11 192 Balance and mobility and balance confidence were assessed immediately before, immediately after,  
12  
13 193 and 6- and 12-months after the end of the initial training period. Functional balance and mobility were  
14  
15 194 assessed using the Berg balance scale (BBS<sup>30</sup>), the mini-Balance Evaluation Systems test (mini-  
16  
17 195 BEST<sup>31</sup>), and the Timed Up & Go (TUG<sup>32</sup>). The sub-scales of the mini-BEST were used to assess  
18  
19 196 different components of balance control (anticipatory balance control, reactive balance control, sensory  
20  
21 197 orientation, and gait). The Activities-specific Balance Confidence (ABC) questionnaire<sup>33</sup> was used to  
22  
23 198 assess balance confidence in daily activities.  
24  
25

26  
27 199 Physical activity and social integration were evaluated with the Physical Activity Scale for  
28  
29 200 Individuals with Physical Disabilities (PASIPD<sup>34</sup>) and the Subjective Index of Physical and Social  
30  
31 201 Outcome (SIPSO<sup>35</sup>), respectively, at baseline and every 2 months during the 12-month follow-up.  
32  
33

### 34 202

### 36 203 **Blinding**

37  
38 204 The research assistants (AA and AC) were blinded to group allocation and were responsible for  
39  
40 205 screening, recruiting, and collecting data. At the post-training, 6-month, and 12-month assessments, the  
41  
42 206 research assistants guessed group allocation for each participant, rated their confidence in their guess of  
43  
44 207 group allocation, and noted if they had received any information to violate blinding. In cases where  
45  
46 208 blinding was violated, the balance measures were re-coded from video footage by another blinded  
47  
48 209 research assistant.  
49  
50

### 51 210

### 55 211 **Sample size**

1  
2 212 The target sample size was estimated for the primary outcome (fall rate in the year post-training) using  
3  
4 213 a formula for negative binomial regression.<sup>36</sup> Assuming the control group would report 1.75 per  
5  
6 214 person-year,<sup>17</sup> a rate ratio of 0.54,<sup>14</sup> mean follow-up time of 11 months per person, level of significance  
7  
8  
9 215 of 0.05, and power of 0.8, we estimated that 37 participants per group would be required to show a  
10  
11 216 statistically significant between-group difference in fall rates.  
12

### 13 217 14 15 16 218 **Statistical analysis**

17  
18 219 Wilcoxon-Mann-Whitney test (continuous/ordinal variables) and Fisher's exact test  
19  
20 220 (categorical/frequency variables) were used to compare the two groups at baseline. Negative binomial  
21  
22 221 regression was used to compare fall rates and logistic regression was used to compare the proportion of  
23  
24  
25 222 fallers between the two groups. Intent-to-treat analysis was used; that is, all participants with some  
26  
27 223 falls-monitoring data were included in the analyses. To account for variable falls-monitoring duration  
28  
29  
30 224 between participants (e.g., due to premature withdrawal from the study) the natural log of the  
31  
32 225 monitoring duration was included as an offset variable in negative binomial regression, and as a  
33  
34 226 covariate in logistic regression. Exploratory per-protocol analysis was also conducted, comparing  
35  
36 227 proportion of fallers and fall rates between the two groups, including only those participants who  
37  
38  
39 228 attended at least 10/12 of the initial training sessions and 1 booster session. We initially planned to  
40  
41 229 conduct repeated-measures analysis of variance, with group-by-time interaction, to evaluate the effect  
42  
43 230 of the interventions on secondary outcome measures.<sup>21</sup> However, because the variables were not  
44  
45  
46 231 normally distributed we conducted analysis of co-variance (ANCOVA), comparing BBS, mini-BEST,  
47  
48 232 mini-BEST subscale scores, TUG, ABC, PASIPD, and SIPSO at each time point between groups,  
49  
50 233 controlling for the value at baseline. Dependent variables were rank transformed prior to entry into the  
51  
52 234 ANCOVA to allow for non-parametric analysis.<sup>37</sup> Alpha was 0.05 for all analyses.  
53  
54  
55 235

1

## 2 236 **Patient and public involvement**

3

4 237 Patients or the general public were not involved in the design of this study, development of research

5

6 238 questions, or outcome measures. Some participants were recruited via referral from other participants.

7

8 239 Participants received a letter of appreciation at the end of the study, which included a summary of the

9

10 240 results. At the end of their involvement with the study, participants were invited to complete a short

11

12 241 questionnaire about their experiences, including whether they found data collection and the

13

14 242 intervention difficult.

15

16 243

17

## 18 244 **RESULTS**

19

### 20 245 **Recruitment**

21

22 246 Recruiting occurred between 24 April 2014 and 29 June 2016. Initially, we planned to recruit 46

23

24 247 participants per group to account for a 20% withdrawal rate.<sup>21</sup> However, recruiting was stopped when

25

26 248 we had at least 37 participants per group who had returned at least one fall-reporting postcard. Any

27

28 249 participants who had started the intervention at this point continued with the study until they either

29

30 250 withdrew or completed all study elements. The trial ended when data collection for all recruited

31

32 251 participants was complete (August 2017). Forty-four participants were assigned to each group, with 42

33

34 252 (control) and 41 (PBT) returning at least 1 fall-reporting postcard (Figure 1); thus 42 control and 41

35

36 253 PBT participants were included in analysis of the primary outcome (falls in daily life). Baseline

37

38 254 characteristics for these participants are in Table 1; there were no significant differences between

39

40 255 groups on any baseline characteristics.

41

42 256

43

### 44 257 **Intervention adherence**

45

46 258 During the initial 6-week training program, PBT participants attended a mean 10.5 sessions, with 34/41

47

48 259 participants attending at least 10 sessions (out of the prescribed 12). Participants experienced a mean of

49

50

51

52

53

54

55

1  
2 260 577 perturbations during all sessions (standard deviation: 195 perturbations; minimum: 42  
3  
4 261 perturbations), or a mean of 55 perturbations per session (standard deviation: 9 perturbations). For all  
5  
6 262 PBT sessions combined, mean rate of balance recovery ‘failures’ was 57%, and mean rate of perceived  
7  
8 263 challenge was 2.4 (on a five-point scale). In the initial 6-week training phase, control participants  
9  
10 264 attended a mean of 11 sessions, with 38/42 participants attending at least 10 sessions (out of the  
11  
12 265 prescribed 12). On average, control participants completed 87% of the prescribed exercises (standard  
13  
14 266 deviation: 18%). For all control training sessions combined, mean rate of perceived challenge was 2.4.  
15  
16  
17  
18 267

## 20 268 **Outcomes and estimation**

### 22 269 *Blinding*

24  
25 270 Blinding was violated for 9 participants (7 PBT and 2 control), who revealed their group allocation in  
26  
27 271 conversation with the research assistant. The BBS and mini-BEST scores for these participants were re-  
28  
29 272 coded from video recordings by another blinded research assistant who had no interaction with  
30  
31 273 participants. For the remaining participants, the research assistants correctly guessed group allocation  
32  
33 274 56% of the time; i.e., guesses were not correct more often than would be expected by random chance.  
34  
35 275

### 38 276 *Missing data*

40  
41 277 Data were missing at assessment time points because participants: declined to complete the assessment  
42  
43 278 (15 PBT and 21 control assessments); were unavailable due to acute illness (3 control assessments);  
44  
45 279 were unavailable due vacation or other personal commitments (3 control assessments); or could not be  
46  
47 280 contacted at the time of the assessment (6 control assessments). Some participants declined to come to  
48  
49 281 the laboratories for the 6- and 12-month assessments, but were willing to complete the questionnaires  
50  
51 282 (ABC, SIPSO, and PASIPD) over the telephone. Even when participants attended a study appointment,  
52  
53  
54  
55  
56  
57  
58  
59

1  
2 283 some declined to complete individual tests; the number of individuals included in analysis of each  
3  
4 284 variable at each time point is detailed in the Tables.

5  
6 285

7  
8  
9 286 *Falls*

10  
11 287 Data on number of individuals reporting 1 or more falls, and fall rates, are presented in Table 2. In  
12  
13 288 intent-to-treat analysis, the between-group differences in odds of being a ‘faller’ (odds ratio: 0.71 [0.30,  
14  
15 289 1.70];  $p=0.44$ ) and fall rates (rate ratio: 0.85 [0.42, 1.69];  $p=0.63$ ) were not statistically significant.  
16  
17  
18 290 Thirty-two PBT participants and 34 control participants completed at least 10/12 of the initial training  
19  
20 291 sessions and 1 booster session, and were included in per-protocol analysis. Within this sub-set, the  
21  
22 292 between group differences in odds of being a ‘faller’ (odds ratio: 0.56 [0.21, 1.50];  $p=0.25$ ) and fall  
23  
24 293 rates (rate ratio: 0.62 [0.29, 1.30];  $p=0.20$ ) were not statistically significant.

25  
26  
27 294

28  
29 295 *Balance confidence, balance, mobility, physical activity, and social integration*

30  
31  
32 296 Post-training, the PBT group had higher scores than the control group for the reactive sub-scale of the  
33  
34 297 mini-BEST ( $F_{1,74}=7.33$ ,  $p=0.0084$ ; Table 3), whereas the control group had higher scores than the PBT  
35  
36 298 group for the sensory subscale ( $F_{1,74}=4.19$ ,  $p=0.044$ ). Scores for the reactive sub-scale of the mini-  
37  
38 299 BEST were higher for the PBT group than the control group at 6-months ( $F_{1,57}=8.32$ ,  $p=0.0055$ ) and  
39  
40 300 12-months ( $F_{1,53}=11.59$ ,  $p=0.0013$ ). Likewise, at 12-months, the PBT group had a higher score on the  
41  
42 301 total mini-BEST than the control group ( $F_{1,53}=4.04$ ,  $p=0.049$ ). There were no other statistically  
43  
44 302 significant between-group differences for balance and mobility measures at any time point.

45  
46  
47  
48 303 There were no significant between-group differences for the PASIPD at any time point (Table  
49  
50 304 4). SIPSO scores were significantly higher for the control group compared to the PBT group at 6-  
51  
52 305 months ( $F_{1,59}=6.73$ ,  $p=0.012$ ), 8-months ( $F_{1,54}=4.25$ ,  $p=0.044$ ), 10-months ( $F_{1,61}=4.89$ ,  $p=0.031$ ), and  
53  
54 306 12-months ( $F_{1,59}=4.13$ ,  $p=0.047$ ).

55  
56  
57  
58  
59  
60



1  
2 307 Data showing change in secondary outcomes over time are presented in the supplementary data  
3  
4 308 (Supplementary Tables S1 and S2). No analyses were conducted on these data.  
5

### 6 309 7 8 9 310 **Ancillary analysis**

10  
11 311 Additional exploratory analysis compared causes, circumstances, and consequences of falls in daily life  
12  
13 312 between groups (Table 5). There was a significant between-group difference in motor activity at the  
14  
15 313 time of the fall ( $p=0.010$ ). Falls in control participants were more likely to occur during transfers than  
16  
17 314 falls in PBT participants, whereas falls in PBT participants were more likely to occur during  
18  
19 315 reaching/bending than falls in control participants. Participants had something in their hands at the time  
20  
21 316 of 45% of control-group falls, compared to 23% of PBT-group falls ( $p=0.023$ ). PBT participants  
22  
23 317 attempted to stop themselves from falling by using a step response for 21%, or a grasping response for  
24  
25 318 18% of falls, whereas control participants tried to prevent the fall by stepping for only 9% of falls, and  
26  
27 319 grasping for 30% of falls; however, this difference was not statistically significant ( $p=0.18$ ). PBT  
28  
29 320 participants required assistance to get up after 48% of falls, compared to just 27% of falls for control  
30  
31 321 participants ( $p=0.040$ ). Injuries resulted from 18 falls (39% of falls) in the PBT group and 20 falls  
32  
33 322 (34% of falls) in the control group ( $p=0.68$ ). Most injuries were minor (e.g., cuts and bruises).  
34  
35 323 Participants sought medical attention after 3 falls (all control): visit to emergency room (2 falls), and  
36  
37 324 treatment from an unspecified healthcare professional (1 fall).  
38  
39  
40  
41  
42

### 43 325 44 45 326 **Harms**

46  
47 327 Forty-eight adverse events were possibly, probably, or definitely related to study procedures or  
48  
49 328 interventions among the 88 randomized participants. Events were: fatigue with training (3 PBT, 1  
50  
51 329 control); joint pain during or soon after training (14 PBT, 11 control); delayed onset muscle soreness (5  
52  
53 330 PBT, 8 control); seizure during training (1 PBT participant, with history of frequent seizures);  
54  
55  
56  
57  
58  
59  
60

1  
2 331 abnormally elevated heart rate and low blood pressure during training (1 control; this participant was  
3  
4 332 withdrawn from the study). For all but this last event, medical attention was not necessary to treat  
5  
6 333 adverse events. In the case of fatigue or joint/muscle pain, the intensity and/or duration of training was  
7  
8  
9 334 reduced until the issue resolved. Additionally, four falls that occurred during the training portion of the  
10  
11 335 study were considered related to study procedures or interventions. In one case (control) the participant  
12  
13 336 fell outside the hospital while on the way to a study appointment. The other three falls were reported by  
14  
15  
16 337 a single PBT participant who noted that he felt more confident, and may have increased risk-taking  
17  
18 338 behaviour, as a result of the intervention. Eight participants experienced serious adverse events  
19  
20 339 unrelated to study procedures, but that resulted in study withdrawal: prolonged hospitalization (1 PBT,  
21  
22 340 1 control); another stroke (2 PBT, 3 control); death (1 control); and cancer diagnosis (1 control).  
23  
24  
25 341

## 27 342 **DISCUSSION**

28  
29 343 We hypothesized that PBT would reduce fall rates among individuals with stroke; this hypothesis was  
30  
31  
32 344 not supported. While the rate ratio comparing falls rates between the PBT and control groups was 0.85,  
33  
34 345 this was not statistically significant. The pooled rate ratio estimating the effect of exercise on fall rates  
35  
36 346 in community-dwelling older adults is 0.80,<sup>4</sup> which is similar to that observed in the current study. Our  
37  
38  
39 347 sample size was based on a rate ratio of 0.54, which was estimated from a meta-analysis of PBT,<sup>14</sup> that  
40  
41 348 included studies among older adults and individuals with Parkinson's disease. Another non-randomized  
42  
43 349 study reported a fall rate ratio of 0.32 when comparing individuals with sub-acute stroke who  
44  
45 350 completed PBT during in-patient rehabilitation to those who did not.<sup>20</sup> The effect of PBT on fall rates  
46  
47  
48 351 in chronic stroke may be much lower than in other patient populations or individuals with sub-acute  
49  
50 352 stroke and, therefore, the current study may not have had sufficient power to detect the true effect.  
51  
52 353 Conversely, the between-group difference in fall rates was much greater when only individuals who  
53  
54  
55 354 completed at least 80% of initial training sessions and 1 booster session were included in the analysis.  
56  
57  
58  
59

1  
2 355 The booster sessions may have helped participants to retain the training benefits<sup>38,39</sup> by providing  
3  
4 356 participants with opportunity to practice reactive balance skills throughout the 12-month follow-up  
5  
6 357 period.  
7

8  
9 358 Importantly, the control group also completed balance training; previous studies using similar  
10  
11 359 exercise programs found no effect of balance training on fall rates in people with chronic stroke when  
12  
13 360 compared to a sham intervention<sup>7</sup> or 'usual care'.<sup>40</sup> Thus, we expect that control participants did not  
14  
15 361 have reduced fall risk as a result of completing this program. However, after the initial six week  
16  
17 362 training period, both groups improved balance confidence (ABC), anticipatory balance control (BBS  
18  
19 363 and mini-BEST anticipatory sub-scale score), and mobility (mini-BEST gait sub-scale score), with no  
20  
21 364 significant difference between groups on these measures post-training. It is possible that improved  
22  
23 365 balance and mobility led to reduced fall risk in the both groups compared to their pre-training fall risk..  
24  
25 366 Furthermore, it seems that PBT leads to similar improvements in anticipatory balance and mobility as a  
26  
27 367 traditional balance training program that is primarily focused on improving anticipatory balance  
28  
29 368 control.  
30  
31  
32  
33

34 369 Consistent with specificity of training, the PBT group improved reactive balance control  
35  
36 370 (reactive sub-scale of the mini-BEST), but the control group did not;<sup>41</sup> these improvements were  
37  
38 371 retained at 6- and 12-months. This finding agrees with those of Bhatt *et al.*, who found that resistance  
39  
40 372 to falling following a slip was retained up to 6-months after a single PBT session.<sup>39</sup> The mean between-  
41  
42 373 group difference in the reactive sub-scale of the mini-BEST ranged from 0.6 (post-training) to 1.6  
43  
44 374 points (12-month follow-up). We are unaware of any study reporting minimal clinically important  
45  
46 375 differences for the mini-BEST sub-scales; however, these between group differences represent 10-27%  
47  
48 376 of the maximum score for this sub-scale (6 points) and, therefore, we interpret these differences as  
49  
50 377 clinically meaningful. Despite these retained improvements in reactive balance control, PBT  
51  
52 378 participants did not have a significantly reduced fall risk than control participants. Falls occur when  
53  
54  
55  
56  
57  
58  
59  
60

1  
2 379 there is a loss of balance and subsequent failure to recover.<sup>42</sup> Improved reactive balance control  
3  
4 380 following PBT should help to prevent falls by improving the ability to recover from a loss of balance.  
5  
6 381 Loss of balance can occur due to an external force or failure of anticipatory balance control. Thus, it is  
7  
8  
9 382 possible that effective fall prevention post-stroke requires sustained improvements in both anticipatory  
10  
11 383 and reactive balance control; home exercise may help participants to retain improvements in  
12  
13 384 anticipatory balance control.<sup>40</sup>

15  
16 385 Contrary to our hypothesis, control participants reported greater social integration 6-12 months  
17  
18 386 post-training than the PBT group. Individual-item SIPSO scores suggest that this finding was primarily  
19  
20 387 driven by control participants reporting increased independence in moving around their local  
21  
22 388 neighbourhoods. The control training program included walking practice during every session, whereas  
23  
24  
25 389 the PBT program only included short bouts of walking in later sessions. This walking practice may  
26  
27 390 have increased control participants' confidence with community mobility. While increased social  
28  
29 391 integration at 6-12 months was not associated with improved physical function, it is likely that the tests  
30  
31 392 used in the current study do not correlate highly with community mobility.<sup>43</sup> Training-related  
32  
33  
34 393 improvements in balance and mobility in both groups, and increased self-reported participation in the  
35  
36 394 control group, were not associated with increased physical activity post-training. While impaired  
37  
38  
39 395 balance and mobility post-stroke may be a barrier to physical activity,<sup>44</sup> improved balance and mobility  
40  
41 396 alone is not sufficient to increase activity.<sup>7,45</sup> It is likely that an intervention that combines behaviour  
42  
43 397 change techniques with physical exercise is required to increase long-term participation in physical  
44  
45 398 activity.<sup>46</sup>

47  
48 399 Examining fall characteristics can provide further insight into intervention effects on falls.<sup>20</sup>  
49  
50 400 Individuals with stroke seem to be reliant upon upper-extremity reactions to prevent falls in daily life.<sup>29</sup>  
51  
52 401 In the current study, participants had something in their hands at the time of the fall for more control  
53  
54  
55 402 group falls than PBT falls, which may have prevented these individuals from using an upper-extremity  
56  
57  
58  
59  
60

1  
2 403 reaction to prevent the fall.<sup>47</sup> Conversely, training, with a specific focus on reactive stepping, may have  
3  
4 404 made PBT participants less reliant on upper extremity reactions to prevent falls. In agreement with a  
5  
6 405 previous study,<sup>20</sup> control participants were more likely than PBT participants to fall during transfers;  
7  
8  
9 406 this finding may support the idea that PBT helps to prevent falls in routine situations, but not falls in  
10  
11 407 more challenging situations. Participants required assistance to get up from the ground after more PBT  
12  
13 408 group than control group falls; this finding could suggest that those PBT participants who fell were  
14  
15  
16 409 more impaired than PBT participants who did not fall or than those in the control group who fell.  
17

## 20 411 **Limitations**

21  
22 412 The primary outcome (falls in daily life) was obtained via self-report. While the method of prospective  
23  
24  
25 413 falls reporting used in the current study is the best available,<sup>48</sup> falls may have been under-reported. The  
26  
27 414 cohort was, on average, relatively high functioning (e.g., median BBS score ~50/56), but had a wide  
28  
29  
30 415 range of physical function (minimum scores for CMSA leg: 3, CMSA foot: 2, BBS: 23, mini-BEST: 5;  
31  
32 416 maximum NIH-SS score: 13; highest TUG time: 119s). This study's findings apply to community-  
33  
34 417 dwelling individuals with chronic stroke who can stand independently for at least 30s. Group allocation  
35  
36 418 blinding was violated for 9 participants. Balance measures for these participants were re-scored by a  
37  
38  
39 419 truly blinded research assistant; however, knowledge of group allocation may have sub-consciously  
40  
41 420 influenced how other data were collected for these participants.  
42

43 421 PASIPD scores were higher at the time points when the questionnaire was administered in-  
44  
45  
46 422 person compared to over the telephone. Physical activity questionnaires, including the PASIPD,<sup>34</sup> are  
47  
48 423 often designed to have several methods of administration (e.g., self-administered via in-person or  
49  
50 424 telephone interview),<sup>49</sup> and investigators seem to treat administration methods as equivalent.<sup>50</sup> We are  
51  
52  
53 425 not aware of any study that directly compared scores from the PASIPD or any other physical activity  
54  
55 426 questionnaire when administered using different methods. It is possible that scores are higher when  
56  
57  
58  
59

1  
2 427 administered in-person versus over the telephone as participants' desire for social acceptance was  
3  
4 428 higher when they interacted directly with the research assistant. Alternatively, in-person administration  
5  
6 429 may have led to more accurate scores than telephone administration within this population, who may  
7  
8  
9 430 have subtle cognitive-communication deficits, as the research assistant and participant could avail of  
10  
11 431 non-verbal communication to facilitate completing the questionnaire. However, SIPSO scores did not  
12  
13 432 differ between telephone versus in-person administration. Finally, participants in the current study may  
14  
15  
16 433 have truly been more active in the week prior to the in-person interview compared to the telephone  
17  
18 434 interview to prepare for the tests of physical function. Future studies should investigate the potential  
19  
20 435 influence of administration methods on physical activity questionnaire scores.  
21  
22  
23 436

### 25 437 **Clinical implications**

26  
27 438 While this study found that PBT did not reduce fall rates among the entire cohort, PBT participants  
28  
29 439 improved on measures of balance and mobility, and retained the improvements in reactive balance  
30  
31  
32 440 control up to 12-months post-training. Combined with results of previous studies reporting reduced fall  
33  
34 441 rates following PBT among individuals with sub-acute stroke,<sup>20</sup> chronic stroke with a history of  
35  
36 442 falling,<sup>51</sup> and without stroke,<sup>14</sup> and showing that PBT is the only intervention with capacity to improve  
37  
38  
39 443 reactive balance control,<sup>41,52</sup> these results suggest that PBT may be a useful addition to existing balance  
40  
41 444 training post-stroke. The PBT program developed for this study used existing resources available in  
42  
43 445 many clinical settings and, therefore, could be relatively easily implemented in clinical practice. Joint  
44  
45  
46 446 pain was the most common adverse event related to PBT, which appeared to be most prevalent among  
47  
48 447 those with lower-extremity arthritis; these participants were able to complete training with  
49  
50 448 modifications to avoid exacerbating pain (e.g., temporarily reducing perturbation intensity). Therefore,  
51  
52  
53 449 modifications to PBT may be required for those with lower-extremity arthritis. Regular 'booster' PBT  
54  
55 450 training sessions may be necessary to prevent falls long-term.  
56  
57  
58  
59  
60

1

2 451

3

4 452 **Contributorship statement:** AM conceived of the study, is the grant holder, performed statistical

5

6 453 analysis and drafted the manuscript. AM, VGD, ASI, DB, ELI, and GM developed the study protocol.

7

8 454 AM and GM led implementation of the study at each site. AM, VGD, and ELI developed the

9

10 455 intervention. AA, AC and ASI collected data. CJD and SK delivered the interventions. All authors

11

12 456 approved the final manuscript.

13

14 457 **Competing interests statement:** The authors declare that they have no competing interests.

15

16 458 **Data sharing statement:** Due to research ethics and privacy restrictions, raw data for this study are

17

18 459 currently not available publicly.

19

20

21

22

23

24

25

26

27

28

29

30

31

32

33

34

35

36

37

38

39

40

41

42

43

44

45

46

47

48

49

50

51

52

53

54

55

56

57

58

59

60

**REFERENCES**

1. Batchelor FA, Mackintosh SF, Said CM, Hill KD. Falls after stroke. *Int J Stroke*. 2012;7(6):482-490.
2. Andersson ÅG, Kamwendo K, Apperlros P. Fear of falling in stroke patients: relationship with previous falls and functional characteristics. *Int J Rehabil Res*. 2008;31:261-264.
3. Schmid AA, Van Puymbroeck M, Altenburger PA, et al. Balance and balance self-efficacy are associated with activity and participation after stroke: a cross-sectional study in people with chronic stroke. *Arch Phys Med Rehabil*. 2012;93:1101-1107.
4. Sherrington C, Michaleff ZA, Fairhall N, et al. Exercise to prevent falls in older adults: an updated systematic review and meta-analysis. *Br J Sports Med*. 2016;doi:10.1136/bjsports-2016-096547.
5. Verheyden GS, Weerdesteyn V, Pickering RM, et al. Interventions for preventing falls in people after stroke. *Cochrane Database Syst Rev*. 2013;31(5):CD008728.
6. Batchelor F, Hill K, Mackintosh S, Said C. What works in falls prevention after stroke? a systematic review and meta-analysis. *Stroke*. 2010;41(8):1715-1722.
7. Dean CM, Rissel C, Sherrington C, et al. Exercise to enhance mobility and prevent falls after stroke: the community stroke club randomized trial. *Neurorehabil Neural Repair*. 2012;26(9):1046-1057.
8. Gardner MM, Buchner DM, Robertson MC, Campbell AJ. Practical implementation of an exercise-based falls prevention programme. *Age Ageing*. 2001;30:77-83.
9. Dean CM, Richards CL, Malouin F. Task-related circuit training improves performance of locomotor tasks in chronic stroke: a randomized controlled pilot trial. *Arch Phys Med Rehabil*. 2000;81:409-417.



- 1  
2 483 **10.** Eng JJ, Chu KS, Kim CM, Dawson AS, Carswell A, Hepburn KE. A community-based group  
3  
4 484 exercise program for persons with chronic stroke. *Med Sci Sports Exerc.* 2003;35(8):1271-1278.  
5
- 6 485 **11.** Salbach NM, Mayo NE, Wood-Dauphinee S, Hanley JA, Richards CL, Côté R. A task-oriented  
7  
8 486 intervention enhances walking distance and speed in the first year post stroke: a randomized  
9  
10 487 controlled trial. *Clin Rehabil.* 2004;18:509-519.  
11  
12
- 13 488 **12.** Maki BE, McIlroy WE. The role of limb movements in maintaining upright stance: the  
14  
15 489 "change-in-support" strategy. *Phys Ther.* 1997;77:488-507.  
16  
17
- 18 490 **13.** Gerards MHG, McCrum C, Mansfield A, Meijer K. Perturbation-based balance training for falls  
19  
20 491 reduction among older adults: current evidence and implications for clinical practice. *Geriatr*  
21  
22 492 *Gerontol Int.* 2017;17(12):2294-2303.  
23  
24
- 25 493 **14.** Mansfield A, Wong JS, Bryce J, Knorr S, Patterson KK. Does perturbation-based balance  
26  
27 494 training prevent falls? A review and meta-analysis of preliminary randomized controlled trials.  
28  
29 495 *Phys Ther.* 2015;95(5):700-709.  
30  
31
- 32 496 **15.** Mansfield A, Inness EL, Lakhani B, McIlroy WE. Determinants of limb preference for  
33  
34 497 initiating compensatory stepping post-stroke. *Arch Phys Med Rehabil.* 2012;93:1179-1184.  
35
- 36 498 **16.** de Kam D, Roelofs JMB, Bruijnes AKBD, Geurts ACH, Weerdesteyn V. The next step in  
37  
38 499 understanding impaired reactive balance control in people with stroke: the role of defective  
39  
40 500 early automatic postural responses. *Neurorehabil Neural Repair.* 2017;31(8):708-716.  
41  
42
- 43 501 **17.** Mansfield A, Wong JS, McIlroy WE, et al. Do measures of reactive balance control predict falls  
44  
45 502 in people with stroke returning to the community? *Physiotherapy.* 2015;101(4):373-380.  
46  
47
- 48 503 **18.** Mansfield A, Inness EL, Wong JS, Fraser JE, McIlroy WE. Is impaired control of reactive  
49  
50 504 stepping related to falls during inpatient stroke rehabilitation? *Neurorehabil Neural Repair.*  
51  
52 505 2013;27(6):526-533.  
53  
54  
55  
56  
57  
58  
59  
60

- 1  
2 506 **19.** Mansfield A, Inness EL, Komar J, et al. Training rapid stepping responses in an individual with  
3  
4 507 stroke. *Phys Ther.* 2011;91(6):958-969.  
5
- 6 508 **20.** Mansfield A, Schinkel-Ivy A, Danells CJ, et al. Does perturbation training prevent falls after  
7  
8 discharge from stroke rehabilitation? A prospective cohort study with historical control. *J*  
9 509 *Stroke Cerebrovasc Dis.* 2017;26(10):2174-2180.  
10  
11 510  
12
- 13 511 **21.** Mansfield A, Aquilino A, Centen A, et al. Perturbation training to promote safe independent  
14  
15 mobility post-stroke: study protocol for a randomized controlled trial. *BMC Neurol.* 2015;15:87.  
16 512  
17
- 18 513 **22.** Schulz KF, Altman DG, Moher D. CONSORT 2010 statement: updated guidelines for reporting  
19  
20 514 parallel group randomised trials. *Br Med J.* 2010;340:c332.  
21  
22
- 23 515 **23.** Hoffman TC, Glasziou PP, Milne R, et al. Better reporting of interventions: template for  
24  
25 516 intervention description and replication (TIDieR) checklist and guide. *Br Med J.* 2014;345:1687.  
26
- 27 517 **24.** Thomas S, Reading J, Shephard RI. Revision of the Physical Activity Readiness Questionnaire  
28  
29 518 (PAR-Q). *Can J Sport Sci.* 1992;174:338-345.  
30  
31
- 32 519 **25.** French E, Reinikka K, MacLeod A. Community-based exercise for people living with stroke.  
33  
34 520 [http://www.tbrhsc.net/clinical\\_partners/regional\\_stroke\\_program/video\\_resources/community](http://www.tbrhsc.net/clinical_partners/regional_stroke_program/video_resources/community_based_exercise.asp)  
35  
36 521 [based\\_exercise.asp](http://www.tbrhsc.net/clinical_partners/regional_stroke_program/video_resources/community_based_exercise.asp). Accessed 1 Aug, 2013.  
37  
38
- 39 522 **26.** Shumway-Cook A, Woollacott MH. *Motor control: translating research into clinical practice.*  
40  
41 523 3rd ed. Philadelphia: Lippincott Williams & Wilkins; 2007.  
42
- 43 524 **27.** Goldstein LB, Bertels C, Davis JN. Interrater reliability of the NIH Stroke Scale. *Arch Neurol.*  
44  
45 525 1989;46(6):660-662.  
46  
47
- 48 526 **28.** Gowland C, Stratford P, Ward M, et al. Measuring physical impairment and disability with the  
49  
50 527 Chedoke-McMaster Stroke Assessment. *Stroke.* 1993;24:58-63.  
51  
52  
53  
54  
55  
56  
57  
58  
59  
60

- 1  
2 528 **29.** Hyndman D, Ashburn A, Stack E. Fall events among people with stroke living in the  
3  
4 529 community: circumstances of falls and characteristics of fallers. *Arch Phys Med Rehabil.*  
5  
6 530 2002;83:165-170.
- 8  
9 531 **30.** Berg K, Wood-Dauphinée S, Williams JI, Gayton D. Measuring balance in the elderly:  
10  
11 532 preliminary development of an instrument. *Physiother Can.* 1989;41:304-311.
- 13  
14 533 **31.** Frachignoni F, Horak F, Godi M, Nardone A, Giordani A. Using psychometric techniques to  
15  
16 534 improve the balance evaluation systems test: the mini-BES test. *J Rehabil Med.*  
17  
18 535 2010;42(4):323-331.
- 20  
21 536 **32.** Podsiadlo D, Richardson S. The Timed "Up & Go": A test of basic functional mobility for frail  
22  
23 537 elderly persons. *J Am Geriatr Soc.* 1991;39:142-148.
- 25  
26 538 **33.** Powell LE, Myers AM. The Activities-specific Balance Confidence (ABC) Scale. *J Gerontol A*  
27 539 *Biol Sci Med Sci.* 1995;50A(1):M28-34.
- 29  
30 540 **34.** Washburn RA, Zhu W, McAuley E, Frogley M, Figoni SF. The Physical Activity Scale for  
31  
32 541 Individuals with Physical Disabilities: development and evaluation. *Arch Phys Med Rehabil.*  
33  
34 542 2002;83:193-200.
- 36  
37 543 **35.** Trigg R, Wood VA. The Subjective Index of Physical and Social Outcome (SIPSO): a new  
38  
39 544 measure for use with stroke patients. *Clin Rehabil.* 2000;14(3):288-299.
- 41  
42 545 **36.** Tang Y. Sample size estimation for negative binomial regression comparing rates of recurrent  
43  
44 546 events with unequal follow-up time. *J Biopharm Stat.* 2015;25(5):1100-1113.
- 45  
46 547 **37.** Conover WJ, Iman RL. Analysis of variance using the rank transform. *Biometrics.*  
47  
48 548 1982;38(3):715-724.
- 50  
51 549 **38.** van Duijnhoven HJR, De Kam D, Hellebrand W, Smulders E, Geurts ACH, Weerdesteyn V.  
52  
53 550 Development and process evaluation of a 5-week exercise program to prevent falls in people  
54  
55 551 after stroke: the FALLS program. *Stroke Res Treat.* 2012;2012:407693.

- 1  
2 552 **39.** Bhatt T, Yang F, Pai Y-C. Learning to resist gait-slip falls: long-term retention in community-  
3  
4 553 dwelling older adults. *Arch Phys Med Rehabil.* 2012;93:557-564.  
5
- 6 554 **40.** Batchelor FA, Hill KD, Mackintosh SF, Said CM, Whitehead CH. Effects of a multifactorial  
7  
8 falls prevention program for people with stroke returning home after rehabilitation: a  
9 555 randomized controlled trial. *Arch Phys Med Rehabil.* 2012;93(9):1648-1655.  
10  
11 556
- 13 557 **41.** Mansfield A, Peters AL, Liu BA, Maki BE. Effect of a perturbation-based balance-training  
14  
15 program on compensatory stepping and grasping reactions in older adults: a randomized  
16 558 controlled trial. *Phys Ther.* 2010;90(4):476-491.  
17  
18 559
- 20 560 **42.** Maki BE, McIlroy WE. Postural control in the older adult. *Clin Geriatr Med.* 1996;12(4):635-  
21  
22 658.  
23 561
- 25 562 **43.** Robinson CA, Shumway-Cook A, Matsuda PN, Ciol MA. Understanding physical factors  
26  
27 563 associated with participation in community ambulation following stroke. *Disabil Rehabil.*  
28  
29 564 2011;33(12):1033-1042.  
30
- 32 565 **44.** Nicholson S, Sniehotta FF, van Wijck F, et al. A systematic review of perceived barriers and  
33  
34 566 motivators to physical activity after stroke. *Int J Stroke.* 2013;8:357-364.  
35
- 36 567 **45.** Mudge S, Barber PA, Stott S. Circuit-based rehabilitation improves gait endurance but not usual  
37  
38 walking activity in chronic stroke: a randomized controlled trial. *Arch Phys Med Rehabil.*  
39 568 2009;90:1989-1996.  
40  
41 569
- 43 570 **46.** Morris JH, MacGillivray S, Mcfarlane S. Interventions to promote long-term participation in  
44  
45 physical activity after stroke: a systematic review of the literature. *Arch Phys Med Rehabil.*  
46 571 2014;95:956-967.  
47  
48 572
- 50 573 **47.** Bateni H, Zecevic A, McIlroy WE, Maki BE. Resolving conflicts in task demands during  
51  
52 574 balance recovery: does holding an object inhibit compensatory grasping? *Exp Brain Res.*  
53  
54 2004;157:49-58.  
55 575  
56  
57  
58  
59  
60

1  
2  
3  
4  
5  
6  
7  
8  
9  
10  
11  
12  
13  
14  
15  
16  
17  
18  
19  
20  
21  
22  
23  
24  
25  
26  
27  
28  
29  
30  
31  
32  
33  
34  
35  
36  
37  
38  
39  
40  
41  
42  
43  
44  
45  
46  
47  
48  
49  
50  
51  
52  
53  
54  
55  
56  
57  
58  
59  
60

- 576 **48.** Lamb SE, Jørstad-Stein EC, Hauer K, Becker C. Development of a common outcome data set  
577 for fall injury prevention trials: The Prevention of Falls Network Europe consensus. *J Am*  
578 *Geriatr Soc.* 2005;53(9):1618-1622.
- 579 **49.** Strath SJ, Kaminsky LA, Ainsworth BE, et al. Guide to the assessment of physical activity:  
580 clinical and research applications. A scientific statement from the American Heart Association.  
581 *Circulation.* 2013;128:2259-2279.
- 582 **50.** Craig CL, Marshall AL, Sjöström M, et al. International physical activity questionnaire: 12-  
583 country reliability and validity. *Med Sci Sports Exerc.* 2003;35(8):1381-1395.
- 584 **51.** Marigold DS, Eng JJ, Dawson AS, Inglis JT, Harris JE, Gylfadóttir S. Exercise leads to faster  
585 postural reflexes, improved balance and mobility, and fewer falls in older persons with chronic  
586 stroke. *J Am Geriatr Soc.* 2005;53:416-423.
- 587 **52.** Smith GV, Forrester LW, Silver KHC, Macko RF. Effects of treadmill training on translational  
588 balance perturbation responses in chronic hemiparetic stroke patients. *J Stroke Cerebrovasc*  
589 *Dis.* 2000;9:238-245.
- 590 **53.** Robinovitch SN, Feldman F, Yang Y, et al. Video capture of the circumstances of falls in  
591 elderly people residing in long-term care: an observational study. *Lancet.* 2013;381(9860):47-  
592 54.

1  
2 596 **TABLES**

3  
4 597 **Table 1: Participant characteristics at study enrolment.** Values presented are medians with  
5  
6 598 interquartile range in parentheses (for continuous/ordinal variables) or number with percentage in  
7  
8 parentheses (for count/frequency variables). The p-value is for the Wilcoxon-Mann-Whitney test  
9 599  
10  
11 600 (continuous/ordinal variables) or Fisher's exact test (count/frequency variables).

|                                   | <b>PBT<br/>(n=41)</b> | <b>Control<br/>(n=42)</b> | <b><i>p-value</i></b> |
|-----------------------------------|-----------------------|---------------------------|-----------------------|
| Age (years)                       | 66 (17)               | 67 (13)                   | 0.84                  |
| Sex (number, %)                   |                       |                           |                       |
| Female                            | 15 (36.6)             | 12 (28.6)                 | 0.49                  |
| Male                              | 26 (63.4)             | 30 (71.4)                 |                       |
| Time post-stroke (years)          | 2.0 (3.3)             | 3.2 (4.5)                 | 0.086                 |
| More affected side (number, %)    |                       |                           |                       |
| Left                              | 22 (53.7)             | 22 (52.4)                 | >0.99                 |
| Right                             | 19 (46.3)             | 20 (47.6)                 |                       |
| NIH-SS (score)                    | 3 (4)                 | 3 (5)                     | 0.57                  |
| CMSA leg (score)                  | 5 (1)                 | 5 (1)                     | 0.54                  |
| CMSA foot (score)                 | 5 (3)                 | 5 (1)                     | 0.45                  |
| ABC scale (%)                     | 65.6 (26.3)           | 79.1 (33.8)               | 0.42                  |
| BBS (score)                       | 50 (10)               | 51 (7)                    | 0.94                  |
| Mini-BEST (score)                 | 18 (7)                | 18 (5)                    | 0.95                  |
| TUG (s)                           | 14.4 (12.3)           | 13.0 (7.6)                | 0.62                  |
| PASIPD (score)                    | 8.4 (9.5)             | 11.6 (10.9)               | 0.48                  |
| SIPSO (score)                     | 30 (9)                | 31 (13)                   | 0.74                  |
| Fall in the past year (number, %) |                       |                           |                       |
| Yes                               | 17 (41.5)             | 18 (42.9)                 | >0.99                 |
| No                                | 24 (58.5)             | 24 (57.1)                 |                       |

39 601 ABC=Activities-specific Balance Confidence scale, BBS=Berg Balance Scale, mini-BEST=mini-  
40  
41 602 Balance Evaluation Systems Test, CMSA=Chedoke-McMaster Stroke Assessment, NIH-SS=National  
42  
43 603 Institutes of Health Stroke Scale; PASIPD=Physical Activity Scale for Individuals with Physical  
44  
45  
46 604 Disabilities, SIPSO=Subjective Index of Physical and Social Outcome.

48 605

49  
50  
51  
52  
53  
54  
55  
56  
57  
58  
59  
60

1  
 2 606 **Table 2: Falls between groups.** Values presented are absolute number of participants, or rate of falls  
 3  
 4 607 per person-year. The p-value is for the difference in falls or fall rates from logistic regression or  
 5  
 6 608 negative binomial regression, respectively.

|                                               | <b>PBT</b> | <b>Control</b> | <b><i>p-value</i></b> |
|-----------------------------------------------|------------|----------------|-----------------------|
| <b>Intent-to-treat analysis</b>               |            |                |                       |
| Participants (number)                         | 41         | 42             |                       |
| Participants reporting $\geq 1$ fall (number) | 19         | 23             | <i>0.44</i>           |
| Falls (total number)                          | 53         | 64             |                       |
| Falls (number per person-year)                | 1.45       | 1.72           | <i>0.63</i>           |
| <b>Per-protocol analysis</b>                  |            |                |                       |
| Participants (number)                         | 32         | 34             |                       |
| Participants reporting $\geq 1$ fall (number) | 14         | 20             | <i>0.25</i>           |
| Falls (total number)                          | 32         | 57             |                       |
| Falls (number per person-year)                | 1.07       | 1.75           | <i>0.20</i>           |

1  
2 611 **Table 3: Balance and mobility measures between groups.** Values presented are least-square means  
3  
4 612 with 95% confidence intervals in brackets. The p-value is for the ANCOVA comparing groups at each  
5  
6 613 time point, controlling for the baseline value.  
7

|                           | <b>PBT</b>        | <b>Control</b>    | <b><i>p-value</i></b> |
|---------------------------|-------------------|-------------------|-----------------------|
| <b>Post-training</b>      |                   |                   |                       |
| N                         | 39                | 38                |                       |
| ABC (%)                   | 75.6 [71.6, 79.7] | 78.2 [74.1, 82.2] | 0.97                  |
| BBS (score)               | 50.8 [50.0, 51.7] | 51.2 [50.3, 52.1] | 0.99                  |
| Mini-BEST (score)         | 20.3 [19.6, 21.0] | 20.1 [19.3, 20.8] | 0.96                  |
| BEST-anticipatory (score) | 4.4 [4.2, 4.6]    | 4.4 [4.2, 4.6]    | 0.94                  |
| BEST-reactive (score)     | 4.2 [3.7, 4.7]    | 3.6 [3.0, 4.1]    | 0.044                 |
| BEST-sensory (score)      | 5.3 [5.2, 5.5]    | 5.6 [5.4, 5.7]    | 0.0084                |
| BEST-gait (score)         | 6.4 [6.0, 6.7]    | 6.6 [6.2, 7.0]    | 0.44                  |
| TUG (s)                   | 17.5 [15.8, 19.2] | 17.4 [15.7, 19.1] | 0.30                  |
| <b>6-month follow-up</b>  |                   |                   |                       |
| N                         | 30*               | 30*               |                       |
| ABC (%)                   | 75.4 [70.1, 80.8] | 74.1 [68.6, 79.5] | 0.70                  |
| BBS (score)               | 50.2 [49.2, 51.2] | 51.3 [50.3, 52.4] | 0.11                  |
| Mini-BEST (score)         | 19.8 [18.9, 20.7] | 19.1 [18.2, 20.0] | 0.81                  |
| BEST-anticipatory (score) | 4.3 [4.0, 4.6]    | 4.3 [4.0, 4.6]    | 0.99                  |
| BEST-reactive (score)     | 4.0 [3.4, 4.5]    | 2.9 [2.3, 3.4]    | 0.0055                |
| BEST-sensory (score)      | 5.4 [5.1, 5.7]    | 5.4 [5.2, 5.7]    | 0.44                  |
| BEST-gait (score)         | 6.2 [5.6, 6.7]    | 6.5 [6.0, 7.1]    | 0.25                  |
| TUG (s)                   | 16.8 [15.3, 18.2] | 15.4 [13.9, 16.9] | 0.32                  |
| <b>12-month follow-up</b> |                   |                   |                       |
| N                         | 27 <sup>†</sup>   | 29 <sup>†</sup>   |                       |
| ABC (%)                   | 75.2 [69.3, 81.1] | 78.1 [72.1, 84.0] | 0.95                  |
| BBS (score)               | 50.6 [49.5, 51.6] | 51.1 [50.0, 52.1] | 0.27                  |
| Mini-BEST (score)         | 20.6 [19.4, 21.8] | 18.7 [17.5, 19.8] | 0.049                 |
| BEST-anticipatory (score) | 4.3 [4.0, 4.6]    | 4.3 [3.9, 4.6]    | 0.45                  |
| BEST-reactive (score)     | 4.2 [3.6, 4.9]    | 2.6 [2.0, 3.2]    | 0.0013                |
| BEST-sensory (score)      | 5.4 [5.1, 5.7]    | 5.4 [5.1, 5.6]    | 0.64                  |
| BEST-gait (score)         | 6.6 [6.0, 7.3]    | 6.5 [5.9, 7.1]    | 0.90                  |
| TUG (s)                   | 15.7 [14.3, 17.2] | 17.3 [15.9, 18.7] | 0.79                  |

45 614 ABC=activities-specific balance confidence scale; BBS=Berg balance scale; BEST=balance evaluation  
46  
47 615 systems test.  
48

49 616 \*N=32 PBT and 31 control for the ABC at 6-month follow-up. <sup>†</sup>N=31 PBT and 31 control for the ABC  
50  
51  
52 617 at 12-month follow-up.  
53  
54  
55  
56  
57  
58  
59  
60



**Table 4: Physical activity and social integration between groups.** Values presented are least-square means with 95% confidence intervals in brackets The p-value is for the ANCOVA comparing groups at each time point, controlling for the baseline value.

|                           | <b>PBT</b>        | <b>Control</b>     | <i>p-value</i> |
|---------------------------|-------------------|--------------------|----------------|
| <b>Post-training</b>      |                   |                    |                |
| N                         | 39                | 38                 |                |
| PASIPD (score)            | 12.3 [10.0, 14.6] | 11.2 [8.8, 13.6]   | 0.92           |
| SIPSO (score)             | 29.8 [28.1, 31.4] | 31.2 [29.5, 32.9]  | 0.29           |
| <b>2-month follow-up</b>  |                   |                    |                |
| N                         | 38                | 31                 |                |
| PASIPD (score)            | 8.6 [6.4, 10.8]   | 9.5 [7.1, 11.9]    | 0.51           |
| SIPSO (score)             | 29.7 [28.2, 31.2] | 31.5 [29.8, 33.21] | 0.23           |
| <b>4-month follow-up</b>  |                   |                    |                |
| N                         | 33                | 34                 |                |
| PASIPD (score)            | 9.2 [7.3, 11.2]   | 7.8 [5.9, 9.8]     | 0.34           |
| SIPSO (score)             | 30.0 [28.2, 31.9] | 30.2 [28.4, 32.0]  | 0.62           |
| <b>6-month follow-up</b>  |                   |                    |                |
| N                         | 32                | 31*                |                |
| PASIPD (score)            | 11.3 [7.3, 15.3]  | 10.9 [6.8, 15.0]   | 0.21           |
| SIPSO (score)             | 30.3 [29.0, 31.6] | 32.6 [31.3, 33.9]  | 0.012          |
| <b>8-month follow-up</b>  |                   |                    |                |
| N                         | 31                | 26                 |                |
| PASIPD (score)            | 7.0 [5.6, 8.4]    | 6.9 [5.4, 8.5]     | 0.61           |
| SIPSO (score)             | 30.5 [29.3, 31.7] | 32.3 [31.0, 33.6]  | 0.037          |
| <b>10-month follow-up</b> |                   |                    |                |
| N                         | 32                | 32                 |                |
| PASIPD (score)            | 7.0 [5.5, 8.5]    | 8.2 [6.7, 9.7]     | 0.16           |
| SIPSO (score)             | 29.9 [28.4, 31.3] | 32.3 [30.9, 33.8]  | 0.031          |
| <b>12-month follow-up</b> |                   |                    |                |
| N                         | 31                | 31                 |                |
| PASIPD (score)            | 11.1 [7.4, 14.8]  | 10.1 [6.4, 13.9]   | 0.27           |
| SIPSO (score)             | 30.6 [29.1, 32.0] | 32.6 [31.1, 34.0]  | 0.047          |

PASIPD=physical activity scale for individuals with physical disabilities; SIPSO=subjective index of physical and social outcome

\*N=30 control for the SIPSO

1  
 2 624 **Table 5: Between-group comparison of fall circumstances.** Values are the number of falls in each  
 3  
 4 625 category, with the percentage of falls in parentheses. The percentage was calculated from the total  
 5  
 6 626 number of falls for which information was available (i.e., “do not recall” responses were excluded from  
 7  
 8  
 9 627 the denominator). Percentages might not sum to 100 due to rounding error. The p-value is for Fisher’s  
 10  
 11 628 exact test comparing the two groups, excluding “do not recall” responses from analysis.

|                                            | <b>PBT<br/>(53 falls)</b> | <b>Control<br/>(64 falls)</b> | <b><i>p-value</i></b> |
|--------------------------------------------|---------------------------|-------------------------------|-----------------------|
| Cause of fall                              |                           |                               |                       |
| Do not recall                              | 8                         | 6                             |                       |
| Slip                                       | 16 (35.6)                 | 22 (37.9)                     | 0.26                  |
| Trip                                       | 11 (24.4)                 | 6 (10.3)                      |                       |
| Push/external force                        | 1 (2.2)                   | 3 (5.2)                       |                       |
| Incorrect weight transfer <sup>53</sup>    | 17 (37.8)                 | 27 (46.6)                     |                       |
| Posture at the time of the fall            |                           |                               |                       |
| Do not recall                              | 7                         | 4                             |                       |
| Lying                                      | 1 (2.2)                   | 0 (0)                         | 0.33                  |
| Sitting                                    | 4 (8.9)                   | 7 (12.1)                      |                       |
| Standing                                   | 9 (20.0)                  | 6 (10.3)                      |                       |
| Walking                                    | 32 (68.9)                 | 47 (77.6)                     |                       |
| Motor activity at the time of the fall     |                           |                               |                       |
| Do not recall                              | 7                         | 4                             |                       |
| Not moving                                 | 4 (8.9)                   | 2 (3.5)                       | 0.010                 |
| Transferring                               | 2 (4.4)                   | 12 (20.7)                     |                       |
| Turning/reaching/bending                   | 10 (22.2)                 | 4 (5.2)                       |                       |
| Walking on level surface                   | 18 (37.8)                 | 20 (34.5)                     |                       |
| Walking on ramp/stairs/uneven surface      | 12 (26.7)                 | 22 (36.2)                     |                       |
| Cognitive activity at the time of the fall |                           |                               |                       |
| Do not recall                              | 10                        | 9                             |                       |
| None                                       | 34 (78.6)                 | 44 (81.1)                     | 0.80                  |
| Distracted                                 | 9 (21.4)                  | 11 (18.9)                     |                       |
| Where did the fall occur                   |                           |                               |                       |
| Outdoors                                   | 19 (35.8)                 | 22 (34.4)                     | >0.99                 |
| Indoors                                    | 34 (64.2)                 | 42 (65.6)                     |                       |
| Using an assistive device                  |                           |                               |                       |
| Do not recall                              | 7                         | 5                             |                       |
| Never use one                              | 11                        | 23                            |                       |
| No                                         | 16 (45.7)                 | 24 (66.7)                     | 0.096                 |
| Yes                                        | 19 (54.3)                 | 12 (33.3)                     |                       |
| Holding onto a handrail                    |                           |                               |                       |
| Do not recall                              | 7                         | 6                             |                       |
| No                                         | 41 (89.1)                 | 48 (82.8)                     | 0.41                  |
| Yes                                        | 5 (10.9)                  | 10 (17.2)                     |                       |

629

57

58

59

60

|                                               | <b>PBT<br/>(53 falls)</b> | <b>Control<br/>(64 falls)</b> | <i>p-value</i> |
|-----------------------------------------------|---------------------------|-------------------------------|----------------|
| Anything in hands                             |                           |                               |                |
| Do not recall                                 | 9                         | 6                             |                |
| No                                            | 34 (77.3)                 | 32 (55.2)                     | 0.023          |
| Yes (one or both hands)                       | 10 (22.7)                 | 26 (44.8)                     |                |
| Action to try to prevent the fall             |                           |                               |                |
| Do not recall                                 | 9                         | 18                            |                |
| None                                          | 27 (61.4)                 | 28 (60.9)                     | 0.18           |
| Grasp                                         | 8 (18.2)                  | 14 (30.4)                     |                |
| Step or step + grasp                          | 9 (20.5)                  | 4 (8.7)                       |                |
| Length of lie on floor or ground              |                           |                               |                |
| Do not recall                                 | 7                         | 4                             |                |
| A few minutes or less                         | 39 (84.8)                 | 57 (95.0)                     | 0.098          |
| More than a few minutes but less than an hour | 7 (15.2)                  | 3 (5.0)                       |                |
| Assistance required to get up from fall       |                           |                               |                |
| Do not recall                                 | 7                         | 4                             |                |
| No                                            | 24 (52.2)                 | 44 (73.3)                     | 0.040          |
| Yes                                           | 22 (47.8)                 | 16 (26.7)                     |                |
| Injuries                                      |                           |                               |                |
| Do not recall                                 | 7                         | 5                             |                |
| None                                          | 28 (60.9)                 | 39 (66.1)                     | 0.68*          |
| Cuts or bruises                               | 17 (37.0)                 | 19 (32.2)                     |                |
| Joint sprain or dislocation                   | 1 (2.2)                   | 1 (1.7)                       |                |
| Medical assistance required after fall        |                           |                               |                |
| Do not recall                                 | 7                         | 5                             |                |
| No injuries                                   | 30                        | 42                            |                |
| Injured but did not seek treatment            | 16 (100)                  | 14 (82.4)                     | 0.23†          |
| Saw other healthcare professional             | 0 (0)                     | 1 (5.9)                       |                |
| Treated in hospital emergency room            | 0 (0)                     | 2 (11.8)                      |                |

\*Analysis compared injury vs no injury

†Analysis compared sought treatment vs did not seek treatment

1  
2 633 **FIGURE CAPTIONS**  
3

4 634 **Figure 1: Participant flow through the study.** Eight participants who consented to participate in the  
5  
6 635 study were excluded on the initial assessment because they could not tolerate the lean-and-release  
7  
8  
9 636 postural perturbations. Participants were withdrawn after randomization because it became apparent  
10  
11 637 that they did not meet the study criteria (1 PBT participant had osteoporosis with history of fracture,  
12  
13 638 and 1 control participant had uncontrolled hypertension), or because they had a significant decline in  
14  
15  
16 639 health during the training portion of the study (1 PBT and 1 control participant). One PBT participant  
17  
18 640 was withdrew from the study because she did not like the group allocation. Therefore, there were 42  
19  
20 641 control participants and 41 PBT participants available for analysis of the primary outcome (falls in  
21  
22 642 daily life). Participants withdrew during the 12-month follow-up period because they: no longer wished  
23  
24  
25 643 to be in the study (2 PBT, 1 control); experienced a serious adverse event (2 PBT, 5 control); were lost  
26  
27 644 to follow-up (2 PBT, 3 control); or enrolled in a conflicting study (2 PBT).  
28

29  
30 645  
31  
32  
33  
34  
35  
36  
37  
38  
39  
40  
41  
42  
43  
44  
45  
46  
47  
48  
49  
50  
51  
52  
53  
54  
55  
56  
57  
58  
59  
60

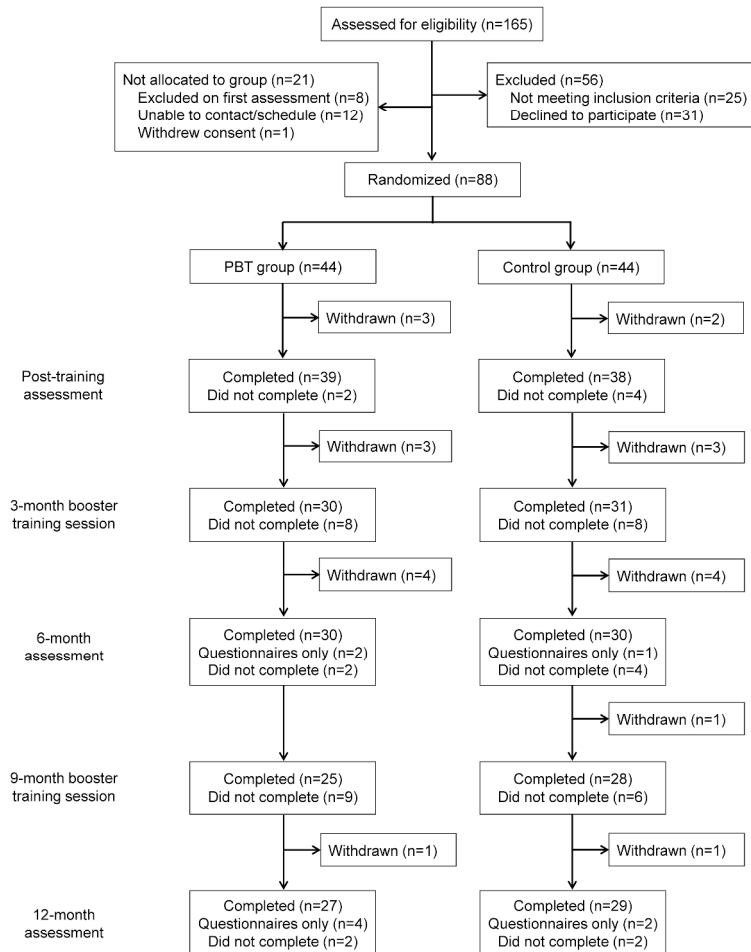

Figure 1: Participant flow through the study. Eight participants who consented to participate in the study were excluded on the initial assessment because they could not tolerate the lean-and-release postural perturbations. Participants were withdrawn after randomization because it became apparent that they did not meet the study criteria (1 PBT participant had osteoporosis with history of fracture, and 1 control participant had uncontrolled hypertension), or because they had a significant decline in health during the training portion of the study (1 PBT and 1 control participant). One PBT participant was withdrawn from the study because she did not like the group allocation. Therefore, there were 42 control participants and 41 PBT participants available for analysis of the primary outcome (falls in daily life). Participants withdrew during the 12-month follow-up period because they: no longer wished to be in the study (2 PBT, 1 control); experienced a serious adverse event (2 PBT, 5 control); were lost to follow-up (2 PBT, 3 control); or enrolled in a conflicting study (2 PBT).

300x400mm (300 x 300 DPI)

1  
2  
3  
4  
5  
6  
7  
8  
9  
10  
11  
12  
13  
14  
15  
16  
17  
18  
19  
20  
21  
22  
23  
24  
25  
26  
27  
28  
29  
30  
31  
32  
33  
34  
35  
36  
37  
38  
39  
40  
41  
42  
43  
44  
45  
46  
47  
48  
49  
50  
51  
52  
53  
54  
55  
56  
57  
58  
59  
60

For peer review only

1  
2  
3  
4  
5  
6  
7  
8  
9

## SUPPLEMENTARY TABLES

**Table S1: Balance and mobility measures, change over time.** Values presented are the differences from pre-training with 95% confidence intervals in brackets. A positive difference value indicates an improvement for all variables except the TUG, where a negative value indicates an improvement (i.e., faster TUG time compared to baseline).

|                           | PBT              | Control          |
|---------------------------|------------------|------------------|
| <b>Post-training</b>      |                  |                  |
| N                         | 39               | 38               |
| ABC (%)                   | 5.2 [0.7, 9.8]   | 6.6 [1.5, 11.6]  |
| BBS (score)               | 1.8 [0.7, 2.9]   | 1.9 [1.0, 2.9]   |
| Mini-BEST (score)         | 2.6 [1.8, 3.4]   | 2.2 [1.5, 3.0]   |
| BEST-anticipatory (score) | 0.5 [0.2, 0.8]   | 0.5 [0.2, 0.8]   |
| BEST-reactive (score)     | 1.5 [0.9, 2.1]   | 0.8 [0.3, 1.2]   |
| BEST-sensory (score)      | 0 [-0.2, 0.2]    | 0.3 [0.0, 0.5]   |
| BEST-gait (score)         | 0.6 [0.1, 1.0]   | 0.7 [0.3, 1.1]   |
| TUG (s)                   | -1.0 [-2.9, 0.8] | -1.1 [-2.8, 0.5] |
| <b>6-month follow-up</b>  |                  |                  |
| N                         | 30*              | 30*              |
| ABC (%)                   | 3.5 [-2.3, 9.2]  | 0.6 [-5.2, 6.3]  |
| BBS (score)               | 0.3 [-0.8, 1.4]  | 1.3 [0.2, 2.4]   |
| Mini-BEST (score)         | 1.6 [0.6, 2.6]   | 0.8 [-0.1, 1.7]  |
| BEST-anticipatory (score) | 0.3 [-0.1, 0.6]  | 0.3 [-0.1, 0.7]  |
| BEST-reactive (score)     | 1.2 [0.5, 1.8]   | 0.0 [-0.5, 0.5]  |
| BEST-sensory (score)      | 0.1 [-0.2, 0.3]  | 0.2 [-0.1, 0.5]  |
| BEST-gait (score)         | 0.1 [-0.6, 0.8]  | 0.3 [-0.1, 0.8]  |
| TUG (s)                   | 1.0 [-1.0, 2.9]  | -0.5 [-1.4, 0.5] |
| <b>12-month follow-up</b> |                  |                  |
| N                         | 27†              | 29†              |
| ABC (%)                   | 3.5 [-3.1, 10.2] | 3.8 [-2.7, 10.3] |
| BBS (score)               | 0.6 [-0.7, 1.8]  | 0.8 [-0.3, 2.0]  |
| Mini-BEST (score)         | 2.2 [0.9, 3.4]   | 0.1 [-1.1, 1.4]  |
| BEST-anticipatory (score) | 0.2 [-0.1, 0.5]  | 0.2 [-0.2, 0.7]  |
| BEST-reactive (score)     | 1.4 [0.5, 2.3]   | -0.4 [-1.0, 0.2] |
| BEST-sensory (score)      | 0.1 [-0.2, 0.4]  | 0.1 [-0.1, 0.4]  |
| BEST-gait (score)         | 0.4 [-0.3, 1.2]  | 0.2 [-0.4, 0.8]  |
| TUG (s)                   | 0.1 [-1.0, 1.2]  | 1.6 [-0.4, 3.6]  |

ABC=activities-specific balance confidence scale; BBS=Berg balance scale; BEST=balance evaluation systems test.

\*N=32 PBT and 31 control for the ABC at 6-month follow-up. †N=31 PBT and 31 control for the ABC at 12-month follow-up.

**Table S2: Physical activity and social integration, change over time.** Values presented are the difference from pre-training with 95% confidence intervals in brackets. A positive difference value indicates an improvement.

|                           | <b>PBT</b>        | <b>Control</b>    |
|---------------------------|-------------------|-------------------|
| <b>Post-training</b>      |                   |                   |
| N                         | 39                | 38                |
| PASIPD (score)            | 1.1 [-2.0, 4.2]   | -1.0 [-3.1, 1.0]  |
| SIPSO (score)             | 0.5 [-1.4, 2.5]   | 1.8 [0.0, 3.7]    |
| <b>2-month follow-up</b>  |                   |                   |
| N                         | 38                | 31                |
| PASIPD (score)            | -2.1 [-5.1, 0.8]  | -2.8 [-5.8, 0.3]  |
| SIPSO (score)             | -0.1 [-1.7, 1.6]  | 1.5 [-0.4, 3.4]   |
| <b>4-month follow-up</b>  |                   |                   |
| N                         | 33                | 34                |
| PASIPD (score)            | -1.7 [-4.2, 0.8]  | -4.1 [-6.6, -1.5] |
| SIPSO (score)             | 0.5 [-1.2, 2.2]   | 0.7 [-1.3, 2.7]   |
| <b>6-month follow-up</b>  |                   |                   |
| N                         | 32                | 31*               |
| PASIPD (score)            | 0.4 [-5.3, 6.2]   | -2.2 [-5.6, 1.1]  |
| SIPSO (score)             | 0.3 [-1.0, 1.7]   | 2.5 [0.8, 4.2]    |
| <b>8-month follow-up</b>  |                   |                   |
| N                         | 31                | 26                |
| PASIPD (score)            | -4.5 [-7.3, -1.6] | -5.7 [-9.7, -1.6] |
| SIPSO (score)             | 0.2 [-1.1, 1.5]   | 1.8 [0.4, 3.3]    |
| <b>10-month follow-up</b> |                   |                   |
| N                         | 32                | 32                |
| PASIPD (score)            | -4.1 [-6.6, -1.7] | -3.5 [-6.7, -0.4] |
| SIPSO (score)             | -0.3 [-1.6, 1.0]  | 2.2 [0.4, 3.9]    |
| <b>12-month follow-up</b> |                   |                   |
| N                         | 31                | 31                |
| PASIPD (score)            | 0.4 [-4.6, 5.4]   | -2.9 [-6.0, 0.2]  |
| SIPSO (score)             | 0.8 [-0.7, 2.3]   | 2.7 [0.9, 4.4]    |

PASIPD=physical activity scale for individuals with physical disabilities; SIPSO=subjective index of physical and social outcome

\*N=30 control for the SIPSO



1  
2  
3  
4  
5  
6  
7  
8  
9  
10  
11  
12  
13  
14  
15  
16  
17  
18  
19  
20  
21  
22  
23  
24  
25  
26  
27  
28  
29  
30  
31  
32  
33  
34  
35  
36  
37  
38  
39  
40  
41  
42  
43  
44  
45  
46  
47  
48  
49  
50  
51  
52  
53  
54  
55  
56  
57  
58  
59  
60

# Toronto Perturbation-Based Balance Training

## Program Manual

Program developed and manual written by: Avril Mansfield, Vincent DePaul, Cynthia Danells, Elizabeth Inness, Louis Biasin, Vivien Poon, and Svetlana Knorr

For further information, please contact: [avril.mansfield@uhn.ca](mailto:avril.mansfield@uhn.ca)

1  
2  
3  
4  
5  
6  
7  
8  
9  
10  
11  
12  
13  
14  
15  
16  
17  
18  
19  
20  
21  
22  
23  
24  
25  
26  
27  
28  
29  
30  
31  
32  
33  
34  
35  
36  
37  
38  
39  
40  
41  
42  
43  
44  
45  
46  
47  
48  
49  
50  
51  
52  
53  
54  
55  
56  
57  
58  
59  
60

**Table of contents**

Acknowledgements ..... 2

List of abbreviations ..... 3

Introduction ..... 4

1. Screening and assessment ..... 5

2. Planning the program ..... 10

3. The program ..... 12

4. Perturbation training log ..... 14

5. Task descriptions ..... 44

6. Rating of perceived challenge scale ..... 59

For peer review only

## **ACKNOWLEDGEMENTS**

The program described within this manual was developed by Avril Mansfield, Vince DePaul, Elizabeth Inness, Cynthia Danells, Louis Biasin, Vivien Poon, and Svetlana Knorr, who are research and clinical staff affiliated with the Toronto Rehabilitation Institute (AM, VDP, EI, CD, LB, VP, and SK), Sunnybrook Research Institute (AM), the University of Toronto (AM, EI, CD, LB, VP, and SK), and Queen's University at Kingston (VDP). The work described within this manual is supported by the Canadian Institute of Health Research (MOP-133577 and MSH-141983), the Heart and Stroke Foundation Canadian Partnership for Stroke Recovery, and the Ministry of Research and Innovation. We also acknowledge the support of Toronto Rehabilitation Institute. Equipment and space have been funded with grants from the Canada Foundation for Innovation, Ontario Innovation Trust, and the Ministry of Research and Innovation.

We thank Cynthia Campos, who provided illustrations, and Luigi Bianchi, who agreed to be photographed for the manual.

**LIST OF ABBREVIATIONS**

1  
2  
3  
4 AFO = ankle-foot orthosis  
5 BOS = base of support  
6 BP = blood pressure  
7  
8 CMSA = Chedoke-McMaster Stroke Assessment  
9 DF = dorsiflexion  
10 EV = eversion  
11 HR = heart rate  
12 INV = inversion  
13 Mini-BES = Mini Balance Evaluation Systems (test)  
14 PBT = perturbation-based balance training  
15 PF = plantarflexion  
16 RPC = rating of perceived challenge  
17 TUG = timed-up and go  
18  
19  
20  
21  
22  
23  
24  
25  
26  
27  
28  
29  
30  
31  
32  
33  
34  
35  
36  
37  
38  
39  
40  
41  
42  
43  
44  
45  
46  
47  
48  
49  
50  
51  
52  
53  
54  
55  
56  
57

## **INTRODUCTION**

The **goal of PBT** is to improve reactive balance control in order to optimize safe independent mobility. The program requires that individuals repeatedly experience loss of balance (i.e., internal or manual postural perturbations) and are provided the opportunity to practice stepping reactions to regain balance following this instability. As participants adapt to the challenge and improve their balance control, the challenge should be increased. Challenge can be increased by increasing the magnitude of the manual perturbation, adding more challenging secondary movement and cognitive tasks, removing or altering sensory feedback, and changing the environment.

Note, for convenience and clarity of expression in this document, we use feminine pronouns to refer to the treating physiotherapist, and masculine pronouns to refer to the participant.

For peer review only

## **I. SCREENING AND ASSESSMENT**

### **I.1 An initial assessment is required to inform and guide treatment, and ensure patient safety.**

Information regarding significant medical history is obtained; specifically, does the participant:

- Have arthritis in the lower extremities or any other joint pain;
- Normally wear glasses or contact lenses;
- Normally use a cane, a rollator, or any other mobility aid;
- Normally wear an orthotic (brace) around the ankle and/or knee;
- Normally wear a sling around the arm/shoulder;
- Have diabetes;
- Take any medication on an “as needed” basis (i.e., PRN medication);
- Report any recent falls; and
- Have fear of falling?

Modifications to the manner in which the program is provided may be made based on responses to the questions above. For example, some activities might be avoided to prevent exacerbation of a previous injury.

The initial assessment includes:

- Assessment of reactive stepping using
  - Forward-fall lean-and-release perturbations under two conditions: usual response and encouraged use (5 trials per condition); and
  - Observation of reactions in the ‘Reactive’ component of the mini-Balance Evaluation Systems (mini-BES) test.
- Consideration of some of the contributors to impaired reactive stepping:
  - Stroke severity/stroke symptoms – e.g., using the National Institutes of Health Stroke Scale;
  - Stage of motor recovery – e.g., using the Chedoke McMaster Stroke Assessment (CMSA);
  - Balance confidence – e.g., using the Activity-specific Balance Confidence scale; and
  - Sensation (see Sections 1.4 and 1.5).

### **I.2 Lean and release assessment instructions.**

Control of reactive stepping following a postural perturbation is assessed using a lean-and-release system. Participants wear a safety harness attached to an overhead support system. The harness is also connected at the back to a beam via a quick-release mechanism (i.e., a modified crossbow trigger). The participant must lean forward from the ankles far such that approximately 10% of his body weight supported by the cable. Once achieved, the cable is released creating a forward fall from which the participant needs to recover. He is instructed step as quickly as possible to regain balance and come to stable stance. If he cannot regain stability independently, then the assessor can aid in the recovery and prevent a ‘fall’ (i.e., being caught by the safety harness).

Two conditions are assessed and recorded on the score sheet (see Section 1.3) – the ‘usual response’ and the ‘encouraged use’. The first five trials are completed as described above and the limb that

1  
2 responds first to the release is recorded. This is the **'usual response'**. If the same limb responds  
3  $\geq 4/5$  times, this is considered to be the **'preferred limb'**. In the **'encouraged use'** condition, five  
4 trials are completed with the preferred limb blocked and the participant is instructed to attempt to  
5 react with the non-preferred limb. The blocking is accomplished with the hand or foot of the  
6 physiotherapist/assessor. If it appears that the participant is going to step with the blocked limb, the  
7 hand/foot can be removed quickly, but the participant is not told that the block will be removed. If  
8 there is no obvious preferred limb (i.e., participant stepped 3 times with one leg and 2 with the  
9 other), then the limb that is blocked should alternate 2 times for one limb and 3 for the other.  
10  
11

12 The lean-and-release assessment is video-recorded and the video is reviewed later to observe any  
13 participant-specific impairments in reactive stepping (see also Section 4). While it might be possible to  
14 observe some obvious impairments in 'real time', often the reaction happens so quickly that this is not  
15 possible.  
16  
17

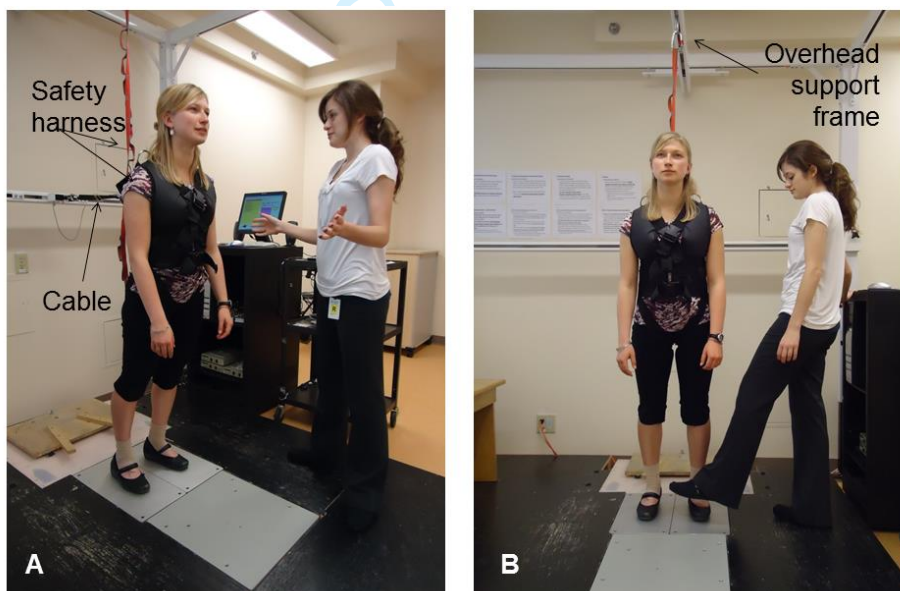

**Figure 1.1: The lean-and-release system.** Panel A (left) shows the usual response condition. Panel B (right) shows the encouraged-use condition. Figure taken from Mansfield et al., BMC Neurol. 2015;15:87

### 1.3 Lean and release collection sheet.

#### Usual response

- Participant wearing harness
- Aim for 10% body weight on the cable
- Random delay between 'ready' signal and perturbation
- Review video to determine preferred limb & assists (if not clear during testing)
- Record limb for first step

| Test | Trial # | Comments | Limb                                                            | Assist                                                      |
|------|---------|----------|-----------------------------------------------------------------|-------------------------------------------------------------|
| 1    |         |          | <input type="checkbox"/> Right<br><input type="checkbox"/> Left | <input type="checkbox"/> No<br><input type="checkbox"/> Yes |
| 2    |         |          | <input type="checkbox"/> Right<br><input type="checkbox"/> Left | <input type="checkbox"/> No<br><input type="checkbox"/> Yes |
| 3    |         |          | <input type="checkbox"/> Right<br><input type="checkbox"/> Left | <input type="checkbox"/> No<br><input type="checkbox"/> Yes |
| 4    |         |          | <input type="checkbox"/> Right<br><input type="checkbox"/> Left | <input type="checkbox"/> No<br><input type="checkbox"/> Yes |
| 5    |         |          | <input type="checkbox"/> Right<br><input type="checkbox"/> Left | <input type="checkbox"/> No<br><input type="checkbox"/> Yes |

Preferred limb (initiated stepping in  $\geq 4/5$  trials with this limb):

- Right
- Left
- No clear preference

#### Encouraged use

- Block preferred limb with researchers hand/foot; if no limb preference do two trials blocking one limb and three blocking the other
- Aim for 10% body weight on the cable
- Random delay between 'ready' signal and perturbation
- Review video to determine preferred limb & assists (if not clear during testing)
- Record limb for first step

| Test | Trial # | Comments | Limb                                                            | Assist                                                      |
|------|---------|----------|-----------------------------------------------------------------|-------------------------------------------------------------|
| 6    |         |          | <input type="checkbox"/> Right<br><input type="checkbox"/> Left | <input type="checkbox"/> No<br><input type="checkbox"/> Yes |
| 7    |         |          | <input type="checkbox"/> Right<br><input type="checkbox"/> Left | <input type="checkbox"/> No<br><input type="checkbox"/> Yes |
| 8    |         |          | <input type="checkbox"/> Right<br><input type="checkbox"/> Left | <input type="checkbox"/> No<br><input type="checkbox"/> Yes |
| 9    |         |          | <input type="checkbox"/> Right<br><input type="checkbox"/> Left | <input type="checkbox"/> No<br><input type="checkbox"/> Yes |
| 10   |         |          | <input type="checkbox"/> Right<br><input type="checkbox"/> Left | <input type="checkbox"/> No<br><input type="checkbox"/> Yes |



#### 1.4 Sensation assessment instructions.

Exteroceptive and proprioceptive sensation are assessed in the affected foot and ankle. It is necessary to know if the participant appreciates light touch and movement of the ankle and foot. If these are absent or decreased, steps should be taken to accommodate the deficits in order to minimize potential injury due to PBT.

Sensation is assessed with the participant sitting on a raised plinth, feet dangling, with shoes and socks removed. Demonstration of the test should be done with the participant's eyes open and administered to the less-affected foot/ankle. The actual test should be administered to the more-affected foot/ankle following the demonstration with the participant's eyes closed.

**Light touch** is assessed using a cotton ball; the cotton ball should lightly touch but not brush the sole of the participant's foot. The foot is touched 5 times and the participant is instructed to respond when the touch is felt. Responses are recorded on the score sheet (see Section 1.5). If there is no response (and you are certain that the participant understood the instructions) this is recorded as a negative response.

The **perception of joint movement** is assessed in the ankle (dorsiflexion and plantar flexion) and in the foot (inversion and eversion). The participant's foot is held in two places: the bony prominences of the first and fifth meta-tarsal phalangeal joints and at the medial and lateral malleoli. Movements of the ankle should be demonstrated on the less-affected side as "up" for dorsiflexion and "down" for plantar flexion and, of the foot, as "in" for inversion and "out" for eversion. Care should be taken not to change the pressure of the hold during the movement. When being tested, movements should be through small ranges and time should be allowed for the participant to respond. If the participant is unsure of the direction of the movement, the range should be increased. If the participant is still unsure, then this is a negative response for the test. Five movements should be tested at the ankle and five at the foot.

Each correct, incorrect, or absent response is recorded on the score sheet (Section 1.5). If the participant scores <4/5 for light touch appreciation, and/or <8/10 for joint movement perception, then consideration is made for use of an Aircast Airport Ankle Brace during training.

## 1.5 Sensation assessment collection sheet.

### Position recognition

| Position       | Correct response?            |
|----------------|------------------------------|
| Dorsiflexion   | <input type="checkbox"/> Yes |
|                | <input type="checkbox"/> No  |
| Plantarflexion | <input type="checkbox"/> Yes |
|                | <input type="checkbox"/> No  |
| Dorsiflexion   | <input type="checkbox"/> Yes |
|                | <input type="checkbox"/> No  |
| Dorsiflexion   | <input type="checkbox"/> Yes |
|                | <input type="checkbox"/> No  |
| Plantarflexion | <input type="checkbox"/> Yes |
|                | <input type="checkbox"/> No  |
| Number correct |                              |

| Position       | Correct response?            |
|----------------|------------------------------|
| Inversion      | <input type="checkbox"/> Yes |
|                | <input type="checkbox"/> No  |
| Eversion       | <input type="checkbox"/> Yes |
|                | <input type="checkbox"/> No  |
| Inversion      | <input type="checkbox"/> Yes |
|                | <input type="checkbox"/> No  |
| Eversion       | <input type="checkbox"/> Yes |
|                | <input type="checkbox"/> No  |
| Eversion       | <input type="checkbox"/> Yes |
|                | <input type="checkbox"/> No  |
| Number correct |                              |

If number correct is <8/10, an AirSport ankle brace should be used to prevent injury during PBT.

### Light touch sensation

| Trial          | Correct response?            |
|----------------|------------------------------|
| Trial 1        | <input type="checkbox"/> Yes |
|                | <input type="checkbox"/> No  |
| Trial 2        | <input type="checkbox"/> Yes |
|                | <input type="checkbox"/> No  |
| Trial 3        | <input type="checkbox"/> Yes |
|                | <input type="checkbox"/> No  |
| Trial 4        | <input type="checkbox"/> Yes |
|                | <input type="checkbox"/> No  |
| Trial 5        | <input type="checkbox"/> Yes |
|                | <input type="checkbox"/> No  |
| Number correct |                              |

If number correct is <4/5, an AirSport ankle brace should be used to prevent injury during PBT.

## **2. PLANNING THE PROGRAM**

### **2.1 The program is individualized to the participant's specific impairments in reactive balance control**

In order to create an effective training program, consideration is made of the participant's unique areas of dyscontrol (identified on initial assessment; see Section 1). Section 4 (Perturbation Training Log) outlines areas of dyscontrol and suggested treatment approaches for each problem. The principle of individual differences considers an individual's response to exercise. Therefore, progression should be gradual and systematic and occur at the individual participant's rate of improvement. Task difficulty is not absolute and could vary from participant-to-participant depending on specific control problems and other deficits.

### **2.2 List of equipment**

The following equipment is required for this specific program:

- Overhead harness support track;
- Fall-arrest approved safety harness;
- Equipment for task-specific activities:
  - Thin foam mat (e.g., thickness of yoga mat or 2.5 cm gym mat);
  - Thick foam pad (dense blue foam);
  - Hand ball (2 sizes; e.g., 10 cm diameter and tennis ball);
  - Soccer ball;
  - Steps (10 cm and 20 cm high);
  - Stop watch;
  - Unstable 'step' (if an unstable step is not available, place a regular step on a thin foam mat);
  - Cross marked out in tape on the floor (2 pieces of tape each at least 60 cm long placed to intersect at right angles (see Figure 6.24);
  - Set of 6 – 23 cm diameter multi-colored Agility Dots;
  - Foam obstacles (e.g., pool noodles or half-round foam rollers); and
- Participant-specific equipment (e.g., walking aid, ankle brace/orthosis, helmet, arm sling).

### **2.3 Ensuring safety during training**

#### **2.3.1 Safety harness**

Participants wear a safety harness attached to an overhead track at all times to prevent a fall to the ground. However, the harness system should be used as a back-up; the supervising physiotherapist still intervenes and provides physical assistance to 'brake the fall' when she feels the individual will not be able to recover balance. (Note, to allow participants the opportunity to practice stepping reactions, the physiotherapist **only** provides hands-on assistance if the participant is unable to regain stability alone.) The harness can prevent a fall to the floor but cannot prevent all possible injuries. Appropriate selection of participants, consideration of their underlying impairments, and appropriate supervision is still required. For example, it is possible that an individual could experience an ankle sprain while stepping in response to a perturbation (see Section 2.3.2). It is also possible that a frail individual who falls completely into the harness will experience an injury (e.g., bruise) because he is caught by the safety harness; a fracture could also be possible with a participant who has very low

1  
2 bone mineral density. Participants should not be left 'dangling' in the safety harness as the straps can  
3 restrict circulation.  
4

### 5 **2.3.2 Protective equipment for ankle**

6  
7 An ankle-foot orthosis (AFO; if prescribed) or an Aircast AirSport Ankle Brace is used during PBT if  
8 the participant meets one or more of the following criteria:  
9

- 10 • Participant typically uses an AFO during home and/or community walking;
- 11 • CMSA foot score is stage 3 or lower;
- 12 • Ankle joint position sense score is <8/10 (see Section 1.4 and 1.5);
- 13 • Light touch sensation of the plantar surface of the foot score is <4/5 (see Section 1.4 and 1.5);
- 14 and/or
- 15 • The treating physiotherapist feels this is necessary to preserve stability of the ankle joint and
- 16 prevent injury.  
17  
18

19 Use of the AirSport Ankle Brace, AFO, or any other assistive devices should be documented in the  
20 Perturbation Training Log (Section 4).  
21  
22

### 23 **2.3.3 Monitoring heart rate and blood pressure**

24  
25 Heart rate (HR) and blood pressure (BP) are taken from the less affected arm using an automatic BP  
26 cuff. The less-affected arm is repositioned in an extended position resting on a table slightly below the  
27 level of the heart. If BP and/or HR fall outside of an 'acceptable' range (systolic BP is outside 90-140  
28 mmHg; diastolic BP is outside 60-90 mmHg; or, HR is outside 60-100 bpm), a second measure is  
29 obtained. If the values continue to be outside of the range, the participant is asked to sit quietly for 5  
30 minutes and perhaps, take a few deep breaths or drink a glass of water, before taking a third  
31 measurement. Participants with HR/BP measurements outside of the acceptable range are also  
32 questioned regarding recent medications (what they have taken and when, or if they have not taken  
33 their usual medications), when they last had something to eat/drink, and if the recently took caffeine,  
34 exercised, or smoked. The decision to continue or terminate the session is made by the  
35 physiotherapist considering factors such as the participants' usual resting HR/BP, how far the  
36 measured values are outside of the acceptable range, the participants' usual medication (e.g., beta-  
37 blockers), and the participants' perception of how they are feeling. If the visit is terminated, the  
38 physiotherapist may advise that the participant follow-up with his primary care physician. If the visit  
39 continues, the physiotherapist may choose to monitor HR and BP regularly throughout the visit and  
40 observe cardiovascular responses to exercise.  
41  
42  
43  
44  
45  
46  
47  
48  
49  
50  
51  
52  
53  
54  
55  
56  
57

### **3. THE PROGRAM**

#### **3.1 Overview**

The PBT program involves 12 1-hour training sessions provided 2 times per week for 6 weeks. Each session is 60 minutes in length and is provided in a one-to-one format. This core program is modified to fit with delivery of in-patient rehabilitation to allow for evaluation among individuals with sub-acute stroke.

Sessions begin with a 10-minute warm-up and end with a 10-minute cool-down following the warm-up and cool-down from the Keep Moving with Stroke program. Each session involves a minimum of ten 'voluntary' tasks that are each practiced for about 2 minutes. Once the participant is comfortable doing the task, the physiotherapist provides a manual perturbation to cause the participant to lose balance with the intent of evoking a reactive step (see Section 3.3). Six external perturbations are provided per task such that there are 60 external perturbations per session; however, fewer perturbations may be performed if participant tolerance is low. Participants might also experience a loss of balance (i.e., internal perturbation) due to failure to properly control balance during the voluntary task. Intensity of the session is determined by participant response; the participant should successfully regain stability with 1 or 2 steps and no assistance from the physiotherapist or safety harness 50% of the time. If the participant is too 'successful', the level of challenge is increased, or vice versa.

#### **3.2 Voluntary Tasks**

Each session involves 'voluntary' tasks that progress along a mobility continuum to evoke internal perturbations (i.e., loss of balance or self-destabilization):

- a) 'Stable' – the voluntary task is to maintain a static base of support;
- b) 'Quasi-mobile' – the voluntary task is to move the feet (e.g., stepping forward with alternate feet); however, the participant remains in place;
- c) 'Mobile' – the voluntary task is to move from one location to another (e.g., walking, side-stepping); and
- d) 'Unpredictably mobile' – the voluntary task is to move from one location to another in an unpredictable manner (e.g., kicking a soccer ball).

The challenge of each voluntary task can be influenced by manipulating other factors, such as:

- a) The sensory condition (e.g., firm to compliant surfaces, eyes open to eyes closed).
- b) The cognitive requirements (e.g. single task to multi-task, counting backwards, moving on cue).
- c) The environment (e.g., walking on even surface to walking over obstacles).

See "Description of Voluntary Tasks" in Section 5 for further information.

#### **3.3 Methods of Perturbation**

**Internal perturbations** are evoked when the participant attempts to perform a task that causes instability. Various voluntary tasks, including rapid 'agility' tasks (e.g., rapid step-ups) are used to evoke internal perturbations. A task that appears as easy as standing with eyes closed may cause an internal perturbation for a participant with poor balance control. However, some participants do not put themselves in situations causing a loss of balance or necessitating a stepping reaction (i.e., they will

perform agility tasks slowly); therefore, external perturbations are also included in every session to ensure a sufficient training dose.

**External perturbations** are caused by a force outside of the participant's control. Small-magnitude external perturbations may be used with participants who have lower functional abilities. It is usually easiest to start with perturbations that cause a fall towards the physiotherapist (i.e., pull or lean-and-release) so that the physiotherapist can control the outcome and alleviate participants' anxiety and facilitate participants' perceptions of safety. There are three methods for evoking external perturbations: 1) lean-and-release (predictable direction/magnitude; 2) push/pull (can be unpredictable in terms of direction and magnitude; or 3) trip during walking (see Section 5 for details).

### 3.4 Measurement

Measures are taken throughout the training to ensure: 1) focus on participant-specific problems; 2) ongoing progression; and 3) participant safety. The Perturbation Training Log (Section 4) is used to document the following:

- Performance on reactive stepping linked to key areas of focus (e.g., if a goal is to reduce frequency of multiple stepping then frequency of multiple stepping should be documented);
- Number of repetitions (i.e., number of times the participant experiences a loss of balance): '0' = balance recovered using 2 steps or fewer; '1' = balance recovered using more than 2 steps; and, 'X' = assistance provided by the safety harness or physiotherapist to recover balance;
- Additional tasks/conditions;
- Number of rest breaks;
- 'Rating of perceived challenge' (RPC) (Section 6);
- HR and/or BP (if indicated);

### 3.5 Format of training session

- 1) Participant arrives.
- 2) HR and BP are taken.
- 3) Warm-up is completed.
- 4) Harness is donned.
- 5) Tasks, as outlined in the Perturbation Training Log (Section 4), are performed for that particular session. Detailed descriptions of each task can be found in Section 5.
- 6) Documentation about and scoring of each task are completed before moving on to the next task.
- 7) Rest is taken as required, or after each task.
- 8) Cool-down and stretching are completed.

**4. PERTURBATION TRAINING LOG**

**Participant ID:** \_\_\_\_\_

**Affected side of body:** \_\_\_\_\_

**Does HR &/or BP need monitoring through session?**    Y    N

**Harness size:** \_\_\_\_\_

**Participant Equipment:**    AFO    AirsSport    Arm Sling    Other

**Participant Goal(s):**

---



---

**Highlights of Assessment Findings:**

CMSA stage ( /7): Leg \_\_\_\_ Foot \_\_\_\_

Position Recognition (#correct/5): DF/PF \_\_\_\_ INV/EV \_\_\_\_

Light touch (#correct/5): \_\_\_\_

Berg balance scale ( /56): \_\_\_\_

Mini-BES - Reactive Postural Control ( /12): \_\_\_\_

TUG (sec): \_\_\_\_

Lean & Release – Preferred trials (#): Right \_\_\_\_ Left \_\_\_\_

Lean & Release – Encouraged use trials (#): Right \_\_\_\_ Left \_\_\_\_

**Comments:**

---



---

Participant ID: \_\_\_\_\_

Date: \_\_\_\_\_

**Treatment planning:**

| Area of dyscontrol                                                                      | Treatment suggestions                                                                                                                                                                                                                                                                                                                                                                                                     | Additional treatment strategies/comments |
|-----------------------------------------------------------------------------------------|---------------------------------------------------------------------------------------------------------------------------------------------------------------------------------------------------------------------------------------------------------------------------------------------------------------------------------------------------------------------------------------------------------------------------|------------------------------------------|
| <input type="checkbox"/> Requires external assist to regain stability                   | <input type="checkbox"/> Start with low-magnitude perturbation, increase magnitude as tolerated<br><input type="checkbox"/> Consider other problems that contribute, like delayed stepping or no stepping                                                                                                                                                                                                                 |                                          |
| <input type="checkbox"/> Does not step when magnitude of perturbation requires a step   | <input type="checkbox"/> Instruct participant to step when s/he feels unstable<br><input type="checkbox"/> Start with low-magnitude perturbations<br><input type="checkbox"/> Start with predictable time/direction of perturbation<br><input type="checkbox"/> Practice the step prior to perturbation<br><input type="checkbox"/> Consider other problems that contribute, like unwillingness to step with paretic limb |                                          |
| <input type="checkbox"/> Has low foot clearance during step: foot 'slides', or shuffles | <input type="checkbox"/> Use obstacles to 'force' a step-over                                                                                                                                                                                                                                                                                                                                                             |                                          |
| <input type="checkbox"/> Demonstrates delayed stepping reaction                         | <input type="checkbox"/> Instruct participant to step as quickly as possible<br><input type="checkbox"/> Start with predictable time/direction of perturbation<br><input type="checkbox"/> If delay is with non-paretic limb, have participant weight-shift to paretic limb prior to perturbation                                                                                                                         |                                          |



| Area of dyscontrol                                                           | Treatment suggestions                                                                                                                                                                                                                                                                                                                                               | Additional treatment strategies/comments |
|------------------------------------------------------------------------------|---------------------------------------------------------------------------------------------------------------------------------------------------------------------------------------------------------------------------------------------------------------------------------------------------------------------------------------------------------------------|------------------------------------------|
| <input type="checkbox"/> Is unwilling to step with paretic limb              | <input type="checkbox"/> Block the non-paretic limb with obstacles, or hand/ foot of physiotherapist<br><input type="checkbox"/> Instruct participant to step with paretic limb<br><input type="checkbox"/> Start with predictable time/direction of perturbation<br><input type="checkbox"/> Time perturbation to coincide with paretic leg/foot being un-weighted |                                          |
| <input type="checkbox"/> Demonstrates multi-step reactions                   | <input type="checkbox"/> Instruct participant to take as few steps as possible<br><input type="checkbox"/> Instruct participant to take long(er) steps                                                                                                                                                                                                              |                                          |
| <input type="checkbox"/> Stands asymmetrically prior to perturbation         | <input type="checkbox"/> Instruct participant to increase loading on the less-loaded limb<br><input type="checkbox"/> Consider using video or feedback of stance symmetry                                                                                                                                                                                           |                                          |
| <input type="checkbox"/> Takes short steps                                   | <input type="checkbox"/> Instruct participant to take longer steps<br><input type="checkbox"/> Step to targets<br><input type="checkbox"/> Step over obstacles                                                                                                                                                                                                      |                                          |
| <input type="checkbox"/> Attempts to use upper extremity to regain stability | <input type="checkbox"/> Physiotherapist should stand as far away as safely possible<br><input type="checkbox"/> Instruct to not use reach-to-grasp reactions<br><input type="checkbox"/> Have participant hold object to prevent grasping                                                                                                                          |                                          |

| Area of dyscontrol                                                                  | Treatment suggestions                                                                                                                                                                                                                                   | Additional treatment strategies/comments |
|-------------------------------------------------------------------------------------|---------------------------------------------------------------------------------------------------------------------------------------------------------------------------------------------------------------------------------------------------------|------------------------------------------|
| <input type="checkbox"/> Falls laterally on step termination                        | <input type="checkbox"/> Instruct participant to take as few steps as possible<br><input type="checkbox"/> Start with low-magnitude perturbation<br><input type="checkbox"/> Try forward/backward perturbations initially with a narrow base of support |                                          |
| <input type="checkbox"/> Uses 'crossover' steps to respond to lateral perturbations | <input type="checkbox"/> Instruct participant to use side-stepping strategy<br><input type="checkbox"/> Place large obstacles in front and behind participant to deter cross-overs                                                                      |                                          |
| <input type="checkbox"/> Is unable to step equally well in all directions           | <input type="checkbox"/> Use multi-directional perturbations<br><input type="checkbox"/> Do more perturbations in the most challenging direction                                                                                                        |                                          |

FOR PEER REVIEW ONLY

1  
2  
3  
4  
5  
6  
7  
8  
9  
10  
11  
12  
13  
14  
15  
16  
17  
18  
19  
20  
21  
22  
23  
24  
25  
26  
27  
28  
29  
30  
31  
32  
33  
34  
35  
36  
37  
38  
39  
40  
41  
42  
43  
44  
45  
46  
47

**'Stable' tasks: session 1**

|                      |            |                       |            |                       |            |
|----------------------|------------|-----------------------|------------|-----------------------|------------|
| <b>Initial - HR:</b> | <b>BP:</b> | <b>Repeat 1 - HR:</b> | <b>BP:</b> | <b>Repeat 2 - HR:</b> | <b>BP:</b> |
|----------------------|------------|-----------------------|------------|-----------------------|------------|

| <b>Voluntary task</b>                                                 | <b>Adaptation to reduce difficulty</b> | <b>Adaptation to increase difficulty</b> | <b>Perturbation</b>                  | <b>Outcome</b><br>(0= $\leq$ 2 steps, 1=multi step, X=loss of balance) | <b>RPC</b> | <b># Rests during task</b> | <b>Rest after task (Y/N)</b> |
|-----------------------------------------------------------------------|----------------------------------------|------------------------------------------|--------------------------------------|------------------------------------------------------------------------|------------|----------------------------|------------------------------|
| Standing still with feet hip-width apart                              | <input type="checkbox"/> Wide BOS      | <input type="checkbox"/> Feet together   | 6 multi-directional lean-and-release |                                                                        |            |                            |                              |
| Standing still with feet hip-width apart, eyes closed                 | <input type="checkbox"/> Wide BOS      | <input type="checkbox"/> Feet together   | 6 multi-directional lean-and-release |                                                                        |            |                            |                              |
| Standing still with feet hip-width apart, on a thin foam mat          | <input type="checkbox"/> Wide BOS      | <input type="checkbox"/> Feet together   | 6 multi-directional lean-and-release |                                                                        |            |                            |                              |
| Standing still with feet hip-width apart, on a thick foam pad         | <input type="checkbox"/> Wide BOS      | <input type="checkbox"/> Feet together   | 6 multi-directional lean-and-release |                                                                        |            |                            |                              |
| Standing still with feet hip-width apart, turning head left and right | <input type="checkbox"/> Wide BOS      | <input type="checkbox"/> Feet together   | 6 multi-directional lean-and-release |                                                                        |            |                            |                              |
| Standing still with feet hip-width apart, looking up and down         | <input type="checkbox"/> Wide BOS      | <input type="checkbox"/> Feet together   | 6 multi-directional lean-and-release |                                                                        |            |                            |                              |
| Standing with feet hip-width apart, counting backwards by 3's         | <input type="checkbox"/> Wide BOS      | <input type="checkbox"/> Feet together   | 6 multi-directional lean-and-release |                                                                        |            |                            |                              |

| Voluntary task                                                                                        | Adaptation to reduce difficulty   | Adaptation to increase difficulty      | Perturbation                         | Outcome<br>(0= $\leq$ 2 steps, I=multi step, X=loss of balance) | RPC | # Rests during task | Rest after task (Y/N) |
|-------------------------------------------------------------------------------------------------------|-----------------------------------|----------------------------------------|--------------------------------------|-----------------------------------------------------------------|-----|---------------------|-----------------------|
| Standing with feet hip-width apart, eyes closed & counting backwards by 3's                           | <input type="checkbox"/> Wide BOS | <input type="checkbox"/> Feet together | 6 multi-directional lean-and-release |                                                                 |     |                     |                       |
| Standing with feet hip-width apart, rapid weight-shifting left and right                              | <input type="checkbox"/> Wide BOS | <input type="checkbox"/> Feet together | 6 multi-directional push/pull        |                                                                 |     |                     |                       |
| Standing with feet hip-width apart, or in stride position, rapid weight-shifting forward and backward | <input type="checkbox"/> Wide BOS | <input type="checkbox"/> Feet together | 6 multi-directional push/pull        |                                                                 |     |                     |                       |
| Standing with feet hip-width apart, throwing & catching a ball                                        | <input type="checkbox"/> Wide BOS | <input type="checkbox"/> Feet together | internal                             |                                                                 |     |                     |                       |
| Standing with feet hip-width apart, rapid arm raises forward and to the sides                         | <input type="checkbox"/> Wide BOS | <input type="checkbox"/> Feet together | internal                             |                                                                 |     |                     |                       |

HR: \_\_\_\_\_ BP: \_\_\_\_\_

Overall rating of perceived challenge: \_\_\_\_\_

|                        |    |  |  |  |  |
|------------------------|----|--|--|--|--|
| <b>TOTALS/AVERAGES</b> | 0= |  |  |  |  |
|                        | I= |  |  |  |  |
|                        | X= |  |  |  |  |

**Overall comments for the session:** \_\_\_\_\_

\_\_\_\_\_

\_\_\_\_\_

\_\_\_\_\_

**'Stable' tasks: Session 2**

|                      |            |                       |            |                       |            |
|----------------------|------------|-----------------------|------------|-----------------------|------------|
| <b>Initial - HR:</b> | <b>BP:</b> | <b>Repeat 1 - HR:</b> | <b>BP:</b> | <b>Repeat 2 - HR:</b> | <b>BP:</b> |
|----------------------|------------|-----------------------|------------|-----------------------|------------|

| <b>Voluntary task</b>                                                       | <b>Adaptation to reduce difficulty</b> | <b>Adaptation to increase difficulty</b> | <b>Perturbation</b>                  | <b>Outcome</b><br>(0= $\leq$ 2 steps, 1=multi step, X=loss of balance) | <b>RPC</b> | <b># Rests during task</b> | <b>Rest after task (Y/N)</b> |
|-----------------------------------------------------------------------------|----------------------------------------|------------------------------------------|--------------------------------------|------------------------------------------------------------------------|------------|----------------------------|------------------------------|
| Standing still with feet hip-width apart                                    | <input type="checkbox"/> Wide BOS      | <input type="checkbox"/> Feet together   | 6 multi-directional lean-and-release |                                                                        |            |                            |                              |
| Standing still with feet hip-width apart, eyes closed                       | <input type="checkbox"/> Wide BOS      | <input type="checkbox"/> Feet together   | 6 multi-directional lean-and-release |                                                                        |            |                            |                              |
| Standing still with feet hip-width apart, on a thin foam mat                | <input type="checkbox"/> Wide BOS      | <input type="checkbox"/> Feet together   | 6 multi-directional lean-and-release |                                                                        |            |                            |                              |
| Standing still with feet hip-width apart, on a thick foam pad               | <input type="checkbox"/> Wide BOS      | <input type="checkbox"/> Feet together   | 6 multi-directional lean-and-release |                                                                        |            |                            |                              |
| Standing still with feet hip-width apart, turning head left and right       | <input type="checkbox"/> Wide BOS      | <input type="checkbox"/> Feet together   | 6 multi-directional lean-and-release |                                                                        |            |                            |                              |
| Standing still with feet hip-width apart, looking up and down               | <input type="checkbox"/> Wide BOS      | <input type="checkbox"/> Feet together   | 6 multi-directional lean-and-release |                                                                        |            |                            |                              |
| Standing with feet hip-width apart, counting backwards by 3's               | <input type="checkbox"/> Wide BOS      | <input type="checkbox"/> Feet together   | 6 multi-directional lean-and-release |                                                                        |            |                            |                              |
| Standing with feet hip-width apart, eyes closed & counting backwards by 3's | <input type="checkbox"/> Wide BOS      | <input type="checkbox"/> Feet together   | 6 multi-directional lean-and-release |                                                                        |            |                            |                              |
| Standing with feet hip-width apart, rapid weight-shifting left and right    | <input type="checkbox"/> Wide BOS      | <input type="checkbox"/> Feet together   | 6 multi-directional push/pull        |                                                                        |            |                            |                              |

| <b>Voluntary task</b>                                                                                 | <b>Adaptation to reduce difficulty</b> | <b>Adaptation to increase difficulty</b> | <b>Perturbation</b>           | <b>Outcome</b><br>(0= $\leq 2$ steps, I=multi step, X=loss of balance) | <b>RPC</b> | <b># Rests During task</b> | <b>Rest After task (Y/N)</b> |
|-------------------------------------------------------------------------------------------------------|----------------------------------------|------------------------------------------|-------------------------------|------------------------------------------------------------------------|------------|----------------------------|------------------------------|
| Standing with feet hip-width apart, or in stride position, rapid weight-shifting forward and backward | <input type="checkbox"/> Wide BOS      | <input type="checkbox"/> Feet together   | 6 multi-directional push/pull |                                                                        |            |                            |                              |
| Standing with feet hip-width apart, throwing & catching a ball                                        | <input type="checkbox"/> Wide BOS      | <input type="checkbox"/> Feet together   | internal                      |                                                                        |            |                            |                              |
| Standing with feet hip-width apart, rapid arm raises forward and to the sides                         | <input type="checkbox"/> Wide BOS      | <input type="checkbox"/> Feet together   | internal                      |                                                                        |            |                            |                              |
| Rapid stepping forward with alternate feet                                                            | <input type="checkbox"/> Short steps   | <input type="checkbox"/> Long steps      | internal                      |                                                                        |            |                            |                              |
| Rapid stepping backward with alternate feet                                                           | <input type="checkbox"/> Short steps   | <input type="checkbox"/> Long steps      | internal                      |                                                                        |            |                            |                              |
| Rapid stepping to the right (right foot)                                                              | <input type="checkbox"/> Short steps   | <input type="checkbox"/> Long steps      | internal                      |                                                                        |            |                            |                              |
| Rapid stepping to the left (left foot)                                                                | <input type="checkbox"/> Short steps   | <input type="checkbox"/> Long steps      | internal                      |                                                                        |            |                            |                              |

HR: \_\_\_\_\_ BP: \_\_\_\_\_

Overall rating of perceived challenge: \_\_\_\_\_

|                        |    |  |  |  |  |
|------------------------|----|--|--|--|--|
| <b>TOTALS/AVERAGES</b> | 0= |  |  |  |  |
|                        | I= |  |  |  |  |
|                        | X= |  |  |  |  |

Overall comments for the session: \_\_\_\_\_  
\_\_\_\_\_  
\_\_\_\_\_

**'Quasi-mobile' tasks: Session 3**

|                      |            |                       |            |                       |            |
|----------------------|------------|-----------------------|------------|-----------------------|------------|
| <b>Initial - HR:</b> | <b>BP:</b> | <b>Repeat 1 - HR:</b> | <b>BP:</b> | <b>Repeat 2 - HR:</b> | <b>BP:</b> |
|----------------------|------------|-----------------------|------------|-----------------------|------------|

| <b>Voluntary task</b>                                           | <b>Adaptation to reduce difficulty</b>                  | <b>Adaptation to increase difficulty</b>                     | <b>Perturbation</b>           | <b>Outcome</b><br>(0= $\leq$ 2 steps, 1=multi step, X=loss of balance) | <b>RPC</b> | <b># Rests during task</b> | <b>Rest after task (Y/N)</b> |
|-----------------------------------------------------------------|---------------------------------------------------------|--------------------------------------------------------------|-------------------------------|------------------------------------------------------------------------|------------|----------------------------|------------------------------|
| Rapid stepping forward with alternate feet                      | <input type="checkbox"/> Short steps                    | <input type="checkbox"/> Long steps                          | 6 multi-directional push/pull |                                                                        |            |                            |                              |
| Rapid stepping backward with alternate feet                     | <input type="checkbox"/> Short steps                    | <input type="checkbox"/> Long steps                          | 6 multi-directional push/pull |                                                                        |            |                            |                              |
| Rapid stepping to alternate sides                               | <input type="checkbox"/> Short steps                    | <input type="checkbox"/> Long steps                          | 6 multi-directional push/pull |                                                                        |            |                            |                              |
| Rapid tap-ups forward with alternate feet                       | <input type="checkbox"/> Low step<br>Step Height: _____ | <input type="checkbox"/> Unstable surface (e.g. soccer ball) | 6 multi-directional push/pull |                                                                        |            |                            |                              |
| Walking in place                                                | <input type="checkbox"/> Feet barely off floor          | <input type="checkbox"/> Knees to hip-height                 | 6 multi-directional push/pull |                                                                        |            |                            |                              |
| Rapid stepping forward with alternate feet, on a thin foam mat  | <input type="checkbox"/> Short steps                    | <input type="checkbox"/> Long steps                          | 6 multi-directional push/pull |                                                                        |            |                            |                              |
| Rapid stepping backward with alternate feet, on a thin foam mat | <input type="checkbox"/> Short steps                    | <input type="checkbox"/> Long steps                          | 6 multi-directional push/pull |                                                                        |            |                            |                              |

| Voluntary task                                                | Adaptation to reduce difficulty                         | Adaptation to increase difficulty                            | Perturbation                  | Outcome<br>(0= $\leq$ 2 steps, 1=multi step, X=loss of balance) | RPC | # Rests during task | Rest after task (Y/N) |
|---------------------------------------------------------------|---------------------------------------------------------|--------------------------------------------------------------|-------------------------------|-----------------------------------------------------------------|-----|---------------------|-----------------------|
| Rapid stepping to alternate sides, on a thin foam mat         | <input type="checkbox"/> Short steps                    | <input type="checkbox"/> Long steps                          | 6 multi-directional push/pull |                                                                 |     |                     |                       |
| Rapid tap-ups forward with alternate feet, on a thin foam mat | <input type="checkbox"/> Low step<br>Step Height: _____ | <input type="checkbox"/> Unstable surface (e.g. soccer ball) | 6 multi-directional push/pull |                                                                 |     |                     |                       |
| Walking in place, on a thin foam mat                          | <input type="checkbox"/> Feet barely off floor          | <input type="checkbox"/> Knees to hip-height                 | 6 multi-directional push/pull |                                                                 |     |                     |                       |

HR: \_\_\_\_\_

BP: \_\_\_\_\_

Overall rating of perceived challenge: \_\_\_\_\_

|                        |    |  |  |  |  |
|------------------------|----|--|--|--|--|
| <b>TOTALS/AVERAGES</b> | 0= |  |  |  |  |
|                        | 1= |  |  |  |  |
|                        | X= |  |  |  |  |

**Overall comments for the session:** \_\_\_\_\_

\_\_\_\_\_

\_\_\_\_\_

\_\_\_\_\_



## 'Quasi-mobile' tasks: Session 4

|                      |            |                       |            |                       |            |
|----------------------|------------|-----------------------|------------|-----------------------|------------|
| <b>Initial - HR:</b> | <b>BP:</b> | <b>Repeat 1 - HR:</b> | <b>BP:</b> | <b>Repeat 2 - HR:</b> | <b>BP:</b> |
|----------------------|------------|-----------------------|------------|-----------------------|------------|

| <b>Voluntary task</b>                                                   | <b>Adaptation to reduce difficulty</b>                  | <b>Adaptation to increase difficulty</b>                     | <b>Perturbation</b>           | <b>Outcome</b><br>(0= $\leq$ 2 steps, 1=multi step, X=loss of balance) | <b>RPC</b> | <b># Rests during task</b> | <b>Rest after task (Y/N)</b> |
|-------------------------------------------------------------------------|---------------------------------------------------------|--------------------------------------------------------------|-------------------------------|------------------------------------------------------------------------|------------|----------------------------|------------------------------|
| Rapid stepping forward and backward with right foot                     | <input type="checkbox"/> Short steps; rest in stance    | <input type="checkbox"/> Long steps                          | 6 multi-directional push/pull |                                                                        |            |                            |                              |
| Rapid stepping forward and backward with left foot                      | <input type="checkbox"/> Short steps; rest in stance    | <input type="checkbox"/> Long steps                          | 6 multi-directional push/pull |                                                                        |            |                            |                              |
| Rapid tap-ups forward with alternate feet                               | <input type="checkbox"/> Low step<br>Step Height: _____ | <input type="checkbox"/> Unstable surface (e.g. soccer ball) | 6 multi-directional push/pull |                                                                        |            |                            |                              |
| Rapid step-ups with alternate feet                                      | <input type="checkbox"/> Low step<br>Step Height: _____ | <input type="checkbox"/> Unstable surface (e.g. dense foam)  | 6 multi-directional push/pull |                                                                        |            |                            |                              |
| Rapid tap-ups to alternate sides                                        | <input type="checkbox"/> Low step<br>Step Height: _____ | <input type="checkbox"/> Unstable surface (e.g. soccer ball) | 6 multi-directional push/pull |                                                                        |            |                            |                              |
| Rapid stepping forward and backward with right foot, on a thin foam mat | <input type="checkbox"/> Short steps; rest in stance    | <input type="checkbox"/> Long steps                          | 6 multi-directional push/pull |                                                                        |            |                            |                              |
| Rapid stepping forward and backward with left foot, on a thin foam mat  | <input type="checkbox"/> Short steps; rest in stance    | <input type="checkbox"/> Long steps                          | 6 multi-directional push/pull |                                                                        |            |                            |                              |

| Voluntary task                                                | Adaptation to reduce difficulty                         | Adaptation to increase difficulty                            | Perturbation                  | Outcome<br>(0= $\leq$ 2 steps, I=multi step, X=loss of balance) | RPC | # Rests during task | Rest after task (Y/N) |
|---------------------------------------------------------------|---------------------------------------------------------|--------------------------------------------------------------|-------------------------------|-----------------------------------------------------------------|-----|---------------------|-----------------------|
| Rapid tap-ups forward with alternate feet, on a thin foam mat | <input type="checkbox"/> Low step<br>Step Height: _____ | <input type="checkbox"/> Unstable surface (e.g. soccer ball) | 6 multi-directional push/pull |                                                                 |     |                     |                       |
| Rapid step-ups with alternate feet, on a thin foam mat        | <input type="checkbox"/> Low step<br>Step Height: _____ | <input type="checkbox"/> Unstable surface (e.g. dense foam)  | 6 multi-directional push/pull |                                                                 |     |                     |                       |
| Rapid tap-ups to alternate sides, on a thin foam mat          | <input type="checkbox"/> Low step<br>Step Height: _____ | <input type="checkbox"/> Unstable surface (e.g. soccer ball) | 6 multi-directional push/pull |                                                                 |     |                     |                       |

HR: \_\_\_\_\_

BP: \_\_\_\_\_

Overall rating of perceived challenge: \_\_\_\_\_

|                        |    |  |  |  |  |
|------------------------|----|--|--|--|--|
| <b>TOTALS/AVERAGES</b> | 0= |  |  |  |  |
|                        | I= |  |  |  |  |
|                        | X= |  |  |  |  |

**Overall comments for the session:** \_\_\_\_\_

\_\_\_\_\_

\_\_\_\_\_

\_\_\_\_\_

**'Quasi-mobile' tasks: Session 5**

|                      |            |                       |            |                       |            |
|----------------------|------------|-----------------------|------------|-----------------------|------------|
| <b>Initial - HR:</b> | <b>BP:</b> | <b>Repeat 1 - HR:</b> | <b>BP:</b> | <b>Repeat 2 - HR:</b> | <b>BP:</b> |
|----------------------|------------|-----------------------|------------|-----------------------|------------|

| <b>Voluntary task</b>                                       | <b>Adaptation to reduce difficulty</b>               | <b>Adaptation to increase difficulty</b>     | <b>Perturbation</b>           | <b>Outcome</b><br>(0= $\leq$ 2 steps, 1=multi step, X=loss of balance) | <b>RPC</b> | <b># Rests during task</b> | <b>Rest after task (Y/N)</b> |
|-------------------------------------------------------------|------------------------------------------------------|----------------------------------------------|-------------------------------|------------------------------------------------------------------------|------------|----------------------------|------------------------------|
| Rapid stepping forward and backward with right foot         | <input type="checkbox"/> Short steps; rest in stance | <input type="checkbox"/> Long steps          | 6 multi-directional push/pull |                                                                        |            |                            |                              |
| Rapid stepping forward and backward with left foot          | <input type="checkbox"/> Short steps; rest in stance | <input type="checkbox"/> Long steps          | 6 multi-directional push/pull |                                                                        |            |                            |                              |
| Rapid stepping to alternate sides                           | <input type="checkbox"/> Short steps                 | <input type="checkbox"/> Long steps          | 6 multi-directional push/pull |                                                                        |            |                            |                              |
| Rapid diagonal forward stepping with alternate feet         | <input type="checkbox"/> Short steps                 | <input type="checkbox"/> Long steps          | 6 multi-directional push/pull |                                                                        |            |                            |                              |
| Walking in place                                            | <input type="checkbox"/> Feet barely off floor       | <input type="checkbox"/> Knees to hip-height | 6 multi-directional push/pull |                                                                        |            |                            |                              |
| Walking in place, eyes closed                               | <input type="checkbox"/> Feet barely off floor       | <input type="checkbox"/> Knees to hip-height | 6 multi-directional push/pull |                                                                        |            |                            |                              |
| Rapid stepping with alternate feet in random cued direction | <input type="checkbox"/> Short steps                 | <input type="checkbox"/> Long steps          | 6 multi-directional push/pull |                                                                        |            |                            |                              |

| <b>Voluntary task</b>                     | <b>Adaptation to reduce difficulty</b>                  | <b>Adaptation to increase difficulty</b>                     | <b>Perturbation</b>           | <b>Outcome</b><br>(0= $\leq$ 2 steps, I=multi step, X=loss of balance) | <b>RPC</b> | <b># Rests during task</b> | <b>Rest after task (Y/N)</b> |
|-------------------------------------------|---------------------------------------------------------|--------------------------------------------------------------|-------------------------------|------------------------------------------------------------------------|------------|----------------------------|------------------------------|
| Rapid step-ups with alternate feet        | <input type="checkbox"/> Low step<br>Step Height: _____ | <input type="checkbox"/> Unstable surface (e.g. dense foam)  | 6 multi-directional push/pull |                                                                        |            |                            |                              |
| Rapid tap-ups forward with alternate feet | <input type="checkbox"/> Low step<br>Step Height: _____ | <input type="checkbox"/> Unstable surface (e.g. soccer ball) | 6 multi-directional push/pull |                                                                        |            |                            |                              |
| Rapid tap-ups to alternate sides          | <input type="checkbox"/> Low step<br>Step Height: _____ | <input type="checkbox"/> Unstable surface (e.g. soccer ball) | 6 multi-directional push/pull |                                                                        |            |                            |                              |

HR: \_\_\_\_\_

BP: \_\_\_\_\_

Overall rating of perceived challenge: \_\_\_\_\_

|                        |    |  |  |  |  |
|------------------------|----|--|--|--|--|
| <b>TOTALS/AVERAGES</b> | 0= |  |  |  |  |
|                        | I= |  |  |  |  |
|                        | X= |  |  |  |  |

**Overall comments for the session:** \_\_\_\_\_

\_\_\_\_\_

\_\_\_\_\_

\_\_\_\_\_

**'Quasi-mobile' tasks: Session 6**

|                      |            |                       |            |                       |            |
|----------------------|------------|-----------------------|------------|-----------------------|------------|
| <b>Initial - HR:</b> | <b>BP:</b> | <b>Repeat 1 - HR:</b> | <b>BP:</b> | <b>Repeat 2 - HR:</b> | <b>BP:</b> |
|----------------------|------------|-----------------------|------------|-----------------------|------------|

| <b>Voluntary task</b>                                       | <b>Adaptation to reduce difficulty</b>         | <b>Adaptation to increase difficulty</b>     | <b>Perturbation</b>           | <b>Outcome</b><br>(0= $\leq$ 2 steps, 1=multi step, X=loss of balance) | <b>RPC</b> | <b># Rests during task</b> | <b>Rest after task (Y/N)</b> |
|-------------------------------------------------------------|------------------------------------------------|----------------------------------------------|-------------------------------|------------------------------------------------------------------------|------------|----------------------------|------------------------------|
| Rapid stepping forward with alternate feet                  | <input type="checkbox"/> Short steps           | <input type="checkbox"/> Long steps          | 6 multi-directional push/pull |                                                                        |            |                            |                              |
| Rapid stepping backward with alternate feet                 | <input type="checkbox"/> Short steps           | <input type="checkbox"/> Long steps          | 6 multi-directional push/pull |                                                                        |            |                            |                              |
| Rapid stepping to alternate sides                           | <input type="checkbox"/> Short steps           | <input type="checkbox"/> Long steps          | 6 multi-directional push/pull |                                                                        |            |                            |                              |
| Walking in place, eyes closed                               | <input type="checkbox"/> Feet barely off floor | <input type="checkbox"/> Knees to hip-height | 6 multi-directional push/pull |                                                                        |            |                            |                              |
| 'Jogging' (or fast walking) in place                        | <input type="checkbox"/> Feet barely off floor | <input type="checkbox"/> Knees to hip-height | 6 multi-directional push/pull |                                                                        |            |                            |                              |
| Rapid diagonal forward stepping with alternate feet         | <input type="checkbox"/> Short steps           | <input type="checkbox"/> Long steps          | 6 multi-directional push/pull |                                                                        |            |                            |                              |
| Rapid stepping with alternate feet in random cued direction | <input type="checkbox"/> Short steps           | <input type="checkbox"/> Long steps          | 6 multi-directional push/pull |                                                                        |            |                            |                              |

| Voluntary task                                                                  | Adaptation to reduce difficulty                | Adaptation to increase difficulty            | Perturbation                  | Outcome<br>(0= $\leq$ 2 steps, I=multi step, X=loss of balance) | RPC | # Rests during task | Rest after task (Y/N) |
|---------------------------------------------------------------------------------|------------------------------------------------|----------------------------------------------|-------------------------------|-----------------------------------------------------------------|-----|---------------------|-----------------------|
| 'jogging' (or fast walking) in place, on a thin foam mat                        | <input type="checkbox"/> Feet barely off floor | <input type="checkbox"/> Knees to hip-height | 6 multi-directional push/pull |                                                                 |     |                     |                       |
| Rapid diagonal forward stepping with alternate feet, on a thin foam mat         | <input type="checkbox"/> Short steps           | <input type="checkbox"/> Long steps          | 6 multi-directional push/pull |                                                                 |     |                     |                       |
| Rapid stepping with alternate feet in random cued direction, on a thin foam mat | <input type="checkbox"/> Short steps           | <input type="checkbox"/> Long steps          | 6 multi-directional push/pull |                                                                 |     |                     |                       |

HR: \_\_\_\_\_ BP: \_\_\_\_\_ Overall rating of perceived challenge: \_\_\_\_\_

|                        |    |  |  |  |  |
|------------------------|----|--|--|--|--|
| <b>TOTALS/AVERAGES</b> | 0= |  |  |  |  |
|                        | I= |  |  |  |  |
|                        | X= |  |  |  |  |

**Overall comments for the session:** \_\_\_\_\_  
 \_\_\_\_\_  
 \_\_\_\_\_  
 \_\_\_\_\_

**'Mobile' tasks: Session 7**

|                      |            |                       |            |                       |            |
|----------------------|------------|-----------------------|------------|-----------------------|------------|
| <b>Initial - HR:</b> | <b>BP:</b> | <b>Repeat 1 - HR:</b> | <b>BP:</b> | <b>Repeat 2 - HR:</b> | <b>BP:</b> |
|----------------------|------------|-----------------------|------------|-----------------------|------------|

| <b>Voluntary task</b>                                                        | <b>Adaptation to reduce difficulty</b>                        | <b>Adaptation to increase difficulty</b>                                | <b>Perturbation</b>           | <b>Outcome</b><br>(0= $\leq$ 2 steps, 1=multi step, X=loss of balance) | <b>RPC</b> | <b># Rests during task</b> | <b>Rest after task (Y/N)</b> |
|------------------------------------------------------------------------------|---------------------------------------------------------------|-------------------------------------------------------------------------|-------------------------------|------------------------------------------------------------------------|------------|----------------------------|------------------------------|
| Walking forward                                                              | <input type="checkbox"/> Short steps; walk slowly             | <input type="checkbox"/> Long steps; traffic light                      | 6 multi-directional push/pull |                                                                        |            |                            |                              |
| Walking forward, turning head left and right                                 | <input type="checkbox"/> Short steps; walk slowly             | <input type="checkbox"/> Long steps; traffic light                      | 6 multi-directional push/pull |                                                                        |            |                            |                              |
| Walking forward, looking up and down                                         | <input type="checkbox"/> Short steps; walk slowly             | <input type="checkbox"/> Long steps; traffic light                      | 6 multi-directional push/pull |                                                                        |            |                            |                              |
| Walking and stepping over obstacles                                          | <input type="checkbox"/> Low/short obstacles<br>Define: _____ | <input type="checkbox"/> High/long obstacles<br>Define: _____           | 6 multi-directional push/pull |                                                                        |            |                            |                              |
| Forward braiding                                                             | <input type="checkbox"/> Walk on the line                     | <input type="checkbox"/> Step further across; long steps; traffic light | 6 multi-directional push/pull |                                                                        |            |                            |                              |
| Side stepping                                                                | <input type="checkbox"/> Short steps                          | <input type="checkbox"/> Long steps                                     | 6 multi-directional push/pull |                                                                        |            |                            |                              |
| Turning on the spot (alternate between turning to the left and to the right) | <input type="checkbox"/> Turn slowly                          | <input type="checkbox"/> Turn quickly                                   | 6 multi-directional push/pull |                                                                        |            |                            |                              |

| <b>Voluntary task</b>                                                                         | <b>Adaptation to reduce difficulty</b> | <b>Adaptation to increase difficulty</b> | <b>Perturbation</b>           | <b>Outcome</b><br>(0= $\leq 2$ steps, I=multi step, X=loss of balance) | <b>RPC</b> | <b># Rests during task</b> | <b>Rest after task (Y/N)</b> |
|-----------------------------------------------------------------------------------------------|----------------------------------------|------------------------------------------|-------------------------------|------------------------------------------------------------------------|------------|----------------------------|------------------------------|
| Turning on the spot with eyes closed (alternate between turning to the left and to the right) | <input type="checkbox"/> Turn slowly   | <input type="checkbox"/> Turn quickly    | 6 multi-directional push/pull |                                                                        |            |                            |                              |
| Turning on the spot, in cued direction                                                        | <input type="checkbox"/> Turn slowly   | <input type="checkbox"/> Turn quickly    | 6 multi-directional push/pull |                                                                        |            |                            |                              |
| Four square stepping                                                                          | <input type="checkbox"/> Short steps   | <input type="checkbox"/> Long steps      | 6 multi-directional push/pull |                                                                        |            |                            |                              |

HR: \_\_\_\_\_ BP: \_\_\_\_\_ Overall rating of perceived challenge: \_\_\_\_\_

|                        |    |  |  |  |  |
|------------------------|----|--|--|--|--|
| <b>TOTALS/AVERAGES</b> | 0= |  |  |  |  |
|                        | I= |  |  |  |  |
|                        | X= |  |  |  |  |

**Overall comments for the session:** \_\_\_\_\_  
 \_\_\_\_\_  
 \_\_\_\_\_  
 \_\_\_\_\_



**'Mobile' tasks: Session 8**

|                      |            |                       |            |                       |            |
|----------------------|------------|-----------------------|------------|-----------------------|------------|
| <b>Initial - HR:</b> | <b>BP:</b> | <b>Repeat 1 - HR:</b> | <b>BP:</b> | <b>Repeat 2 - HR:</b> | <b>BP:</b> |
|----------------------|------------|-----------------------|------------|-----------------------|------------|

| <b>Voluntary task</b>            | <b>Adaptation to reduce difficulty</b>                        | <b>Adaptation to increase difficulty</b>                      | <b>Perturbation</b>           | <b>Outcome</b><br>(0= $\leq$ 2 steps, 1=multi step, X=loss of balance) | <b>RPC</b> | <b># Rests during task</b> | <b>Rest after task (Y/N)</b> |
|----------------------------------|---------------------------------------------------------------|---------------------------------------------------------------|-------------------------------|------------------------------------------------------------------------|------------|----------------------------|------------------------------|
| Walking forward                  | <input type="checkbox"/> Short steps; walk slowly             | <input type="checkbox"/> Long steps; traffic light            | 6 multi-directional push/pull |                                                                        |            |                            |                              |
| Walking backward                 | <input type="checkbox"/> Short steps; walk slowly             | <input type="checkbox"/> Long steps; traffic light            | 6 multi-directional push/pull |                                                                        |            |                            |                              |
| Walking forward with eyes closed | <input type="checkbox"/> Short steps; walk slowly             | <input type="checkbox"/> Long steps; walk quickly             | 6 multi-directional push/pull |                                                                        |            |                            |                              |
| Tandem walking forward           | <input type="checkbox"/> Not heel-toe; steps close to line    | <input type="checkbox"/> Traffic light                        | 6 multi-directional push/pull |                                                                        |            |                            |                              |
| Side stepping                    | <input type="checkbox"/> Short steps                          | <input type="checkbox"/> Long steps                           | 6 multi-directional push/pull |                                                                        |            |                            |                              |
| Sideways braiding                | <input type="checkbox"/> Steps not fully crossed              | <input type="checkbox"/> Traffic light                        | 6 multi-directional push/pull |                                                                        |            |                            |                              |
| Side stepping over obstacles     | <input type="checkbox"/> Low/short obstacles<br>Define: _____ | <input type="checkbox"/> High/long obstacles<br>Define: _____ | 6 multi-directional push/pull |                                                                        |            |                            |                              |

| <b>Voluntary task</b>                                                        | <b>Adaptation to reduce difficulty</b> | <b>Adaptation to increase difficulty</b> | <b>Perturbation</b>           | <b>Outcome</b><br>(0= $\leq$ 2 steps, 1=multi step, X=loss of balance) | <b>RPC</b> | <b># Rests during task</b> | <b>Rest after task (Y/N)</b> |
|------------------------------------------------------------------------------|----------------------------------------|------------------------------------------|-------------------------------|------------------------------------------------------------------------|------------|----------------------------|------------------------------|
| Turning on the spot (alternate between turning to the left and to the right) | <input type="checkbox"/> Turn slowly   | <input type="checkbox"/> Turn quickly    | 6 multi-directional push/pull |                                                                        |            |                            |                              |
| Turning on the spot in cued direction                                        | <input type="checkbox"/> Turn slowly   | <input type="checkbox"/> Turn quickly    | 6 multi-directional push/pull |                                                                        |            |                            |                              |
| Four square stepping                                                         | <input type="checkbox"/> Short steps   | <input type="checkbox"/> Long steps      | 6 multi-directional push/pull |                                                                        |            |                            |                              |

HR: \_\_\_\_\_ BP: \_\_\_\_\_ Overall rating of perceived challenge: \_\_\_\_\_

|                        |    |  |  |  |  |
|------------------------|----|--|--|--|--|
| <b>TOTALS/AVERAGES</b> | 0= |  |  |  |  |
|                        | 1= |  |  |  |  |
|                        | X= |  |  |  |  |

**Overall comments for the session:** \_\_\_\_\_  
 \_\_\_\_\_  
 \_\_\_\_\_  
 \_\_\_\_\_

**'Mobile' Tasks: Session 9**

|                      |            |                       |            |                       |            |
|----------------------|------------|-----------------------|------------|-----------------------|------------|
| <b>Initial - HR:</b> | <b>BP:</b> | <b>Repeat 1 - HR:</b> | <b>BP:</b> | <b>Repeat 2 - HR:</b> | <b>BP:</b> |
|----------------------|------------|-----------------------|------------|-----------------------|------------|

| <b>Voluntary task</b>                   | <b>Adaptation to reduce difficulty</b>                     | <b>Adaptation to increase difficulty</b>           | <b>Perturbation</b>           | <b>Outcome</b><br>(0= $\leq$ 2 steps, 1=multi step, X=loss of balance) | <b>RPC</b> | <b># Rests during task</b> | <b>Rest after task (Y/N)</b> |
|-----------------------------------------|------------------------------------------------------------|----------------------------------------------------|-------------------------------|------------------------------------------------------------------------|------------|----------------------------|------------------------------|
| Walking forward on a thin foam mat      | <input type="checkbox"/> Short steps; walk slowly          | <input type="checkbox"/> Long steps; traffic light | 6 multi-directional push/pull |                                                                        |            |                            |                              |
| Walking backward on a thin foam mat     | <input type="checkbox"/> Short steps; walk slowly          | <input type="checkbox"/> Long steps; traffic light | 6 multi-directional push/pull |                                                                        |            |                            |                              |
| Side stepping on a thin foam mat        | <input type="checkbox"/> Short steps                       | <input type="checkbox"/> Long steps                | 6 multi-directional push/pull |                                                                        |            |                            |                              |
| Four square stepping on a thin foam mat | <input type="checkbox"/> Short steps                       | <input type="checkbox"/> Long steps                | 6 multi-directional push/pull |                                                                        |            |                            |                              |
| Tandem walking forward                  | <input type="checkbox"/> Not heel-toe; steps close to line | <input type="checkbox"/> Traffic light             | 6 multi-directional push/pull |                                                                        |            |                            |                              |
| Tandem walking backward                 | <input type="checkbox"/> Not heel-toe; steps close to line | <input type="checkbox"/> Traffic light             | 6 multi-directional push/pull |                                                                        |            |                            |                              |
| Sideways braiding                       | <input type="checkbox"/> Steps not fully crossed           | <input type="checkbox"/> Traffic light             | 6 multi-directional push/pull |                                                                        |            |                            |                              |

| Voluntary task                                                                                | Adaptation to reduce difficulty                   | Adaptation to increase difficulty                                       | Perturbation                  | Outcome<br>(0= $\leq$ 2 steps, I=multi step, X=loss of balance) | RPC | # Rests during task | Rest after task (Y/N) |
|-----------------------------------------------------------------------------------------------|---------------------------------------------------|-------------------------------------------------------------------------|-------------------------------|-----------------------------------------------------------------|-----|---------------------|-----------------------|
| Turning on the spot with eyes closed (alternate between turning to the left and to the right) | <input type="checkbox"/> Turn slowly              | <input type="checkbox"/> Turn quickly                                   | 6 multi-directional push/pull |                                                                 |     |                     |                       |
| Forward braiding                                                                              | <input type="checkbox"/> Walk on the line         | <input type="checkbox"/> Step further across; long steps; traffic light | 6 multi-directional push/pull |                                                                 |     |                     |                       |
| Walking forward with eyes closed                                                              | <input type="checkbox"/> Short steps; walk slowly | <input type="checkbox"/> Long steps; walk quickly                       | 6 multi-directional push/pull |                                                                 |     |                     |                       |

HR: \_\_\_\_\_ BP: \_\_\_\_\_ Overall rating of perceived challenge: \_\_\_\_\_

|                        |    |  |  |  |  |
|------------------------|----|--|--|--|--|
| <b>TOTALS/AVERAGES</b> | 0= |  |  |  |  |
|                        | 1= |  |  |  |  |
|                        | X= |  |  |  |  |

**Overall comments for the session:** \_\_\_\_\_  
 \_\_\_\_\_  
 \_\_\_\_\_  
 \_\_\_\_\_

**'Mobile' tasks: Session 10**

|                      |            |                       |            |                       |            |
|----------------------|------------|-----------------------|------------|-----------------------|------------|
| <b>Initial - HR:</b> | <b>BP:</b> | <b>Repeat 1 - HR:</b> | <b>BP:</b> | <b>Repeat 2 - HR:</b> | <b>BP:</b> |
|----------------------|------------|-----------------------|------------|-----------------------|------------|

| <b>Voluntary task</b>                      | <b>Adaptation to reduce difficulty</b>                     | <b>Adaptation to increase difficulty</b>                                | <b>Perturbation</b>           | <b>Outcome</b><br>(0= $\leq$ 2 steps, 1=multi step, X=loss of balance) | <b>RPC</b> | <b># Rests during task</b> | <b>Rest after task (Y/N)</b> |
|--------------------------------------------|------------------------------------------------------------|-------------------------------------------------------------------------|-------------------------------|------------------------------------------------------------------------|------------|----------------------------|------------------------------|
| Tandem walking forward                     | <input type="checkbox"/> Not heel-toe; steps close to line | <input type="checkbox"/> Traffic light                                  | 6 multi-directional push/pull |                                                                        |            |                            |                              |
| Tandem walking backward                    | <input type="checkbox"/> Not heel-toe; steps close to line | <input type="checkbox"/> Traffic light                                  | 6 multi-directional push/pull |                                                                        |            |                            |                              |
| Forward braiding                           | <input type="checkbox"/> Walk on the line                  | <input type="checkbox"/> Step further across; long steps; traffic light | 6 multi-directional push/pull |                                                                        |            |                            |                              |
| Backward braiding                          | <input type="checkbox"/> Walk on the line                  | <input type="checkbox"/> Step further across; long steps; traffic light | 6 multi-directional push/pull |                                                                        |            |                            |                              |
| Tandem walking forward on a thin foam mat  | <input type="checkbox"/> Not heel-toe; steps close to line | <input type="checkbox"/> Traffic light                                  | 6 multi-directional push/pull |                                                                        |            |                            |                              |
| Tandem walking backward on a thin foam mat | <input type="checkbox"/> Not heel-toe; steps close to line | <input type="checkbox"/> Traffic light                                  | 6 multi-directional push/pull |                                                                        |            |                            |                              |
| Forward braiding on a thin foam mat        | <input type="checkbox"/> Walk on the line                  | <input type="checkbox"/> Step further across; long steps; traffic light | 6 multi-directional push/pull |                                                                        |            |                            |                              |

| Voluntary task                                         | Adaptation to reduce difficulty                  | Adaptation to increase difficulty                                       | Perturbation                  | Outcome<br>(0= $\leq$ 2 steps, I=multi step, X=loss of balance) | RPC | # Rests during task | Rest after task (Y/N) |
|--------------------------------------------------------|--------------------------------------------------|-------------------------------------------------------------------------|-------------------------------|-----------------------------------------------------------------|-----|---------------------|-----------------------|
| Backward braiding on a thin foam mat                   | <input type="checkbox"/> Walk on the line        | <input type="checkbox"/> Step further across; long steps; traffic light | 6 multi-directional push/pull |                                                                 |     |                     |                       |
| Sideways braiding on a thin foam mat                   | <input type="checkbox"/> Steps not fully crossed | <input type="checkbox"/> Traffic light                                  | 6 multi-directional push/pull |                                                                 |     |                     |                       |
| Turning on the spot with eyes closed in cued direction | <input type="checkbox"/> Turn slowly             | <input type="checkbox"/> Turn quickly                                   | 6 multi-directional push/pull |                                                                 |     |                     |                       |

HR: \_\_\_\_\_ BP: \_\_\_\_\_ Overall rating of perceived challenge: \_\_\_\_\_

|                        |    |  |  |  |  |
|------------------------|----|--|--|--|--|
| <b>TOTALS/AVERAGES</b> | 0= |  |  |  |  |
|                        | 1= |  |  |  |  |
|                        | X= |  |  |  |  |

Overall comments for the session: \_\_\_\_\_  
 \_\_\_\_\_  
 \_\_\_\_\_  
 \_\_\_\_\_

**'Mobile & Unpredictable' Tasks: Session 11**

|                      |            |                       |            |                       |            |
|----------------------|------------|-----------------------|------------|-----------------------|------------|
| <b>Initial - HR:</b> | <b>BP:</b> | <b>Repeat 1 - HR:</b> | <b>BP:</b> | <b>Repeat 2 - HR:</b> | <b>BP:</b> |
|----------------------|------------|-----------------------|------------|-----------------------|------------|

| <b>Voluntary task</b>                                          | <b>Adaptation to reduce difficulty</b> | <b>Adaptation to increase difficulty</b>                                               | <b>Perturbation</b>                                           | <b>Outcome</b><br>(0= $\leq 2$ steps, 1=multi step, X=loss of balance) | <b>RPC</b> | <b># Rests during task</b> | <b>Rest after task (Y/N)</b> |
|----------------------------------------------------------------|----------------------------------------|----------------------------------------------------------------------------------------|---------------------------------------------------------------|------------------------------------------------------------------------|------------|----------------------------|------------------------------|
| Kicking soccer ball against wall                               | [none]                                 | <input type="checkbox"/> Stand further from wall; kick outside BOS; kick with each leg | 6 perturbations: PT attempts to take ball, nudges participant |                                                                        |            |                            |                              |
| Throwing hand ball against a wall                              | <input type="checkbox"/> Large ball    | <input type="checkbox"/> Small ball; stand further from wall; throw with each arm      | 6 perturbations: PT attempts to take ball, nudges participant |                                                                        |            |                            |                              |
| Kicking soccer ball against wall, standing on a thin foam mat  | [none]                                 | <input type="checkbox"/> Stand further from wall; kick outside BOS; kick with each leg | 6 perturbations: PT attempts to take ball, nudges participant |                                                                        |            |                            |                              |
| Throwing hand ball against a wall, standing on a thin foam mat | <input type="checkbox"/> Large ball    | <input type="checkbox"/> Small ball; stand further from wall; throw with each arm      | 6 perturbations: PT attempts to take ball, nudges participant |                                                                        |            |                            |                              |
| Walking with sudden stops and changes in direction             | <input type="checkbox"/> Walk slowly   | <input type="checkbox"/> Walk quickly                                                  | 6 multi-directional push/pull/trip                            |                                                                        |            |                            |                              |
| Move to different corners of the room                          | <input type="checkbox"/> Walk slowly   | <input type="checkbox"/> Walk quickly                                                  | 6 multi-directional push/pull/trip                            |                                                                        |            |                            |                              |

| Voluntary task                                                                | Adaptation to reduce difficulty                    | Adaptation to increase difficulty                    | Perturbation                        | Outcome<br>(0= $\leq$ 2 steps, I=multi step, X=loss of balance) | RPC | # Rests during task | Rest after task (Y/N) |
|-------------------------------------------------------------------------------|----------------------------------------------------|------------------------------------------------------|-------------------------------------|-----------------------------------------------------------------|-----|---------------------|-----------------------|
| Walking with sudden stops and changes in direction, obstacles around the room | <input type="checkbox"/> Walk slowly               | <input type="checkbox"/> Walk quickly                | 6 multi-directional push/pull/trip  |                                                                 |     |                     |                       |
| Move to different corners of the room, obstacles around the room              | <input type="checkbox"/> Walk slowly               | <input type="checkbox"/> Walk quickly                | 6 multi-directional push/pull/trip  |                                                                 |     |                     |                       |
| Four square stepping to unpredictable cued direction                          | <input type="checkbox"/> Short steps               | <input type="checkbox"/> Long steps                  | 12 multi-directional push/pull/trip |                                                                 |     |                     |                       |
| 'Dodgeball'                                                                   | <input type="checkbox"/> Ball thrown at upper body | <input type="checkbox"/> Ball thrown rapidly at feet | internal                            |                                                                 |     |                     |                       |

HR: \_\_\_\_\_ BP: \_\_\_\_\_

Overall rating of perceived challenge: \_\_\_\_\_

|                        |    |  |  |  |  |
|------------------------|----|--|--|--|--|
| <b>TOTALS/AVERAGES</b> | 0= |  |  |  |  |
|                        | I= |  |  |  |  |
|                        | X= |  |  |  |  |

Overall comments for the session: \_\_\_\_\_

\_\_\_\_\_

\_\_\_\_\_

\_\_\_\_\_



**'Mobile & unpredictable' tasks: Session 12**

|                      |            |                       |            |                       |            |
|----------------------|------------|-----------------------|------------|-----------------------|------------|
| <b>Initial - HR:</b> | <b>BP:</b> | <b>Repeat 1 - HR:</b> | <b>BP:</b> | <b>Repeat 2 - HR:</b> | <b>BP:</b> |
|----------------------|------------|-----------------------|------------|-----------------------|------------|

| <b>Voluntary task</b>                                                         | <b>Adaptation to reduce difficulty</b>               | <b>Adaptation to increase difficulty</b>               | <b>Perturbation</b>                 | <b>Outcome</b><br>(0= $\leq 2$ steps, 1=multi step, X=loss of balance) | <b>RPC</b> | <b># Rests during task</b> | <b>Rest after task (Y/N)</b> |
|-------------------------------------------------------------------------------|------------------------------------------------------|--------------------------------------------------------|-------------------------------------|------------------------------------------------------------------------|------------|----------------------------|------------------------------|
| Kicking soccer ball back and forth with physiotherapist                       | <input type="checkbox"/> Within reach; kicked slowly | <input type="checkbox"/> Step to reach; kicked quickly | internal                            |                                                                        |            |                            |                              |
| Throwing ball back and forth with physiotherapist                             | <input type="checkbox"/> Large ball; within reach    | <input type="checkbox"/> Small ball; step to reach     | internal                            |                                                                        |            |                            |                              |
| Kicking soccer ball with physiotherapist, standing on a thin foam mat         | <input type="checkbox"/> Within reach; kicked slowly | <input type="checkbox"/> Step to reach; kicked quickly | internal                            |                                                                        |            |                            |                              |
| Throwing ball with physiotherapist, standing on a thin foam mat               | <input type="checkbox"/> Large ball; within reach    | <input type="checkbox"/> Small ball; step to reach     | internal                            |                                                                        |            |                            |                              |
| Walking with sudden stops and changes in direction                            | <input type="checkbox"/> Walk slowly                 | <input type="checkbox"/> Walk quickly                  | 12 multi-directional push/pull/trip |                                                                        |            |                            |                              |
| Move to different corners of the room                                         | <input type="checkbox"/> Walk slowly                 | <input type="checkbox"/> Walk quickly                  | 12 multi-directional push/pull/trip |                                                                        |            |                            |                              |
| Walking with sudden stops and changes in direction, obstacles around the room | <input type="checkbox"/> Walk slowly                 | <input type="checkbox"/> Walk quickly                  | 12 multi-directional push/pull/trip |                                                                        |            |                            |                              |

| Voluntary task                                                   | Adaptation to reduce difficulty                    | Adaptation to increase difficulty                    | Perturbation                        | Outcome<br>(0= $\leq$ 2 steps, 1=multi step, X=loss of balance) | RPC | # Rests during task | Rest after task (Y/N) |
|------------------------------------------------------------------|----------------------------------------------------|------------------------------------------------------|-------------------------------------|-----------------------------------------------------------------|-----|---------------------|-----------------------|
| Move to different corners of the room, obstacles around the room | <input type="checkbox"/> Walk slowly               | <input type="checkbox"/> Walk quickly                | 12 multi-directional push/pull/trip |                                                                 |     |                     |                       |
| Four square stepping to unpredictable cued direction             | <input type="checkbox"/> Short steps               | <input type="checkbox"/> Long steps                  | 12 multi-directional push/pull/trip |                                                                 |     |                     |                       |
| 'Dodgeball'                                                      | <input type="checkbox"/> Ball thrown at upper body | <input type="checkbox"/> Ball thrown rapidly at feet | internal                            |                                                                 |     |                     |                       |

HR: \_\_\_\_\_ BP: \_\_\_\_\_ Overall rating of perceived challenge: \_\_\_\_\_

|                        |    |  |  |  |  |
|------------------------|----|--|--|--|--|
| <b>TOTALS/AVERAGES</b> | 0= |  |  |  |  |
|                        | 1= |  |  |  |  |
|                        | X= |  |  |  |  |

**Overall comments for the session:** \_\_\_\_\_  
 \_\_\_\_\_  
 \_\_\_\_\_  
 \_\_\_\_\_

**Booster sessions**

|                      |            |                       |            |                       |            |
|----------------------|------------|-----------------------|------------|-----------------------|------------|
| <b>Initial - HR:</b> | <b>BP:</b> | <b>Repeat 1 - HR:</b> | <b>BP:</b> | <b>Repeat 2 - HR:</b> | <b>BP:</b> |
|----------------------|------------|-----------------------|------------|-----------------------|------------|

| <b>Voluntary task</b>                                       | <b>Adaptation to reduce difficulty</b>                 | <b>Adaptation to increase difficulty</b>                     | <b>Perturbation</b>                  | <b>Outcome</b><br>(0= $\leq 2$ steps, 1=multi step, X=loss of balance) | <b>RPC</b> | <b># Rests during task</b> | <b>Rest after task (Y/N)</b> |
|-------------------------------------------------------------|--------------------------------------------------------|--------------------------------------------------------------|--------------------------------------|------------------------------------------------------------------------|------------|----------------------------|------------------------------|
| Standing still with feet hip-width apart, eyes closed       | <input type="checkbox"/> Wide base of support          | <input type="checkbox"/> Feet together                       | 6 multi-directional lean-and-release |                                                                        |            |                            |                              |
| Rapid tap-ups forward with alternate feet                   | <input type="checkbox"/> Low step<br>Step Height: ____ | <input type="checkbox"/> Unstable surface (e.g. soccer ball) | 6 multi-directional push/pull        |                                                                        |            |                            |                              |
| Rapid tap-ups to alternate sides                            | <input type="checkbox"/> Low step<br>Step Height: ____ | <input type="checkbox"/> Unstable surface (e.g. soccer ball) | 6 multi-directional push/pull        |                                                                        |            |                            |                              |
| Rapid stepping with alternate feet in random cued direction | <input type="checkbox"/> Short steps                   | <input type="checkbox"/> Long steps                          | 6 multi-directional push/pull        |                                                                        |            |                            |                              |
| Turning on the spot, in cued direction                      | <input type="checkbox"/> Turn slowly                   | <input type="checkbox"/> Turn quickly; eyes closed           | 6 multi-directional push/pull        |                                                                        |            |                            |                              |
| Side stepping/braiding                                      | <input type="checkbox"/> Short steps                   | <input type="checkbox"/> Long steps; thin foam mat           | 6 multi-directional push/pull/trip   |                                                                        |            |                            |                              |
| Forward tandem/braiding                                     | <input type="checkbox"/> Steps close to line           | <input type="checkbox"/> Long steps; thin foam mat           | 6 multi-directional push/pull/trip   |                                                                        |            |                            |                              |

| Voluntary task                                                                | Adaptation to reduce difficulty              | Adaptation to increase difficulty                           | Perturbation                                                  | Outcome<br>(0= $\leq$ 2 steps, 1=multi step, X=loss of balance) | RPC | # Rests during task | Rest after task (Y/N) |
|-------------------------------------------------------------------------------|----------------------------------------------|-------------------------------------------------------------|---------------------------------------------------------------|-----------------------------------------------------------------|-----|---------------------|-----------------------|
| Backward tandem/braiding                                                      | <input type="checkbox"/> Steps close to line | <input type="checkbox"/> Long steps; thin foam mat          | 6 multi-directional push/pull/trip                            |                                                                 |     |                     |                       |
| Walking with sudden stops and changes in direction, obstacles around the room | <input type="checkbox"/> Walk slowly         | <input type="checkbox"/> Walk quickly                       | 6 multi-directional push/pull/trip                            |                                                                 |     |                     |                       |
| Kicking soccer ball against wall                                              | [none]                                       | <input type="checkbox"/> Kick outside BOS; on thin foam mat | 6 perturbations: PT attempts to take ball, nudges participant |                                                                 |     |                     |                       |

HR: \_\_\_\_\_ BP: \_\_\_\_\_ Overall rating of perceived challenge: \_\_\_\_\_

|                        |    |  |  |  |  |
|------------------------|----|--|--|--|--|
| <b>TOTALS/AVERAGES</b> | 0= |  |  |  |  |
|                        | 1= |  |  |  |  |
|                        | X= |  |  |  |  |

**Overall comments for the session:** \_\_\_\_\_  
 \_\_\_\_\_  
 \_\_\_\_\_  
 \_\_\_\_\_

## 5. TASK DESCRIPTIONS

### Types of external perturbations

#### 1) Lean and release

**a. Forward-directed lean-and-release perturbation.** The participant stands facing the physiotherapist, leaning forward with some of his body weight supported by the physiotherapist. He should be leaning far enough forward that his shoulders and hips are ahead of his toes; however, smaller lean angles can be used with more impaired individuals. The physiotherapist's hands are on the participants' shoulders. At an unexpected time, the physiotherapist releases her hands and the participant starts to fall forward, requiring a step to regain stability. The goal is for the participant to take as few steps as possible to recover.

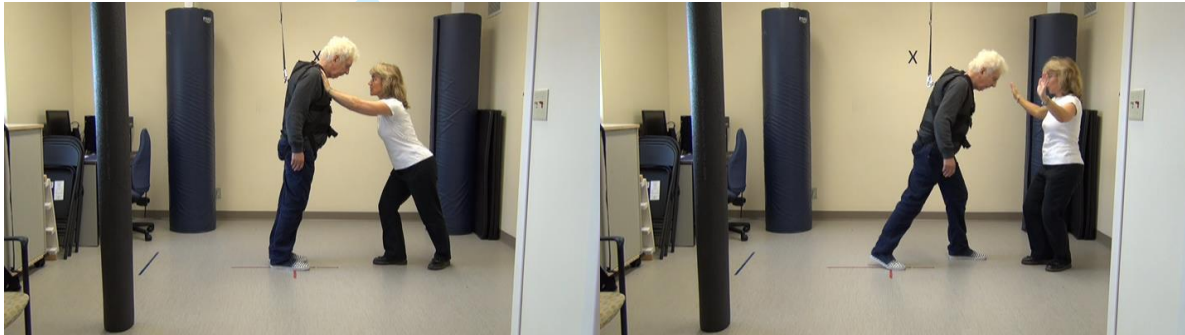

**Figure 6.1. Forward-directed lean-and-release perturbation.** The participant leans forward and the physiotherapist supports his weight (left). The physiotherapist releases her support and the participant steps to recover his balance (right).

**b. Backward-directed lean-and-release perturbation.** The participant stands in front of and facing away from the physiotherapist, leaning backward with some of his body weight supported by the physiotherapist. He should be leaning far enough backward that his shoulders and hips are behind his heels; however, smaller lean angles can be used with more impaired individuals. The physiotherapist's hands are on the participants' shoulders. At an unexpected time, the physiotherapist releases her hands and the participant starts to fall backward, requiring a step to regain stability. The goal is for the participant to take as few steps as possible to recover upright standing balance.

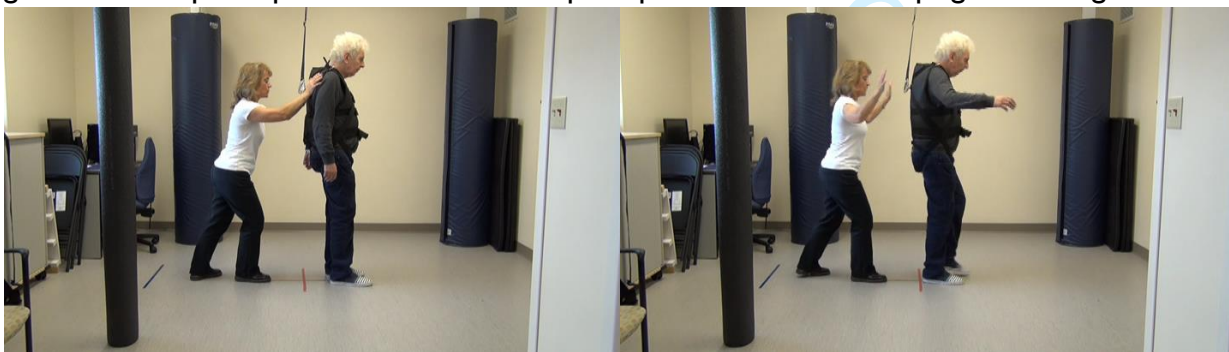

**Figure 6.2. Backward-directed lean-and-release perturbation.** The participant leans backward and the physiotherapist supports his weight (left). The physiotherapist releases her support and the participant steps to recover his balance (right).

**c. Lateral-directed lean-and-release perturbation.** The participant stands with his feet close together, leaning to the right (or left) with some of his body weight supported by the physiotherapist's hands. He should be leaning far enough to the right (or left) that the midline of the pelvis is aligned over the right (or left) foot; however, smaller lean angles can be used with more impaired individuals. The physiotherapist's hands are on the participant's right (or left) shoulder and

1  
2 right (or left) hip. At an unexpected time, the physiotherapist releases her hands and the participant  
3 starts to fall to the right (or left), requiring a step to regain stability. The goal is for the participant to  
4 take as few steps as possible to recover balance.  
5

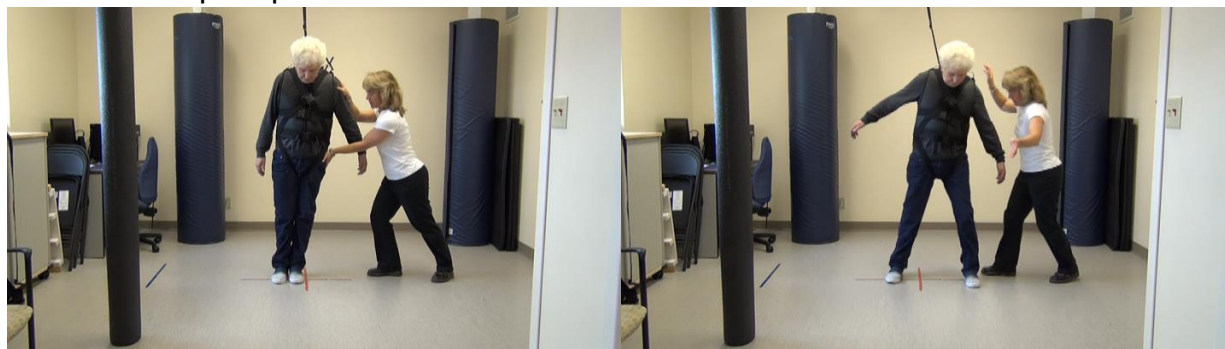

16 **Figure 6.3. Backward-directed lean-and-release perturbation.** The participant leans to the left and the  
17 physiotherapist supports his weight (left). The physiotherapist releases her support and the participant steps to recover  
18 his balance (right).  
19

20  
21 **2) Multi-directional push/pull/trip**

22  
23 **a. Multidirectional push.** The physiotherapist places her hands on the participant's hips or  
24 shoulders and pushes him forward, requiring a reactive step to regain stability. Alternatively, one of  
25 the physiotherapist's hands could be on the hip and the other on the shoulder; a push forward at the  
26 level of one scapula would facilitate a diagonal reactive step. In all scenarios, the physiotherapist  
27 should be ready to assist with the recovery, if necessary, by having a light hold of the safety harness.  
28 The physiotherapist should only provide assistance if the participant is unable to regain stability  
29 independently; this is true with every reaction. Note that backward-directed pushes are not  
30 performed.  
31

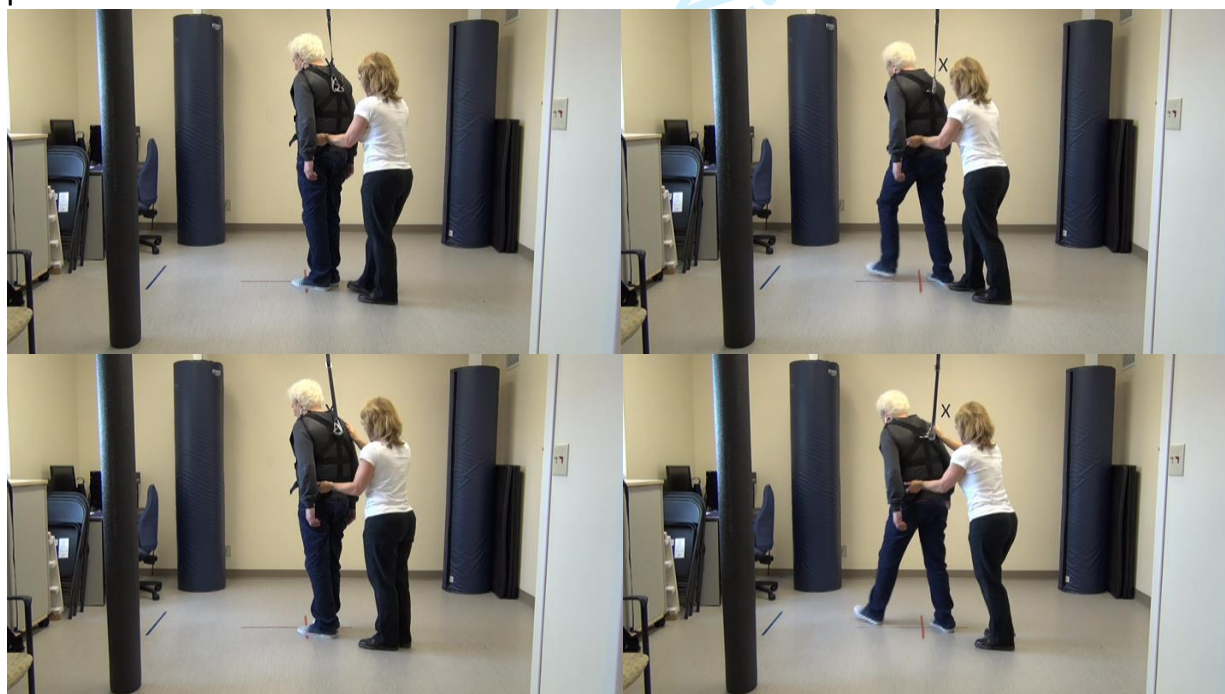

53 **Figure 6.4. Forward-directed push perturbation.** The physiotherapists' hands may be placed at the hips (top images)  
54 or with one hand on the hips and one on the shoulders.  
55  
56  
57  
58



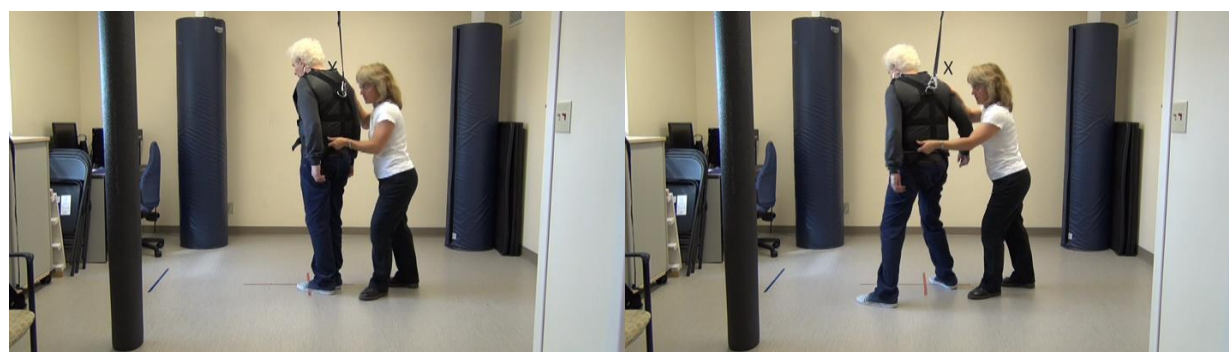

13 **Figure 6.5. Lateral-directed push perturbation.** The physiotherapist places her hands on the participant's right (or  
14 left) hip or shoulder and pushes him to the left (or right), requiring a reactive step to regain stability.

15  
16 **b. Multi-directional pull perturbation.** The physiotherapist may pull the participant's shoulders or  
17 pull on the harness to cause the participant to start to fall forward, requiring a reactive step to regain  
18 stability.

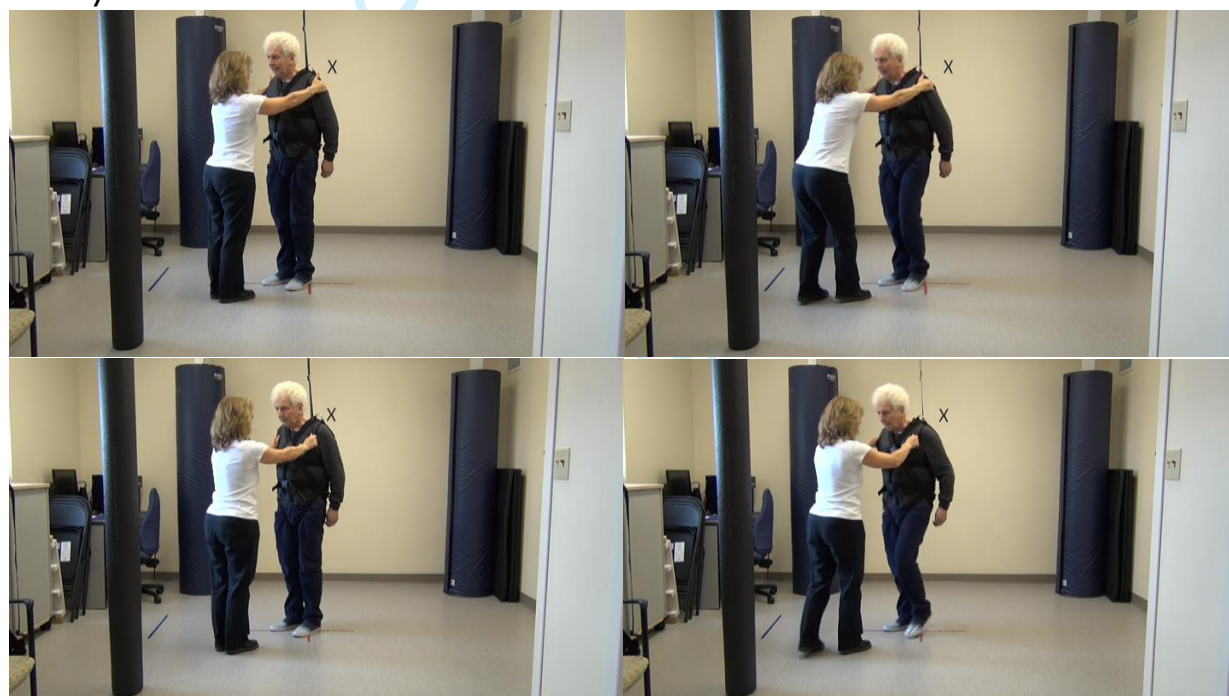

41 **Figure 6.6. Forward-directed pull perturbation.** The physiotherapist places her hands on the participant's shoulders  
42 (top) or pulls on the harness (bottom).

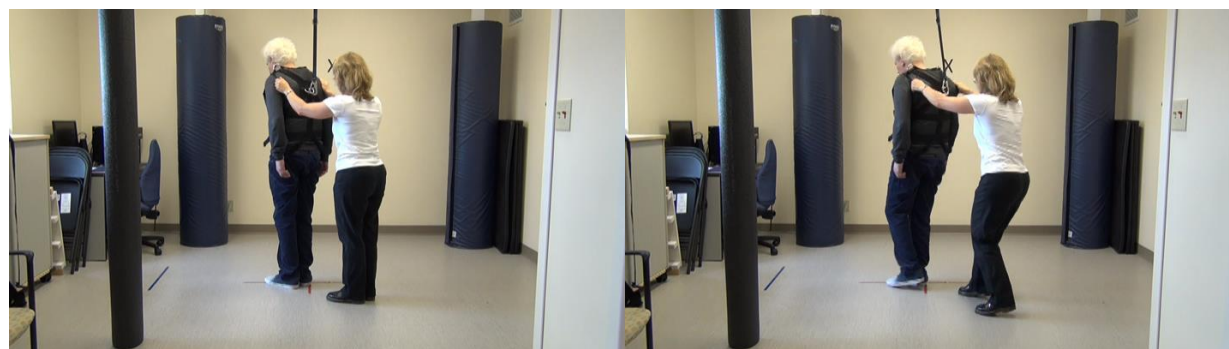

55 **Figure 6.7. Backward-directed pull perturbation.** The physiotherapist uses the shoulders, hips, or harness to pull  
56 the participant backward, requiring a reactive step to regain stability.

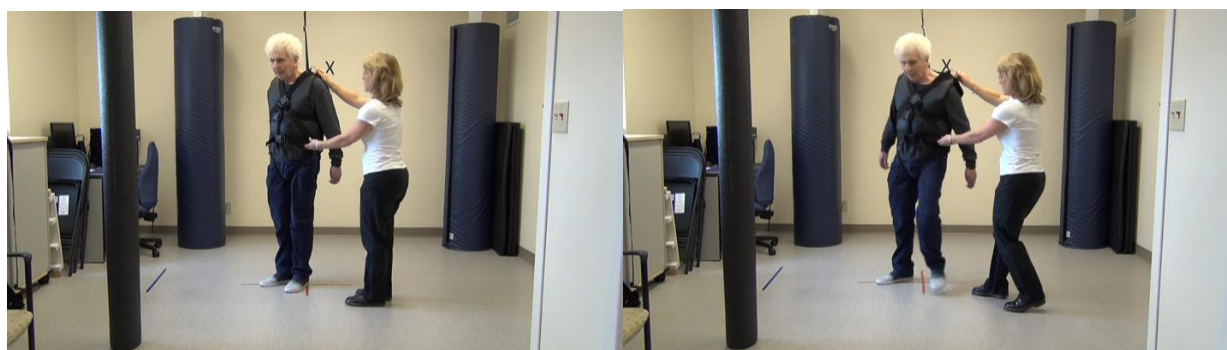

**Figure 6.8. Lateral-directed pull perturbation.** The physiotherapist uses the shoulders, hips or harness, to pull the participant to the right (or left), requiring a reactive step to regain stability.

**c. Trip perturbation while walking.** As the participant walks (forward, backward, sideways), the physiotherapist places her foot in the path of the swing limb causing a trip. A reactive step is required to regain stability. A second person is recommended in this scenario as it is difficult for the physiotherapist doing the tripping to be in a place to provide support should it be needed.

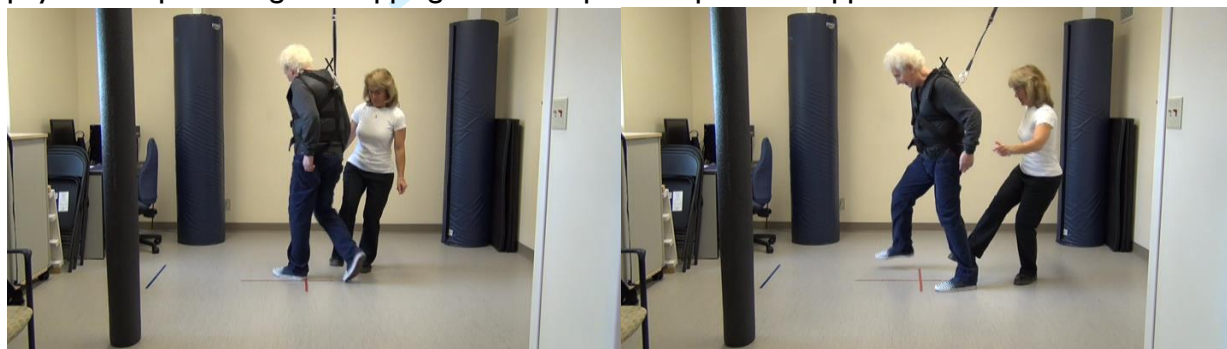

**Figure 6.9. Trip perturbation.** The physiotherapist catches the participants' limb with her foot while walking.

## Descriptions of voluntary tasks

**Standing still with feet hip-width apart** – participant stands unassisted with the eyes open and the feet positioned as wide as the hips. The lean-and-release perturbations are performed in random directions (forward, backward and lateral).

Adaptation to reduce difficulty – have participant adopt a wider base of support (BOS)

Adaptation to increase difficulty – have participant stand with the feet together

Progressions of this task:

Eyes closed – if participant is unable, the lights in the room should be dimmed (alternatively, dark sunglasses may be worn)

Standing on a thin foam mat

Standing on a thick foam mat

Turning head to the right and left – to spot a target

Looking up and down – to spot a target

Counting backwards by 3's – from a random number given by physiotherapist

Eyes closed and counting backwards – as written above, but combined

**Rapid weight-shifting left and right** – participant shifts his body weight from one foot to the other as quickly as possible, and the feet remain in contact with the floor. The task is repeated until all perturbations are accomplished.

Adaptation to reduce difficulty – have participant adopt a wider BOS



Adaptation to increase difficulty – have participant stand with the feet together

**Rapid weight-shifting forward and backward** – participant stands with feet either ‘side-by-side’ or in a ‘stride position’ and shifts his body weight forward and backward; if feet are ‘side-by-side’ then body weight rocks from toes to heels and back; if feet are in stride then body weight transfers from one foot to the other as quickly as possible; part of each foot always remains in contact with the floor. The task is repeated until all perturbations are accomplished.

Adaptation to reduce difficulty – have participant adopt a wider BOS, with the feet either side-by-side or in stride

Adaptation to increase difficulty – have participant stand with the feet together (if side-by-side) or with the feet in tandem (if in stride position)

**Throwing and catching a ball** – if the participant has use of both arms he should catch and throw a ball back and forth with the physiotherapist; if the participant has functional use of only one arm he should hit a ball back that has been thrown by the physiotherapist.

Adaptation to reduce difficulty – have participant adopt a wider BOS

Adaptation to increase difficulty – have participant stand with the feet together

**Rapid arm raises forward and to the sides** – participant raises one arm, then both arms, to 90 degrees of shoulder flexion as quickly as possible and stops as quickly as possible; participant raises two arms, then one arm at a time, to 90 degrees of shoulder abduction as quickly as possible and stops as quickly as possible.

Adaptation to reduce difficulty – have participant adopt a wider BOS

Adaptation to increase difficulty – have participant stand with the feet together

**Rapid stepping forward with alternate feet** – participant steps forward as quickly as possible with the right foot then returns it to the starting position, then steps forward as quickly as possible with the left foot, and then returns it to the starting position; there should be a transfer of body weight to the stepping foot once it touches down in the forward position. The task is repeated until all perturbations are accomplished.

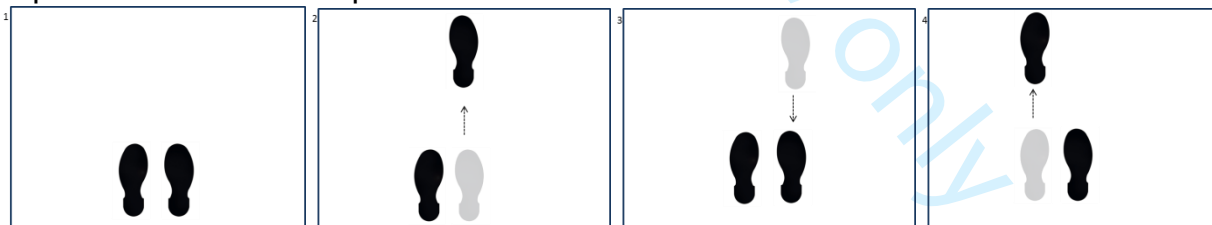

Figure 6.10. Rapid stepping forward with alternate feet

Adaptation to reduce difficulty – have participant take short steps

Adaptation to increase difficulty – have participant take long steps

Progressions of this task:

Standing on a thin foam mat

**Rapid stepping backward with alternate feet** – participant steps backward as quickly as possible with the right foot, then returns it to the starting position, then steps backward as quickly as possible with the left foot, and then returns it to the starting position; there should be a transfer of body weight to the stepping foot once it touches down in the backward position. The task is repeated until all perturbations are accomplished.

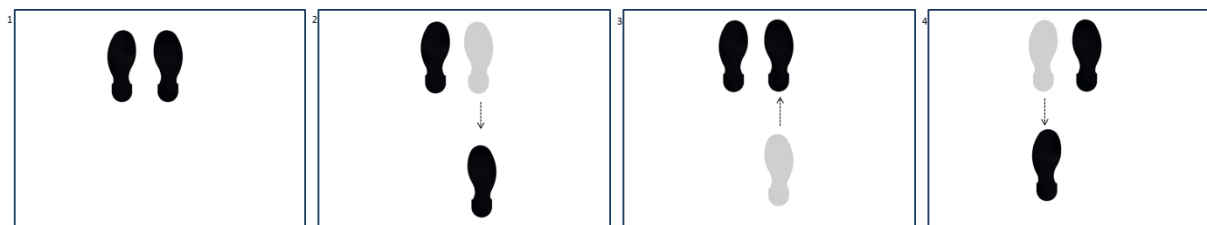

Figure 6.11. Rapid stepping backward with alternate feet

Adaptation to reduce difficulty – have participant take short steps

Adaptation to increase difficulty – have participant take long steps

Progressions of this task:

Standing on a thin foam mat

**Rapid stepping to the right (right foot)** – participant steps with the right foot to the right as quickly as possible, then back to the starting position; there should be transfer of body weight to the right foot once it touches down in the lateral position. The task is repeated until all perturbations are accomplished.

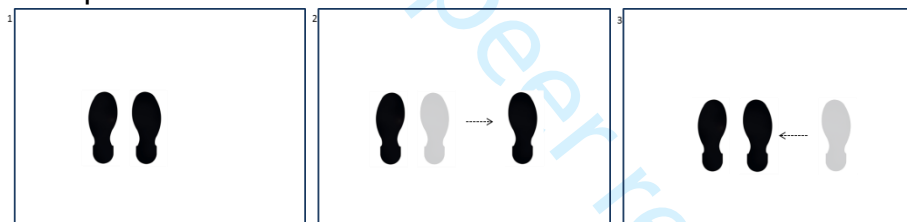

Figure 6.12. Rapid stepping to the right (right foot)

Adaptation to reduce difficulty – have participant take short steps

Adaptation to increase difficulty – have participant take long steps

**Rapid stepping to the left (left foot)** – participant steps with the left foot to the left as quickly as possible, then back to the starting position; there should be transfer of body weight to the left foot once it touches down in the lateral position. The task is repeated until all perturbations are accomplished.

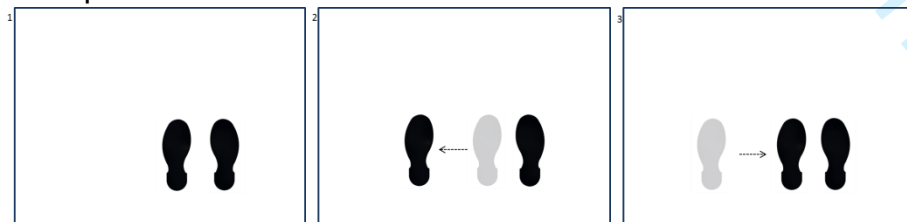

Figure 6.13. Rapid stepping to the left (left foot)

Adaptation to reduce difficulty – have participant take short steps

Adaptation to increase difficulty – have participant take long steps

**Rapid stepping to alternate sides** – participant steps with the right foot to the right as quickly as possible (including body weight transfer), then back to the starting position; then he steps with the left foot to the left as quickly as possible (including body weight transfer), then back to the starting position. The task is repeated until all perturbations are accomplished.



Figure 6.14. Rapid stepping to alternate sides

Adaptation to reduce difficulty – have participant take short steps

Adaptation to increase difficulty – have participant take long steps

Progressions of this task:

Standing on a thin foam mat

**Rapid tap-ups forward with alternate feet** – participant stands with a step in front of his feet; he lifts up the right foot and lightly touches the step, then places it back on the floor; then he lifts up the left foot and lightly touches the step, then places it back on the floor. The goal is to maintain the body weight over the stance limb, i.e. no transfer of body weight forward. The task is repeated until all perturbations are accomplished.



Figure 6.15. Rapid tap-ups forward with alternate feet

Adaptation to reduce difficulty – have participant tap-up to a low step

Adaptation to increase difficulty – have participant tap-up to an unstable surface, e.g. a soccer ball

Progressions of this task:

Standing on a thin foam mat

**Walking in place** – participant alternates stepping with the right and the left foot. The participant should not move from the spot, though a small amount of ‘drift’ is typical. The task is repeated until all perturbations are accomplished.

Adaptation to reduce difficulty – have participant step with minimal height from floor

Adaptation to increase difficulty – have participant step with maximum height from floor, i.e. knees raised to hip-height

Progressions of this task:

Walking on the spot on a thin foam mat

Eyes closed – if participant is unable, the lights in the room should be dimmed

Increased speed to 'jogging', or fast walking, on the spot

Jogging, or fast walking, on the spot on a thin foam mat

**Rapid stepping forward and backward with the right foot** – participant shifts his body weight to the left foot and then steps forward with the right foot, shifting some body weight forward but not enough to completely unweight the left; then the participant shifts his body weight back to the left foot in order to take a full step as far backward as possible with the right foot, and accepts some body weight on the right. The task is repeated until all perturbations are accomplished.

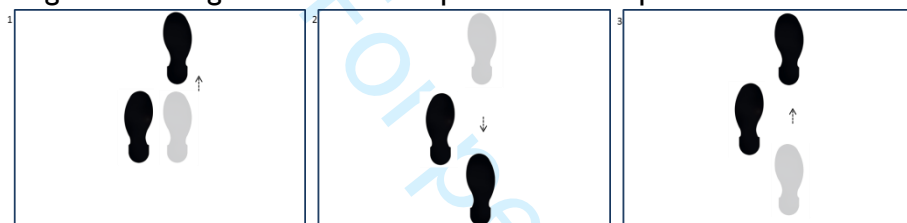

Figure 6.16. Rapid stepping forward and backward with the right foot

Adaptations to reduce difficulty – have participant take short steps; have participant rest momentarily between transitioning from front to back or from back to front

Adaptation to increase difficulty – have participant take long steps

Progressions of this task:

Standing on a thin foam mat

**Rapid stepping forward and backward with the left foot** – participant shifts his body weight to the right foot and then steps forward with the left foot, shifting some body weight forward but not enough to completely unweight the right; then the participant shifts his body weight back to the right foot in order to take a full step as far backward as possible with the left foot, and accepts some body weight on the left. The task is repeated until all perturbations are accomplished.

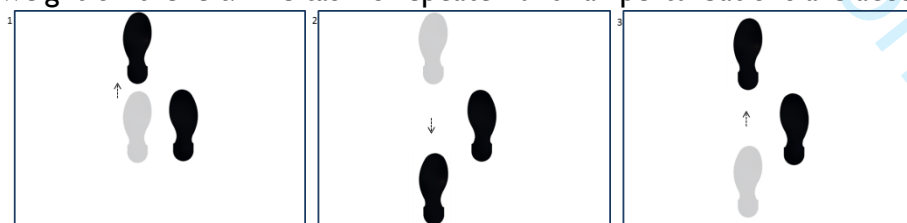

Figure 6.17. Rapid stepping forward and backward with the left foot

Adaptations to reduce difficulty – have participant take short steps; have participant rest momentarily between transitioning from front to back or from back to front

Adaptation to increase difficulty – have participant take long steps

Progressions of this task:

Standing on a thin foam mat

**Rapid step-ups with alternate feet** - participant stands with a step in front of his feet; he steps up onto the step with the right foot, shifts his body weight forward and steps up with the left foot, placing it on the step in a comfortably-wide position; then he steps down with the right foot, shifts his

body weight back onto the right foot and steps down with the left. The process is repeated with the right foot leading until 3 perturbations are completed; then the left leads until the final 3 perturbations are completed.

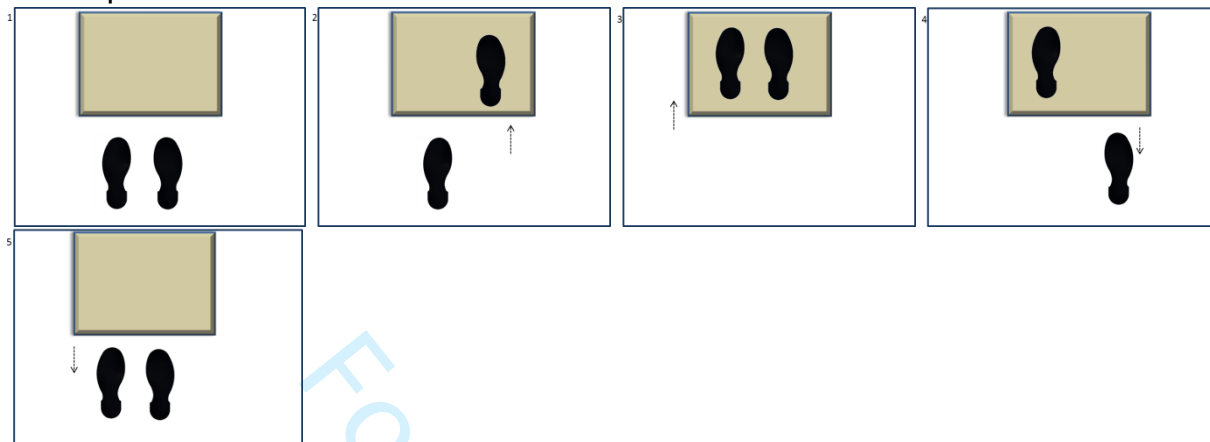

Figure 6.18. Rapid step-ups with alternate feet

Adaptation to reduce difficulty – have participant step-up to a low step

Adaptation to increase difficulty – have participant step-up to an unstable surface, for e.g., a step placed on a thin foam mat, or thick foam pad

Progressions of this task:

Standing on a thin foam mat – i.e. the person is standing on the mat, but the step may be on a hard surface, depending on the adaptation for difficulty

**Rapid tap-ups to alternate sides** – participant stands with a step lateral to each foot; he lifts up the right foot and lightly touches the step on the right, then places it back on the floor; then lifts up the left foot and lightly touches the step on the left, then places it back on the floor. The goal is to maintain the body weight over the stance limb, i.e., no transfer of body weight to the side tapping-up. The task is repeated until all perturbations are accomplished.

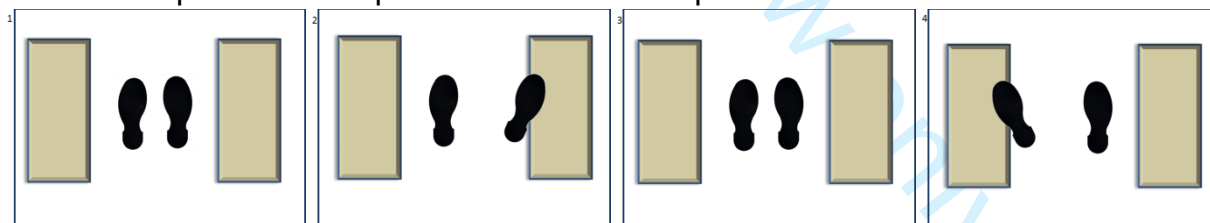

Figure 6.19. Rapid tap-ups to alternate sides

Adaptation to reduce difficulty – have participant tap-up to a low step

Adaptation to increase difficulty – have participant tap-up to an unstable surface, e.g. a soccer ball

Progressions of this task:

Standing on a thin foam mat – i.e. the person is standing on the mat, but the step/obstacle may be on a hard surface, depending on the adaptation for difficulty

**Rapid diagonal forward stepping with alternate feet** – participant steps diagonally forward (a 45° angle) as quickly as possible with the right foot, then returns it to the starting position, then steps diagonally forward as quickly as possible with the left foot, then returns it to the starting position; there should be a transfer of body weight to the stepping foot once it touches down in the diagonal position. The task is repeated until all perturbations are accomplished.

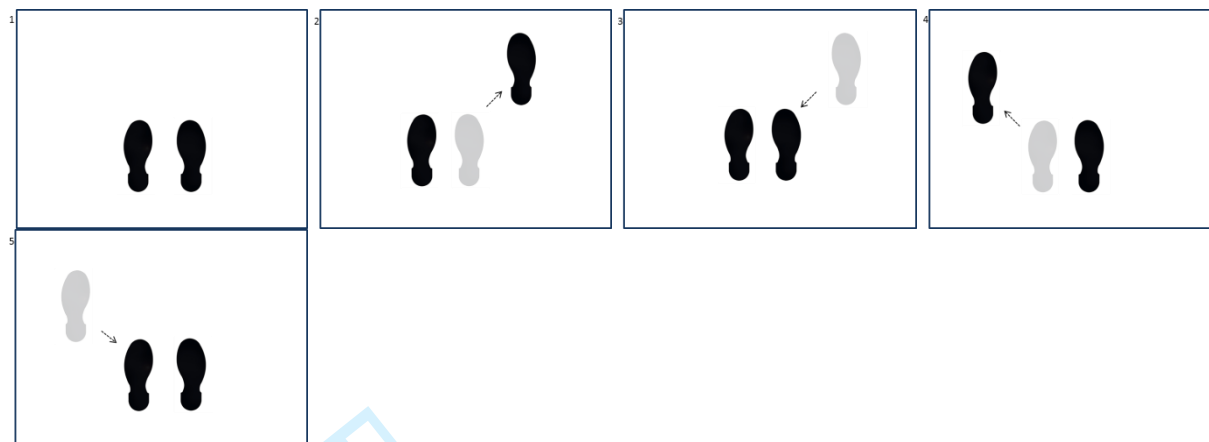

**Figure 6.20. Rapid diagonal forward stepping with alternate feet**

Adaptation to reduce difficulty – have participant take short steps

Adaptation to increase difficulty – have participant take long steps

Progressions of this task:

Standing on a thin foam mat

**Rapid stepping with alternate feet in random physiotherapist-cued directions** – participant stands in the centre of 6 targets placed on the floor (e.g., different colored Agility Dots); physiotherapist calls out a color and the participant steps to the colored dot with one foot (transferring some body weight) and then returns that foot to the centre; the process repeats with the next randomly called color. The task is repeated until all perturbations are accomplished.

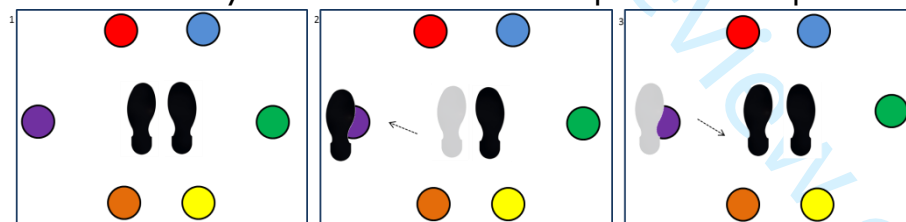

**Figure 6.21. Rapid stepping with alternate feet in random physiotherapist-cued directions**

Adaptation to reduce difficulty – targets require short steps

Adaptation to increase difficulty – targets require long steps

Progressions of this task:

Standing on a thin foam mat

**Walking forward** – participant takes steps to travel in a forward direction. Walking continues until all perturbations are accomplished.

Adaptations to reduce difficulty – have participant take short steps, or walk slowly

Adaptation to increase difficulty – have participant take long steps; traffic light\*

Progressions of this task:

Turning head to the right and left – to spot a target

Looking up and down – to spot a target

Stepping over obstacles –e.g. pool noodles

\* Traffic Light = participant walks at a fast pace like he would if crossing a street; physiotherapist counts down like the traffic light would in the crosswalk

Eyes closed – if participant is unable, the lights in the room should be dimmed  
Walking on a thin foam mat

**Forward braiding** – participant takes a step forward with the right foot that crosses the midline path and lands lateral to, and slightly ahead of, the left foot; then he brings the left foot out and around the right foot, taking a step across the midline path that lands lateral to, and slightly ahead of, the right foot; then the process repeats until all perturbations are accomplished.

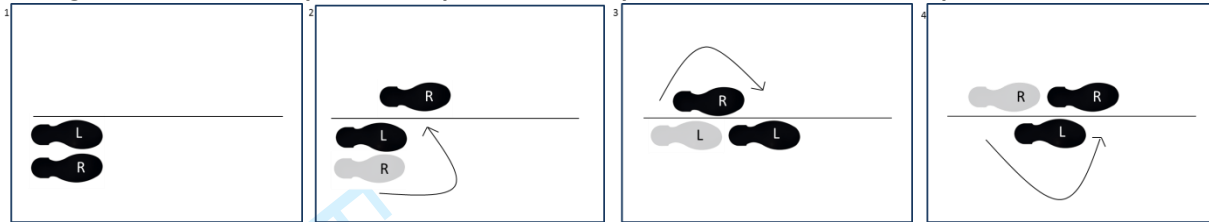

Figure 6.22. Forward braiding

Adaptation to reduce difficulty – walk on the line

Adaptations to increase difficulty - increase distance of step across line; take bigger steps; increase the walking speed

Progressions of this task:

Walking on a thin foam mat

**Side stepping** – participant stands on left side of room; he takes a step to the right with the right foot, followed by a step to the right (medially) with the left foot; the stepping continues until the edge of the room/available space is reached; then, starting from the right side of the room, he will walk in the opposite direction – left foot steps to left, followed by right foot stepping to left. Stepping continues until all perturbations are accomplished.

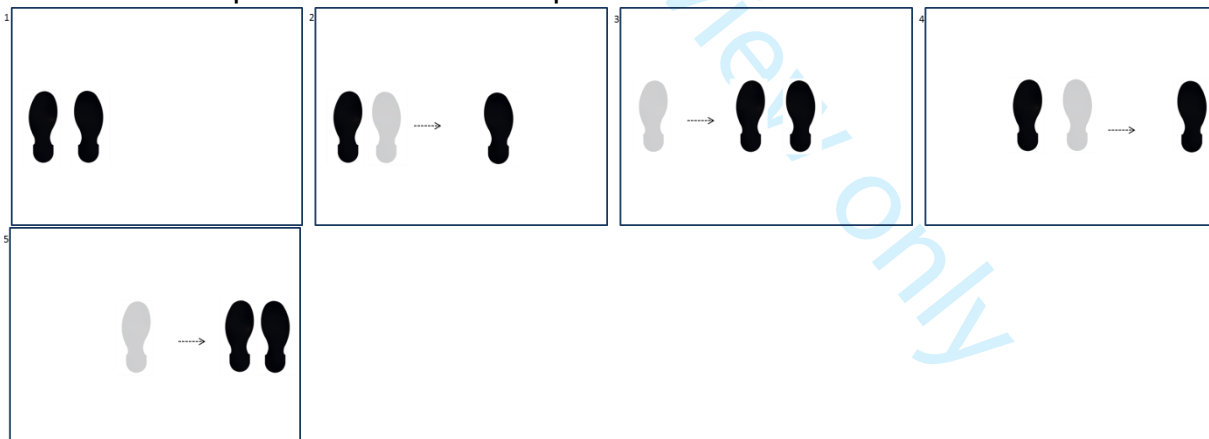

Figure 6.23. Side stepping

Adaptation to reduce difficulty – have participant take short steps

Adaptation to increase difficulty – have participant take long steps

Progressions of this task:

Stepping over obstacles –e.g. pool noodles

Walking on a thin foam mat

**Turning on the spot, alternating to the right and left** – participant takes steps to turn continuously in a clockwise direction. After a few turns (or 3 perturbations) the participant changes direction and turns counter-clockwise (until the final 3 perturbations are completed).



Adaptation to reduce difficulty – have participant turn slowly

Adaptations to increase difficulty – have participant turn quickly

Progressions of this task:

Eyes closed – if participant is unable, the lights in the room should be dimmed

Cued direction – physiotherapist calls out 'right' or 'left' and the participant turns in the direction called; it may be the same direction or a change in direction

Cued and Eyes closed – as written above but combined

**Four square stepping** – using tape, a cross is marked out on the floor creating 4 squares; participant stands in the bottom right-hand square facing forward; he is asked to step forward over the line with one foot then the other into the top right-hand square; then to step sideways, over the tape with the left foot and then the right into the top left-hand square; then to step backwards with one foot and then the other into the bottom left-hand square; and then finally, to step sideways with the right foot, then the left into the bottom right-hand square. He does that pattern a few times (or 3 perturbations) and then switches directions, moving in a clockwise pattern (until the final 3 perturbations are completed).

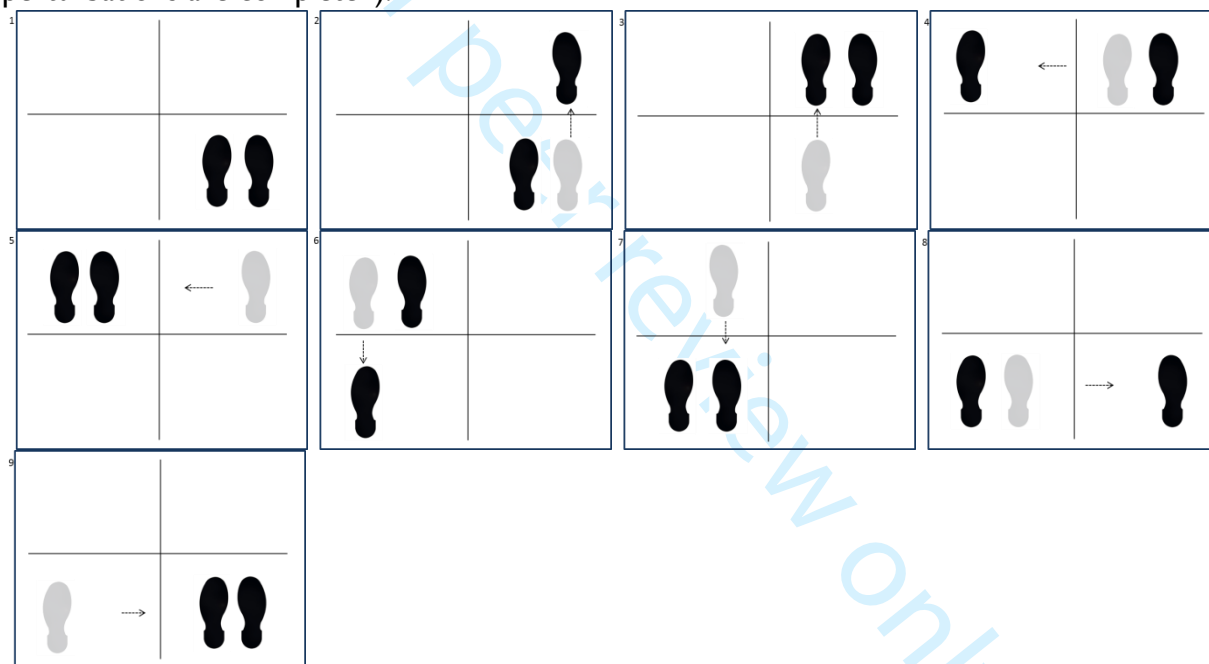

Figure 6.24. Four square stepping

Adaptation to reduce difficulty – have participant take short steps over the lines

Adaptation to increase difficulty – have participant take long steps over the lines

Progressions of this task:

Stepping on a thin foam mat

Cued direction – physiotherapist calls out 'change' or 'switch' and the participant begins moving in the opposite direction

**Walking backward** – participant takes steps to travel in a backward direction. Walking continues until all perturbations are accomplished.

Adaptation to reduce difficulty – have participant take short steps, or walk slowly

Adaptation to increase difficulty – have participant take long steps; traffic light

Progressions of this task:

Walking on a thin foam mat



**Tandem walking forward** - participant takes a step forward with the right foot and places the right heel ahead of the left toes; then he brings the left foot out and around the right foot, and places the left heel ahead of the right toes; then the process repeats until all perturbations are completed.

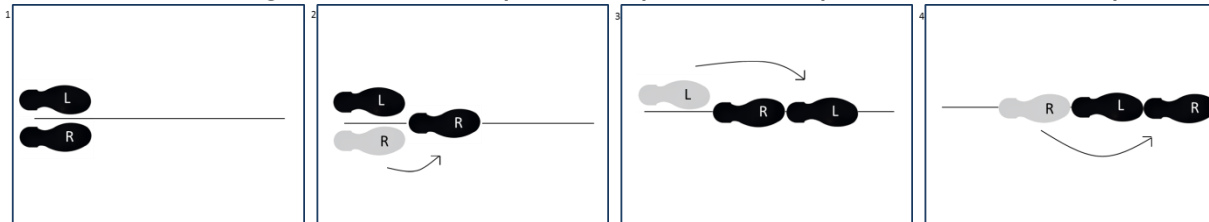

**Figure 6.25. Tandem walking**

Adaptations to reduce difficulty – participant takes longer steps (i.e. heel and toes don't touch) or participant places feet close to the line but not on the line

Adaptation to increase difficulty – traffic light

Progressions of this task:

Walking on a thin foam mat

**Sideways braiding** – participant stands at the right edge of the room; he is asked to walk to the left; he takes a step with the right foot that crosses over the left foot and lands lateral to, and slightly ahead of, the left foot, with part of his foot on the midline; then he brings the left foot out from behind the right and steps to the left, landing on the midline; then he takes a step with the right foot that crosses behind the left foot and lands lateral to, and slightly behind, the left foot, with part of his foot on the midline; then he takes the left foot over the right foot and steps to the left; and then the process repeats until he walks as far as he possibly can within the available space. Then he is asked to do the opposite and walk to the right. This pattern continues until all perturbations are accomplished.

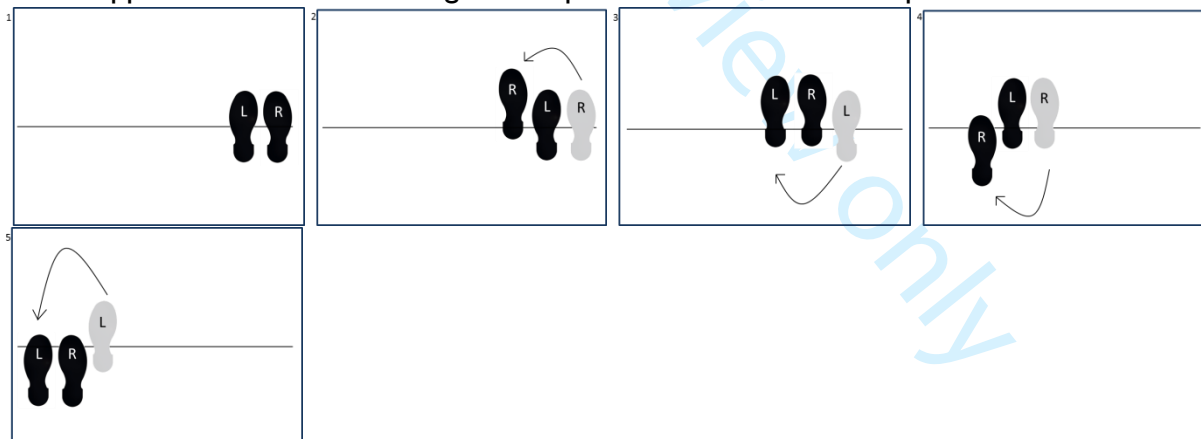

**Figure 6.26. Sideways braiding**

Adaptations to reduce difficulty – participant's foot does not fully cross over or behind the stance foot; or, participant's foot crosses but does not come into contact with midline

Adaptation to increase difficulty – traffic light

Progressions of this task:

Walking on a thin foam mat

**Tandem walking backward** - participant takes a step backward with the right foot and places the right toes behind the left heel; then he brings the left foot out and around the right foot, and places the left toes behind the right heel; then the process repeats until all perturbations are completed.

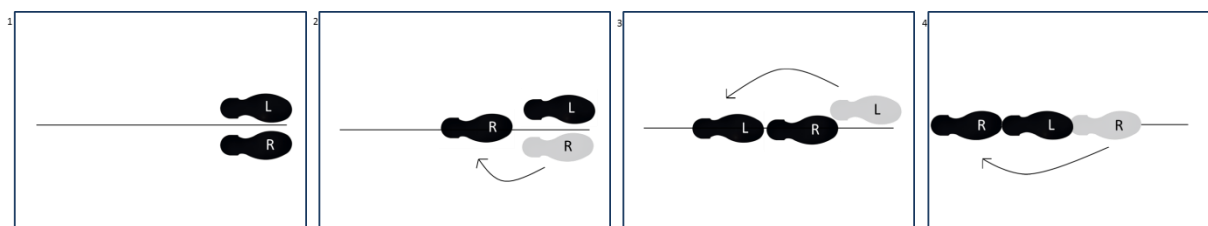

Figure 6.27. Tandem walking backward

Adaptations to reduce difficulty – participant takes longer steps (i.e. heel and toes don't touch) or participant places feet close to the line but not on the line

Adaptation to increase difficulty – traffic light

Progressions of this task:

Walking on a thin foam mat

**Backward braiding** – participant takes a step backward with the right foot that crosses the midline path and lands lateral to, and slightly behind, the left foot; then he brings the left foot out and around the right foot, taking a step backwards across the midline path that lands lateral to, and slightly behind, the right foot; then the process repeats until all perturbations are accomplished.

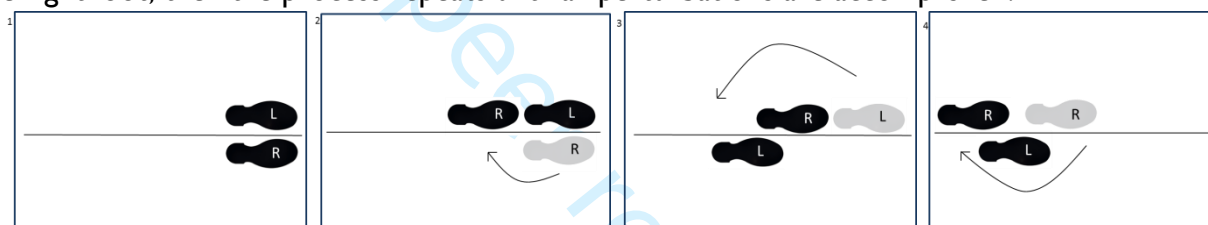

Figure 6.28. Backward braiding

Adaptation to reduce difficulty – walking on the line

Adaptations to increase difficulty - increase distance of step across line; take longer steps; traffic light

Progressions of this task:

Walking on a thin foam mat

**Kicking a soccer ball against wall** – participant stands at least 1 metre away from a wall; he kicks a soccer ball with enough force that it bounces back to him from the wall; he receives the ball and kicks it again. The task is repeated until all perturbations are accomplished.

Adaptation to reduce difficulty – none

Adaptations to increase difficulty – have participant stand further away from the wall; have participant kick it outside of his base of support; have participant alternate kicking with each foot

Progressions of this task:

Standing on a thin foam mat

Kicking the ball to the physiotherapist and receiving it back; this may require moving to reach the ball

Kicking the ball with the physiotherapist while standing on a thin foam mat

**Throwing a handball against the wall** – participant stands at least 1 metre away from a wall; he throws a hand ball with enough force that it bounces back to him from the wall; he receives the ball and throws it again. The task is repeated until all perturbations are accomplished.

Adaptation to reduce difficulty – have participant throw a large ball

1  
2 Adaptations to increase difficulty – have participant throw a small ball; have participant stand  
3 further away from the wall; have participant throw the ball with each arm

4 Progressions of this task:

5 Standing on a thin foam mat

6 Throwing the ball to the physiotherapist and receiving it back; this may require moving  
7 to catch it

8 Throwing the ball with the physiotherapist while standing on a thin foam mat  
9

10  
11 **Walking with sudden stops and changes in direction** – participant walks forward and at any  
12 time, the physiotherapist says ‘stop’, and the participant has to stop walking quickly, or says ‘right’  
13 (‘left’), and the participant has to turn to the right (left) and continue walking. The task continues until  
14 all perturbations are accomplished.

15 Adaptation to reduce difficulty – have participant walk slowly

16 Adaptation to increase difficulty – have participant walk quickly

17 Progressions of this task:

18 Stepping over obstacles, e.g. pool noodles or steps – the participant has to walk in the  
19 frame and manage the obstacles while also stopping or changing direction on command  
20  
21

22  
23 **Move to different corners of the room** – participant stands in the centre of the room facing  
24 forward; he is asked to move to one corner of the room (marked with different colored Agility Dots  
25 or numbers); he walks forward to the corners in front of him, then backward to return to the start  
26 position, or he walks backward to the corners behind him, then forward to return to the start  
27 position. The task continues until all perturbations are accomplished.

28 Adaptation to reduce difficulty – have participant walk slowly

29 Adaptation to increase difficulty – have participant walk quickly

30 Progressions of this task:

31 Stepping over obstacles, e.g. pool noodles or steps – the participant has to walk in the  
32 frame and manage the obstacles while making his way to the correct pole  
33  
34

35  
36 **Dodgeball** – the participant must avoid being hit by the ball that is being thrown at him by the  
37 physiotherapist. This requires transfer of weight and reactive stepping.

38 Adaptation to reduce difficulty – physiotherapist throws ball at upper body

39 Adaptation to increase difficulty – physiotherapist throws ball rapidly at participant’s feet  
40  
41  
42  
43  
44  
45  
46  
47  
48  
49  
50  
51  
52  
53  
54  
55  
56  
57  
58

**6. RATING OF PERCEIVED CHALLENGE SCALE**

|                           |                                                                                     |   |
|---------------------------|-------------------------------------------------------------------------------------|---|
| NO CHALLENGE AT ALL       | 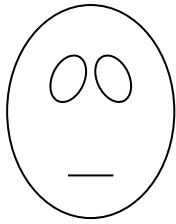   | 1 |
| A LITTLE BIT OF CHALLENGE |    | 2 |
| SOME CHALLENGE            |   | 3 |
| MUCH CHALLENGE            |  | 4 |
| CAN NOT DO                |  | 5 |

ADAPTED FROM: DARTHMOUTH COOP FUNCTIONAL ASSESSMENT CHARTS / WONCO (World Organization of Family Doctors) 1995

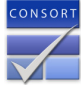

## CONSORT 2010 checklist of information to include when reporting a randomised trial\*

| Section/Topic                    | Item No | Checklist item                                                                                                                                                                              | Reported on page No |
|----------------------------------|---------|---------------------------------------------------------------------------------------------------------------------------------------------------------------------------------------------|---------------------|
| <b>Title and abstract</b>        |         |                                                                                                                                                                                             |                     |
|                                  | 1a      | Identification as a randomised trial in the title                                                                                                                                           | _____               |
|                                  | 1b      | Structured summary of trial design, methods, results, and conclusions (for specific guidance see CONSORT for abstracts)                                                                     | _____               |
| <b>Introduction</b>              |         |                                                                                                                                                                                             |                     |
| Background and objectives        | 2a      | Scientific background and explanation of rationale                                                                                                                                          | _____               |
|                                  | 2b      | Specific objectives or hypotheses                                                                                                                                                           | _____               |
| <b>Methods</b>                   |         |                                                                                                                                                                                             |                     |
| Trial design                     | 3a      | Description of trial design (such as parallel, factorial) including allocation ratio                                                                                                        | _____               |
|                                  | 3b      | Important changes to methods after trial commencement (such as eligibility criteria), with reasons                                                                                          | _____               |
| Participants                     | 4a      | Eligibility criteria for participants                                                                                                                                                       | _____               |
|                                  | 4b      | Settings and locations where the data were collected                                                                                                                                        | _____               |
| Interventions                    | 5       | The interventions for each group with sufficient details to allow replication, including how and when they were actually administered                                                       | _____               |
| Outcomes                         | 6a      | Completely defined pre-specified primary and secondary outcome measures, including how and when they were assessed                                                                          | _____               |
|                                  | 6b      | Any changes to trial outcomes after the trial commenced, with reasons                                                                                                                       | _____               |
| Sample size                      | 7a      | How sample size was determined                                                                                                                                                              | _____               |
|                                  | 7b      | When applicable, explanation of any interim analyses and stopping guidelines                                                                                                                | _____               |
| <b>Randomisation:</b>            |         |                                                                                                                                                                                             |                     |
| Sequence generation              | 8a      | Method used to generate the random allocation sequence                                                                                                                                      | _____               |
|                                  | 8b      | Type of randomisation; details of any restriction (such as blocking and block size)                                                                                                         | _____               |
| Allocation concealment mechanism | 9       | Mechanism used to implement the random allocation sequence (such as sequentially numbered containers), describing any steps taken to conceal the sequence until interventions were assigned | _____               |
| Implementation                   | 10      | Who generated the random allocation sequence, who enrolled participants, and who assigned participants to interventions                                                                     | _____               |
| Blinding                         | 11a     | If done, who was blinded after assignment to interventions (for example, participants, care providers, those                                                                                | _____               |

|    |                          |     |                                                                                                                  |       |
|----|--------------------------|-----|------------------------------------------------------------------------------------------------------------------|-------|
| 1  |                          |     |                                                                                                                  |       |
| 2  |                          |     | assessing outcomes) and how                                                                                      | _____ |
| 3  |                          |     |                                                                                                                  | _____ |
| 4  |                          | 11b | If relevant, description of the similarity of interventions                                                      | _____ |
| 5  | Statistical methods      | 12a | Statistical methods used to compare groups for primary and secondary outcomes                                    | _____ |
| 6  |                          | 12b | Methods for additional analyses, such as subgroup analyses and adjusted analyses                                 | _____ |
| 7  |                          |     |                                                                                                                  |       |
| 8  | <b>Results</b>           |     |                                                                                                                  |       |
| 9  | Participant flow (a      | 13a | For each group, the numbers of participants who were randomly assigned, received intended treatment, and         |       |
| 10 | diagram is strongly      |     | were analysed for the primary outcome                                                                            | _____ |
| 11 | recommended)             | 13b | For each group, losses and exclusions after randomisation, together with reasons                                 | _____ |
| 12 | Recruitment              | 14a | Dates defining the periods of recruitment and follow-up                                                          | _____ |
| 13 |                          | 14b | Why the trial ended or was stopped                                                                               | _____ |
| 14 | Baseline data            | 15  | A table showing baseline demographic and clinical characteristics for each group                                 | _____ |
| 15 | Numbers analysed         | 16  | For each group, number of participants (denominator) included in each analysis and whether the analysis was      |       |
| 16 |                          |     | by original assigned groups                                                                                      | _____ |
| 17 |                          |     |                                                                                                                  |       |
| 18 | Outcomes and             | 17a | For each primary and secondary outcome, results for each group, and the estimated effect size and its            |       |
| 19 | estimation               |     | precision (such as 95% confidence interval)                                                                      | _____ |
| 20 |                          | 17b | For binary outcomes, presentation of both absolute and relative effect sizes is recommended                      | _____ |
| 21 | Ancillary analyses       | 18  | Results of any other analyses performed, including subgroup analyses and adjusted analyses, distinguishing       |       |
| 22 |                          |     | pre-specified from exploratory                                                                                   | _____ |
| 23 |                          |     |                                                                                                                  |       |
| 24 | Harms                    | 19  | All important harms or unintended effects in each group (for specific guidance see CONSORT for harms)            | _____ |
| 25 |                          |     |                                                                                                                  |       |
| 26 | <b>Discussion</b>        |     |                                                                                                                  |       |
| 27 | Limitations              | 20  | Trial limitations, addressing sources of potential bias, imprecision, and, if relevant, multiplicity of analyses | _____ |
| 28 | Generalisability         | 21  | Generalisability (external validity, applicability) of the trial findings                                        | _____ |
| 29 | Interpretation           | 22  | Interpretation consistent with results, balancing benefits and harms, and considering other relevant evidence    | _____ |
| 30 |                          |     |                                                                                                                  |       |
| 31 | <b>Other information</b> |     |                                                                                                                  |       |
| 32 | Registration             | 23  | Registration number and name of trial registry                                                                   | _____ |
| 33 | Protocol                 | 24  | Where the full trial protocol can be accessed, if available                                                      | _____ |
| 34 | Funding                  | 25  | Sources of funding and other support (such as supply of drugs), role of funders                                  | _____ |
| 35 |                          |     |                                                                                                                  |       |

36

37 \*We strongly recommend reading this statement in conjunction with the CONSORT 2010 Explanation and Elaboration for important clarifications on all the items. If relevant, we also

38 recommend reading CONSORT extensions for cluster randomised trials, non-inferiority and equivalence trials, non-pharmacological treatments, herbal interventions, and pragmatic trials.

39 Additional extensions are forthcoming: for those and for up to date references relevant to this checklist, see [www.consort-statement.org](http://www.consort-statement.org).

40

41

## The TIDieR (Template for Intervention Description and Replication) Checklist\*:

Information to include when describing an intervention and the location of the information

| Item number | Item                                                                                                                                                                                                                                                                                                                | Where located **                        |                   |
|-------------|---------------------------------------------------------------------------------------------------------------------------------------------------------------------------------------------------------------------------------------------------------------------------------------------------------------------|-----------------------------------------|-------------------|
|             |                                                                                                                                                                                                                                                                                                                     | Primary paper (page or appendix number) | Other † (details) |
| 1.          | <b>BRIEF NAME</b><br>Provide the name or a phrase that describes the intervention.                                                                                                                                                                                                                                  | _____                                   | _____             |
| 2.          | <b>WHY</b><br>Describe any rationale, theory, or goal of the elements essential to the intervention.                                                                                                                                                                                                                | _____                                   | _____             |
| 3.          | <b>WHAT</b><br>Materials: Describe any physical or informational materials used in the intervention, including those provided to participants or used in intervention delivery or in training of intervention providers.<br>Provide information on where the materials can be accessed (e.g. online appendix, URL). | _____                                   | _____             |
| 4.          | Procedures: Describe each of the procedures, activities, and/or processes used in the intervention, including any enabling or support activities.                                                                                                                                                                   | _____                                   | _____             |
| 5.          | <b>WHO PROVIDED</b><br>For each category of intervention provider (e.g. psychologist, nursing assistant), describe their expertise, background and any specific training given.                                                                                                                                     | _____                                   | _____             |
| 6.          | <b>HOW</b><br>Describe the modes of delivery (e.g. face-to-face or by some other mechanism, such as internet or telephone) of the intervention and whether it was provided individually or in a group.                                                                                                              | _____                                   | _____             |
| 7.          | <b>WHERE</b><br>Describe the type(s) of location(s) where the intervention occurred, including any necessary infrastructure or relevant features.                                                                                                                                                                   | _____                                   | _____             |

|    |                          |                                                                                                    |  |
|----|--------------------------|----------------------------------------------------------------------------------------------------|--|
| 1  | <b>WHEN and HOW MUCH</b> |                                                                                                    |  |
| 2  |                          |                                                                                                    |  |
| 3  | <b>8.</b>                | Describe the number of times the intervention was delivered and over what period of time including |  |
| 4  |                          | the number of sessions, their schedule, and their duration, intensity or dose.                     |  |
| 5  |                          |                                                                                                    |  |
| 6  |                          | <b>TAILORING</b>                                                                                   |  |
| 7  |                          |                                                                                                    |  |
| 8  | <b>9.</b>                | If the intervention was planned to be personalised, titrated or adapted, then describe what, why,  |  |
| 9  |                          | when, and how.                                                                                     |  |
| 10 |                          |                                                                                                    |  |
| 11 |                          | <b>MODIFICATIONS</b>                                                                               |  |
| 12 |                          |                                                                                                    |  |
| 13 | <b>10.*</b>              | If the intervention was modified during the course of the study, describe the changes (what, why,  |  |
| 14 |                          | when, and how).                                                                                    |  |
| 15 |                          |                                                                                                    |  |
| 16 |                          | <b>HOW WELL</b>                                                                                    |  |
| 17 |                          |                                                                                                    |  |
| 18 | <b>11.</b>               | Planned: If intervention adherence or fidelity was assessed, describe how and by whom, and if any  |  |
| 19 |                          | strategies were used to maintain or improve fidelity, describe them.                               |  |
| 20 |                          |                                                                                                    |  |
| 21 | <b>12.*</b>              | Actual: If intervention adherence or fidelity was assessed, describe the extent to which the       |  |
| 22 |                          | intervention was delivered as planned.                                                             |  |
| 23 |                          |                                                                                                    |  |
| 24 |                          |                                                                                                    |  |

\*\* **Authors** - use N/A if an item is not applicable for the intervention being described. **Reviewers** – use ‘?’ if information about the element is not reported/not sufficiently reported.

† If the information is not provided in the primary paper, give details of where this information is available. This may include locations such as a published protocol or other published papers (provide citation details) or a website (provide the URL).

‡ If completing the TIDieR checklist for a protocol, these items are not relevant to the protocol and cannot be described until the study is complete.

\* We strongly recommend using this checklist in conjunction with the TIDieR guide (see *BMJ* 2014;348:g1687) which contains an explanation and elaboration for each item.

\* The focus of TIDieR is on reporting details of the intervention elements (and where relevant, comparison elements) of a study. Other elements and methodological features of studies are covered by other reporting statements and checklists and have not been duplicated as part of the TIDieR checklist. When a **randomised trial** is being reported, the TIDieR checklist should be used in conjunction with the CONSORT statement (see [www.consort-statement.org](http://www.consort-statement.org)) as an extension of **Item 5 of the CONSORT 2010 Statement**. When a **clinical trial protocol** is being reported, the TIDieR checklist should be used in conjunction with the SPIRIT statement as an extension of **Item 11 of the SPIRIT 2013 Statement** (see [www.spirit-statement.org](http://www.spirit-statement.org)). For alternate study designs, TIDieR can be used in conjunction with the appropriate checklist for that study design (see [www.equator-network.org](http://www.equator-network.org)).
