# Supplementary material for: Does perturbation-based balance training prevent falls among individuals with chronic stroke? A randomised controlled trial
Source: PubMed Central journal article supplement — BMJ Open. 2018 Aug 17;8(8):e021510. doi: 10.1136/bmjopen-2018-021510 (PMC6104758; doi:10.1136/bmjopen-2018-021510), 2018-08-17
Supplement: bmjopen-2018-021510supp001.pdf [file bmjopen-2018-021510supp001.pdf]

# **Toronto Perturbation-Based Balance Training**

## **Program Manual**

Program developed and manual written by: Avril Mansfield, Vincent DePaul,  
Cynthia Danells, Elizabeth Inness, Louis Biasin, Vivien Poon, and Svetlana Knorr

For further information, please contact: [avril.mansfield@uhn.ca](mailto:avril.mansfield@uhn.ca)

## Table of contents

|                                              |    |
|----------------------------------------------|----|
| Acknowledgements .....                       | 2  |
| List of abbreviations .....                  | 3  |
| Introduction .....                           | 4  |
| 1. Screening and assessment .....            | 5  |
| 2. Planning the program .....                | 10 |
| 3. The program .....                         | 12 |
| 4. Perturbation training log .....           | 14 |
| 5. Task descriptions .....                   | 44 |
| 6. Rating of perceived challenge scale ..... | 59 |

## **ACKNOWLEDGEMENTS**

The program described within this manual was developed by Avril Mansfield, Vince DePaul, Elizabeth Inness, Cynthia Danells, Louis Biasin, Vivien Poon, and Svetlana Knorr, who are research and clinical staff affiliated with the Toronto Rehabilitation Institute (AM, VDP, EI, CD, LB, VP, and SK), Sunnybrook Research Institute (AM), the University of Toronto (AM, EI, CD, LB, VP, and SK), and Queen's University at Kingston (VDP). The work described within this manual is supported by the Canadian Institute of Health Research (MOP-133577 and MSH-141983), the Heart and Stroke Foundation Canadian Partnership for Stroke Recovery, and the Ministry of Research and Innovation. We also acknowledge the support of Toronto Rehabilitation Institute. Equipment and space have been funded with grants from the Canada Foundation for Innovation, Ontario Innovation Trust, and the Ministry of Research and Innovation.

We thank Cynthia Campos, who provided illustrations, and Luigi Bianchi, who agreed to be photographed for the manual.

## **LIST OF ABBREVIATIONS**

AFO = ankle-foot orthosis  
BOS = base of support  
BP = blood pressure  
CMSA = Chedoke-McMaster Stroke Assessment  
DF = dorsiflexion  
EV = eversion  
HR = heart rate  
INV = inversion  
Mini-BES = Mini Balance Evaluation Systems (test)  
PBT = perturbation-based balance training  
PF = plantarflexion  
RPC = rating of perceived challenge  
TUG = timed-up and go

## **INTRODUCTION**

The **goal of PBT** is to improve reactive balance control in order to optimize safe independent mobility. The program requires that individuals repeatedly experience loss of balance (i.e., internal or manual postural perturbations) and are provided the opportunity to practice stepping reactions to regain balance following this instability. As participants adapt to the challenge and improve their balance control, the challenge should be increased. Challenge can be increased by increasing the magnitude of the manual perturbation, adding more challenging secondary movement and cognitive tasks, removing or altering sensory feedback, and changing the environment.

Note, for convenience and clarity of expression in this document, we use feminine pronouns to refer to the treating physiotherapist, and masculine pronouns to refer to the participant.

## **I. SCREENING AND ASSESSMENT**

### **I.1 An initial assessment is required to inform and guide treatment, and ensure patient safety.**

Information regarding significant medical history is obtained; specifically, does the participant:

- Have arthritis in the lower extremities or any other joint pain;
- Normally wear glasses or contact lenses;
- Normally use a cane, a rollator, or any other mobility aid;
- Normally wear an orthotic (brace) around the ankle and/or knee;
- Normally wear a sling around the arm/shoulder;
- Have diabetes;
- Take any medication on an “as needed” basis (i.e., PRN medication);
- Report any recent falls; and
- Have fear of falling?

Modifications to the manner in which the program is provided may be made based on responses to the questions above. For example, some activities might be avoided to prevent exacerbation of a previous injury.

The initial assessment includes:

- Assessment of reactive stepping using
  - Forward-fall lean-and-release perturbations under two conditions: usual response and encouraged use (5 trials per condition); and
  - Observation of reactions in the ‘Reactive’ component of the mini-Balance Evaluation Systems (mini-BES) test.
- Consideration of some of the contributors to impaired reactive stepping:
  - Stroke severity/stroke symptoms – e.g., using the National Institutes of Health Stroke Scale;
  - Stage of motor recovery – e.g., using the Chedoke McMaster Stroke Assessment (CMSA);
  - Balance confidence – e.g., using the Activity-specific Balance Confidence scale; and
  - Sensation (see Sections 1.4 and 1.5).

### **I.2 Lean and release assessment instructions.**

Control of reactive stepping following a postural perturbation is assessed using a lean-and-release system. Participants wear a safety harness attached to an overhead support system. The harness is also connected at the back to a beam via a quick-release mechanism (i.e., a modified crossbow trigger). The participant must lean forward from the ankles far such that approximately 10% of his body weight supported by the cable. Once achieved, the cable is released creating a forward fall from which the participant needs to recover. He is instructed step as quickly as possible to regain balance and come to stable stance. If he cannot regain stability independently, then the assessor can aid in the recovery and prevent a ‘fall’ (i.e., being caught by the safety harness).

Two conditions are assessed and recorded on the score sheet (see Section 1.3) – the ‘usual response’ and the ‘encouraged use’. The first five trials are completed as described above and the limb that

responds first to the release is recorded. This is the **'usual response'**. If the same limb responds  $\geq 4/5$  times, this is considered to be the **'preferred limb'**. In the **'encouraged use'** condition, five trials are completed with the preferred limb blocked and the participant is instructed to attempt to react with the non-preferred limb. The blocking is accomplished with the hand or foot of the physiotherapist/assessor. If it appears that the participant is going to step with the blocked limb, the hand/foot can be removed quickly, but the participant is not told that the block will be removed. If there is no obvious preferred limb (i.e., participant stepped 3 times with one leg and 2 with the other), then the limb that is blocked should alternate 2 times for one limb and 3 for the other.

The lean-and-release assessment is video-recorded and the video is reviewed later to observe any participant-specific impairments in reactive stepping (see also Section 4). While it might be possible to observe some obvious impairments in 'real time', often the reaction happens so quickly that this is not possible.

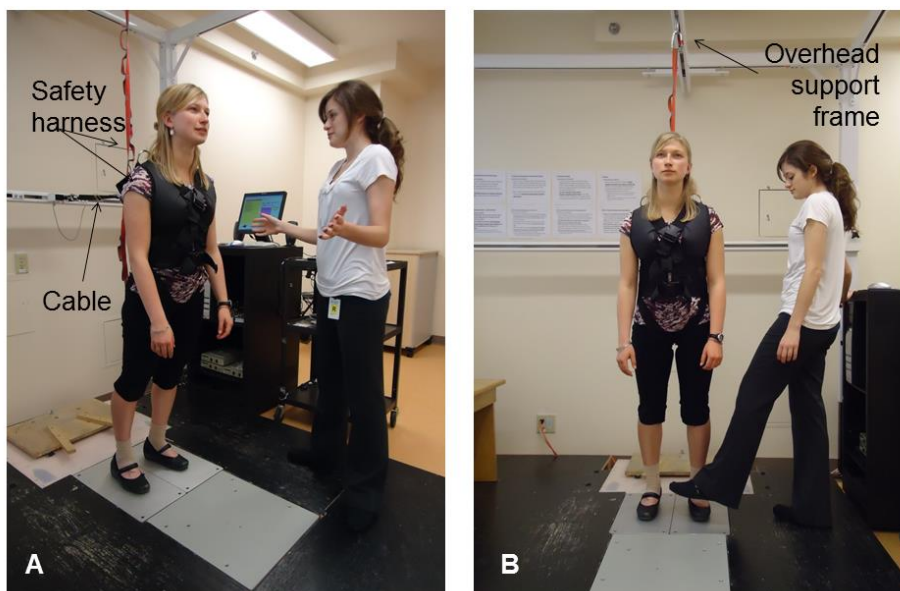

**Figure 1.1: The lean-and-release system.** Panel A (left) shows the usual response condition. Panel B (right) shows the encouraged-use condition. Figure taken from Mansfield et al., BMC Neurol. 2015;15:87

**1.3 Lean and release collection sheet.**

## Usual response

- Participant wearing harness
- Aim for 10% body weight on the cable
- Random delay between 'ready' signal and perturbation
- Review video to determine preferred limb & assists (if not clear during testing)
- Record limb for first step

| Test | Trial # | Comments | Limb                                                            | Assist                                                      |
|------|---------|----------|-----------------------------------------------------------------|-------------------------------------------------------------|
| 1    |         |          | <input type="checkbox"/> Right<br><input type="checkbox"/> Left | <input type="checkbox"/> No<br><input type="checkbox"/> Yes |
| 2    |         |          | <input type="checkbox"/> Right<br><input type="checkbox"/> Left | <input type="checkbox"/> No<br><input type="checkbox"/> Yes |
| 3    |         |          | <input type="checkbox"/> Right<br><input type="checkbox"/> Left | <input type="checkbox"/> No<br><input type="checkbox"/> Yes |
| 4    |         |          | <input type="checkbox"/> Right<br><input type="checkbox"/> Left | <input type="checkbox"/> No<br><input type="checkbox"/> Yes |
| 5    |         |          | <input type="checkbox"/> Right<br><input type="checkbox"/> Left | <input type="checkbox"/> No<br><input type="checkbox"/> Yes |

Preferred limb (initiated stepping in  $\geq 4/5$  trials with this limb):

- Right
- Left
- No clear preference

## Encouraged use

- Block preferred limb with researchers hand/foot; if no limb preference do two trials blocking one limb and three blocking the other
- Aim for 10% body weight on the cable
- Random delay between 'ready' signal and perturbation
- Review video to determine preferred limb & assists (if not clear during testing)
- Record limb for first step

| Test | Trial # | Comments | Limb                                                            | Assist                                                      |
|------|---------|----------|-----------------------------------------------------------------|-------------------------------------------------------------|
| 6    |         |          | <input type="checkbox"/> Right<br><input type="checkbox"/> Left | <input type="checkbox"/> No<br><input type="checkbox"/> Yes |
| 7    |         |          | <input type="checkbox"/> Right<br><input type="checkbox"/> Left | <input type="checkbox"/> No<br><input type="checkbox"/> Yes |
| 8    |         |          | <input type="checkbox"/> Right<br><input type="checkbox"/> Left | <input type="checkbox"/> No<br><input type="checkbox"/> Yes |
| 9    |         |          | <input type="checkbox"/> Right<br><input type="checkbox"/> Left | <input type="checkbox"/> No<br><input type="checkbox"/> Yes |
| 10   |         |          | <input type="checkbox"/> Right<br><input type="checkbox"/> Left | <input type="checkbox"/> No<br><input type="checkbox"/> Yes |



#### **I.4 Sensation assessment instructions.**

Exteroceptive and proprioceptive sensation are assessed in the affected foot and ankle. It is necessary to know if the participant appreciates light touch and movement of the ankle and foot. If these are absent or decreased, steps should be taken to accommodate the deficits in order to minimize potential injury due to PBT.

Sensation is assessed with the participant sitting on a raised plinth, feet dangling, with shoes and socks removed. Demonstration of the test should be done with the participant's eyes open and administered to the less-affected foot/ankle. The actual test should be administered to the more-affected foot/ankle following the demonstration with the participant's eyes closed.

**Light touch** is assessed using a cotton ball; the cotton ball should lightly touch but not brush the sole of the participant's foot. The foot is touched 5 times and the participant is instructed to respond when the touch is felt. Responses are recorded on the score sheet (see Section 1.5). If there is no response (and you are certain that the participant understood the instructions) this is recorded as a negative response.

The **perception of joint movement** is assessed in the ankle (dorsiflexion and plantar flexion) and in the foot (inversion and eversion). The participant's foot is held in two places: the bony prominences of the first and fifth meta-tarsal phalangeal joints and at the medial and lateral malleoli. Movements of the ankle should be demonstrated on the less-affected side as "up" for dorsiflexion and "down" for plantar flexion and, of the foot, as "in" for inversion and "out" for eversion. Care should be taken not to change the pressure of the hold during the movement. When being tested, movements should be through small ranges and time should be allowed for the participant to respond. If the participant is unsure of the direction of the movement, the range should be increased. If the participant is still unsure, then this is a negative response for the test. Five movements should be tested at the ankle and five at the foot.

Each correct, incorrect, or absent response is recorded on the score sheet (Section 1.5). If the participant scores <4/5 for light touch appreciation, and/or <8/10 for joint movement perception, then consideration is made for use of an Aircast Airport Ankle Brace during training.

## I.5 Sensation assessment collection sheet.

### Position recognition

| Position       | Correct response?            |
|----------------|------------------------------|
| Dorsiflexion   | <input type="checkbox"/> Yes |
|                | <input type="checkbox"/> No  |
| Plantarflexion | <input type="checkbox"/> Yes |
|                | <input type="checkbox"/> No  |
| Dorsiflexion   | <input type="checkbox"/> Yes |
|                | <input type="checkbox"/> No  |
| Dorsiflexion   | <input type="checkbox"/> Yes |
|                | <input type="checkbox"/> No  |
| Plantarflexion | <input type="checkbox"/> Yes |
|                | <input type="checkbox"/> No  |
| Number correct |                              |

| Position       | Correct response?            |
|----------------|------------------------------|
| Inversion      | <input type="checkbox"/> Yes |
|                | <input type="checkbox"/> No  |
| Eversion       | <input type="checkbox"/> Yes |
|                | <input type="checkbox"/> No  |
| Inversion      | <input type="checkbox"/> Yes |
|                | <input type="checkbox"/> No  |
| Eversion       | <input type="checkbox"/> Yes |
|                | <input type="checkbox"/> No  |
| Eversion       | <input type="checkbox"/> Yes |
|                | <input type="checkbox"/> No  |
| Number correct |                              |

If number correct is <8/10, an AirSport ankle brace should be used to prevent injury during PBT.

### Light touch sensation

| Trial          | Correct response?            |
|----------------|------------------------------|
| Trial 1        | <input type="checkbox"/> Yes |
|                | <input type="checkbox"/> No  |
| Trial 2        | <input type="checkbox"/> Yes |
|                | <input type="checkbox"/> No  |
| Trial 3        | <input type="checkbox"/> Yes |
|                | <input type="checkbox"/> No  |
| Trial 4        | <input type="checkbox"/> Yes |
|                | <input type="checkbox"/> No  |
| Trial 5        | <input type="checkbox"/> Yes |
|                | <input type="checkbox"/> No  |
| Number correct |                              |

If number correct is <4/5, an AirSport ankle brace should be used to prevent injury during PBT.

## **2. PLANNING THE PROGRAM**

### **2.1 The program is individualized to the participant's specific impairments in reactive balance control**

In order to create an effective training program, consideration is made of the participant's unique areas of dyscontrol (identified on initial assessment; see Section 1). Section 4 (Perturbation Training Log) outlines areas of dyscontrol and suggested treatment approaches for each problem. The principle of individual differences considers an individual's response to exercise. Therefore, progression should be gradual and systematic and occur at the individual participant's rate of improvement. Task difficulty is not absolute and could vary from participant-to-participant depending on specific control problems and other deficits.

### **2.2 List of equipment**

The following equipment is required for this specific program:

- Overhead harness support track;
- Fall-arrest approved safety harness;
- Equipment for task-specific activities:
  - Thin foam mat (e.g., thickness of yoga mat or 2.5 cm gym mat);
  - Thick foam pad (dense blue foam);
  - Hand ball (2 sizes; e.g., 10 cm diameter and tennis ball);
  - Soccer ball;
  - Steps (10 cm and 20 cm high);
  - Stop watch;
  - Unstable 'step' (if an unstable step is not available, place a regular step on a thin foam mat);
  - Cross marked out in tape on the floor (2 pieces of tape each at least 60 cm long placed to intersect at right angles (see Figure 6.24);
  - Set of 6 – 23 cm diameter multi-colored Agility Dots;
  - Foam obstacles (e.g., pool noodles or half-round foam rollers); and
- Participant-specific equipment (e.g., walking aid, ankle brace/orthosis, helmet, arm sling).

### **2.3 Ensuring safety during training**

#### **2.3.1 Safety harness**

Participants wear a safety harness attached to an overhead track at all times to prevent a fall to the ground. However, the harness system should be used as a back-up; the supervising physiotherapist still intervenes and provides physical assistance to 'brake the fall' when she feels the individual will not be able to recover balance. (Note, to allow participants the opportunity to practice stepping reactions, the physiotherapist **only** provides hands-on assistance if the participant is unable to regain stability alone.) The harness can prevent a fall to the floor but cannot prevent all possible injuries. Appropriate selection of participants, consideration of their underlying impairments, and appropriate supervision is still required. For example, it is possible that an individual could experience an ankle sprain while stepping in response to a perturbation (see Section 2.3.2). It is also possible that a frail individual who falls completely into the harness will experience an injury (e.g., bruise) because he is caught by the safety harness; a fracture could also be possible with a participant who has very low

bone mineral density. Participants should not be left ‘dangling’ in the safety harness as the straps can restrict circulation.

### **2.3.2 Protective equipment for ankle**

An ankle-foot orthosis (AFO; if prescribed) or an Aircast AirSport Ankle Brace is used during PBT if the participant meets one or more of the following criteria:

- Participant typically uses an AFO during home and/or community walking;
- CMSA foot score is stage 3 or lower;
- Ankle joint position sense score is <8/10 (see Section 1.4 and 1.5);
- Light touch sensation of the plantar surface of the foot score is <4/5 (see Section 1.4 and 1.5); and/or
- The treating physiotherapist feels this is necessary to preserve stability of the ankle joint and prevent injury.

Use of the AirSport Ankle Brace, AFO, or any other assistive devices should be documented in the Perturbation Training Log (Section 4).

### **2.3.3 Monitoring heart rate and blood pressure**

Heart rate (HR) and blood pressure (BP) are taken from the less affected arm using an automatic BP cuff. The less-affected arm is repositioned in an extended position resting on a table slightly below the level of the heart. If BP and/or HR fall outside of an ‘acceptable’ range (systolic BP is outside 90-140 mmHg; diastolic BP is outside 60-90 mmHg; or, HR is outside 60-100 bpm), a second measure is obtained. If the values continue to be outside of the range, the participant is asked to sit quietly for 5 minutes and perhaps, take a few deep breaths or drink a glass of water, before taking a third measurement. Participants with HR/BP measurements outside of the acceptable range are also questioned regarding recent medications (what they have taken and when, or if they have not taken their usual medications), when they last had something to eat/drink, and if they recently took caffeine, exercised, or smoked. The decision to continue or terminate the session is made by the physiotherapist considering factors such as the participants’ usual resting HR/BP, how far the measured values are outside of the acceptable range, the participants’ usual medication (e.g., beta-blockers), and the participants’ perception of how they are feeling. If the visit is terminated, the physiotherapist may advise that the participant follow-up with his primary care physician. If the visit continues, the physiotherapist may choose to monitor HR and BP regularly throughout the visit and observe cardiovascular responses to exercise.

### **3. THE PROGRAM**

#### **3.1 Overview**

The PBT program involves 12 1-hour training sessions provided 2 times per week for 6 weeks. Each session is 60 minutes in length and is provided in a one-to-one format. This core program is modified to fit with delivery of in-patient rehabilitation to allow for evaluation among individuals with sub-acute stroke.

Sessions begin with a 10-minute warm-up and end with a 10-minute cool-down following the warm-up and cool-down from the Keep Moving with Stroke program. Each session involves a minimum of ten ‘voluntary’ tasks that are each practiced for about 2 minutes. Once the participant is comfortable doing the task, the physiotherapist provides a manual perturbation to cause the participant to lose balance with the intent of evoking a reactive step (see Section 3.3). Six external perturbations are provided per task such that there are 60 external perturbations per session; however, fewer perturbations may be performed if participant tolerance is low. Participants might also experience a loss of balance (i.e., internal perturbation) due to failure to properly control balance during the voluntary task. Intensity of the session is determined by participant response; the participant should successfully regain stability with 1 or 2 steps and no assistance from the physiotherapist or safety harness 50% of the time. If the participant is too ‘successful’, the level of challenge is increased, or vice versa.

#### **3.2 Voluntary Tasks**

Each session involves ‘voluntary’ tasks that progress along a mobility continuum to evoke internal perturbations (i.e., loss of balance or self-destabilization):

- a) ‘Stable’ – the voluntary task is to maintain a static base of support;
- b) ‘Quasi-mobile’ – the voluntary task is to move the feet (e.g., stepping forward with alternate feet); however, the participant remains in place;
- c) ‘Mobile’ – the voluntary task is to move from one location to another (e.g., walking, side-stepping); and
- d) ‘Unpredictably mobile’ – the voluntary task is to move from one location to another in an unpredictable manner (e.g., kicking a soccer ball).

The challenge of each voluntary task can be influenced by manipulating other factors, such as:

- a) The sensory condition (e.g., firm to compliant surfaces, eyes open to eyes closed).
- b) The cognitive requirements (e.g. single task to multi-task, counting backwards, moving on cue).
- c) The environment (e.g., walking on even surface to walking over obstacles).

See “Description of Voluntary Tasks” in Section 5 for further information.

#### **3.3 Methods of Perturbation**

**Internal perturbations** are evoked when the participant attempts to perform a task that causes instability. Various voluntary tasks, including rapid ‘agility’ tasks (e.g., rapid step-ups) are used to evoke internal perturbations. A task that appears as easy as standing with eyes closed may cause an internal perturbation for a participant with poor balance control. However, some participants do not put themselves in situations causing a loss of balance or necessitating a stepping reaction (i.e., they will

perform agility tasks slowly); therefore, external perturbations are also included in every session to ensure a sufficient training dose.

**External perturbations** are caused by a force outside of the participant's control. Small-magnitude external perturbations may be used with participants who have lower functional abilities. It is usually easiest to start with perturbations that cause a fall towards the physiotherapist (i.e., pull or lean-and-release) so that the physiotherapist can control the outcome and alleviate participants' anxiety and facilitate participants' perceptions of safety. There are three methods for evoking external perturbations: 1) lean-and-release (predictable direction/magnitude; 2) push/pull (can be unpredictable in terms of direction and magnitude; or 3) trip during walking (see Section 5 for details).

### 3.4 Measurement

Measures are taken throughout the training to ensure: 1) focus on participant-specific problems; 2) ongoing progression; and 3) participant safety. The Perturbation Training Log (Section 4) is used to document the following:

- Performance on reactive stepping linked to key areas of focus (e.g., if a goal is to reduce frequency of multiple stepping then frequency of multiple stepping should be documented);
- Number of repetitions (i.e., number of times the participant experiences a loss of balance): '0' = balance recovered using 2 steps or fewer; '1' = balance recovered using more than 2 steps; and, 'X' = assistance provided by the safety harness or physiotherapist to recover balance;
- Additional tasks/conditions;
- Number of rest breaks;
- 'Rating of perceived challenge' (RPC) (Section 6);
- HR and/or BP (if indicated);

### 3.5 Format of training session

- 1) Participant arrives.
- 2) HR and BP are taken.
- 3) Warm-up is completed.
- 4) Harness is donned.
- 5) Tasks, as outlined in the Perturbation Training Log (Section 4), are performed for that particular session. Detailed descriptions of each task can be found in Section 5.
- 6) Documentation about and scoring of each task are completed before moving on to the next task.
- 7) Rest is taken as required, or after each task.
- 8) Cool-down and stretching are completed.

**4. PERTURBATION TRAINING LOG**

**Participant ID:** \_\_\_\_\_

**Affected side of body:** \_\_\_\_\_

**Does HR &/or BP need monitoring through session?**    Y    N

**Harness size:** \_\_\_\_\_

**Participant Equipment:**    AFO    AirSport    Arm Sling    Other

**Participant Goal(s):**

---

---

**Highlights of Assessment Findings:**

CMSA stage ( /7): Leg \_\_\_\_\_ Foot \_\_\_\_\_

Position Recognition (#correct/5): DF/PF \_\_\_\_\_ INV/EV \_\_\_\_\_

Light touch (#correct/5): \_\_\_\_\_

Berg balance scale ( /56): \_\_\_\_\_

Mini-BES - Reactive Postural Control ( /12): \_\_\_\_\_

TUG (sec): \_\_\_\_\_

Lean & Release – Preferred trials (#): Right \_\_\_\_\_ Left \_\_\_\_\_

Lean & Release – Encouraged use trials (#): Right \_\_\_\_\_ Left \_\_\_\_\_

**Comments:**

---

---

Participant ID: \_\_\_\_\_

Date: \_\_\_\_\_

**Treatment planning:**

| <b>Area of dyscontrol</b>                                                               | <b>Treatment suggestions</b>                                                                                                                                                                                                                                                                                                                                                                                              | <b>Additional treatment strategies/comments</b> |
|-----------------------------------------------------------------------------------------|---------------------------------------------------------------------------------------------------------------------------------------------------------------------------------------------------------------------------------------------------------------------------------------------------------------------------------------------------------------------------------------------------------------------------|-------------------------------------------------|
| <input type="checkbox"/> Requires external assist to regain stability                   | <input type="checkbox"/> Start with low-magnitude perturbation, increase magnitude as tolerated<br><input type="checkbox"/> Consider other problems that contribute, like delayed stepping or no stepping                                                                                                                                                                                                                 |                                                 |
| <input type="checkbox"/> Does not step when magnitude of perturbation requires a step   | <input type="checkbox"/> Instruct participant to step when s/he feels unstable<br><input type="checkbox"/> Start with low-magnitude perturbations<br><input type="checkbox"/> Start with predictable time/direction of perturbation<br><input type="checkbox"/> Practice the step prior to perturbation<br><input type="checkbox"/> Consider other problems that contribute, like unwillingness to step with paretic limb |                                                 |
| <input type="checkbox"/> Has low foot clearance during step: foot 'slides', or shuffles | <input type="checkbox"/> Use obstacles to 'force' a step-over                                                                                                                                                                                                                                                                                                                                                             |                                                 |
| <input type="checkbox"/> Demonstrates delayed stepping reaction                         | <input type="checkbox"/> Instruct participant to step as quickly as possible<br><input type="checkbox"/> Start with predictable time/direction of perturbation<br><input type="checkbox"/> If delay is with non-paretic limb, have participant weight-shift to paretic limb prior to perturbation                                                                                                                         |                                                 |



| Area of dyscontrol                                                           | Treatment suggestions                                                                                                                                                                                                                                                                                                                                               | Additional treatment strategies/comments |
|------------------------------------------------------------------------------|---------------------------------------------------------------------------------------------------------------------------------------------------------------------------------------------------------------------------------------------------------------------------------------------------------------------------------------------------------------------|------------------------------------------|
| <input type="checkbox"/> Is unwilling to step with paretic limb              | <input type="checkbox"/> Block the non-paretic limb with obstacles, or hand/ foot of physiotherapist<br><input type="checkbox"/> Instruct participant to step with paretic limb<br><input type="checkbox"/> Start with predictable time/direction of perturbation<br><input type="checkbox"/> Time perturbation to coincide with paretic leg/foot being un-weighted |                                          |
| <input type="checkbox"/> Demonstrates multi-step reactions                   | <input type="checkbox"/> Instruct participant to take as few steps as possible<br><input type="checkbox"/> Instruct participant to take long(er) steps                                                                                                                                                                                                              |                                          |
| <input type="checkbox"/> Stands asymmetrically prior to perturbation         | <input type="checkbox"/> Instruct participant to increase loading on the less-loaded limb<br><input type="checkbox"/> Consider using video or feedback of stance symmetry                                                                                                                                                                                           |                                          |
| <input type="checkbox"/> Takes short steps                                   | <input type="checkbox"/> Instruct participant to take longer steps<br><input type="checkbox"/> Step to targets<br><input type="checkbox"/> Step over obstacles                                                                                                                                                                                                      |                                          |
| <input type="checkbox"/> Attempts to use upper extremity to regain stability | <input type="checkbox"/> Physiotherapist should stand as far away as safely possible<br><input type="checkbox"/> Instruct to not use reach-to-grasp reactions<br><input type="checkbox"/> Have participant hold object to prevent grasping                                                                                                                          |                                          |

| Area of dyscontrol                                                                  | Treatment suggestions                                                                                                                                                                                                                                   | Additional treatment strategies/comments |
|-------------------------------------------------------------------------------------|---------------------------------------------------------------------------------------------------------------------------------------------------------------------------------------------------------------------------------------------------------|------------------------------------------|
| <input type="checkbox"/> Falls laterally on step termination                        | <input type="checkbox"/> Instruct participant to take as few steps as possible<br><input type="checkbox"/> Start with low-magnitude perturbation<br><input type="checkbox"/> Try forward/backward perturbations initially with a narrow base of support |                                          |
| <input type="checkbox"/> Uses 'crossover' steps to respond to lateral perturbations | <input type="checkbox"/> Instruct participant to use side-stepping strategy<br><input type="checkbox"/> Place large obstacles in front and behind participant to deter cross-overs                                                                      |                                          |
| <input type="checkbox"/> Is unable to step equally well in all directions           | <input type="checkbox"/> Use multi-directional perturbations<br><input type="checkbox"/> Do more perturbations in the most challenging direction                                                                                                        |                                          |

**'Stable' tasks: session 1**

|                      |            |                       |            |                       |            |
|----------------------|------------|-----------------------|------------|-----------------------|------------|
| <b>Initial - HR:</b> | <b>BP:</b> | <b>Repeat 1 - HR:</b> | <b>BP:</b> | <b>Repeat 2 - HR:</b> | <b>BP:</b> |
|----------------------|------------|-----------------------|------------|-----------------------|------------|

| <b>Voluntary task</b>                                                 | <b>Adaptation to reduce difficulty</b> | <b>Adaptation to increase difficulty</b> | <b>Perturbation</b>                  | <b>Outcome</b><br>(0= $\leq$ 2 steps, 1=multi step, X=loss of balance) | <b>RPC</b> | <b># Rests during task</b> | <b>Rest after task (Y/N)</b> |
|-----------------------------------------------------------------------|----------------------------------------|------------------------------------------|--------------------------------------|------------------------------------------------------------------------|------------|----------------------------|------------------------------|
| Standing still with feet hip-width apart                              | <input type="checkbox"/> Wide BOS      | <input type="checkbox"/> Feet together   | 6 multi-directional lean-and-release |                                                                        |            |                            |                              |
| Standing still with feet hip-width apart, eyes closed                 | <input type="checkbox"/> Wide BOS      | <input type="checkbox"/> Feet together   | 6 multi-directional lean-and-release |                                                                        |            |                            |                              |
| Standing still with feet hip-width apart, on a thin foam mat          | <input type="checkbox"/> Wide BOS      | <input type="checkbox"/> Feet together   | 6 multi-directional lean-and-release |                                                                        |            |                            |                              |
| Standing still with feet hip-width apart, on a thick foam pad         | <input type="checkbox"/> Wide BOS      | <input type="checkbox"/> Feet together   | 6 multi-directional lean-and-release |                                                                        |            |                            |                              |
| Standing still with feet hip-width apart, turning head left and right | <input type="checkbox"/> Wide BOS      | <input type="checkbox"/> Feet together   | 6 multi-directional lean-and-release |                                                                        |            |                            |                              |
| Standing still with feet hip-width apart, looking up and down         | <input type="checkbox"/> Wide BOS      | <input type="checkbox"/> Feet together   | 6 multi-directional lean-and-release |                                                                        |            |                            |                              |
| Standing with feet hip-width apart, counting backwards by 3's         | <input type="checkbox"/> Wide BOS      | <input type="checkbox"/> Feet together   | 6 multi-directional lean-and-release |                                                                        |            |                            |                              |

| <b>Voluntary task</b>                                                                                 | <b>Adaptation to reduce difficulty</b> | <b>Adaptation to increase difficulty</b> | <b>Perturbation</b>                  | <b>Outcome</b><br>(0= $\leq 2$ steps, I=multi step, X=loss of balance) | <b>RPC</b> | <b># Rests during task</b> | <b>Rest after task (Y/N)</b> |
|-------------------------------------------------------------------------------------------------------|----------------------------------------|------------------------------------------|--------------------------------------|------------------------------------------------------------------------|------------|----------------------------|------------------------------|
| Standing with feet hip-width apart, eyes closed & counting backwards by 3's                           | <input type="checkbox"/> Wide BOS      | <input type="checkbox"/> Feet together   | 6 multi-directional lean-and-release |                                                                        |            |                            |                              |
| Standing with feet hip-width apart, rapid weight-shifting left and right                              | <input type="checkbox"/> Wide BOS      | <input type="checkbox"/> Feet together   | 6 multi-directional push/pull        |                                                                        |            |                            |                              |
| Standing with feet hip-width apart, or in stride position, rapid weight-shifting forward and backward | <input type="checkbox"/> Wide BOS      | <input type="checkbox"/> Feet together   | 6 multi-directional push/pull        |                                                                        |            |                            |                              |
| Standing with feet hip-width apart, throwing & catching a ball                                        | <input type="checkbox"/> Wide BOS      | <input type="checkbox"/> Feet together   | internal                             |                                                                        |            |                            |                              |
| Standing with feet hip-width apart, rapid arm raises forward and to the sides                         | <input type="checkbox"/> Wide BOS      | <input type="checkbox"/> Feet together   | internal                             |                                                                        |            |                            |                              |

HR: \_\_\_\_\_

BP: \_\_\_\_\_

**Overall rating of perceived challenge:** \_\_\_\_\_

|                        |    |  |  |  |  |
|------------------------|----|--|--|--|--|
| <b>TOTALS/AVERAGES</b> | 0= |  |  |  |  |
|                        | I= |  |  |  |  |
|                        | X= |  |  |  |  |

**Overall comments for the session:** \_\_\_\_\_  
 \_\_\_\_\_  
 \_\_\_\_\_  
 \_\_\_\_\_

**'Stable' tasks: Session 2**

|                      |            |                       |            |                       |            |
|----------------------|------------|-----------------------|------------|-----------------------|------------|
| <b>Initial - HR:</b> | <b>BP:</b> | <b>Repeat 1 - HR:</b> | <b>BP:</b> | <b>Repeat 2 - HR:</b> | <b>BP:</b> |
|----------------------|------------|-----------------------|------------|-----------------------|------------|

| <b>Voluntary task</b>                                                       | <b>Adaptation to reduce difficulty</b> | <b>Adaptation to increase difficulty</b> | <b>Perturbation</b>                  | <b>Outcome</b><br>(0= $\leq$ 2 steps, 1=multi step, X=loss of balance) | <b>RPC</b> | <b># Rests during task</b> | <b>Rest after task (Y/N)</b> |
|-----------------------------------------------------------------------------|----------------------------------------|------------------------------------------|--------------------------------------|------------------------------------------------------------------------|------------|----------------------------|------------------------------|
| Standing still with feet hip-width apart                                    | <input type="checkbox"/> Wide BOS      | <input type="checkbox"/> Feet together   | 6 multi-directional lean-and-release |                                                                        |            |                            |                              |
| Standing still with feet hip-width apart, eyes closed                       | <input type="checkbox"/> Wide BOS      | <input type="checkbox"/> Feet together   | 6 multi-directional lean-and-release |                                                                        |            |                            |                              |
| Standing still with feet hip-width apart, on a thin foam mat                | <input type="checkbox"/> Wide BOS      | <input type="checkbox"/> Feet together   | 6 multi-directional lean-and-release |                                                                        |            |                            |                              |
| Standing still with feet hip-width apart, on a thick foam pad               | <input type="checkbox"/> Wide BOS      | <input type="checkbox"/> Feet together   | 6 multi-directional lean-and-release |                                                                        |            |                            |                              |
| Standing still with feet hip-width apart, turning head left and right       | <input type="checkbox"/> Wide BOS      | <input type="checkbox"/> Feet together   | 6 multi-directional lean-and-release |                                                                        |            |                            |                              |
| Standing still with feet hip-width apart, looking up and down               | <input type="checkbox"/> Wide BOS      | <input type="checkbox"/> Feet together   | 6 multi-directional lean-and-release |                                                                        |            |                            |                              |
| Standing with feet hip-width apart, counting backwards by 3's               | <input type="checkbox"/> Wide BOS      | <input type="checkbox"/> Feet together   | 6 multi-directional lean-and-release |                                                                        |            |                            |                              |
| Standing with feet hip-width apart, eyes closed & counting backwards by 3's | <input type="checkbox"/> Wide BOS      | <input type="checkbox"/> Feet together   | 6 multi-directional lean-and-release |                                                                        |            |                            |                              |
| Standing with feet hip-width apart, rapid weight-shifting left and right    | <input type="checkbox"/> Wide BOS      | <input type="checkbox"/> Feet together   | 6 multi-directional push/pull        |                                                                        |            |                            |                              |

| <b>Voluntary task</b>                                                                                 | <b>Adaptation to reduce difficulty</b> | <b>Adaptation to increase difficulty</b> | <b>Perturbation</b>           | <b>Outcome</b><br>(0= $\leq 2$ steps, I=multi step, X=loss of balance) | <b>RPC</b> | <b># Rests During task</b> | <b>Rest After task (Y/N)</b> |
|-------------------------------------------------------------------------------------------------------|----------------------------------------|------------------------------------------|-------------------------------|------------------------------------------------------------------------|------------|----------------------------|------------------------------|
| Standing with feet hip-width apart, or in stride position, rapid weight-shifting forward and backward | <input type="checkbox"/> Wide BOS      | <input type="checkbox"/> Feet together   | 6 multi-directional push/pull |                                                                        |            |                            |                              |
| Standing with feet hip-width apart, throwing & catching a ball                                        | <input type="checkbox"/> Wide BOS      | <input type="checkbox"/> Feet together   | internal                      |                                                                        |            |                            |                              |
| Standing with feet hip-width apart, rapid arm raises forward and to the sides                         | <input type="checkbox"/> Wide BOS      | <input type="checkbox"/> Feet together   | internal                      |                                                                        |            |                            |                              |
| Rapid stepping forward with alternate feet                                                            | <input type="checkbox"/> Short steps   | <input type="checkbox"/> Long steps      | internal                      |                                                                        |            |                            |                              |
| Rapid stepping backward with alternate feet                                                           | <input type="checkbox"/> Short steps   | <input type="checkbox"/> Long steps      | internal                      |                                                                        |            |                            |                              |
| Rapid stepping to the right (right foot)                                                              | <input type="checkbox"/> Short steps   | <input type="checkbox"/> Long steps      | internal                      |                                                                        |            |                            |                              |
| Rapid stepping to the left (left foot)                                                                | <input type="checkbox"/> Short steps   | <input type="checkbox"/> Long steps      | internal                      |                                                                        |            |                            |                              |

HR: \_\_\_\_\_

BP: \_\_\_\_\_

**Overall rating of perceived challenge:** \_\_\_\_\_

|                        |    |  |  |  |  |
|------------------------|----|--|--|--|--|
| <b>TOTALS/AVERAGES</b> | 0= |  |  |  |  |
|                        | I= |  |  |  |  |
|                        | X= |  |  |  |  |

**Overall comments for the session:** \_\_\_\_\_  
 \_\_\_\_\_  
 \_\_\_\_\_  
 \_\_\_\_\_

**'Quasi-mobile' tasks: Session 3**

|                      |            |                       |            |                       |            |
|----------------------|------------|-----------------------|------------|-----------------------|------------|
| <b>Initial - HR:</b> | <b>BP:</b> | <b>Repeat 1 - HR:</b> | <b>BP:</b> | <b>Repeat 2 - HR:</b> | <b>BP:</b> |
|----------------------|------------|-----------------------|------------|-----------------------|------------|

| <b>Voluntary task</b>                                           | <b>Adaptation to reduce difficulty</b>                  | <b>Adaptation to increase difficulty</b>                     | <b>Perturbation</b>           | <b>Outcome</b><br>(0= $\leq$ 2 steps, 1=multi step, X=loss of balance) | <b>RPC</b> | <b># Rests during task</b> | <b>Rest after task (Y/N)</b> |
|-----------------------------------------------------------------|---------------------------------------------------------|--------------------------------------------------------------|-------------------------------|------------------------------------------------------------------------|------------|----------------------------|------------------------------|
| Rapid stepping forward with alternate feet                      | <input type="checkbox"/> Short steps                    | <input type="checkbox"/> Long steps                          | 6 multi-directional push/pull |                                                                        |            |                            |                              |
| Rapid stepping backward with alternate feet                     | <input type="checkbox"/> Short steps                    | <input type="checkbox"/> Long steps                          | 6 multi-directional push/pull |                                                                        |            |                            |                              |
| Rapid stepping to alternate sides                               | <input type="checkbox"/> Short steps                    | <input type="checkbox"/> Long steps                          | 6 multi-directional push/pull |                                                                        |            |                            |                              |
| Rapid tap-ups forward with alternate feet                       | <input type="checkbox"/> Low step<br>Step Height: _____ | <input type="checkbox"/> Unstable surface (e.g. soccer ball) | 6 multi-directional push/pull |                                                                        |            |                            |                              |
| Walking in place                                                | <input type="checkbox"/> Feet barely off floor          | <input type="checkbox"/> Knees to hip-height                 | 6 multi-directional push/pull |                                                                        |            |                            |                              |
| Rapid stepping forward with alternate feet, on a thin foam mat  | <input type="checkbox"/> Short steps                    | <input type="checkbox"/> Long steps                          | 6 multi-directional push/pull |                                                                        |            |                            |                              |
| Rapid stepping backward with alternate feet, on a thin foam mat | <input type="checkbox"/> Short steps                    | <input type="checkbox"/> Long steps                          | 6 multi-directional push/pull |                                                                        |            |                            |                              |

| <b>Voluntary task</b>                                         | <b>Adaptation to reduce difficulty</b>                  | <b>Adaptation to increase difficulty</b>                     | <b>Perturbation</b>           | <b>Outcome</b><br>(0= $\leq$ 2 steps, I=multi step, X=loss of balance) | <b>RPC</b> | <b># Rests during task</b> | <b>Rest after task (Y/N)</b> |
|---------------------------------------------------------------|---------------------------------------------------------|--------------------------------------------------------------|-------------------------------|------------------------------------------------------------------------|------------|----------------------------|------------------------------|
| Rapid stepping to alternate sides, on a thin foam mat         | <input type="checkbox"/> Short steps                    | <input type="checkbox"/> Long steps                          | 6 multi-directional push/pull |                                                                        |            |                            |                              |
| Rapid tap-ups forward with alternate feet, on a thin foam mat | <input type="checkbox"/> Low step<br>Step Height: _____ | <input type="checkbox"/> Unstable surface (e.g. soccer ball) | 6 multi-directional push/pull |                                                                        |            |                            |                              |
| Walking in place, on a thin foam mat                          | <input type="checkbox"/> Feet barely off floor          | <input type="checkbox"/> Knees to hip-height                 | 6 multi-directional push/pull |                                                                        |            |                            |                              |

HR: \_\_\_\_\_

BP: \_\_\_\_\_

**Overall rating of perceived challenge:** \_\_\_\_\_

|                        |    |  |  |  |  |
|------------------------|----|--|--|--|--|
| <b>TOTALS/AVERAGES</b> | 0= |  |  |  |  |
|                        | I= |  |  |  |  |
|                        | X= |  |  |  |  |

**Overall comments for the session:** \_\_\_\_\_  
 \_\_\_\_\_  
 \_\_\_\_\_  
 \_\_\_\_\_



**'Quasi-mobile' tasks: Session 4**

|                      |            |                       |            |                       |            |
|----------------------|------------|-----------------------|------------|-----------------------|------------|
| <b>Initial - HR:</b> | <b>BP:</b> | <b>Repeat 1 - HR:</b> | <b>BP:</b> | <b>Repeat 2 - HR:</b> | <b>BP:</b> |
|----------------------|------------|-----------------------|------------|-----------------------|------------|

| <b>Voluntary task</b>                                                   | <b>Adaptation to reduce difficulty</b>                  | <b>Adaptation to increase difficulty</b>                     | <b>Perturbation</b>           | <b>Outcome</b><br>(0= $\leq$ 2 steps, 1=multi step, X=loss of balance) | <b>RPC</b> | <b># Rests during task</b> | <b>Rest after task (Y/N)</b> |
|-------------------------------------------------------------------------|---------------------------------------------------------|--------------------------------------------------------------|-------------------------------|------------------------------------------------------------------------|------------|----------------------------|------------------------------|
| Rapid stepping forward and backward with right foot                     | <input type="checkbox"/> Short steps; rest in stance    | <input type="checkbox"/> Long steps                          | 6 multi-directional push/pull |                                                                        |            |                            |                              |
| Rapid stepping forward and backward with left foot                      | <input type="checkbox"/> Short steps; rest in stance    | <input type="checkbox"/> Long steps                          | 6 multi-directional push/pull |                                                                        |            |                            |                              |
| Rapid tap-ups forward with alternate feet                               | <input type="checkbox"/> Low step<br>Step Height: _____ | <input type="checkbox"/> Unstable surface (e.g. soccer ball) | 6 multi-directional push/pull |                                                                        |            |                            |                              |
| Rapid step-ups with alternate feet                                      | <input type="checkbox"/> Low step<br>Step Height: _____ | <input type="checkbox"/> Unstable surface (e.g. dense foam)  | 6 multi-directional push/pull |                                                                        |            |                            |                              |
| Rapid tap-ups to alternate sides                                        | <input type="checkbox"/> Low step<br>Step Height: _____ | <input type="checkbox"/> Unstable surface (e.g. soccer ball) | 6 multi-directional push/pull |                                                                        |            |                            |                              |
| Rapid stepping forward and backward with right foot, on a thin foam mat | <input type="checkbox"/> Short steps; rest in stance    | <input type="checkbox"/> Long steps                          | 6 multi-directional push/pull |                                                                        |            |                            |                              |
| Rapid stepping forward and backward with left foot, on a thin foam mat  | <input type="checkbox"/> Short steps; rest in stance    | <input type="checkbox"/> Long steps                          | 6 multi-directional push/pull |                                                                        |            |                            |                              |

| <b>Voluntary task</b>                                         | <b>Adaptation to reduce difficulty</b>                  | <b>Adaptation to increase difficulty</b>                     | <b>Perturbation</b>           | <b>Outcome</b><br>(0= $\leq 2$ steps, I=multi step, X=loss of balance) | <b>RPC</b> | <b># Rests during task</b> | <b>Rest after task (Y/N)</b> |
|---------------------------------------------------------------|---------------------------------------------------------|--------------------------------------------------------------|-------------------------------|------------------------------------------------------------------------|------------|----------------------------|------------------------------|
| Rapid tap-ups forward with alternate feet, on a thin foam mat | <input type="checkbox"/> Low step<br>Step Height: _____ | <input type="checkbox"/> Unstable surface (e.g. soccer ball) | 6 multi-directional push/pull |                                                                        |            |                            |                              |
| Rapid step-ups with alternate feet, on a thin foam mat        | <input type="checkbox"/> Low step<br>Step Height: _____ | <input type="checkbox"/> Unstable surface (e.g. dense foam)  | 6 multi-directional push/pull |                                                                        |            |                            |                              |
| Rapid tap-ups to alternate sides, on a thin foam mat          | <input type="checkbox"/> Low step<br>Step Height: _____ | <input type="checkbox"/> Unstable surface (e.g. soccer ball) | 6 multi-directional push/pull |                                                                        |            |                            |                              |

HR: \_\_\_\_\_

BP: \_\_\_\_\_

**Overall rating of perceived challenge:** \_\_\_\_\_

|                        |    |  |  |  |  |
|------------------------|----|--|--|--|--|
| <b>TOTALS/AVERAGES</b> | 0= |  |  |  |  |
|                        | I= |  |  |  |  |
|                        | X= |  |  |  |  |

**Overall comments for the session:** \_\_\_\_\_

\_\_\_\_\_

\_\_\_\_\_

\_\_\_\_\_

**'Quasi-mobile' tasks: Session 5**

|                      |            |                       |            |                       |            |
|----------------------|------------|-----------------------|------------|-----------------------|------------|
| <b>Initial - HR:</b> | <b>BP:</b> | <b>Repeat 1 - HR:</b> | <b>BP:</b> | <b>Repeat 2 - HR:</b> | <b>BP:</b> |
|----------------------|------------|-----------------------|------------|-----------------------|------------|

| <b>Voluntary task</b>                                       | <b>Adaptation to reduce difficulty</b>               | <b>Adaptation to increase difficulty</b>     | <b>Perturbation</b>           | <b>Outcome</b><br>(0= $\leq$ 2 steps, 1=multi step, X=loss of balance) | <b>RPC</b> | <b># Rests during task</b> | <b>Rest after task (Y/N)</b> |
|-------------------------------------------------------------|------------------------------------------------------|----------------------------------------------|-------------------------------|------------------------------------------------------------------------|------------|----------------------------|------------------------------|
| Rapid stepping forward and backward with right foot         | <input type="checkbox"/> Short steps; rest in stance | <input type="checkbox"/> Long steps          | 6 multi-directional push/pull |                                                                        |            |                            |                              |
| Rapid stepping forward and backward with left foot          | <input type="checkbox"/> Short steps; rest in stance | <input type="checkbox"/> Long steps          | 6 multi-directional push/pull |                                                                        |            |                            |                              |
| Rapid stepping to alternate sides                           | <input type="checkbox"/> Short steps                 | <input type="checkbox"/> Long steps          | 6 multi-directional push/pull |                                                                        |            |                            |                              |
| Rapid diagonal forward stepping with alternate feet         | <input type="checkbox"/> Short steps                 | <input type="checkbox"/> Long steps          | 6 multi-directional push/pull |                                                                        |            |                            |                              |
| Walking in place                                            | <input type="checkbox"/> Feet barely off floor       | <input type="checkbox"/> Knees to hip-height | 6 multi-directional push/pull |                                                                        |            |                            |                              |
| Walking in place, eyes closed                               | <input type="checkbox"/> Feet barely off floor       | <input type="checkbox"/> Knees to hip-height | 6 multi-directional push/pull |                                                                        |            |                            |                              |
| Rapid stepping with alternate feet in random cued direction | <input type="checkbox"/> Short steps                 | <input type="checkbox"/> Long steps          | 6 multi-directional push/pull |                                                                        |            |                            |                              |

| <b>Voluntary task</b>                     | <b>Adaptation to reduce difficulty</b>                  | <b>Adaptation to increase difficulty</b>                     | <b>Perturbation</b>           | <b>Outcome</b><br>(0= $\leq$ 2 steps, I=multi step, X=loss of balance) | <b>RPC</b> | <b># Rests during task</b> | <b>Rest after task (Y/N)</b> |
|-------------------------------------------|---------------------------------------------------------|--------------------------------------------------------------|-------------------------------|------------------------------------------------------------------------|------------|----------------------------|------------------------------|
| Rapid step-ups with alternate feet        | <input type="checkbox"/> Low step<br>Step Height: _____ | <input type="checkbox"/> Unstable surface (e.g. dense foam)  | 6 multi-directional push/pull |                                                                        |            |                            |                              |
| Rapid tap-ups forward with alternate feet | <input type="checkbox"/> Low step<br>Step Height: _____ | <input type="checkbox"/> Unstable surface (e.g. soccer ball) | 6 multi-directional push/pull |                                                                        |            |                            |                              |
| Rapid tap-ups to alternate sides          | <input type="checkbox"/> Low step<br>Step Height: _____ | <input type="checkbox"/> Unstable surface (e.g. soccer ball) | 6 multi-directional push/pull |                                                                        |            |                            |                              |

HR: \_\_\_\_\_

BP: \_\_\_\_\_

**Overall rating of perceived challenge:** \_\_\_\_\_

|                        |    |  |  |  |  |
|------------------------|----|--|--|--|--|
| <b>TOTALS/AVERAGES</b> | 0= |  |  |  |  |
|                        | I= |  |  |  |  |
|                        | X= |  |  |  |  |

**Overall comments for the session:** \_\_\_\_\_  
 \_\_\_\_\_  
 \_\_\_\_\_  
 \_\_\_\_\_

**'Quasi-mobile' tasks: Session 6**

|                      |            |                       |            |                       |            |
|----------------------|------------|-----------------------|------------|-----------------------|------------|
| <b>Initial - HR:</b> | <b>BP:</b> | <b>Repeat 1 - HR:</b> | <b>BP:</b> | <b>Repeat 2 - HR:</b> | <b>BP:</b> |
|----------------------|------------|-----------------------|------------|-----------------------|------------|

| <b>Voluntary task</b>                                       | <b>Adaptation to reduce difficulty</b>         | <b>Adaptation to increase difficulty</b>     | <b>Perturbation</b>           | <b>Outcome</b><br>(0= $\leq$ 2 steps, 1=multi step, X=loss of balance) | <b>RPC</b> | <b># Rests during task</b> | <b>Rest after task (Y/N)</b> |
|-------------------------------------------------------------|------------------------------------------------|----------------------------------------------|-------------------------------|------------------------------------------------------------------------|------------|----------------------------|------------------------------|
| Rapid stepping forward with alternate feet                  | <input type="checkbox"/> Short steps           | <input type="checkbox"/> Long steps          | 6 multi-directional push/pull |                                                                        |            |                            |                              |
| Rapid stepping backward with alternate feet                 | <input type="checkbox"/> Short steps           | <input type="checkbox"/> Long steps          | 6 multi-directional push/pull |                                                                        |            |                            |                              |
| Rapid stepping to alternate sides                           | <input type="checkbox"/> Short steps           | <input type="checkbox"/> Long steps          | 6 multi-directional push/pull |                                                                        |            |                            |                              |
| Walking in place, eyes closed                               | <input type="checkbox"/> Feet barely off floor | <input type="checkbox"/> Knees to hip-height | 6 multi-directional push/pull |                                                                        |            |                            |                              |
| 'Jogging' (or fast walking) in place                        | <input type="checkbox"/> Feet barely off floor | <input type="checkbox"/> Knees to hip-height | 6 multi-directional push/pull |                                                                        |            |                            |                              |
| Rapid diagonal forward stepping with alternate feet         | <input type="checkbox"/> Short steps           | <input type="checkbox"/> Long steps          | 6 multi-directional push/pull |                                                                        |            |                            |                              |
| Rapid stepping with alternate feet in random cued direction | <input type="checkbox"/> Short steps           | <input type="checkbox"/> Long steps          | 6 multi-directional push/pull |                                                                        |            |                            |                              |

| <b>Voluntary task</b>                                                           | <b>Adaptation to reduce difficulty</b>         | <b>Adaptation to increase difficulty</b>     | <b>Perturbation</b>           | <b>Outcome</b><br>(0= $\leq$ 2 steps, I=multi step, X=loss of balance) | <b>RPC</b> | <b># Rests during task</b> | <b>Rest after task (Y/N)</b> |
|---------------------------------------------------------------------------------|------------------------------------------------|----------------------------------------------|-------------------------------|------------------------------------------------------------------------|------------|----------------------------|------------------------------|
| 'jogging' (or fast walking) in place, on a thin foam mat                        | <input type="checkbox"/> Feet barely off floor | <input type="checkbox"/> Knees to hip-height | 6 multi-directional push/pull |                                                                        |            |                            |                              |
| Rapid diagonal forward stepping with alternate feet, on a thin foam mat         | <input type="checkbox"/> Short steps           | <input type="checkbox"/> Long steps          | 6 multi-directional push/pull |                                                                        |            |                            |                              |
| Rapid stepping with alternate feet in random cued direction, on a thin foam mat | <input type="checkbox"/> Short steps           | <input type="checkbox"/> Long steps          | 6 multi-directional push/pull |                                                                        |            |                            |                              |

HR: \_\_\_\_\_

BP: \_\_\_\_\_

**Overall rating of perceived challenge:** \_\_\_\_\_

|                        |    |  |  |  |  |
|------------------------|----|--|--|--|--|
| <b>TOTALS/AVERAGES</b> | 0= |  |  |  |  |
|                        | I= |  |  |  |  |
|                        | X= |  |  |  |  |
|                        |    |  |  |  |  |

**Overall comments for the session:** \_\_\_\_\_  
 \_\_\_\_\_  
 \_\_\_\_\_  
 \_\_\_\_\_

**'Mobile' tasks: Session 7**

|                      |            |                       |            |                       |            |
|----------------------|------------|-----------------------|------------|-----------------------|------------|
| <b>Initial - HR:</b> | <b>BP:</b> | <b>Repeat 1 - HR:</b> | <b>BP:</b> | <b>Repeat 2 - HR:</b> | <b>BP:</b> |
|----------------------|------------|-----------------------|------------|-----------------------|------------|

| <b>Voluntary task</b>                                                        | <b>Adaptation to reduce difficulty</b>                        | <b>Adaptation to increase difficulty</b>                                | <b>Perturbation</b>           | <b>Outcome</b><br>(0= $\leq$ 2 steps, 1=multi step, X=loss of balance) | <b>RPC</b> | <b># Rests during task</b> | <b>Rest after task (Y/N)</b> |
|------------------------------------------------------------------------------|---------------------------------------------------------------|-------------------------------------------------------------------------|-------------------------------|------------------------------------------------------------------------|------------|----------------------------|------------------------------|
| Walking forward                                                              | <input type="checkbox"/> Short steps; walk slowly             | <input type="checkbox"/> Long steps; traffic light                      | 6 multi-directional push/pull |                                                                        |            |                            |                              |
| Walking forward, turning head left and right                                 | <input type="checkbox"/> Short steps; walk slowly             | <input type="checkbox"/> Long steps; traffic light                      | 6 multi-directional push/pull |                                                                        |            |                            |                              |
| Walking forward, looking up and down                                         | <input type="checkbox"/> Short steps; walk slowly             | <input type="checkbox"/> Long steps; traffic light                      | 6 multi-directional push/pull |                                                                        |            |                            |                              |
| Walking and stepping over obstacles                                          | <input type="checkbox"/> Low/short obstacles<br>Define: _____ | <input type="checkbox"/> High/long obstacles<br>Define: _____           | 6 multi-directional push/pull |                                                                        |            |                            |                              |
| Forward braiding                                                             | <input type="checkbox"/> Walk on the line                     | <input type="checkbox"/> Step further across; long steps; traffic light | 6 multi-directional push/pull |                                                                        |            |                            |                              |
| Side stepping                                                                | <input type="checkbox"/> Short steps                          | <input type="checkbox"/> Long steps                                     | 6 multi-directional push/pull |                                                                        |            |                            |                              |
| Turning on the spot (alternate between turning to the left and to the right) | <input type="checkbox"/> Turn slowly                          | <input type="checkbox"/> Turn quickly                                   | 6 multi-directional push/pull |                                                                        |            |                            |                              |

| <b>Voluntary task</b>                                                                         | <b>Adaptation to reduce difficulty</b> | <b>Adaptation to increase difficulty</b> | <b>Perturbation</b>           | <b>Outcome</b><br>(0= $\leq 2$ steps, I=multi step, X=loss of balance) | <b>RPC</b> | <b># Rests during task</b> | <b>Rest after task (Y/N)</b> |
|-----------------------------------------------------------------------------------------------|----------------------------------------|------------------------------------------|-------------------------------|------------------------------------------------------------------------|------------|----------------------------|------------------------------|
| Turning on the spot with eyes closed (alternate between turning to the left and to the right) | <input type="checkbox"/> Turn slowly   | <input type="checkbox"/> Turn quickly    | 6 multi-directional push/pull |                                                                        |            |                            |                              |
| Turning on the spot, in cued direction                                                        | <input type="checkbox"/> Turn slowly   | <input type="checkbox"/> Turn quickly    | 6 multi-directional push/pull |                                                                        |            |                            |                              |
| Four square stepping                                                                          | <input type="checkbox"/> Short steps   | <input type="checkbox"/> Long steps      | 6 multi-directional push/pull |                                                                        |            |                            |                              |

HR: \_\_\_\_\_

BP: \_\_\_\_\_

**Overall rating of perceived challenge:** \_\_\_\_\_

|                        |    |  |  |  |  |
|------------------------|----|--|--|--|--|
| <b>TOTALS/AVERAGES</b> | 0= |  |  |  |  |
|                        | I= |  |  |  |  |
|                        | X= |  |  |  |  |
|                        |    |  |  |  |  |

**Overall comments for the session:** \_\_\_\_\_  
 \_\_\_\_\_  
 \_\_\_\_\_  
 \_\_\_\_\_



**'Mobile' tasks: Session 8**

|                      |            |                       |            |                       |            |
|----------------------|------------|-----------------------|------------|-----------------------|------------|
| <b>Initial - HR:</b> | <b>BP:</b> | <b>Repeat 1 - HR:</b> | <b>BP:</b> | <b>Repeat 2 - HR:</b> | <b>BP:</b> |
|----------------------|------------|-----------------------|------------|-----------------------|------------|

| <b>Voluntary task</b>            | <b>Adaptation to reduce difficulty</b>                        | <b>Adaptation to increase difficulty</b>                      | <b>Perturbation</b>           | <b>Outcome</b><br>(0= $\leq$ 2 steps, 1=multi step, X=loss of balance) | <b>RPC</b> | <b># Rests during task</b> | <b>Rest after task (Y/N)</b> |
|----------------------------------|---------------------------------------------------------------|---------------------------------------------------------------|-------------------------------|------------------------------------------------------------------------|------------|----------------------------|------------------------------|
| Walking forward                  | <input type="checkbox"/> Short steps; walk slowly             | <input type="checkbox"/> Long steps; traffic light            | 6 multi-directional push/pull |                                                                        |            |                            |                              |
| Walking backward                 | <input type="checkbox"/> Short steps; walk slowly             | <input type="checkbox"/> Long steps; traffic light            | 6 multi-directional push/pull |                                                                        |            |                            |                              |
| Walking forward with eyes closed | <input type="checkbox"/> Short steps; walk slowly             | <input type="checkbox"/> Long steps; walk quickly             | 6 multi-directional push/pull |                                                                        |            |                            |                              |
| Tandem walking forward           | <input type="checkbox"/> Not heel-toe; steps close to line    | <input type="checkbox"/> Traffic light                        | 6 multi-directional push/pull |                                                                        |            |                            |                              |
| Side stepping                    | <input type="checkbox"/> Short steps                          | <input type="checkbox"/> Long steps                           | 6 multi-directional push/pull |                                                                        |            |                            |                              |
| Sideways braiding                | <input type="checkbox"/> Steps not fully crossed              | <input type="checkbox"/> Traffic light                        | 6 multi-directional push/pull |                                                                        |            |                            |                              |
| Side stepping over obstacles     | <input type="checkbox"/> Low/short obstacles<br>Define: _____ | <input type="checkbox"/> High/long obstacles<br>Define: _____ | 6 multi-directional push/pull |                                                                        |            |                            |                              |

| <b>Voluntary task</b>                                                        | <b>Adaptation to reduce difficulty</b> | <b>Adaptation to increase difficulty</b> | <b>Perturbation</b>           | <b>Outcome</b><br>(0= $\leq$ 2 steps, I=multi step, X=loss of balance) | <b>RPC</b> | <b># Rests during task</b> | <b>Rest after task (Y/N)</b> |
|------------------------------------------------------------------------------|----------------------------------------|------------------------------------------|-------------------------------|------------------------------------------------------------------------|------------|----------------------------|------------------------------|
| Turning on the spot (alternate between turning to the left and to the right) | <input type="checkbox"/> Turn slowly   | <input type="checkbox"/> Turn quickly    | 6 multi-directional push/pull |                                                                        |            |                            |                              |
| Turning on the spot in cued direction                                        | <input type="checkbox"/> Turn slowly   | <input type="checkbox"/> Turn quickly    | 6 multi-directional push/pull |                                                                        |            |                            |                              |
| Four square stepping                                                         | <input type="checkbox"/> Short steps   | <input type="checkbox"/> Long steps      | 6 multi-directional push/pull |                                                                        |            |                            |                              |

HR: \_\_\_\_\_

BP: \_\_\_\_\_

**Overall rating of perceived challenge:** \_\_\_\_\_

|                        |    |  |  |  |  |
|------------------------|----|--|--|--|--|
| <b>TOTALS/AVERAGES</b> | 0= |  |  |  |  |
|                        | I= |  |  |  |  |
|                        | X= |  |  |  |  |
|                        |    |  |  |  |  |

**Overall comments for the session:** \_\_\_\_\_  
 \_\_\_\_\_  
 \_\_\_\_\_  
 \_\_\_\_\_

**'Mobile' Tasks: Session 9**

|                      |            |                       |            |                       |            |
|----------------------|------------|-----------------------|------------|-----------------------|------------|
| <b>Initial - HR:</b> | <b>BP:</b> | <b>Repeat 1 - HR:</b> | <b>BP:</b> | <b>Repeat 2 - HR:</b> | <b>BP:</b> |
|----------------------|------------|-----------------------|------------|-----------------------|------------|

| <b>Voluntary task</b>                   | <b>Adaptation to reduce difficulty</b>                     | <b>Adaptation to increase difficulty</b>           | <b>Perturbation</b>           | <b>Outcome</b><br>(0= $\leq$ 2 steps, 1=multi step, X=loss of balance) | <b>RPC</b> | <b># Rests during task</b> | <b>Rest after task (Y/N)</b> |
|-----------------------------------------|------------------------------------------------------------|----------------------------------------------------|-------------------------------|------------------------------------------------------------------------|------------|----------------------------|------------------------------|
| Walking forward on a thin foam mat      | <input type="checkbox"/> Short steps; walk slowly          | <input type="checkbox"/> Long steps; traffic light | 6 multi-directional push/pull |                                                                        |            |                            |                              |
| Walking backward on a thin foam mat     | <input type="checkbox"/> Short steps; walk slowly          | <input type="checkbox"/> Long steps; traffic light | 6 multi-directional push/pull |                                                                        |            |                            |                              |
| Side stepping on a thin foam mat        | <input type="checkbox"/> Short steps                       | <input type="checkbox"/> Long steps                | 6 multi-directional push/pull |                                                                        |            |                            |                              |
| Four square stepping on a thin foam mat | <input type="checkbox"/> Short steps                       | <input type="checkbox"/> Long steps                | 6 multi-directional push/pull |                                                                        |            |                            |                              |
| Tandem walking forward                  | <input type="checkbox"/> Not heel-toe; steps close to line | <input type="checkbox"/> Traffic light             | 6 multi-directional push/pull |                                                                        |            |                            |                              |
| Tandem walking backward                 | <input type="checkbox"/> Not heel-toe; steps close to line | <input type="checkbox"/> Traffic light             | 6 multi-directional push/pull |                                                                        |            |                            |                              |
| Sideways braiding                       | <input type="checkbox"/> Steps not fully crossed           | <input type="checkbox"/> Traffic light             | 6 multi-directional push/pull |                                                                        |            |                            |                              |

| <b>Voluntary task</b>                                                                         | <b>Adaptation to reduce difficulty</b>            | <b>Adaptation to increase difficulty</b>                                | <b>Perturbation</b>           | <b>Outcome</b><br>(0= $\leq$ 2 steps, I=multi step, X=loss of balance) | <b>RPC</b> | <b># Rests during task</b> | <b>Rest after task (Y/N)</b> |
|-----------------------------------------------------------------------------------------------|---------------------------------------------------|-------------------------------------------------------------------------|-------------------------------|------------------------------------------------------------------------|------------|----------------------------|------------------------------|
| Turning on the spot with eyes closed (alternate between turning to the left and to the right) | <input type="checkbox"/> Turn slowly              | <input type="checkbox"/> Turn quickly                                   | 6 multi-directional push/pull |                                                                        |            |                            |                              |
| Forward braiding                                                                              | <input type="checkbox"/> Walk on the line         | <input type="checkbox"/> Step further across; long steps; traffic light | 6 multi-directional push/pull |                                                                        |            |                            |                              |
| Walking forward with eyes closed                                                              | <input type="checkbox"/> Short steps; walk slowly | <input type="checkbox"/> Long steps; walk quickly                       | 6 multi-directional push/pull |                                                                        |            |                            |                              |

HR: \_\_\_\_\_

BP: \_\_\_\_\_

**Overall rating of perceived challenge:** \_\_\_\_\_

|                        |    |  |  |  |  |
|------------------------|----|--|--|--|--|
| <b>TOTALS/AVERAGES</b> | 0= |  |  |  |  |
|                        | I= |  |  |  |  |
|                        | X= |  |  |  |  |

**Overall comments for the session:** \_\_\_\_\_

\_\_\_\_\_

\_\_\_\_\_

\_\_\_\_\_

**'Mobile' tasks: Session 10**

|                      |            |                       |            |                       |            |
|----------------------|------------|-----------------------|------------|-----------------------|------------|
| <b>Initial - HR:</b> | <b>BP:</b> | <b>Repeat 1 - HR:</b> | <b>BP:</b> | <b>Repeat 2 - HR:</b> | <b>BP:</b> |
|----------------------|------------|-----------------------|------------|-----------------------|------------|

| <b>Voluntary task</b>                      | <b>Adaptation to reduce difficulty</b>                     | <b>Adaptation to increase difficulty</b>                                | <b>Perturbation</b>           | <b>Outcome</b><br>(0= $\leq$ 2 steps, 1=multi step, X=loss of balance) | <b>RPC</b> | <b># Rests during task</b> | <b>Rest after task (Y/N)</b> |
|--------------------------------------------|------------------------------------------------------------|-------------------------------------------------------------------------|-------------------------------|------------------------------------------------------------------------|------------|----------------------------|------------------------------|
| Tandem walking forward                     | <input type="checkbox"/> Not heel-toe; steps close to line | <input type="checkbox"/> Traffic light                                  | 6 multi-directional push/pull |                                                                        |            |                            |                              |
| Tandem walking backward                    | <input type="checkbox"/> Not heel-toe; steps close to line | <input type="checkbox"/> Traffic light                                  | 6 multi-directional push/pull |                                                                        |            |                            |                              |
| Forward braiding                           | <input type="checkbox"/> Walk on the line                  | <input type="checkbox"/> Step further across; long steps; traffic light | 6 multi-directional push/pull |                                                                        |            |                            |                              |
| Backward braiding                          | <input type="checkbox"/> Walk on the line                  | <input type="checkbox"/> Step further across; long steps; traffic light | 6 multi-directional push/pull |                                                                        |            |                            |                              |
| Tandem walking forward on a thin foam mat  | <input type="checkbox"/> Not heel-toe; steps close to line | <input type="checkbox"/> Traffic light                                  | 6 multi-directional push/pull |                                                                        |            |                            |                              |
| Tandem walking backward on a thin foam mat | <input type="checkbox"/> Not heel-toe; steps close to line | <input type="checkbox"/> Traffic light                                  | 6 multi-directional push/pull |                                                                        |            |                            |                              |
| Forward braiding on a thin foam mat        | <input type="checkbox"/> Walk on the line                  | <input type="checkbox"/> Step further across; long steps; traffic light | 6 multi-directional push/pull |                                                                        |            |                            |                              |

| <b>Voluntary task</b>                                  | <b>Adaptation to reduce difficulty</b>           | <b>Adaptation to increase difficulty</b>                                | <b>Perturbation</b>           | <b>Outcome</b><br>(0= $\leq 2$ steps, I=multi step, X=loss of balance) | <b>RPC</b> | <b># Rests during task</b> | <b>Rest after task (Y/N)</b> |
|--------------------------------------------------------|--------------------------------------------------|-------------------------------------------------------------------------|-------------------------------|------------------------------------------------------------------------|------------|----------------------------|------------------------------|
| Backward braiding on a thin foam mat                   | <input type="checkbox"/> Walk on the line        | <input type="checkbox"/> Step further across; long steps; traffic light | 6 multi-directional push/pull |                                                                        |            |                            |                              |
| Sideways braiding on a thin foam mat                   | <input type="checkbox"/> Steps not fully crossed | <input type="checkbox"/> Traffic light                                  | 6 multi-directional push/pull |                                                                        |            |                            |                              |
| Turning on the spot with eyes closed in cued direction | <input type="checkbox"/> Turn slowly             | <input type="checkbox"/> Turn quickly                                   | 6 multi-directional push/pull |                                                                        |            |                            |                              |

HR: \_\_\_\_\_

BP: \_\_\_\_\_

**Overall rating of perceived challenge:** \_\_\_\_\_

|                        |    |  |  |  |  |
|------------------------|----|--|--|--|--|
| <b>TOTALS/AVERAGES</b> | 0= |  |  |  |  |
|                        | 1= |  |  |  |  |
|                        | X= |  |  |  |  |

**Overall comments for the session:** \_\_\_\_\_  
 \_\_\_\_\_  
 \_\_\_\_\_  
 \_\_\_\_\_

**'Mobile & Unpredictable' Tasks: Session 11**

|                      |            |                       |            |                       |            |
|----------------------|------------|-----------------------|------------|-----------------------|------------|
| <b>Initial - HR:</b> | <b>BP:</b> | <b>Repeat 1 - HR:</b> | <b>BP:</b> | <b>Repeat 2 - HR:</b> | <b>BP:</b> |
|----------------------|------------|-----------------------|------------|-----------------------|------------|

| <b>Voluntary task</b>                                          | <b>Adaptation to reduce difficulty</b> | <b>Adaptation to increase difficulty</b>                                               | <b>Perturbation</b>                                           | <b>Outcome</b><br>(0= $\leq 2$ steps, 1=multi step, X=loss of balance) | <b>RPC</b> | <b># Rests during task</b> | <b>Rest after task (Y/N)</b> |
|----------------------------------------------------------------|----------------------------------------|----------------------------------------------------------------------------------------|---------------------------------------------------------------|------------------------------------------------------------------------|------------|----------------------------|------------------------------|
| Kicking soccer ball against wall                               | [none]                                 | <input type="checkbox"/> Stand further from wall; kick outside BOS; kick with each leg | 6 perturbations: PT attempts to take ball, nudges participant |                                                                        |            |                            |                              |
| Throwing hand ball against a wall                              | <input type="checkbox"/> Large ball    | <input type="checkbox"/> Small ball; stand further from wall; throw with each arm      | 6 perturbations: PT attempts to take ball, nudges participant |                                                                        |            |                            |                              |
| Kicking soccer ball against wall, standing on a thin foam mat  | [none]                                 | <input type="checkbox"/> Stand further from wall; kick outside BOS; kick with each leg | 6 perturbations: PT attempts to take ball, nudges participant |                                                                        |            |                            |                              |
| Throwing hand ball against a wall, standing on a thin foam mat | <input type="checkbox"/> Large ball    | <input type="checkbox"/> Small ball; stand further from wall; throw with each arm      | 6 perturbations: PT attempts to take ball, nudges participant |                                                                        |            |                            |                              |
| Walking with sudden stops and changes in direction             | <input type="checkbox"/> Walk slowly   | <input type="checkbox"/> Walk quickly                                                  | 6 multi-directional push/pull/trip                            |                                                                        |            |                            |                              |
| Move to different corners of the room                          | <input type="checkbox"/> Walk slowly   | <input type="checkbox"/> Walk quickly                                                  | 6 multi-directional push/pull/trip                            |                                                                        |            |                            |                              |

| <b>Voluntary task</b>                                                         | <b>Adaptation to reduce difficulty</b>             | <b>Adaptation to increase difficulty</b>             | <b>Perturbation</b>                 | <b>Outcome</b><br>(0= $\leq$ 2 steps, I=multi step, X=loss of balance) | <b>RPC</b> | <b># Rests during task</b> | <b>Rest after task (Y/N)</b> |
|-------------------------------------------------------------------------------|----------------------------------------------------|------------------------------------------------------|-------------------------------------|------------------------------------------------------------------------|------------|----------------------------|------------------------------|
| Walking with sudden stops and changes in direction, obstacles around the room | <input type="checkbox"/> Walk slowly               | <input type="checkbox"/> Walk quickly                | 6 multi-directional push/pull/trip  |                                                                        |            |                            |                              |
| Move to different corners of the room, obstacles around the room              | <input type="checkbox"/> Walk slowly               | <input type="checkbox"/> Walk quickly                | 6 multi-directional push/pull/trip  |                                                                        |            |                            |                              |
| Four square stepping to unpredictable cued direction                          | <input type="checkbox"/> Short steps               | <input type="checkbox"/> Long steps                  | 12 multi-directional push/pull/trip |                                                                        |            |                            |                              |
| 'Dodgeball'                                                                   | <input type="checkbox"/> Ball thrown at upper body | <input type="checkbox"/> Ball thrown rapidly at feet | internal                            |                                                                        |            |                            |                              |

HR: \_\_\_\_\_

BP: \_\_\_\_\_

**Overall rating of perceived challenge:** \_\_\_\_\_

|                        |    |  |  |  |  |
|------------------------|----|--|--|--|--|
| <b>TOTALS/AVERAGES</b> | 0= |  |  |  |  |
|                        | I= |  |  |  |  |
|                        | X= |  |  |  |  |

**Overall comments for the session:** \_\_\_\_\_

\_\_\_\_\_

\_\_\_\_\_

\_\_\_\_\_



**'Mobile & unpredictable' tasks: Session 12**

|                      |            |                       |            |                       |            |
|----------------------|------------|-----------------------|------------|-----------------------|------------|
| <b>Initial - HR:</b> | <b>BP:</b> | <b>Repeat 1 - HR:</b> | <b>BP:</b> | <b>Repeat 2 - HR:</b> | <b>BP:</b> |
|----------------------|------------|-----------------------|------------|-----------------------|------------|

| <b>Voluntary task</b>                                                         | <b>Adaptation to reduce difficulty</b>               | <b>Adaptation to increase difficulty</b>               | <b>Perturbation</b>                 | <b>Outcome</b><br>(0= $\leq$ 2 steps, 1=multi step, X=loss of balance) | <b>RPC</b> | <b># Rests during task</b> | <b>Rest after task (Y/N)</b> |
|-------------------------------------------------------------------------------|------------------------------------------------------|--------------------------------------------------------|-------------------------------------|------------------------------------------------------------------------|------------|----------------------------|------------------------------|
| Kicking soccer ball back and forth with physiotherapist                       | <input type="checkbox"/> Within reach; kicked slowly | <input type="checkbox"/> Step to reach; kicked quickly | internal                            |                                                                        |            |                            |                              |
| Throwing ball back and forth with physiotherapist                             | <input type="checkbox"/> Large ball; within reach    | <input type="checkbox"/> Small ball; step to reach     | internal                            |                                                                        |            |                            |                              |
| Kicking soccer ball with physiotherapist, standing on a thin foam mat         | <input type="checkbox"/> Within reach; kicked slowly | <input type="checkbox"/> Step to reach; kicked quickly | internal                            |                                                                        |            |                            |                              |
| Throwing ball with physiotherapist, standing on a thin foam mat               | <input type="checkbox"/> Large ball; within reach    | <input type="checkbox"/> Small ball; step to reach     | internal                            |                                                                        |            |                            |                              |
| Walking with sudden stops and changes in direction                            | <input type="checkbox"/> Walk slowly                 | <input type="checkbox"/> Walk quickly                  | 12 multi-directional push/pull/trip |                                                                        |            |                            |                              |
| Move to different corners of the room                                         | <input type="checkbox"/> Walk slowly                 | <input type="checkbox"/> Walk quickly                  | 12 multi-directional push/pull/trip |                                                                        |            |                            |                              |
| Walking with sudden stops and changes in direction, obstacles around the room | <input type="checkbox"/> Walk slowly                 | <input type="checkbox"/> Walk quickly                  | 12 multi-directional push/pull/trip |                                                                        |            |                            |                              |

| <b>Voluntary task</b>                                            | <b>Adaptation to reduce difficulty</b>             | <b>Adaptation to increase difficulty</b>             | <b>Perturbation</b>                 | <b>Outcome</b><br>(0= $\leq 2$ steps, I=multi step, X=loss of balance) | <b>RPC</b> | <b># Rests during task</b> | <b>Rest after task (Y/N)</b> |
|------------------------------------------------------------------|----------------------------------------------------|------------------------------------------------------|-------------------------------------|------------------------------------------------------------------------|------------|----------------------------|------------------------------|
| Move to different corners of the room, obstacles around the room | <input type="checkbox"/> Walk slowly               | <input type="checkbox"/> Walk quickly                | 12 multi-directional push/pull/trip |                                                                        |            |                            |                              |
| Four square stepping to unpredictable cued direction             | <input type="checkbox"/> Short steps               | <input type="checkbox"/> Long steps                  | 12 multi-directional push/pull/trip |                                                                        |            |                            |                              |
| 'Dodgeball'                                                      | <input type="checkbox"/> Ball thrown at upper body | <input type="checkbox"/> Ball thrown rapidly at feet | internal                            |                                                                        |            |                            |                              |

HR: \_\_\_\_\_

BP: \_\_\_\_\_

**Overall rating of perceived challenge:** \_\_\_\_\_

|                        |    |  |  |  |  |
|------------------------|----|--|--|--|--|
| <b>TOTALS/AVERAGES</b> | 0= |  |  |  |  |
|                        | I= |  |  |  |  |
|                        | X= |  |  |  |  |

**Overall comments for the session:** \_\_\_\_\_  
 \_\_\_\_\_  
 \_\_\_\_\_  
 \_\_\_\_\_

**Booster sessions**

|                      |            |                       |            |                       |            |
|----------------------|------------|-----------------------|------------|-----------------------|------------|
| <b>Initial - HR:</b> | <b>BP:</b> | <b>Repeat 1 - HR:</b> | <b>BP:</b> | <b>Repeat 2 - HR:</b> | <b>BP:</b> |
|----------------------|------------|-----------------------|------------|-----------------------|------------|

| <b>Voluntary task</b>                                       | <b>Adaptation to reduce difficulty</b>                  | <b>Adaptation to increase difficulty</b>                     | <b>Perturbation</b>                  | <b>Outcome</b><br>(0= $\leq$ 2 steps, 1=multi step, X=loss of balance) | <b>RPC</b> | <b># Rests during task</b> | <b>Rest after task (Y/N)</b> |
|-------------------------------------------------------------|---------------------------------------------------------|--------------------------------------------------------------|--------------------------------------|------------------------------------------------------------------------|------------|----------------------------|------------------------------|
| Standing still with feet hip-width apart, eyes closed       | <input type="checkbox"/> Wide base of support           | <input type="checkbox"/> Feet together                       | 6 multi-directional lean-and-release |                                                                        |            |                            |                              |
| Rapid tap-ups forward with alternate feet                   | <input type="checkbox"/> Low step<br>Step Height: _____ | <input type="checkbox"/> Unstable surface (e.g. soccer ball) | 6 multi-directional push/pull        |                                                                        |            |                            |                              |
| Rapid tap-ups to alternate sides                            | <input type="checkbox"/> Low step<br>Step Height: _____ | <input type="checkbox"/> Unstable surface (e.g. soccer ball) | 6 multi-directional push/pull        |                                                                        |            |                            |                              |
| Rapid stepping with alternate feet in random cued direction | <input type="checkbox"/> Short steps                    | <input type="checkbox"/> Long steps                          | 6 multi-directional push/pull        |                                                                        |            |                            |                              |
| Turning on the spot, in cued direction                      | <input type="checkbox"/> Turn slowly                    | <input type="checkbox"/> Turn quickly; eyes closed           | 6 multi-directional push/pull        |                                                                        |            |                            |                              |
| Side stepping/braiding                                      | <input type="checkbox"/> Short steps                    | <input type="checkbox"/> Long steps; thin foam mat           | 6 multi-directional push/pull/trip   |                                                                        |            |                            |                              |
| Forward tandem/braiding                                     | <input type="checkbox"/> Steps close to line            | <input type="checkbox"/> Long steps; thin foam mat           | 6 multi-directional push/pull/trip   |                                                                        |            |                            |                              |

| <b>Voluntary task</b>                                                         | <b>Adaptation to reduce difficulty</b>       | <b>Adaptation to increase difficulty</b>                    | <b>Perturbation</b>                                           | <b>Outcome</b><br>(0= $\leq$ 2 steps, I=multi step, X=loss of balance) | <b>RPC</b> | <b># Rests during task</b> | <b>Rest after task (Y/N)</b> |
|-------------------------------------------------------------------------------|----------------------------------------------|-------------------------------------------------------------|---------------------------------------------------------------|------------------------------------------------------------------------|------------|----------------------------|------------------------------|
| Backward tandem/braiding                                                      | <input type="checkbox"/> Steps close to line | <input type="checkbox"/> Long steps; thin foam mat          | 6 multi-directional push/pull/trip                            |                                                                        |            |                            |                              |
| Walking with sudden stops and changes in direction, obstacles around the room | <input type="checkbox"/> Walk slowly         | <input type="checkbox"/> Walk quickly                       | 6 multi-directional push/pull/trip                            |                                                                        |            |                            |                              |
| Kicking soccer ball against wall                                              | [none]                                       | <input type="checkbox"/> Kick outside BOS; on thin foam mat | 6 perturbations: PT attempts to take ball, nudges participant |                                                                        |            |                            |                              |

HR: \_\_\_\_\_

BP: \_\_\_\_\_

**Overall rating of perceived challenge:** \_\_\_\_\_

|                        |    |  |  |  |  |
|------------------------|----|--|--|--|--|
| <b>TOTALS/AVERAGES</b> | 0= |  |  |  |  |
|                        | 1= |  |  |  |  |
|                        | X= |  |  |  |  |

**Overall comments for the session:** \_\_\_\_\_  
 \_\_\_\_\_  
 \_\_\_\_\_  
 \_\_\_\_\_

## 5. TASK DESCRIPTIONS

### Types of external perturbations

#### 1) Lean and release

**a. Forward-directed lean-and-release perturbation.** The participant stands facing the physiotherapist, leaning forward with some of his body weight supported by the physiotherapist. He should be leaning far enough forward that his shoulders and hips are ahead of his toes; however, smaller lean angles can be used with more impaired individuals. The physiotherapist's hands are on the participants' shoulders. At an unexpected time, the physiotherapist releases her hands and the participant starts to fall forward, requiring a step to regain stability. The goal is for the participant to take as few steps as possible to recover.

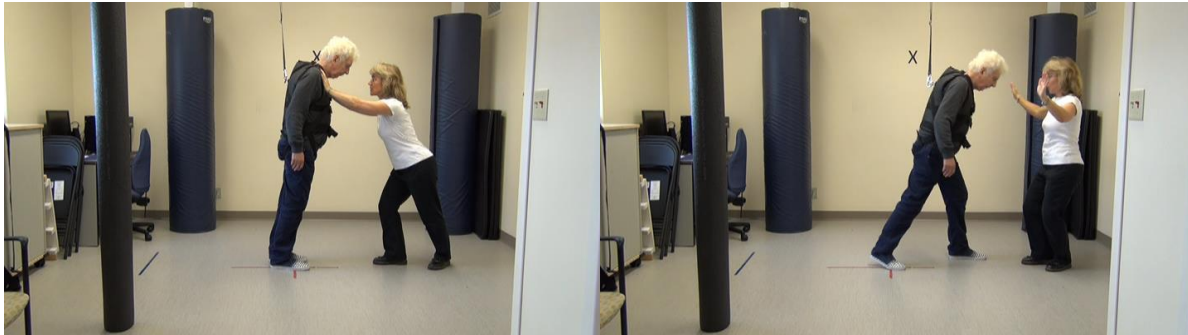

**Figure 6.1. Forward-directed lean-and-release perturbation.** The participant leans forward and the physiotherapist supports his weight (left). The physiotherapist releases her support and the participant steps to recover his balance (right).

**b. Backward-directed lean-and-release perturbation.** The participant stands in front of and facing away from the physiotherapist, leaning backward with some of his body weight supported by the physiotherapist. He should be leaning far enough backward that his shoulders and hips are behind his heels; however, smaller lean angles can be used with more impaired individuals. The physiotherapist's hands are on the participants' shoulders. At an unexpected time, the physiotherapist releases her hands and the participant starts to fall backward, requiring a step to regain stability. The goal is for the participant to take as few steps as possible to recover upright standing balance.

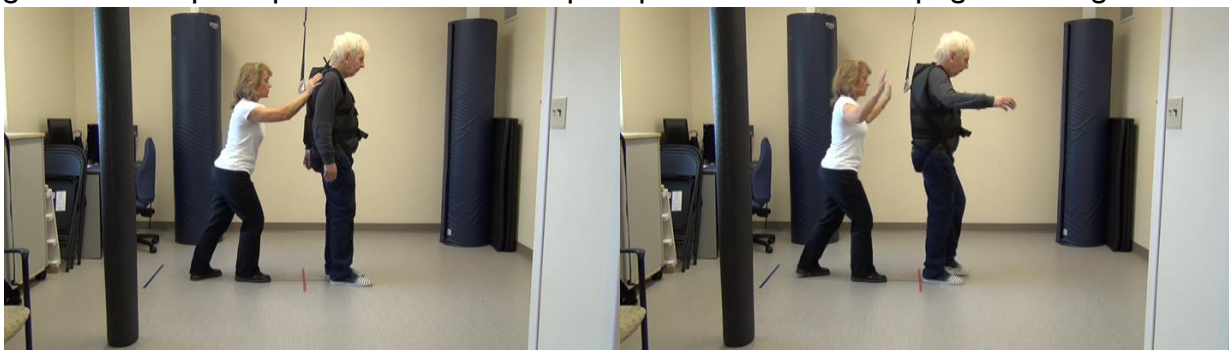

**Figure 6.2. Backward-directed lean-and-release perturbation.** The participant leans backward and the physiotherapist supports his weight (left). The physiotherapist releases her support and the participant steps to recover his balance (right).

**c. Lateral-directed lean-and-release perturbation.** The participant stands with his feet close together, leaning to the right (or left) with some of his body weight supported by the physiotherapist's hands. He should be leaning far enough to the right (or left) that the midline of the pelvis is aligned over the right (or left) foot; however, smaller lean angles can be used with more impaired individuals. The physiotherapist's hands are on the participant's right (or left) shoulder and

right (or left) hip. At an unexpected time, the physiotherapist releases her hands and the participant starts to fall to the right (or left), requiring a step to regain stability. The goal is for the participant to take as few steps as possible to recover balance.

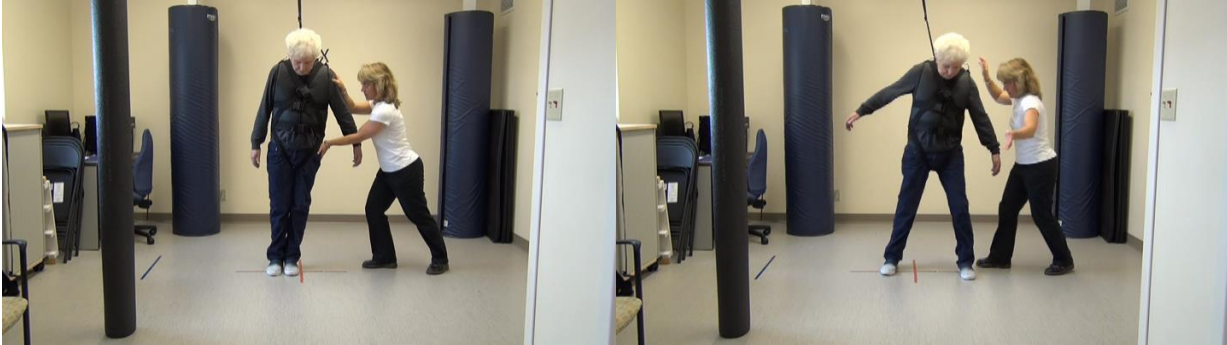

**Figure 6.3. Backward-directed lean-and-release perturbation.** The participant leans to the left and the physiotherapist supports his weight (left). The physiotherapist releases her support and the participant steps to recover his balance (right).

## 2) Multi-directional push/pull/trip

**a. Multidirectional push.** The physiotherapist places her hands on the participant's hips or shoulders and pushes him forward, requiring a reactive step to regain stability. Alternatively, one of the physiotherapist's hands could be on the hip and the other on the shoulder; a push forward at the level of one scapula would facilitate a diagonal reactive step. In all scenarios, the physiotherapist should be ready to assist with the recovery, if necessary, by having a light hold of the safety harness. The physiotherapist should only provide assistance if the participant is unable to regain stability independently; this is true with every reaction. Note that backward-directed pushes are not performed.

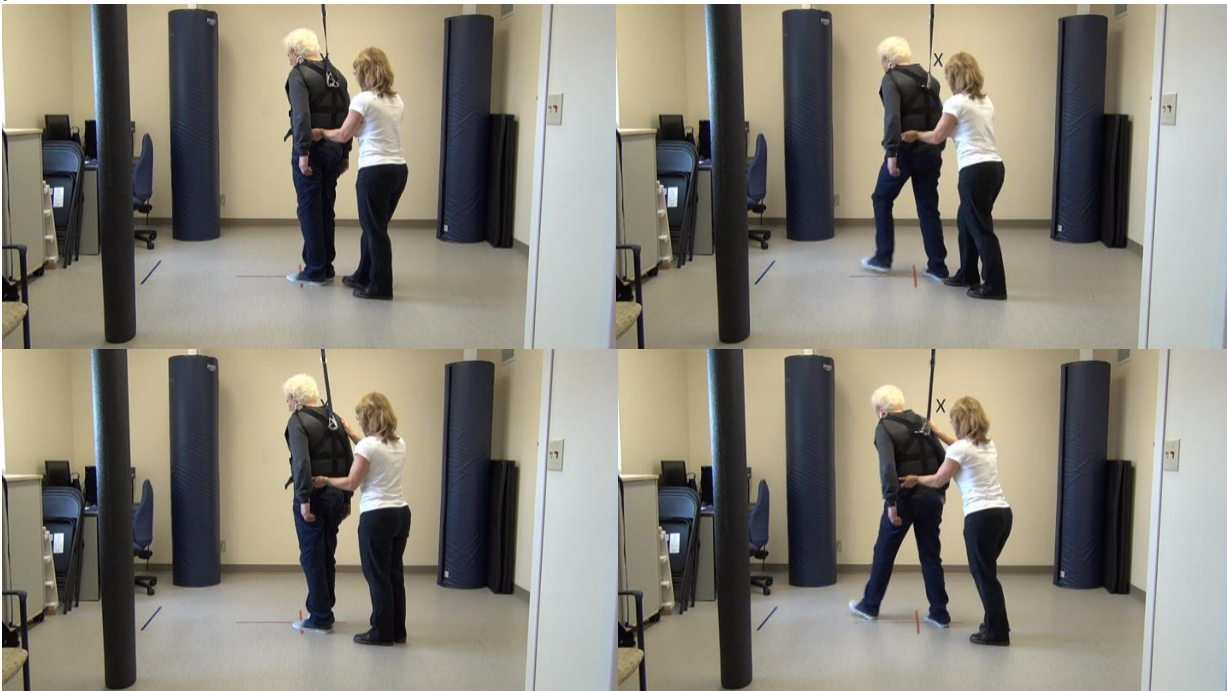

**Figure 6.4. Forward-directed push perturbation.** The physiotherapists' hands may be placed at the hips (top images) or with one hand on the hips and one on the shoulders.



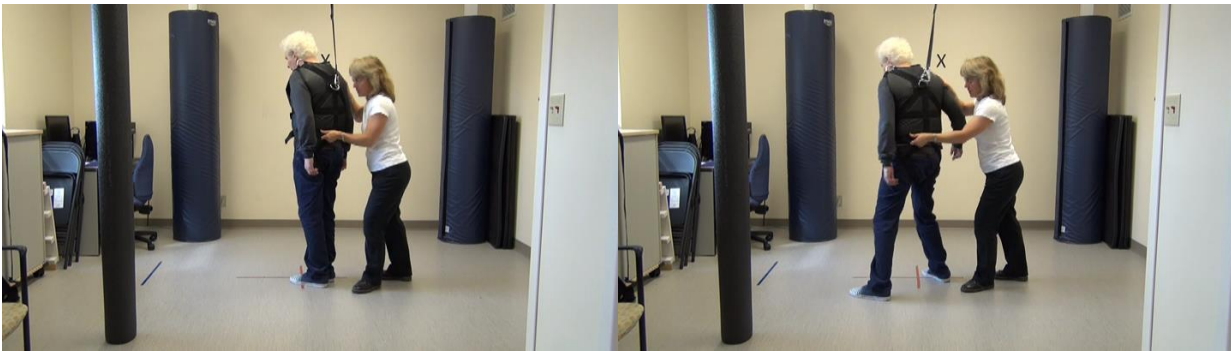

**Figure 6.5. Lateral-directed push perturbation.** The physiotherapist places her hands on the participant's right (or left) hip or shoulder and pushes him to the left (or right), requiring a reactive step to regain stability.

**b. Multi-directional pull perturbation.** The physiotherapist may pull the participant's shoulders or pull on the harness to cause the participant to start to fall forward, requiring a reactive step to regain stability.

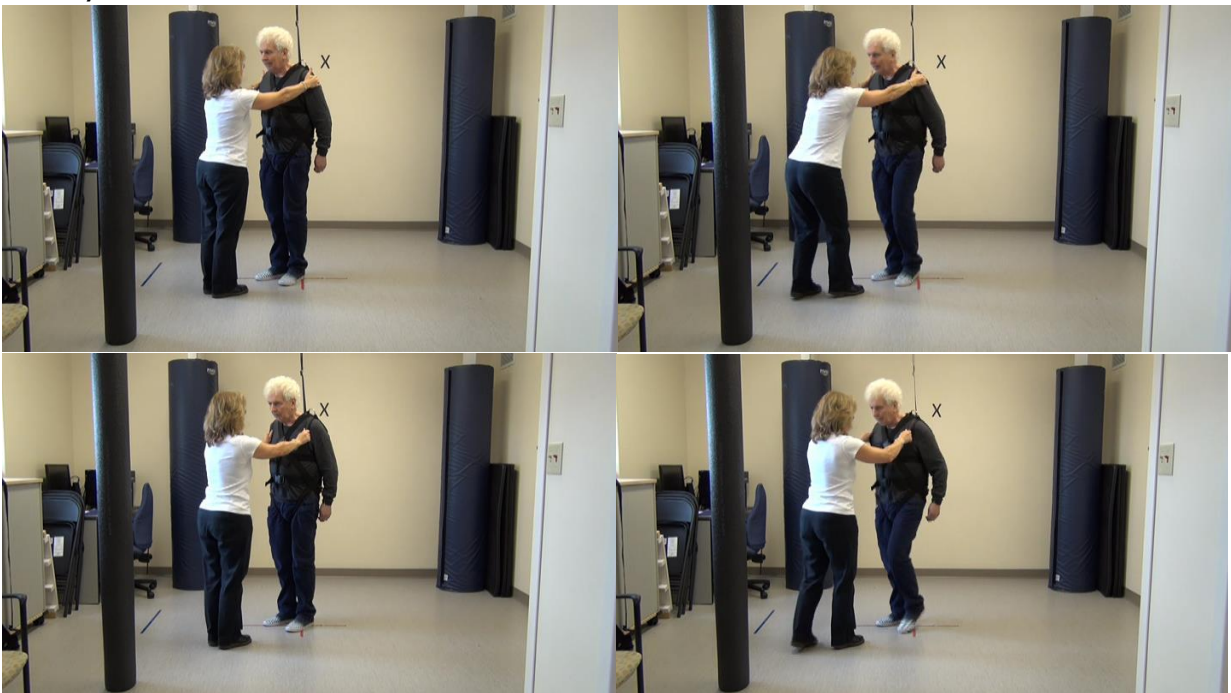

**Figure 6.6. Forward-directed pull perturbation.** The physiotherapist places her hands on the participant's shoulders (top) or pulls on the harness (bottom).

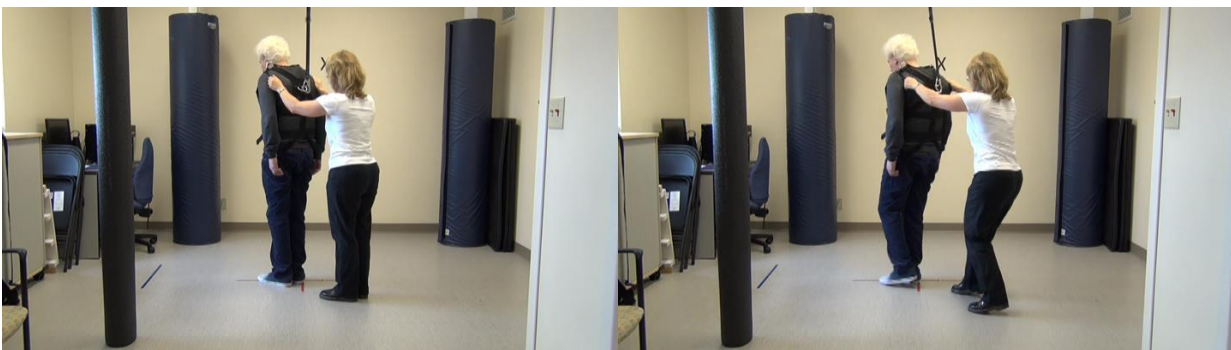

**Figure 6.7. Backward-directed pull perturbation.** The physiotherapist uses the shoulders, hips, or harness to pull the participant backward, requiring a reactive step to regain stability.

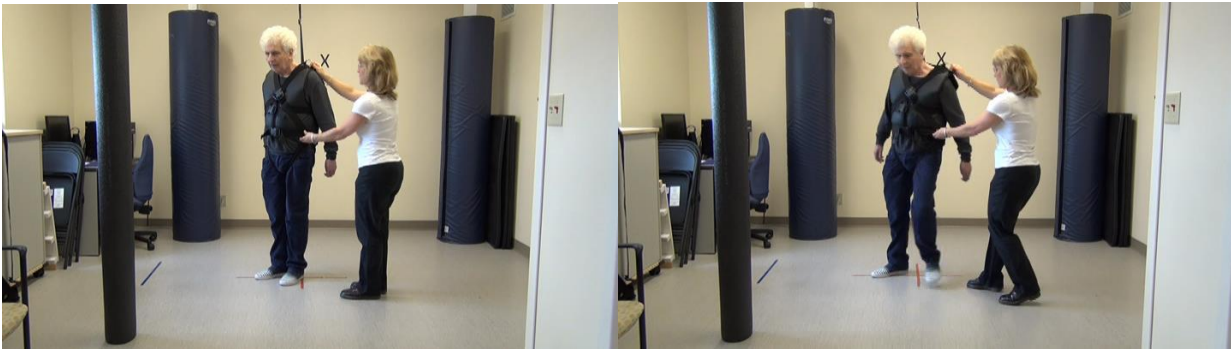

**Figure 6.8. Lateral-directed pull perturbation.** The physiotherapist uses the shoulders, hips or harness, to pull the participant to the right (or left), requiring a reactive step to regain stability.

**c. Trip perturbation while walking.** As the participant walks (forward, backward, sideways), the physiotherapist places her foot in the path of the swing limb causing a trip. A reactive step is required to regain stability. A second person is recommended in this scenario as it is difficult for the physiotherapist doing the tripping to be in a place to provide support should it be needed.

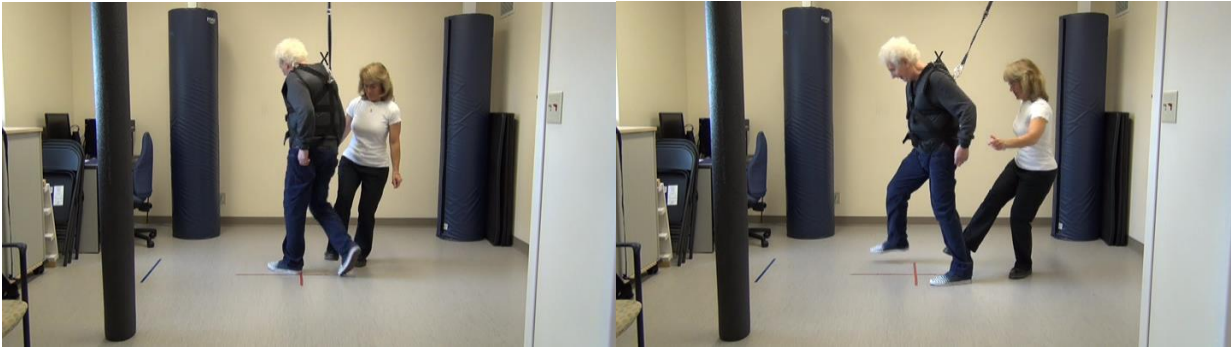

**Figure 6.9. Trip perturbation.** The physiotherapist catches the participants' limb with her foot while walking.

## Descriptions of voluntary tasks

**Standing still with feet hip-width apart** – participant stands unassisted with the eyes open and the feet positioned as wide as the hips. The lean-and-release perturbations are performed in random directions (forward, backward and lateral).

Adaptation to reduce difficulty – have participant adopt a wider base of support (BOS)

Adaptation to increase difficulty – have participant stand with the feet together

Progressions of this task:

Eyes closed – if participant is unable, the lights in the room should be dimmed (alternatively, dark sunglasses may be worn)

Standing on a thin foam mat

Standing on a thick foam mat

Turning head to the right and left – to spot a target

Looking up and down – to spot a target

Counting backwards by 3's – from a random number given by physiotherapist

Eyes closed and counting backwards – as written above, but combined

**Rapid weight-shifting left and right** – participant shifts his body weight from one foot to the other as quickly as possible, and the feet remain in contact with the floor. The task is repeated until all perturbations are accomplished.

Adaptation to reduce difficulty – have participant adopt a wider BOS



Adaptation to increase difficulty – have participant stand with the feet together

**Rapid weight-shifting forward and backward** –participant stands with feet either ‘side-by-side’ or in a ‘stride position’ and shifts his body weight forward and backward; if feet are ‘side-by-side’ then body weight rocks from toes to heels and back; if feet are in stride then body weight transfers from one foot to the other as quickly as possible; part of each foot always remains in contact with the floor. The task is repeated until all perturbations are accomplished.

Adaptation to reduce difficulty –have participant adopt a wider BOS, with the feet either side-by-side or in stride

Adaptation to increase difficulty – have participant stand with the feet together (if side-by-side) or with the feet in tandem (if in stride position)

**Throwing and catching a ball** – if the participant has use of both arms he should catch and throw a ball back and forth with the physiotherapist; if the participant has functional use of only one arm he should hit a ball back that has been thrown by the physiotherapist.

Adaptation to reduce difficulty – have participant adopt a wider BOS

Adaptation to increase difficulty – have participant stand with the feet together

**Rapid arm raises forward and to the sides** – participant raises one arm, then both arms, to 90 degrees of shoulder flexion as quickly as possible and stops as quickly as possible; participant raises two arms, then one arm at a time, to 90 degrees of shoulder abduction as quickly as possible and stops as quickly as possible.

Adaptation to reduce difficulty – have participant adopt a wider BOS

Adaptation to increase difficulty – have participant stand with the feet together

**Rapid stepping forward with alternate feet** – participant steps forward as quickly as possible with the right foot then returns it to the starting position, then steps forward as quickly as possible with the left foot, and then returns it to the starting position; there should be a transfer of body weight to the stepping foot once it touches down in the forward position. The task is repeated until all perturbations are accomplished.

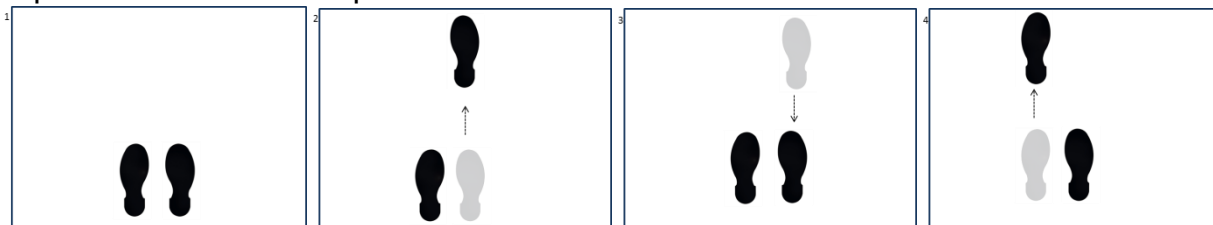

Figure 6.10. Rapid stepping forward with alternate feet

Adaptation to reduce difficulty – have participant take short steps

Adaptation to increase difficulty – have participant take long steps

Progressions of this task:

Standing on a thin foam mat

**Rapid stepping backward with alternate feet** – participant steps backward as quickly as possible with the right foot, then returns it to the starting position, then steps backward as quickly as possible with the left foot, and then returns it to the starting position; there should be a transfer of body weight to the stepping foot once it touches down in the backward position. The task is repeated until all perturbations are accomplished.

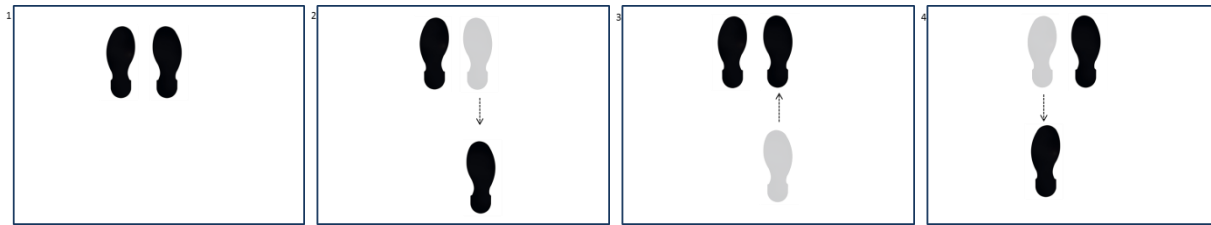

**Figure 6.11. Rapid stepping backward with alternate feet**

Adaptation to reduce difficulty – have participant take short steps

Adaptation to increase difficulty – have participant take long steps

Progressions of this task:

Standing on a thin foam mat

**Rapid stepping to the right (right foot)** – participant steps with the right foot to the right as quickly as possible, then back to the starting position; there should be transfer of body weight to the right foot once it touches down in the lateral position. The task is repeated until all perturbations are accomplished.

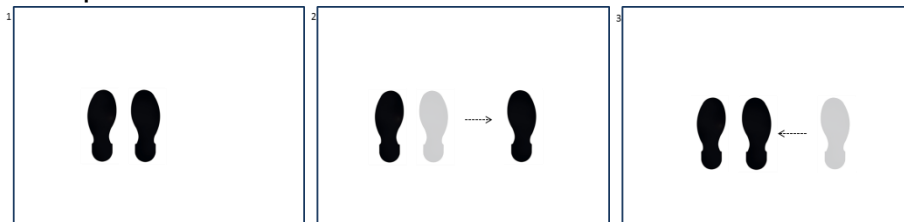

**Figure 6.12. Rapid stepping to the right (right foot)**

Adaptation to reduce difficulty – have participant take short steps

Adaptation to increase difficulty – have participant take long steps

**Rapid stepping to the left (left foot)** – participant steps with the left foot to the left as quickly as possible, then back to the starting position; there should be transfer of body weight to the left foot once it touches down in the lateral position. The task is repeated until all perturbations are accomplished.

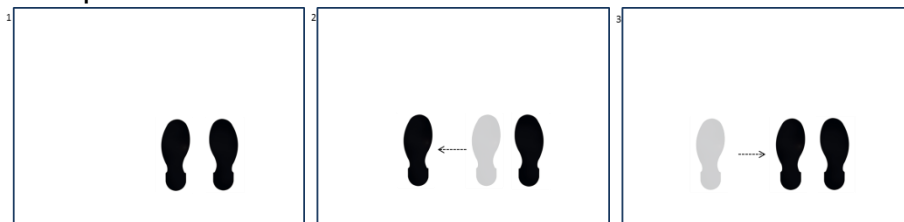

**Figure 6.13. Rapid stepping to the left (left foot)**

Adaptation to reduce difficulty – have participant take short steps

Adaptation to increase difficulty – have participant take long steps

**Rapid stepping to alternate sides**– participant steps with the right foot to the right as quickly as possible (including body weight transfer), then back to the starting position; then he steps with the left foot to the left as quickly as possible (including body weight transfer), then back to the starting position. The task is repeated until all perturbations are accomplished.

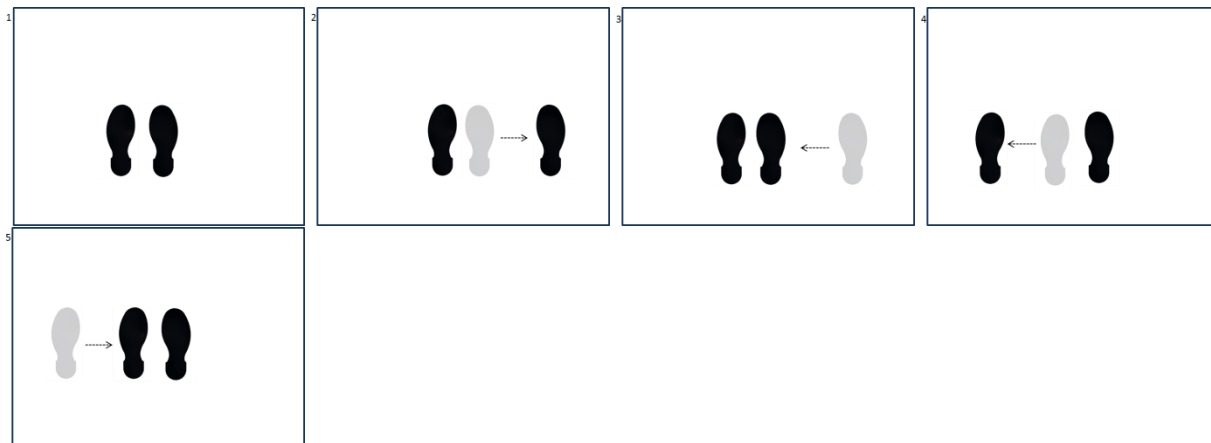

**Figure 6.14. Rapid stepping to alternate sides**

Adaptation to reduce difficulty – have participant take short steps

Adaptation to increase difficulty – have participant take long steps

Progressions of this task:

Standing on a thin foam mat

**Rapid tap-ups forward with alternate feet** – participant stands with a step in front of his feet; he lifts up the right foot and lightly touches the step, then places it back on the floor; then he lifts up the left foot and lightly touches the step, then places it back on the floor. The goal is to maintain the body weight over the stance limb, i.e. no transfer of body weight forward. The task is repeated until all perturbations are accomplished.

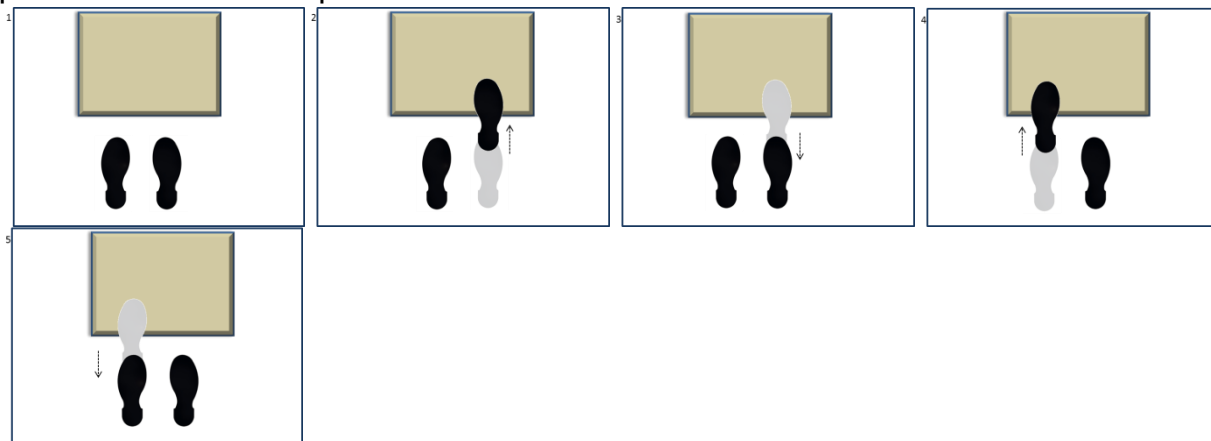

**Figure 6.15. Rapid tap-ups forward with alternate feet**

Adaptation to reduce difficulty – have participant tap-up to a low step

Adaptation to increase difficulty – have participant tap-up to an unstable surface, e.g. a soccer ball

Progressions of this task:

Standing on a thin foam mat

**Walking in place** – participant alternates stepping with the right and the left foot. The participant should not move from the spot, though a small amount of ‘drift’ is typical. The task is repeated until all perturbations are accomplished.

Adaptation to reduce difficulty – have participant step with minimal height from floor

Adaptation to increase difficulty – have participant step with maximum height from floor, i.e. knees raised to hip-height

Progressions of this task:

Walking on the spot on a thin foam mat

Eyes closed – if participant is unable, the lights in the room should be dimmed

Increased speed to ‘jogging’, or fast walking, on the spot

Jogging, or fast walking, on the spot on a thin foam mat

**Rapid stepping forward and backward with the right foot** – participant shifts his body weight to the left foot and then steps forward with the right foot, shifting some body weight forward but not enough to completely unweight the left; then the participant shifts his body weight back to the left foot in order to take a full step as far backward as possible with the right foot, and accepts some body weight on the right. The task is repeated until all perturbations are accomplished.

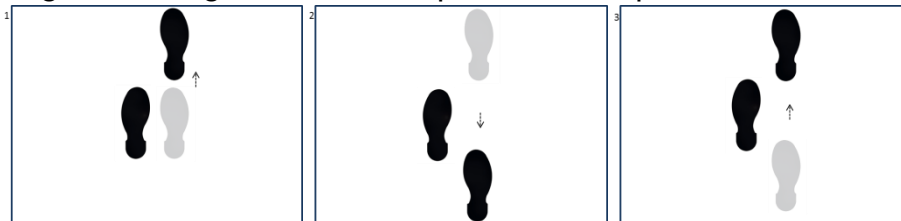

Figure 6.16. Rapid stepping forward and backward with the right foot

Adaptations to reduce difficulty – have participant take short steps; have participant rest momentarily between transitioning from front to back or from back to front

Adaptation to increase difficulty – have participant take long steps

Progressions of this task:

Standing on a thin foam mat

**Rapid stepping forward and backward with the left foot** – participant shifts his body weight to the right foot and then steps forward with the left foot, shifting some body weight forward but not enough to completely unweight the right; then the participant shifts his body weight back to the right foot in order to take a full step as far backward as possible with the left foot, and accepts some body weight on the left. The task is repeated until all perturbations are accomplished.

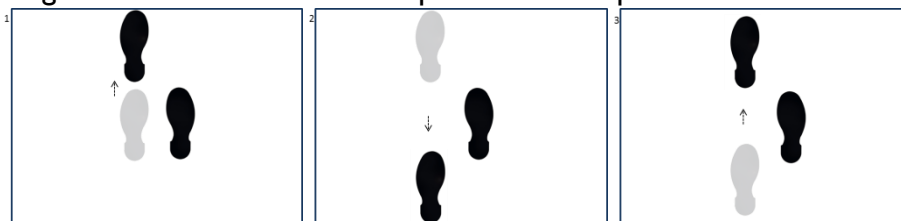

Figure 6.17. Rapid stepping forward and backward with the left foot

Adaptations to reduce difficulty – have participant take short steps; have participant rest momentarily between transitioning from front to back or from back to front

Adaptation to increase difficulty – have participant take long steps

Progressions of this task:

Standing on a thin foam mat

**Rapid step-ups with alternate feet** - participant stands with a step in front of his feet; he steps up onto the step with the right foot, shifts his body weight forward and steps up with the left foot, placing it on the step in a comfortably-wide position; then he steps down with the right foot, shifts his

body weight back onto the right foot and steps down with the left. The process is repeated with the right foot leading until 3 perturbations are completed; then the left leads until the final 3 perturbations are completed.

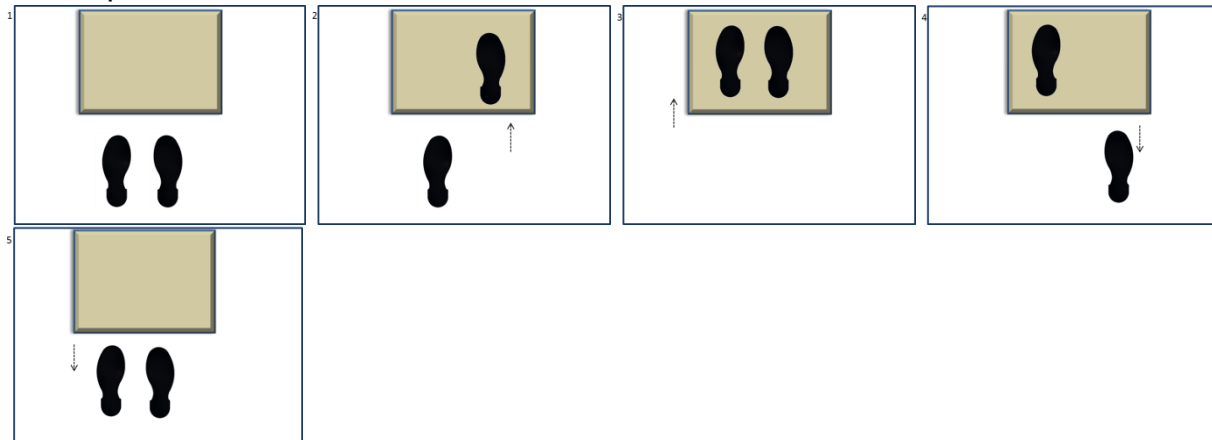

**Figure 6.18. Rapid step-ups with alternate feet**

Adaptation to reduce difficulty – have participant step-up to a low step

Adaptation to increase difficulty – have participant step-up to an unstable surface, for e.g., a step placed on a thin foam mat, or thick foam pad

Progressions of this task:

Standing on a thin foam mat – i.e. the person is standing on the mat, but the step may be on a hard surface, depending on the adaptation for difficulty

**Rapid tap-ups to alternate sides** – participant stands with a step lateral to each foot; he lifts up the right foot and lightly touches the step on the right, then places it back on the floor; then lifts up the left foot and lightly touches the step on the left, then places it back on the floor. The goal is to maintain the body weight over the stance limb, i.e., no transfer of body weight to the side tapping-up. The task is repeated until all perturbations are accomplished.

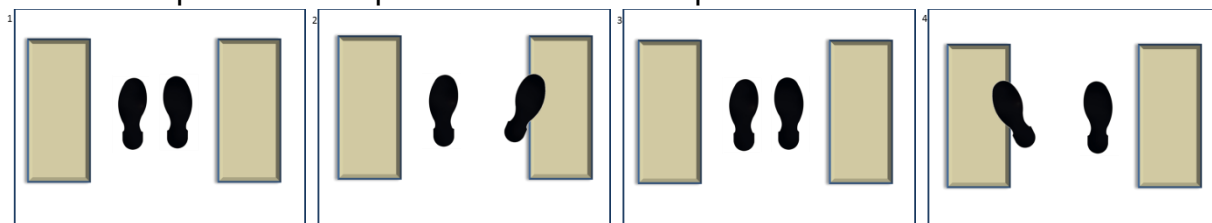

**Figure 6.19. Rapid tap-ups to alternate sides**

Adaptation to reduce difficulty – have participant tap-up to a low step

Adaptation to increase difficulty – have participant tap-up to an unstable surface, e.g. a soccer ball

Progressions of this task:

Standing on a thin foam mat – i.e. the person is standing on the mat, but the step/obstacle may be on a hard surface, depending on the adaptation for difficulty

**Rapid diagonal forward stepping with alternate feet** – participant steps diagonally forward (a 45° angle) as quickly as possible with the right foot, then returns it to the starting position, then steps diagonally forward as quickly as possible with the left foot, then returns it to the starting position; there should be a transfer of body weight to the stepping foot once it touches down in the diagonal position. The task is repeated until all perturbations are accomplished.

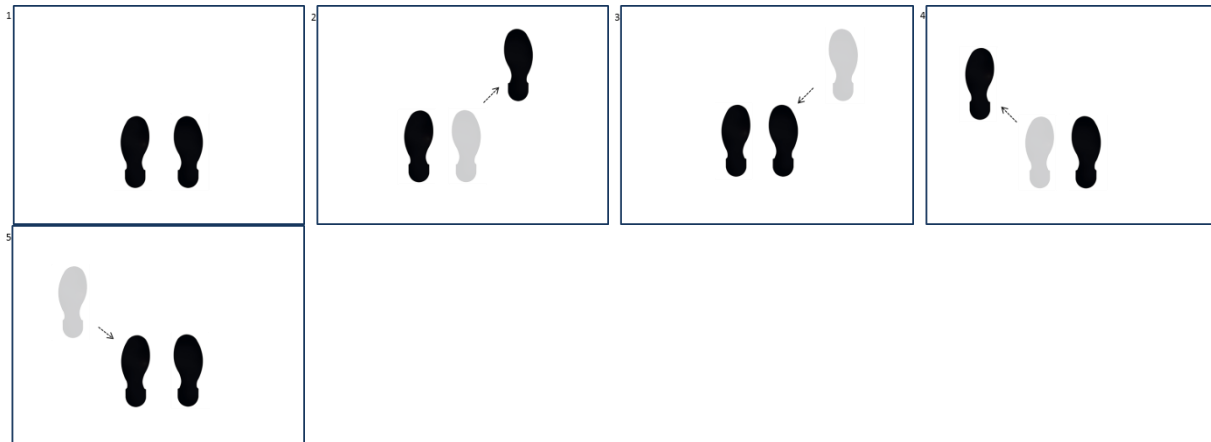

**Figure 6.20. Rapid diagonal forward stepping with alternate feet**

Adaptation to reduce difficulty – have participant take short steps

Adaptation to increase difficulty – have participant take long steps

Progressions of this task:

Standing on a thin foam mat

**Rapid stepping with alternate feet in random physiotherapist-cued directions** – participant stands in the centre of 6 targets placed on the floor (e.g., different colored Agility Dots); physiotherapist calls out a color and the participant steps to the colored dot with one foot (transferring some body weight) and then returns that foot to the centre; the process repeats with the next randomly called color. The task is repeated until all perturbations are accomplished.

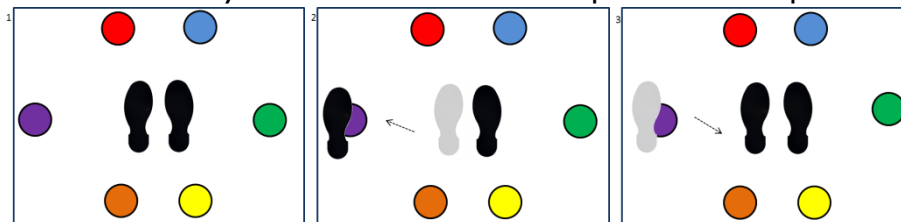

**Figure 6.21. Rapid stepping with alternate feet in random physiotherapist-cued directions**

Adaptation to reduce difficulty – targets require short steps

Adaptation to increase difficulty – targets require long steps

Progressions of this task:

Standing on a thin foam mat

**Walking forward** – participant takes steps to travel in a forward direction. Walking continues until all perturbations are accomplished.

Adaptations to reduce difficulty – have participant take short steps, or walk slowly

Adaptation to increase difficulty – have participant take long steps; traffic light\*

Progressions of this task:

Turning head to the right and left – to spot a target

Looking up and down – to spot a target

Stepping over obstacles –e.g. pool noodles

\* Traffic Light = participant walks at a fast pace like he would if crossing a street; physiotherapist counts down like the traffic light would in the crosswalk

Eyes closed – if participant is unable, the lights in the room should be dimmed  
 Walking on a thin foam mat

**Forward braiding** – participant takes a step forward with the right foot that crosses the midline path and lands lateral to, and slightly ahead of, the left foot; then he brings the left foot out and around the right foot, taking a step across the midline path that lands lateral to, and slightly ahead of, the right foot; then the process repeats until all perturbations are accomplished.

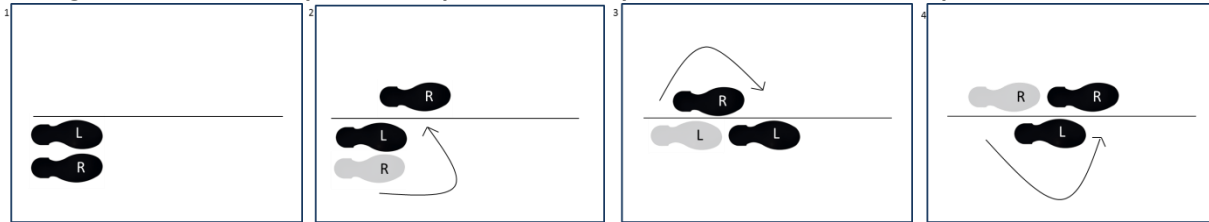

Figure 6.22. Forward braiding

Adaptation to reduce difficulty – walk on the line

Adaptations to increase difficulty - increase distance of step across line; take bigger steps; increase the walking speed

Progressions of this task:

Walking on a thin foam mat

**Side stepping** – participant stands on left side of room; he takes a step to the right with the right foot, followed by a step to the right (medially) with the left foot; the stepping continues until the edge of the room/available space is reached; then, starting from the right side of the room, he will walk in the opposite direction – left foot steps to left, followed by right foot stepping to left. Stepping continues until all perturbations are accomplished.

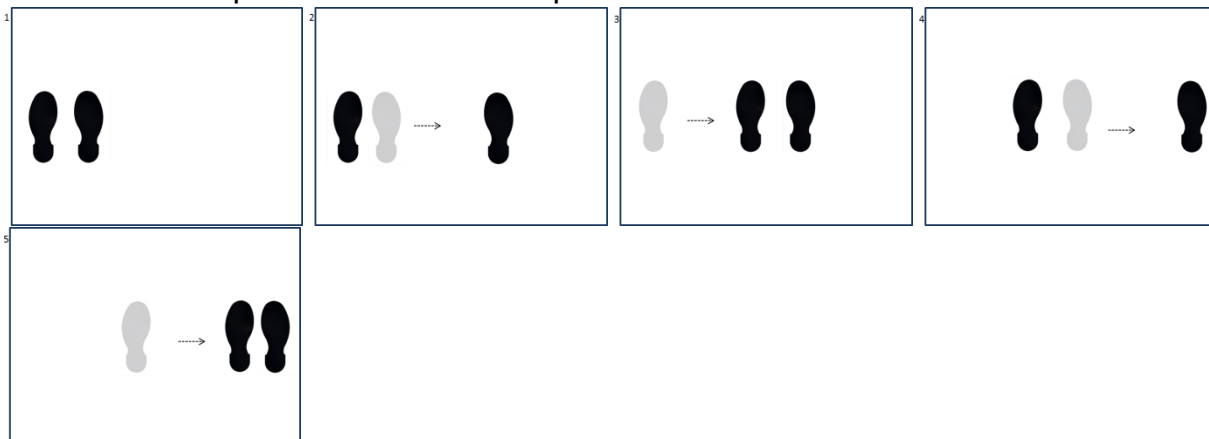

Figure 6.23. Side stepping

Adaptation to reduce difficulty – have participant take short steps

Adaptation to increase difficulty – have participant take long steps

Progressions of this task:

Stepping over obstacles –e.g. pool noodles

Walking on a thin foam mat

**Turning on the spot, alternating to the right and left** – participant takes steps to turn continuously in a clockwise direction. After a few turns (or 3 perturbations) the participant changes direction and turns counter-clockwise (until the final 3 perturbations are completed).

Adaptation to reduce difficulty – have participant turn slowly

Adaptations to increase difficulty – have participant turn quickly

Progressions of this task:

Eyes closed – if participant is unable, the lights in the room should be dimmed

Cued direction – physiotherapist calls out ‘right’ or ‘left’ and the participant turns in the direction called; it may be the same direction or a change in direction

Cued and Eyes closed – as written above but combined

**Four square stepping** – using tape, a cross is marked out on the floor creating 4 squares; participant stands in the bottom right-hand square facing forward; he is asked to step forward over the line with one foot then the other into the top right-hand square; then to step sideways, over the tape with the left foot and then the right into the top left-hand square; then to step backwards with one foot and then the other into the bottom left-hand square; and then finally, to step sideways with the right foot, then the left into the bottom right-hand square. He does that pattern a few times (or 3 perturbations) and then switches directions, moving in a clockwise pattern (until the final 3 perturbations are completed).

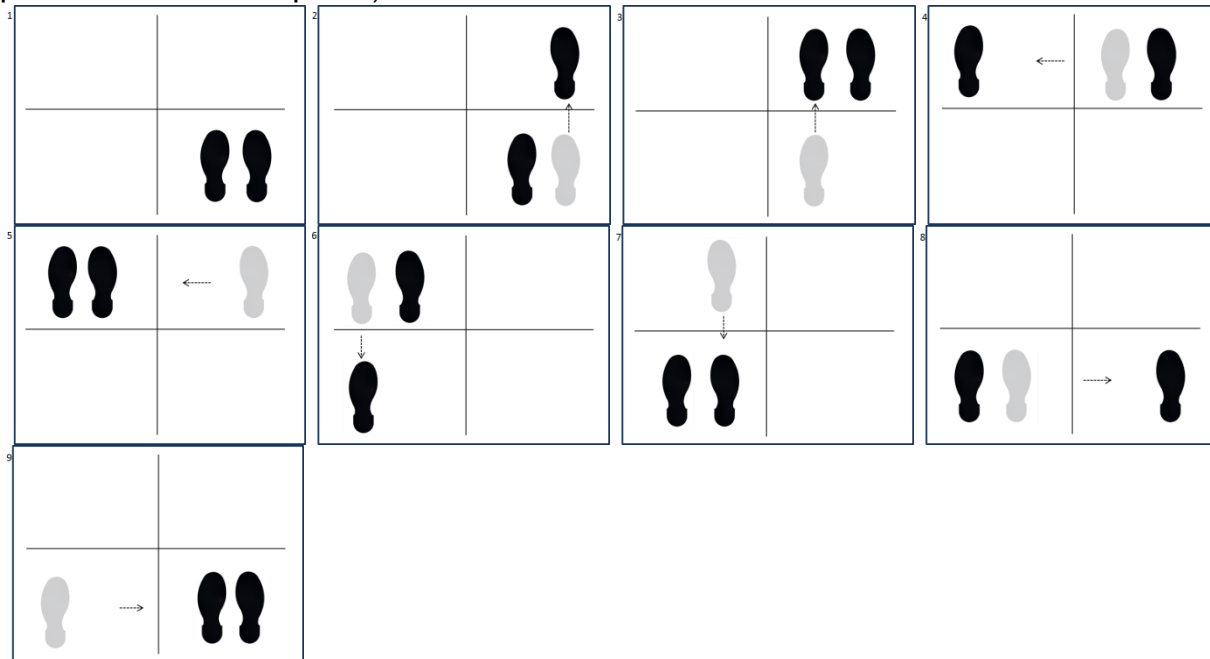

Figure 6.24. Four square stepping

Adaptation to reduce difficulty – have participant take short steps over the lines

Adaptation to increase difficulty – have participant take long steps over the lines

Progressions of this task:

Stepping on a thin foam mat

Cued direction – physiotherapist calls out ‘change’ or ‘switch’ and the participant begins moving in the opposite direction

**Walking backward** – participant takes steps to travel in a backward direction. Walking continues until all perturbations are accomplished.

Adaptation to reduce difficulty – have participant take short steps, or walk slowly

Adaptation to increase difficulty – have participant take long steps; traffic light

Progressions of this task:

Walking on a thin foam mat



**Tandem walking forward** - participant takes a step forward with the right foot and places the right heel ahead of the left toes; then he brings the left foot out and around the right foot, and places the left heel ahead of the right toes; then the process repeats until all perturbations are completed.

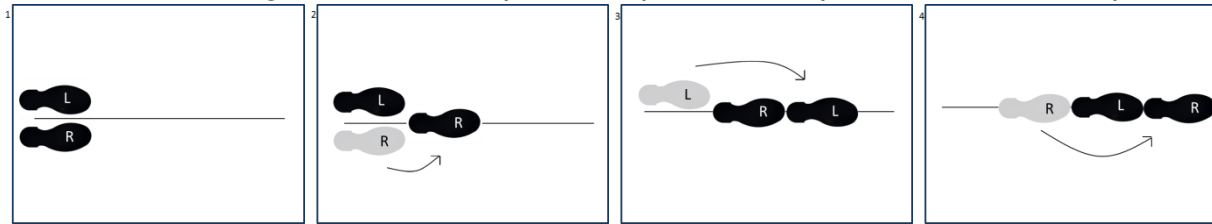

Figure 6.25. Tandem walking

Adaptations to reduce difficulty – participant takes longer steps (i.e. heel and toes don't touch) or participant places feet close to the line but not on the line

Adaptation to increase difficulty – traffic light

Progressions of this task:

Walking on a thin foam mat

**Sideways braiding** – participant stands at the right edge of the room; he is asked to walk to the left; he takes a step with the right foot that crosses over the left foot and lands lateral to, and slightly ahead of, the left foot, with part of his foot on the midline; then he brings the left foot out from behind the right and steps to the left, landing on the midline; then he takes a step with the right foot that crosses behind the left foot and lands lateral to, and slightly behind, the left foot, with part of his foot on the midline; then he takes the left foot over the right foot and steps to the left; and then the process repeats until he walks as far as he possibly can within the available space. Then he is asked to do the opposite and walk to the right. This pattern continues until all perturbations are accomplished.

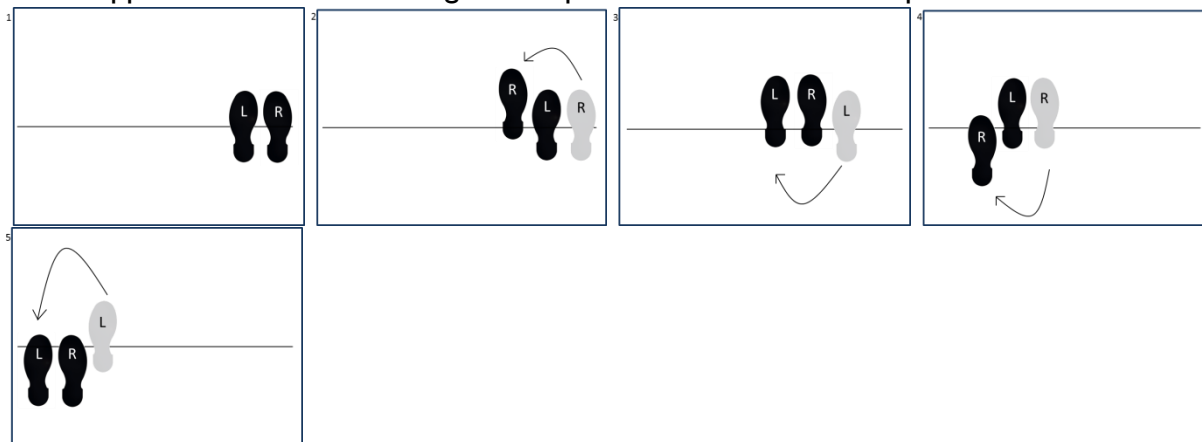

Figure 6.26. Sideways braiding

Adaptations to reduce difficulty – participant's foot does not fully cross over or behind the stance foot; or, participant's foot crosses but does not come into contact with midline

Adaptation to increase difficulty – traffic light

Progressions of this task:

Walking on a thin foam mat

**Tandem walking backward** - participant takes a step backward with the right foot and places the right toes behind the left heel; then he brings the left foot out and around the right foot, and places the left toes behind the right heel; then the process repeats until all perturbations are completed.

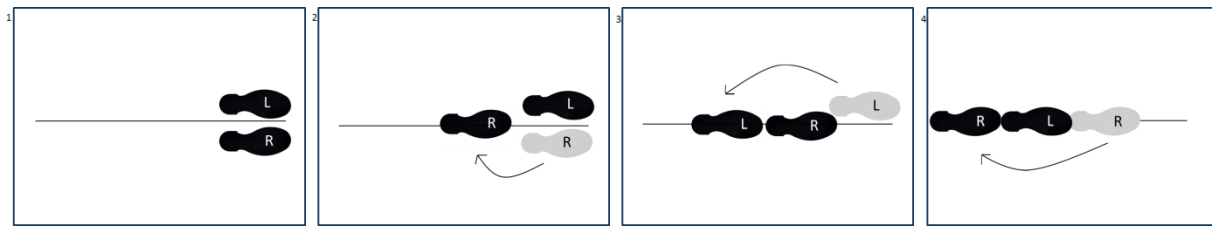

**Figure 6.27. Tandem walking backward**

Adaptations to reduce difficulty – participant takes longer steps (i.e. heel and toes don't touch) or participant places feet close to the line but not on the line

Adaptation to increase difficulty – traffic light

Progressions of this task:

Walking on a thin foam mat

**Backward braiding** – participant takes a step backward with the right foot that crosses the midline path and lands lateral to, and slightly behind, the left foot; then he brings the left foot out and around the right foot, taking a step backwards across the midline path that lands lateral to, and slightly behind, the right foot; then the process repeats until all perturbations are accomplished.

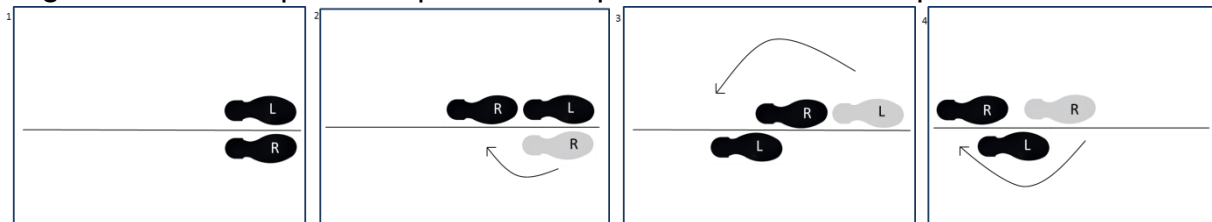

**Figure 6.28. Backward braiding**

Adaptation to reduce difficulty – walking on the line

Adaptations to increase difficulty - increase distance of step across line; take longer steps; traffic light

Progressions of this task:

Walking on a thin foam mat

**Kicking a soccer ball against wall** – participant stands at least 1 metre away from a wall; he kicks a soccer ball with enough force that it bounces back to him from the wall; he receives the ball and kicks it again. The task is repeated until all perturbations are accomplished.

Adaptation to reduce difficulty – none

Adaptations to increase difficulty – have participant stand further away from the wall; have participant kick it outside of his base of support; have participant alternate kicking with each foot

Progressions of this task:

Standing on a thin foam mat

Kicking the ball to the physiotherapist and receiving it back; this may require moving to reach the ball

Kicking the ball with the physiotherapist while standing on a thin foam mat

**Throwing a handball against the wall** – participant stands at least 1 metre away from a wall; he throws a hand ball with enough force that it bounces back to him from the wall; he receives the ball and throws it again. The task is repeated until all perturbations are accomplished.

Adaptation to reduce difficulty – have participant throw a large ball

Adaptations to increase difficulty – have participant throw a small ball; have participant stand further away from the wall; have participant throw the ball with each arm

Progressions of this task:

Standing on a thin foam mat

Throwing the ball to the physiotherapist and receiving it back; this may require moving to catch it

Throwing the ball with the physiotherapist while standing on a thin foam mat

**Walking with sudden stops and changes in direction** – participant walks forward and at any time, the physiotherapist says ‘stop’, and the participant has to stop walking quickly, or says ‘right’ (‘left’), and the participant has to turn to the right (left) and continue walking. The task continues until all perturbations are accomplished.

Adaptation to reduce difficulty – have participant walk slowly

Adaptation to increase difficulty – have participant walk quickly

Progressions of this task:

Stepping over obstacles, e.g. pool noodles or steps – the participant has to walk in the frame and manage the obstacles while also stopping or changing direction on command

**Move to different corners of the room** – participant stands in the centre of the room facing forward; he is asked to move to one corner of the room (marked with different colored Agility Dots or numbers); he walks forward to the corners in front of him, then backward to return to the start position, or he walks backward to the corners behind him, then forward to return to the start position. The task continues until all perturbations are accomplished.

Adaptation to reduce difficulty – have participant walk slowly

Adaptation to increase difficulty – have participant walk quickly

Progressions of this task:

Stepping over obstacles, e.g. pool noodles or steps – the participant has to walk in the frame and manage the obstacles while making his way to the correct pole

**Dodgeball** – the participant must avoid being hit by the ball that is being thrown at him by the physiotherapist. This requires transfer of weight and reactive stepping.

Adaptation to reduce difficulty – physiotherapist throws ball at upper body

Adaptation to increase difficulty – physiotherapist throws ball rapidly at participant’s feet

**6. RATING OF PERCEIVED CHALLENGE SCALE**

|                           |                                                                                     |   |
|---------------------------|-------------------------------------------------------------------------------------|---|
| NO CHALLENGE AT ALL       | 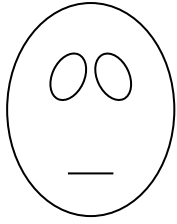   | 1 |
| A LITTLE BIT OF CHALLENGE |    | 2 |
| SOME CHALLENGE            |   | 3 |
| MUCH CHALLENGE            |  | 4 |
| CAN NOT DO                |  | 5 |

ADAPTED FROM: DARTHMOUTH COOP FUNCTIONAL ASSESSMENT CHARTS / WONCO (World Organization of Family Doctors) 1995
