# Supplementary material for: Does perturbation-based balance training prevent falls among individuals with chronic stroke? A randomised controlled trial
Source: PubMed Central journal article supplement — BMJ Open. 2018 Aug 17;8(8):e021510. doi: 10.1136/bmjopen-2018-021510 (PMC6104758; doi:10.1136/bmjopen-2018-021510), 2018-08-17
Supplement: bmjopen-2018-021510supp002.pdf [file bmjopen-2018-021510supp002.pdf]

## SUPPLEMENTARY TABLES

**Table S1: Balance and mobility measures, change over time.** Values presented are the differences from pre-training with 95% confidence intervals in brackets. A positive difference value indicates an improvement for all variables except the TUG, where a negative value indicates an improvement (i.e., faster TUG time compared to baseline).

|                           | <b>PBT</b>       | <b>Control</b>   |
|---------------------------|------------------|------------------|
| <b>Post-training</b>      |                  |                  |
| N                         | 39               | 38               |
| ABC (%)                   | 5.2 [0.7, 9.8]   | 6.6 [1.5, 11.6]  |
| BBS (score)               | 1.8 [0.7, 2.9]   | 1.9 [1.0, 2.9]   |
| Mini-BEST (score)         | 2.6 [1.8, 3.4]   | 2.2 [1.5, 3.0]   |
| BEST-anticipatory (score) | 0.5 [0.2, 0.8]   | 0.5 [0.2, 0.8]   |
| BEST-reactive (score)     | 1.5 [0.9, 2.1]   | 0.8 [0.3, 1.2]   |
| BEST-sensory (score)      | 0 [-0.2, 0.2]    | 0.3 [0.0, 0.5]   |
| BEST-gait (score)         | 0.6 [0.1, 1.0]   | 0.7 [0.3, 1.1]   |
| TUG (s)                   | -1.0 [-2.9, 0.8] | -1.1 [-2.8, 0.5] |
| <b>6-month follow-up</b>  |                  |                  |
| N                         | 30*              | 30*              |
| ABC (%)                   | 3.5 [-2.3, 9.2]  | 0.6 [-5.2, 6.3]  |
| BBS (score)               | 0.3 [-0.8, 1.4]  | 1.3 [0.2, 2.4]   |
| Mini-BEST (score)         | 1.6 [0.6, 2.6]   | 0.8 [-0.1, 1.7]  |
| BEST-anticipatory (score) | 0.3 [-0.1, 0.6]  | 0.3 [-0.1, 0.7]  |
| BEST-reactive (score)     | 1.2 [0.5, 1.8]   | 0.0 [-0.5, 0.5]  |
| BEST-sensory (score)      | 0.1 [-0.2, 0.3]  | 0.2 [-0.1, 0.5]  |
| BEST-gait (score)         | 0.1 [-0.6, 0.8]  | 0.3 [-0.1, 0.8]  |
| TUG (s)                   | 1.0 [-1.0, 2.9]  | -0.5 [-1.4, 0.5] |
| <b>12-month follow-up</b> |                  |                  |
| N                         | 27 <sup>†</sup>  | 29 <sup>†</sup>  |
| ABC (%)                   | 3.5 [-3.1, 10.2] | 3.8 [-2.7, 10.3] |
| BBS (score)               | 0.6 [-0.7, 1.8]  | 0.8 [-0.3, 2.0]  |
| Mini-BEST (score)         | 2.2 [0.9, 3.4]   | 0.1 [-1.1, 1.4]  |
| BEST-anticipatory (score) | 0.2 [-0.1, 0.5]  | 0.2 [-0.2, 0.7]  |
| BEST-reactive (score)     | 1.4 [0.5, 2.3]   | -0.4 [-1.0, 0.2] |
| BEST-sensory (score)      | 0.1 [-0.2, 0.4]  | 0.1 [-0.1, 0.4]  |
| BEST-gait (score)         | 0.4 [-0.3, 1.2]  | 0.2 [-0.4, 0.8]  |
| TUG (s)                   | 0.1 [-1.0, 1.2]  | 1.6 [-0.4, 3.6]  |

ABC=activities-specific balance confidence scale; BBS=Berg balance scale; BEST=balance evaluation systems test.

\*N=32 PBT and 31 control for the ABC at 6-month follow-up. <sup>†</sup>N=31 PBT and 31 control for the ABC at 12-month follow-up.

**Table S2: Physical activity and social integration, change over time.** Values presented are the difference from pre-training with 95% confidence intervals in brackets. A positive difference value indicates an improvement.

|                           | <b>PBT</b>        | <b>Control</b>    |
|---------------------------|-------------------|-------------------|
| <b>Post-training</b>      |                   |                   |
| N                         | 39                | 38                |
| PASIPD (score)            | 1.1 [-2.0, 4.2]   | -1.0 [-3.1, 1.0]  |
| SIPSO (score)             | 0.5 [-1.4, 2.5]   | 1.8 [0.0, 3.7]    |
| <b>2-month follow-up</b>  |                   |                   |
| N                         | 38                | 31                |
| PASIPD (score)            | -2.1 [-5.1, 0.8]  | -2.8 [-5.8, 0.3]  |
| SIPSO (score)             | -0.1 [-1.7, 1.6]  | 1.5 [-0.4, 3.4]   |
| <b>4-month follow-up</b>  |                   |                   |
| N                         | 33                | 34                |
| PASIPD (score)            | -1.7 [-4.2, 0.8]  | -4.1 [-6.6, -1.5] |
| SIPSO (score)             | 0.5 [-1.2, 2.2]   | 0.7 [-1.3, 2.7]   |
| <b>6-month follow-up</b>  |                   |                   |
| N                         | 32                | 31*               |
| PASIPD (score)            | 0.4 [-5.3, 6.2]   | -2.2 [-5.6, 1.1]  |
| SIPSO (score)             | 0.3 [-1.0, 1.7]   | 2.5 [0.8, 4.2]    |
| <b>8-month follow-up</b>  |                   |                   |
| N                         | 31                | 26                |
| PASIPD (score)            | -4.5 [-7.3, -1.6] | -5.7 [-9.7, -1.6] |
| SIPSO (score)             | 0.2 [-1.1, 1.5]   | 1.8 [0.4, 3.3]    |
| <b>10-month follow-up</b> |                   |                   |
| N                         | 32                | 32                |
| PASIPD (score)            | -4.1 [-6.6, -1.7] | -3.5 [-6.7, -0.4] |
| SIPSO (score)             | -0.3 [-1.6, 1.0]  | 2.2 [0.4, 3.9]    |
| <b>12-month follow-up</b> |                   |                   |
| N                         | 31                | 31                |
| PASIPD (score)            | 0.4 [-4.6, 5.4]   | -2.9 [-6.0, 0.2]  |
| SIPSO (score)             | 0.8 [-0.7, 2.3]   | 2.7 [0.9, 4.4]    |

PASIPD=physical activity scale for individuals with physical disabilities; SIPSO=subjective index of physical and social outcome

\*N=30 control for the SIPSO
